# Supplementary material for: Acceptance and compliance with micronutrient powder (MNP) among children aged 6–23 months in northern Nigeria
Source: PLOS journal article supplement (doi:10.1371/journal.pgph.0000961), 2022-10-17
Supplement: S8 (10.1371/journal.pgph.0000961.s008) [file journal.pgph.0000961.s008]

## SPOT CHECK RECORDING FORM

State: Adamawa LGA: \_\_\_\_\_Song\_\_\_\_\_ Community: \_Wurokoncha\_

Name of caregiver (female): Aminatu Bulus

Name or caregiver (male): .....

Sex of index child: \_female\_\_\_ Age of index child (in months): \_ 10 months\_\_\_\_\_

### Spot Check Information

1. Date of MNP distribution to household (circle option below based on LGA name above):

✚ Kebbi: BirninKebbi&Jega LGA: June 16

✚ Kebbi: Danko-wasagu: June 17

✚ Adamawa:Song, Ganye: (June 18)

✚ Adamawa:Guyuk June 19

2. Date of Spot Check Observation: \_\_\_\_\_5/7/2015\_\_\_\_\_

3. Number of sachets remaining(Ask the caregiver to show you and count the specific number of sachets remaining):

42

4. Number of sachets that should remainusing one MNP sachet per day (Analyst only):

44

5. Number of sachets remaining / number of sachets should be remaining(Analyst only):

\_\_\_\_\_42\_\_\_\_\_ / \_\_\_\_\_44\_\_\_\_\_ = \_\_\_\_\_95.5\_\_\_\_\_ %

## **Probes**

**Question 1.** You have **XX** MNP sachets remaining. Explain how easy or difficult it was to use the MNP product on a daily basis for your child 6 – 23 months? (Circle one answer)

**(Very Difficult)**

**Difficult**

**Easy**

**Very Easy**

**Question 2.** Describe any specific challenges that you faced that made the MNP difficult to use on a daily basis?

- I sometimes forget but have to be reminded by my husband
- The baby has been sick for some time now
- I don't know the exact importance of the powder

**Question 3.** Describe specific aspects of the MNP product that you or your child enjoyed that made it easier to use on a daily basis?

- None. For now because I need more clarification and explanation about this powder.

**Question 4.** What questions do you have about the MNP based on your experience using it?

- Is this powder a drug or what?
- Is it only in kunu that can be use to mix it.
- What of if I forget to give the baby for say two days. What is the implication.

**Question 5.** What specific recommendations do you have that we can do as a program to make the MNP easier to use on a daily basis?

I can't think of any for now
