# Supplementary material for: Acceptance and compliance with micronutrient powder (MNP) among children aged 6–23 months in northern Nigeria
Source: PLOS journal article supplement (doi:10.1371/journal.pgph.0000961), 2022-10-17
Supplement: S8 (10.1371/journal.pgph.0000961.s008) [file journal.pgph.0000961.s008]

### 1.1.1 Instrument F –Direct Observation Form

#### <<Instrument F Direct Observation Form>>

**PI Name:** PragmaMathema, Stephen Kodish

**Study Title:** Formative research to develop an infant and young child feeding (IYCF) intervention with micronutrient powder (MNP) for children aged 6 – 23 months

**PI Version/Date:** Version1.0/January 24, 2015

Date: 19/06/2015 Location: Nufawa

Data Collector: Samira Adamu

Main goals of this direct observation are to answer the following questions:

1. In this household, what would be the best way(s) to give nutritional supplements to young children? Why?
2. In this household, describe the food sharing that you observe throughout the meal. Are there any predictable patterns?
3. In this household, who is favored and how is this favoritism expressed during meal preparation and eating?

Household Composition Table (Fill out as you do data collection)

| INITIALS | SEX (M/F) | AGE (estimated) | Relationship to household | Description (not necessary)                     |
|----------|-----------|-----------------|---------------------------|-------------------------------------------------|
| BGB      | F         | 20months        | Youngest child            | Baby girl with black rope tied to the neck      |
| M        | F         | 17years         | Mother                    | Mother of the baby with blue and yellow wrapper |
| ML       | F         | 45years         | Mother-in-law             | Black woman with blue and white scarf           |
| FL       | M         | 52years         | Father-in-law             | Tall dark man with light blue clothes           |
| BGG      | F         | 6years          | Cousin                    | Girl wearing a green wrapper with grey veil     |
| BBC      | M         | 3years,6months  | Cousin                    | Dark boy wearing a yellow top                   |
|          |           |                 |                           |                                                 |

|    |   |          |          |                                                     |
|----|---|----------|----------|-----------------------------------------------------|
| F  | M | 25 years | father   | Tall and dark wearing orange clothes                |
| BG | F | 15months | neighbor | Baby girl, dark in complexion from the neighborhood |
|    |   |          |          |                                                     |
|    |   |          |          |                                                     |
|    |   |          |          |                                                     |
|    |   |          |          |                                                     |

PARTICIPANT ID: \_\_\_\_\_

| TIME  | ACTOR INITIALS | RECIPIENT INITIALS | WHAT HAPPENED                                                        | FOOD | Reactivity                                    |
|-------|----------------|--------------------|----------------------------------------------------------------------|------|-----------------------------------------------|
| 10:05 | M              | BGB                | Rubbing tropical ointment on the child while sleeping                |      | Started using tropical ointment on her rashes |
| 10:10 | BGB            |                    | Sleeping on the mat                                                  |      |                                               |
| 10:15 | BGB            |                    | Sleeping on the mat                                                  |      |                                               |
| 10:15 | M              |                    | Washing clothes in the surrounding                                   |      |                                               |
| 10:15 | ML             |                    | Giving the animals, animal feeds                                     |      |                                               |
| 10:20 | M              |                    | Trying to make the baby up i.e rubbing powder, eyeliner and lipstick |      | R                                             |
| 10:25 | BGB            |                    | Still sleeping on the mat                                            |      |                                               |
| 10:25 | M              | BGB                | Wearing pants for the baby                                           |      | R                                             |
| 10:30 | M              |                    | Washing clothes                                                      |      |                                               |
|       | BGB            |                    | Sleeping on the mat                                                  |      |                                               |

| TIME  | ACTOR INITIALS | RECIPIENT INITIALS | WHAT HAPPENED                               | FOOD         | Reactivity |
|-------|----------------|--------------------|---------------------------------------------|--------------|------------|
| 10:35 | BGB            |                    | Sleeping on the mat                         |              |            |
|       | M              |                    | Spreading mat on the floor                  |              |            |
|       | ML             |                    | Lying down under the tree                   |              |            |
| 10:40 | BGB            |                    | Sleeping on the mat                         |              |            |
| 10:45 | BGB            |                    | Woke up and started crying                  |              |            |
|       | M              |                    | Still sleeping                              |              |            |
|       | ML             |                    | Lying under the tree                        |              |            |
| 10:50 | M              | BGB                | Feeding the baby kunu                       | Kunun millet |            |
| 10:55 | M              | BGB                | Feeding the baby kunu                       | Kunun millet |            |
| 11:00 | BGB            |                    | Sitting on the mat                          |              |            |
|       | M              | BGB                | Wearing clothes for the baby                |              |            |
| 11:05 | ML             | BGB                | Carrying the child                          |              |            |
|       | M              |                    | Washing clothed                             |              |            |
| 11:10 | ML             | BGB                | Carrying the child                          |              |            |
| 11:15 | BGB            |                    | Sitting on the stool at grand mother's side |              |            |
|       | M              |                    | Still washing clothes                       |              |            |
|       | ML             |                    | Carrying a bucket of water to the toilet    |              |            |
| 11:20 | M              |                    | Drying clothes on the fence                 |              |            |
|       |                |                    |                                             |              |            |

| TIME  | ACTOR INITIALS | RECIPIENT INITIALS | WHAT HAPPENED                                                                                   | FOOD        | Reactivity |
|-------|----------------|--------------------|-------------------------------------------------------------------------------------------------|-------------|------------|
|       | BGB            |                    | Still sitting on the stool                                                                      |             |            |
| 11:25 | BGB            |                    | Crying and holding mother's leg                                                                 |             |            |
|       | M              |                    | Still washing clothes                                                                           |             |            |
| 11:30 | ML             | BGB                | Carrying the baby outside to another household                                                  |             |            |
| 11:35 | ML             | BGB                | Backing the baby and trekking to another household                                              |             |            |
| 11:40 | ML             | BGB                | Backing the baby and trekking to another household                                              |             |            |
| 11:45 | ML             | BGB                | Backing the baby and trekking to another household                                              |             |            |
| 11:50 | ML             | BGB                | Backing the baby and greeting the household persons<br>A naming ceremony is going to take place |             |            |
| 11:55 | BGB            |                    | Playing beside the grandmother.<br>Some women are frying waina (rice puff puff)                 |             |            |
| 12:00 | BGB            | BGB                | Eating waina by herself                                                                         | Waina ghero |            |
|       |                | ML                 | frying waina                                                                                    | Waina ghero |            |
| 12:05 | BGB            | BGB                | Feeding herself waina                                                                           | Waina ghero |            |
|       | ML             |                    | Still frying waina                                                                              |             |            |
| 12:10 | BGB            | BGB                | Feeding herself waina                                                                           | Waina ghero |            |
|       |                |                    |                                                                                                 |             |            |

| TIME  | ACTOR INITIALS | RECIPIENT INITIALS | WHAT HAPPENED                                                        | FOOD         | Reactivity |
|-------|----------------|--------------------|----------------------------------------------------------------------|--------------|------------|
| 12:15 | BGB            | BGB                | Feeding herself waina                                                | Waina ghero  |            |
| 12:20 | BGB            |                    | Carrying a black polythene back with waina inside                    | Waina ghero  |            |
|       | ML             |                    | Standing beside the child                                            |              |            |
| 12:25 | BGG            | BGB                | Backing the child                                                    |              |            |
|       | BGB            |                    | Carrying the black polythene with waina                              | Waina ghero  |            |
| 12:30 | BGG            | BGB                | Backing the child                                                    |              |            |
|       | BGB            |                    | Holding the black polythene containing waina                         | Waina ghero  |            |
| 12:35 | BGG            | BGB & BBL          | Backing the baby and holding boys and trekking back to the household |              |            |
| 12:40 | BGG            | BGB & BBL          | Backing the baby and holding boys and trekking back to the household |              |            |
| 12:45 | BGG            |                    | Sharing the waina to the child and other son                         | Waina ghero  |            |
|       | M              |                    | Sieving grinded watery millet to remove shaft                        | Millet       |            |
| 12:50 | BGB            | BGB                | Still eating waina                                                   | Waina millet |            |
|       | M              |                    | Still sieving grinded watery millet to remove shaft                  | Millet       |            |
| 12:55 | BGB            | BGB                | Still eating waina and playing with slippers                         | Waina millet |            |
|       |                |                    |                                                                      |              |            |

| TIME | ACTOR INITIALS | RECIPIENT INITIALS | WHAT HAPPENED                       | FOOD | Reactivity |
|------|----------------|--------------------|-------------------------------------|------|------------|
| 1:00 | BGB            |                    | Stooling on the floor               |      |            |
| 1:05 | M              | BGB                | Cleaning and washing the child      |      |            |
| 1:10 | BGB            |                    | Playing with cousins                |      |            |
| 1:15 | BGB            |                    | Playing with sand                   |      |            |
| 1:15 | M              |                    | Lying beside her grandmother        |      |            |
| 1:20 | BGB            |                    | Playing with sand                   |      |            |
| 1:25 | BGB            |                    | Playing with sand                   |      |            |
| 1:30 | BGB            |                    | Still playing with sand             |      |            |
|      | M              |                    | lying down beside her               |      |            |
| 1:35 |                |                    | The baby is crying                  |      |            |
| 1:40 | BGB            | BGB                | Eating dabino                       |      |            |
| 1:45 | BGB            |                    | The baby is crying                  |      |            |
|      | F              |                    | Holding the baby's hand to the room |      |            |
| 2:00 | BGB            |                    | The baby is still crying            |      |            |
|      | M              | BGB                | Carrying the baby on her laps       |      |            |
|      |                | BGB                | The baby is sleeping                |      |            |
| 2:05 |                | M                  | She is tying the goats              |      |            |
| 2:10 | BGB            |                    | She is sleeping                     |      |            |
| 2:15 | BGB            |                    | She is sleeping                     |      |            |
|      | M              |                    | Giving the animals feed             |      |            |
| 2:20 | BGB            |                    | She is sleeping                     |      |            |

| TIME | ACTOR INITIALS | RECIPIENT INITIALS | WHAT HAPPENED                   | FOOD | Reactivity |
|------|----------------|--------------------|---------------------------------|------|------------|
| 2:25 | BGB            |                    | She is sleeping                 |      |            |
| 2:30 | BGB            |                    | She is sleeping                 |      |            |
| 2:35 | BGB            |                    | She is sleeping                 |      |            |
| 2:40 | BGB            |                    | She is sleeping                 |      |            |
|      | FL             |                    | Coming back from the mosque     |      |            |
| 2:45 | BGB            |                    | She is sleeping                 |      |            |
| 2:50 | BGB            |                    | She is sleeping                 |      |            |
| 2:55 | BGB            |                    | She is sleeping                 |      |            |
|      | M              |                    | She is washing plates and bowls |      |            |
| 3:00 | BGB            |                    | She is sleeping                 |      |            |
|      | M              |                    | She is washing plates and bowls |      |            |
| 3:05 | BGB            |                    | She is sleeping                 |      |            |
|      | M              |                    | She is washing plates and bowls |      |            |
| 3:10 | BGB            |                    | She is sleeping                 |      |            |
|      | M              |                    | She is washing plates and bowls |      |            |
| 3:15 | BGB            |                    | She is sleeping                 |      |            |
| 3:20 | BGB            |                    | She is sleeping                 |      |            |
| 3:25 | BGB            |                    | She is sleeping                 |      |            |
| 3:30 | BGB            |                    | She is sleeping                 |      |            |
|      | BGB            |                    | She is sleeping                 |      |            |
|      |                |                    |                                 |      |            |

| TIME | ACTOR INITIALS | RECIPIENT INITIALS | WHAT HAPPENED           | FOOD         | Reactivity |
|------|----------------|--------------------|-------------------------|--------------|------------|
| 3:35 | BGB            | BGB                | She is eating dakaule   | moringa      |            |
| 3:40 | BGB            | BGB                | She is drinking kunu    | Kunun millet |            |
| 3:45 | BGB            | BGB                | She is drinking kunu    | Kunun millet |            |
| 3:50 | BGB            | BGB                | She is drinking kunu    | Kunun millet |            |
| 3:55 | BGB            |                    | She is crying           |              |            |
| 4:00 | M              | BGB                | She is bathing the baby |              |            |
| 4:05 | M              | BGB                | She is bathing the baby |              |            |
| 4:10 | BGB            |                    | Playing in water        |              |            |

|      |     |  |                                  |  |  |
|------|-----|--|----------------------------------|--|--|
| 4:15 | BGB |  | Playing in water                 |  |  |
|      | ML  |  | Coming into the household        |  |  |
| 4:20 | BGB |  | Happily playing with grandmother |  |  |
| 4:25 | BGB |  | Playing alone with sand          |  |  |
| 4:30 |     |  | Playing beside the mother        |  |  |
| 4:35 |     |  | She is praying                   |  |  |
| 4:40 | BGB |  | Playing around alone             |  |  |
| 4:45 | BGB |  | Playing around alone             |  |  |
|      | ML  |  | Observing prayers                |  |  |
| 4:50 | BGB |  | Roaming about alone              |  |  |
|      |     |  |                                  |  |  |



|      |        |     |                                                     |             |  |
|------|--------|-----|-----------------------------------------------------|-------------|--|
| 4:55 | BGB    |     | Playing and holding mother's leg                    |             |  |
|      | M      |     | Walking and playing with child                      |             |  |
| 5:00 | BGB    |     | Lying on the mat                                    |             |  |
|      | ML     |     | Lying with the child on the mat                     |             |  |
| 5:05 | BGB    |     | Playing with empty carton                           |             |  |
| 5:10 | BGB    |     | Playing in the neighborhood with two other children |             |  |
| 5:15 | BGB&BG |     | Playing with child from the neighborhood            |             |  |
| 5:20 | BGB    |     | Playing with chicken in then house                  |             |  |
|      | F      |     | Fixing standing fan                                 |             |  |
| 5:25 | BGB    |     | Playing with other children from the neighborhood   |             |  |
| 5:30 | BGB    |     | Roaming around in the house                         |             |  |
| 5:35 | BGB    | BGB | Feeding with kunu                                   | kunu millet |  |
| 5:40 | BGB    |     | Feeding with kunu                                   | Kunu millet |  |
| 5:45 | BGB&BG |     | Playing together with sand                          |             |  |
| 5:50 | BGB&BG |     | Playing together in the neighborhood                |             |  |
| 5:55 | ML     |     | Sharing waina to neighbor's children                |             |  |
|      | ML     | BGB | Giving the baby waina                               | Waina maize |  |
| 6:00 | BGB    | BGB | Eating waina with miyan kuka                        |             |  |
| 6:05 | M      |     | Setting fire and putting pot on fire                |             |  |
|      |        |     |                                                     |             |  |

|      |        |     |                                                                                                                 |                 |  |
|------|--------|-----|-----------------------------------------------------------------------------------------------------------------|-----------------|--|
|      | ML     |     | Fetching water from well                                                                                        |                 |  |
|      | M&ML   |     | Both sieving well water into pot                                                                                |                 |  |
|      | BGB    | BGB | Eating waina and miyan kuka                                                                                     |                 |  |
| 6:10 | M      |     | Setting fire                                                                                                    |                 |  |
|      | M      | BGG | Adding more waina for the baby                                                                                  | Waina<br>maize  |  |
|      | BGB    |     | Eating waina                                                                                                    |                 |  |
|      |        |     | Still fetching water from the well                                                                              |                 |  |
| 6:15 | ML/BGB |     | Came back from fetching water                                                                                   |                 |  |
| 6:20 | M      | BGB | Carrying the baby on her laps                                                                                   |                 |  |
| 6:25 | M      | BGB | Backing the baby because e of the wind                                                                          |                 |  |
| 6:30 | M      | BGB | Backing the baby and packing things from outside because it may rain because its cloudy<br>Pot is still on fire |                 |  |
| 6:35 | ML     |     | Pounding kuli-kuli                                                                                              |                 |  |
|      | ML     | BGB | Giving the child kuli-kuli                                                                                      |                 |  |
| 6:40 | ML     |     | Preparing paste from sieved millet, though it was raining heavily                                               |                 |  |
|      | ML     |     | Fetching small portion of the paste on the small bowl                                                           | Millet          |  |
|      | ML     |     | Adding boiled water into the large quantity of paste using a sieve to sieve the water off particles             |                 |  |
|      | ML     |     | Stirring the kunu                                                                                               | Kunun<br>millet |  |
|      |        |     |                                                                                                                 |                 |  |

|      |     |     |                                                                                           |              |  |
|------|-----|-----|-------------------------------------------------------------------------------------------|--------------|--|
|      | ML  |     | Adding more boiling water to the kunu                                                     |              |  |
|      | ML  |     | Carrying the kunu to her room                                                             | Kunun millet |  |
|      | ML  |     | Stirring the kunu again                                                                   | Kunun millet |  |
| 6:50 | M   | BGB | Backing the baby                                                                          |              |  |
| 6:53 | ML  |     | Adding then small portion fetched from the paste to make the kunu thicker                 | Kunun millet |  |
| 6:55 | ML  |     | Adding more of the small portion fetched to the kunu to make it thick                     |              |  |
| 6:55 | M   | BGB | Carrying the child her laps and covering her                                              |              |  |
| 7:00 | M   | BGB | Carrying the child her laps and covering her                                              |              |  |
| 7:05 | M   | BGB | Carrying the child her laps and covering her                                              |              |  |
| 7:10 | M   | BGB | Giving the child double dose of multi vitamin because the child missed the afternoon dose |              |  |
| 7:15 | ML  |     | Brought kunu for the son and daughter in-law                                              | Kunun millet |  |
| 7:20 | M   | BGB | Backing the baby                                                                          |              |  |
|      | F   |     | Preparing a mango juice with sachet water and cow milk                                    |              |  |
|      | F   | M   | Giving the juice prepared                                                                 |              |  |
| 7:25 | BGB |     | Taking orange juice                                                                       |              |  |
|      |     |     |                                                                                           |              |  |

|      |     |     |                                                       |                |  |
|------|-----|-----|-------------------------------------------------------|----------------|--|
|      | F   | BGB | Giving her kwai da kwai bu the BGB refused to collect |                |  |
| 7:30 | F   | BGB | Giving her orange juice                               |                |  |
|      | BGB | BGB | Eating the kwaik-kwai                                 | Soya bean cake |  |
| 7:35 | ML  |     | Bringing fanta, orange and bread for me               |                |  |
|      | BGB |     | Still eating kwai-da-kwai                             | Soya bean cake |  |
| 7:40 | M   | BGB | Backing the baby to perform ablution                  |                |  |
| 7:45 | F   |     | Bought rice (jollof) for me                           |                |  |
|      | M   | BGB | Gave some portion of the rice to the child            |                |  |
| 7:50 | BGB | BGB | Eating the rice                                       |                |  |
| 7:50 | M   | F   | Serving the husband kunu and kosai                    |                |  |
|      | ML  | FL  |                                                       |                |  |
| 7:55 | BGB | BGB | Eating jollof rice                                    |                |  |
| 8:00 | F   | BGB | Carrying the baby on his lap                          |                |  |
|      |     |     |                                                       |                |  |
|      |     |     |                                                       |                |  |
|      |     |     |                                                       |                |  |
|      |     |     |                                                       |                |  |
|      |     |     |                                                       |                |  |

Primary Questions (Complete after you complete data collection):

From what you have seen observing THIS HOUSEHOLD, please answer the following questions in detail:

| Question                                                                                                                                                      | Write your <u>detailed</u> response here                                                                                                                                                                                                                                                                                                                                                   |
|---------------------------------------------------------------------------------------------------------------------------------------------------------------|--------------------------------------------------------------------------------------------------------------------------------------------------------------------------------------------------------------------------------------------------------------------------------------------------------------------------------------------------------------------------------------------|
| <p>1. In this household, what would be the best way(s) to give nutritional supplements such as an MNP to young children to ensure compliance?</p> <p>Why?</p> | <p>The best way to give the MNP is through the mother and mother-in-law (grandmother).<br/>Also the father because he will ensure proper usage without over dosage</p> <p>Because the child is taken care of by both mother and grandmother.<br/>She is so close to both of them that she cries when any of them leave her side.</p>                                                       |
| <p>2. In this household, who is favored during meal preparation or feeding?</p> <p>How is this favoritism expressed?</p>                                      | <p>The child is the most favored during feeding. The mother is also favored.</p> <p>Because she is served the meal first before any of the parent eats and she is being watched to eat before they eat.<br/>The mother is given different types of food when she is pregnant.</p>                                                                                                          |
| <p>3. How could we promote the MNP supplement for this family that would attract their attention?</p> <p>Who would they listen to?</p>                        | <p>The MNP supplement can be promoted by sensitizing both the father and the father-in-law (grandfather) and create good awareness of the product.</p> <p>The mother and grandmother will listen to the father and grandfather because women of this area are all answerable to their husbands and father-in-laws.<br/>Also, then father and grandfathers will listen to the community</p> |

|                                                                                                                                                               |                                                                                                                                                                                                                                                                                                                                                                        |
|---------------------------------------------------------------------------------------------------------------------------------------------------------------|------------------------------------------------------------------------------------------------------------------------------------------------------------------------------------------------------------------------------------------------------------------------------------------------------------------------------------------------------------------------|
|                                                                                                                                                               | <p>leaders because he stands for the law in the community.</p>                                                                                                                                                                                                                                                                                                         |
| <p>4. In this household, what would be the best ways to promote the MNP but limit how much it would be shared?</p> <p>Why?</p>                                | <p>There is little or no sharing in the household because the child is alone, although she is being visited by cousins and neighbors occasionally.</p> <p>It should be emphasized to mothers that it shouldn't be shared among other children and it should be considered as medicine maybe.</p>                                                                       |
| <p>5. What other issues and concerns did you see with this family that is important for us to consider with regard to introduction of an MNP?</p> <p>Why?</p> | <p>Lack of food, because the child was fed with kunu millet throughout the day and even the household visited, she was offered waina millet.</p> <p>Lack of proper hygiene; although the mother is trying to clean up but no proper measures was taken when the child was stooling and the farm animals were also drinking and eating from cooking pots and bowls.</p> |

|                                                                                                                                                                                                                        |                                                                                                                                                      |
|------------------------------------------------------------------------------------------------------------------------------------------------------------------------------------------------------------------------|------------------------------------------------------------------------------------------------------------------------------------------------------|
|                                                                                                                                                                                                                        |                                                                                                                                                      |
| <p>6. Based on your experience observing this child today, do you believe reactivity negatively impacted your ability to see the food-related behaviors of the child?</p> <p>Please explain your answer in detail.</p> | <p>No, it did not affect the work negatively.</p> <p>Because the child exhibits her mode and pattern of eating behavior without any obstruction.</p> |
