# Supplementary material for: Acceptance and compliance with micronutrient powder (MNP) among children aged 6–23 months in northern Nigeria
Source: PLOS journal article supplement (doi:10.1371/journal.pgph.0000961), 2022-10-17
Supplement: S8 (10.1371/journal.pgph.0000961.s008) [file journal.pgph.0000961.s008]

### 1.1.1 Instrument F –Direct Observation Form

#### <<Instrument F Direct Observation Form>>

**PI Name:** PragmaMathema,Stephen Kodish

**Study Title:** Formative research to develop an infant and young child feeding (IYCF) intervention with micronutrient powder (MNP) for children aged 6 – 23 months

**PI Version/Date:** Version1.0/January 24, 2015

Date: \_July 07, 2015\_\_\_\_\_Location: \_Ganye 1 community, LGA -Ganye

Data Collector: Antiya Sanda

Participant ID: A house near a well

Main goals of this direct observation are to answer the following questions:

1. In this household, what would be the best way(s) to give nutritional supplements to young children? Why?
2. In this household, describe the food sharing that you observe throughout the meal. Are there any predictable patterns?
3. In this household, who is favored and how is this favoritism expressed during meal preparation and eating?

(TEAR OFF AT PERFORATED DOTTED LINE BELOW)

-----

PARTICIPANT ID: \_\_\_\_

Household Composition Table (Fill out as you do data collection)

| INITIALS | SEX<br>(M/F) | AGE<br>(estimated) | Relationship to<br>household | Description                                               |
|----------|--------------|--------------------|------------------------------|-----------------------------------------------------------|
| TB       | F            | 30 YRS             | Mother                       | A tall black woman wearing a yellow.                      |
| SB       | F            | 7 MONTHS           | Child (observed<br>child)    | A small black baby.                                       |
| TP       | M            | 35 Yrs             | Father                       | A tall man wearing a purple shirt an ash<br>black blouse. |
| AB       | F            | 28 Yrs             | daughter                     | A small baby wearing a purple dress                       |
| SP       | F            | 2 Yrs              | Daughter                     | A little boy wearing a while and brown<br>shorts          |
| WB       | M            | 3 Yrs              |                              |                                                           |
|          |              |                    |                              |                                                           |
|          |              |                    |                              |                                                           |

|  |  |  |  |  |
|--|--|--|--|--|
|  |  |  |  |  |
|  |  |  |  |  |
|  |  |  |  |  |
|  |  |  |  |  |
|  |  |  |  |  |
|  |  |  |  |  |
|  |  |  |  |  |

PARTICIPANT ID: \_\_\_\_\_

| TIME | ACTOR INITIALS | RECIPIENT INITIALS | WHAT HAPPENED                  | FOOD        | Reactivity |
|------|----------------|--------------------|--------------------------------|-------------|------------|
| 8.00 | TB             |                    | Sweeping the house             |             |            |
| 8:05 | TB             | SB                 | Carry her child on the back    |             |            |
| 8:10 | TB             |                    | Sweeping the house             |             |            |
| 8:15 | TB             |                    | Sweeping                       |             |            |
| 8:20 | TB             |                    | Sweeping                       |             |            |
| 8:25 | TB             |                    | Brings out some plates to wash |             |            |
| 8:30 | TB             |                    | Fetching water                 |             |            |
| 8:35 | TB             |                    | Washing plates                 |             |            |
| 8:40 | TB             |                    | Washing the plates             |             |            |
| 8:45 | TB             |                    | Rinsing plates                 |             |            |
| 8:50 | TB             |                    | Rinsing the plates             |             |            |
| 8:55 | TB             |                    | Rinsing the plates             |             |            |
| 9:00 | TB             | SB                 | Breastfeeding                  | Breast milk |            |
| 9:05 | TB             | SB                 | Breastfeeding                  | Breast milk |            |
| 9:10 | TB             | SB                 | Breastfeeding                  | Breast milk |            |
| 9:15 | TB             | SB                 | Breastfeeding                  | Breast milk |            |
| 9:20 | TB             | SB                 | Breastfeeding                  | Breast      |            |

| TIME  | ACTOR INITIALS | RECIPIENT INITIALS | WHAT HAPPENED                                                              | FOOD | Reactivity |
|-------|----------------|--------------------|----------------------------------------------------------------------------|------|------------|
|       |                |                    |                                                                            | milk |            |
| 9:25  | TB             | SB                 | Carry her child on the back gives into room and bring baby's dirty clothes |      |            |
| 9:30  | TB             |                    | Goes into the room and bring baby dirty clothes                            |      |            |
| 9:35  | TB             |                    | Pour water into a big bucket                                               |      |            |
| 9:40  | TB             |                    | Bring detergent                                                            |      |            |
| 9:45  | TB             |                    | Start washing the baby clothes                                             |      |            |
| 9:50  | TB             |                    | Washing some clothes                                                       |      |            |
| 9:55  | TB             |                    | Washing some clothes                                                       |      |            |
| 10:00 | TB             |                    | Washing some clothes                                                       |      |            |
| 10:05 | TB             |                    | Start rinsing the clothes                                                  |      |            |
| 10:10 | TB             |                    | Rinsing the baby clothes                                                   |      |            |
| 10:15 | TB             |                    | Rinsing the baby clothes                                                   |      |            |
| 10:20 | TB             |                    | Spread clothes for drying                                                  |      |            |
| 10:25 | TB             |                    | Drying baby clothes                                                        |      |            |
| 10:30 | TB             |                    | Drying baby's clothes                                                      |      |            |
| 10:35 | TB             |                    | Pouring the dirty water outside                                            |      |            |
| 10:40 | TB             |                    | Bring back the bucket to keep                                              |      |            |
| 10:45 | TB             | SB                 | Goes into the room to lay her child                                        |      |            |
| 10:50 | SB             |                    | Sleeping                                                                   |      |            |
| 10:55 | SB             |                    | Sleeping                                                                   |      |            |
| 11:00 | SB             |                    | Sleeping                                                                   |      |            |
| 11:05 | SB             |                    | Sleeping                                                                   |      |            |
| 11:10 | SB             |                    | Sleeping                                                                   |      |            |
| 11:15 | SB             |                    | Sleeping                                                                   |      |            |
| 11:20 | SB             |                    | Sleeping                                                                   |      |            |
| 11:25 | SB             |                    | Sleeping                                                                   |      |            |
| 11:30 | SB             |                    | Sleeping                                                                   |      |            |
| 11:35 | SB             |                    | Sleeping                                                                   |      |            |
| 11:40 | SB             |                    | Sleeping                                                                   |      |            |
| 11:45 | SB             |                    | Sleeping                                                                   |      |            |
| 11:50 | TB             |                    | Fetches water into a bucket to                                             |      |            |

| TIME  | ACTOR INITIALS | RECIPIENT INITIALS | WHAT HAPPENED                                       | FOOD                | Reactivity |
|-------|----------------|--------------------|-----------------------------------------------------|---------------------|------------|
|       |                |                    | bath                                                |                     |            |
| 11:55 | TB             |                    | Bathing                                             |                     |            |
| 12:00 | TB             |                    | Bathing                                             |                     |            |
| 12:05 | TP             |                    | Walk into the house                                 |                     |            |
| 12:10 | TP             |                    | Speaks with the wife and leaves                     |                     |            |
| 12:15 | TB             |                    | Comes out of the room well dressed                  |                     |            |
| 12:20 | TB             |                    | Picks a bucket and begins to wash it                |                     |            |
| 12:25 | TB             |                    | Fetches water into the bucket                       |                     |            |
| 12:30 | TB             |                    | Start rinsing big water pot                         |                     |            |
| 12:35 | TB             |                    | Pick a bucket and goes to fetch water from the well |                     |            |
| 12:40 | TB             |                    | Fetching water from the well                        |                     |            |
| 12:45 | TB             |                    | Fetching water from the well                        |                     |            |
| 12:50 | TB             |                    | Fetching water from the well                        |                     |            |
| 1:00  | TB             |                    | Fetching water from the well                        |                     |            |
| 1:05  | TB             |                    | Fetching water from the well                        |                     |            |
| 1:10  | TB             |                    | Fetching water from the well                        |                     |            |
| 1:15  | TB             |                    | Start making fire                                   |                     |            |
| 1:20  | TB             |                    | Washing fresh pepper and fresh tomatoes             | Tomatoes and pepper |            |
| 1:21  | TB             |                    | Bring mortar                                        |                     |            |
| 1:22  | TB             |                    | Pour tomatoes and pepper into mortar                | Tomatoes and pepper |            |
| 1:23  | TB             |                    | Blowing fire                                        |                     |            |
| 1:24  | TB             |                    | Blowing the fire                                    | Tomato and pepper   |            |
| 1:25  | TB             |                    | Start pounding the tomatoes and peper               | Tomatoes and pepper |            |

| TIME | ACTOR INITIALS | RECIPIENT INITIALS | WHAT HAPPENED                           | FOOD                  | Reactivity |
|------|----------------|--------------------|-----------------------------------------|-----------------------|------------|
| 1:26 | TB             |                    | Pounding pepper and tomatoes            | Tomatoes and pepper   |            |
| 1:27 | TB             |                    | Pounding pepper and tomatoes            | Tomatoes and pepper   |            |
| 1:28 | TB             |                    | Pounding pepper and tomatoes            | Tomatoes and pepper   |            |
| 1:29 | TB             |                    | Pounding pepper and tomatoes            | Tomatoes and pepper   |            |
| 1:30 | TB             |                    | Pounding pepper and tomatoes            | Tomatoes and pepper   |            |
| 1:31 | TB             | SB                 | Carry baby on her arms                  |                       |            |
| 1:32 | TP             | SB                 | Collect the baby                        |                       |            |
| 1:34 | TB             |                    | Open the flask                          |                       |            |
| 1:35 | TB             |                    | Pour hot water into a small cup         | Water                 |            |
| 1:36 | TB             |                    | Bring the can of cerelac                | Cerelac               |            |
| 1:37 | TB             |                    | Take two spoonful of cerelac into a cup | Cerelac               |            |
| 1:38 | TB             |                    | Mixing cerelac with hot water           | Cerelac and hot water |            |
| 1:39 | TB             |                    | Stirring the cerelac and hot water      | Cerelac and hot water |            |
| 1:40 | TB             |                    | Still stirring it to make it cold       | Cerelac and water     |            |
| 1:41 | TB             |                    | Bring out packet of MNP                 | MNP                   |            |
| 1:42 | TB             |                    | Removed one sachet                      | MNP                   |            |
| 1:43 | TB             |                    | Take scissors                           |                       |            |
| 1:44 | TB             |                    | Cut the tip with scissors               | MNP                   |            |
| 1:45 | TB             |                    | Pour MNP into the cerelac and stirs it  |                       |            |
| 1:46 | TB             |                    | Drop empty sachet of MNP                |                       |            |

| TIME | ACTOR INITIALS | RECIPIENT INITIALS | WHAT HAPPENED                              | FOOD          | Reactivity |
|------|----------------|--------------------|--------------------------------------------|---------------|------------|
| 1:47 | TB             |                    | Stirring of MNP and cerelac                | MNP, cerelac  |            |
| 1:49 | TB             |                    | Use a spoon to taste the mixture           | MNP , cerelac |            |
| 1:50 | TB             | SB                 | Collects the baby from the father          |               |            |
| 1:51 | TB             | SB                 | Carry the baby on the lap                  |               |            |
| 1:52 | TB             | SB                 | Wears the baby a beep                      |               |            |
| 1:53 | TB             | SB                 | Start feeding the baby using a small spoon | MNP, Cerelac  |            |
| 1:54 | TB             |                    | Feeding the child                          | MNP, cerelac  |            |
| 1:55 | TB             |                    | Feeding the child                          | MNP, cerelac  |            |
| 1:56 | TB             |                    | Feeding the child                          | MNP, cerelac  |            |
| 1:57 | TB             |                    | Feeding the child                          | MNP, cerelac  |            |
| 1:58 | TB             |                    | Feeding the child                          | MNP, cerelac  |            |
| 1:59 | TB             |                    | Feeding the child                          | MNP, cerelac  |            |
| 2:00 | TB             |                    | Feeding the child                          | MNP, cerelac  |            |
| 2:01 | SB             |                    | Drink all cerelac mixed with MNP           |               |            |
| 2:02 | TB             |                    | Clean the child mouth with beep            |               |            |
| 2:05 | TB             | SB                 | Gives her child water to drink             |               |            |
| 2:10 | SB             |                    | Drinking the water slowly                  | Water         |            |
| 2:15 | Tb             | SB                 | Carry the child on the arm                 |               |            |
| 2:20 | TB             |                    | Picks a cup to fetch water                 |               |            |
| 2:25 | TB             |                    | Drinking water                             | Water         |            |
| 2:30 | TB             | SB                 | Piggy back her child                       |               |            |
| 2:31 | TB             |                    | Bring a spoon                              |               |            |

| TIME | ACTOR INITIALS | RECIPIENT INITIALS | WHAT HAPPENED                                                  | FOOD                           | Reactivity |
|------|----------------|--------------------|----------------------------------------------------------------|--------------------------------|------------|
| 2:32 | TB             |                    | Use spoon to fetch the pounded tomatoes from mortar into a pot | Tomatoes and pepper            |            |
| 2:34 | TB             |                    | Places the pot on fire                                         | Tomatoes and pepper            |            |
| 2:35 | TB             |                    | Sing hand fan to blow fire                                     |                                |            |
| 2:36 | TB             |                    | Bring palm oil in a bottle                                     | Palm oil                       |            |
| 2:37 | TB             |                    | Pour palm oil inside the pot of pepper on fire                 | Pepper, tomatoes and palm oil  |            |
| 2:38 | TB             |                    | Add little water into the mortar and stirs it                  | Water                          |            |
| 2:39 | TB             |                    | Pour the water from the mortar into a bowl                     |                                |            |
| 2:40 | TB             |                    | Adding magi star cube                                          | Seasoning                      |            |
| 2:41 | TB             |                    | Still unwrapping magi                                          | Seasoning                      |            |
| 2:42 | TB             |                    | Using hand fan to blow the fire                                |                                |            |
| 2:43 | TB             |                    | Uses a spoon to stir the pepper and and tomatoes on the fire   | Pepper and tomatoes , palm oil |            |
| 2:44 | TB             |                    | Sit and wait for it to fry                                     |                                |            |
| 2:45 | TB             |                    | Stirring                                                       |                                |            |
| 2:46 | TB             |                    | Covers the pot                                                 |                                |            |
| 2:47 | TB             |                    | Blowing fire                                                   |                                |            |
| 2:48 | TB             |                    | Re arranging firewood                                          |                                |            |
| 2:49 | TB             |                    | Opens pot and add little water                                 | Water                          |            |
| 2:50 | TB             |                    | Cover pot                                                      |                                |            |
| 2:51 | TB             |                    | Allow the stew to cook                                         | Tomatoes and pepper            |            |
| 2:52 | TB             |                    | Blow fire                                                      |                                |            |
| 2:53 | TB             |                    | Blow fire                                                      |                                |            |
| 2:54 | TB             |                    | Open the pot and leave it open                                 |                                |            |
| 2:55 | TB             |                    | Goes into the kitchen and spring                               | Spaghetti                      |            |

| TIME | ACTOR INITIALS | RECIPIENT INITIALS | WHAT HAPPENED                             | FOOD          | Reactivity |
|------|----------------|--------------------|-------------------------------------------|---------------|------------|
|      |                |                    | out spaghetti                             |               |            |
| 2:56 | TB             |                    | Open the packet of spaghetti              |               |            |
| 2:57 | TB             |                    | Break the strands into pieces             | Spaghetti     |            |
| 2:58 | TB             |                    | Pour spaghetti into the pot               | Spaghetti     |            |
| 2:59 | TB             |                    | Use spoon to stir the spaghetti           | Spaghetti     |            |
| 3:00 | TB             |                    | Drop the spoon on the plate               |               |            |
| 3:01 | TB             |                    | Cover the pot                             |               |            |
| 3:03 | TB             |                    | Fetch water to drink with a cup           | Water         |            |
| 3:04 | Tb             |                    | Drink water                               |               |            |
| 3:05 | TB             |                    | Open the pot on the fire                  |               |            |
| 3:06 | TB             |                    | Stirring spaghetti on fire                | Spaghetti     |            |
| 3:07 | TB             |                    | Leaves the pot open                       |               |            |
| 3:08 | TB             |                    | Add little salt                           | Salt          |            |
| 3:09 | TB             |                    | Add little water                          |               |            |
| 3:10 | TB             |                    | Cover the pot                             |               |            |
| 3:11 | TB             |                    | Start sweeping the kitchen                |               |            |
| 3:12 | TB             |                    | Sweeping the kitchen                      |               |            |
| 3:13 | TB             |                    | Pick a rag to open the pot on the fire    |               |            |
| 3:14 | TB             |                    | Bring down the pot of spaghetti from fire |               |            |
| 3:15 | TB             |                    | Puts another pot on the fire              |               |            |
| 3:16 | TB             |                    | Takes hot pot to the kitchen              |               |            |
| 3:17 | TB             |                    | Pick food warmer                          |               |            |
| 3:18 | TB             |                    | Serves food                               | spaghetti     |            |
| 3:19 | TP             |                    | Walk into the house                       |               |            |
| 3:20 | TB             | TP                 | Speaking with the wife                    |               |            |
| 3:21 | TB             |                    | Continues to serve the spaghetti          | Spaghatt<br>i |            |
| 3:22 | TB             |                    | Serving the spaghetti                     | Spaghatt<br>i |            |
| 3:23 | TB             |                    | Stop serving the spaghetti                |               |            |
| 3:24 | TB             |                    | Covering the food warmer and the plates   |               |            |
| 3:25 | TB             |                    | Pack all the plates into the room         |               |            |
| 3:30 | TP             |                    | Walk into the house                       |               |            |
| 3:35 | SB             |                    | Sleeping                                  |               |            |



| TIME | ACTOR INITIALS | RECIPIENT INITIALS | WHAT HAPPENED                                      | FOOD        | Reactivity |
|------|----------------|--------------------|----------------------------------------------------|-------------|------------|
|      |                |                    |                                                    |             |            |
| 3:40 | TB             |                    | Bring the food warmer out with a tray              |             |            |
| 3:45 | TB             |                    | Bring a flat plate and start serving the spaghetti | Spaghetti   |            |
| 3:50 | TB             |                    | Bring a spoon and water                            |             |            |
| 3:55 | TB,TP          |                    | Eating food together                               | Spaghetti   |            |
| 4:00 | TB,TP          |                    | Eating together                                    | Spaghetti   |            |
| 4:05 | TB,TP          |                    | Eating together                                    | Spaghetti   |            |
| 4:10 | TB,TP          |                    | Eating together                                    | Spaghetti   |            |
| 4:15 | TB             |                    | Drinking water                                     | Water       |            |
| 4:20 | TP             |                    | Drinking water                                     | Water       |            |
| 4:25 | TB,TP          |                    | Eating together                                    | Spaghetti   |            |
| 4:30 | TB,TP          |                    | Eating together                                    | Spaghetti   |            |
| 4:35 | TB,TP          |                    | Eating together                                    | Spaghetti   |            |
| 4:40 | TB,TP          |                    | Eating together                                    | Spaghetti   |            |
| 4:45 | TP             |                    | Walk out of the house                              |             |            |
| 4:50 | TB             |                    | Start packing all the plates to the kitchen        |             |            |
| 4:55 | TB             |                    | Clearing the plates                                |             |            |
| 5:00 | SB             |                    | Crying from the room                               |             |            |
| 5:05 | TB             | SB                 | Carry her child on the lap                         |             |            |
| 5:10 | TB             |                    | Uses ordinary water to wash hands                  |             |            |
| 5:15 | TB             | SB                 | Breastfeeding                                      | Breast milk |            |
| 5:20 | TB             | SB                 | Breastfeeding                                      | Breast milk |            |
| 5:25 | TB             | SB                 | Breastfeeding                                      | Breast milk |            |
| 5:30 | TB             | SB                 | Breastfeeding                                      | Breast milk |            |

| TIME | ACTOR INITIALS | RECIPIENT INITIALS | WHAT HAPPENED | FOOD        | Reactivity |
|------|----------------|--------------------|---------------|-------------|------------|
| 5:35 | TB             | SB                 | Breastfeeding | Breast milk |            |
| 5:40 | TB             | SB                 | Breastfeeding | Breast milk |            |
| 5:45 | TB             | SB                 | Breastfeeding | Breast milk |            |
| 5:50 | TB             | SB                 | Breastfeeding | Breast milk |            |
| 5:55 | TB             | SB                 | Breastfeeding | Breast milk |            |
| 6:00 | TB             | SB                 | Breastfeeding | Breast milk |            |

PARTICIPANT ID: \_\_

Primary Questions (Complete after you complete data collection):

From what you have seen observing THIS HOUSEHOLD, please answer the following questions in detail:

| Question                                                                                                                                                      | Write your <u>detailed</u> response here                                                                                                                                                                                                                                               |
|---------------------------------------------------------------------------------------------------------------------------------------------------------------|----------------------------------------------------------------------------------------------------------------------------------------------------------------------------------------------------------------------------------------------------------------------------------------|
| <p>1. In this household, what would be the best way(s) to give nutritional supplements such as an MNP to young children to ensure compliance?</p> <p>Why?</p> | <p>The best way and time to give the MNP should be in the afternoon because that is when children are fed with semi solid food and the child is already used to the system.</p> <p>Because this young child sleeps throughout in the morning and wakes up hungry in the afternoon.</p> |
| <p>2. In this household, who is favored during meal preparation or feeding?</p> <p>How is this favoritism expressed?</p>                                      | <p>The male and female caregivers are favoured during meal preparation.</p> <p>They are served the first and foremost before anyone else. They also served the largest portion in a nice and good food warmer.</p>                                                                     |
| <p>3. How could we promote the MNP supplement for this</p>                                                                                                    | <p>MNP can be promoted through the male and female caregiver.</p>                                                                                                                                                                                                                      |

|                                                                                                                                                                                                                        |                                                                                                                                                                                                                                                                                                                              |
|------------------------------------------------------------------------------------------------------------------------------------------------------------------------------------------------------------------------|------------------------------------------------------------------------------------------------------------------------------------------------------------------------------------------------------------------------------------------------------------------------------------------------------------------------------|
| <p>family that would attract their attention?</p> <p>Who would they listen to?</p>                                                                                                                                     | <p>The young child would listen to both the father and the mother, because he is used to having both parents at home at all time.</p>                                                                                                                                                                                        |
| <p>4. In this household, what would be the best ways to promote the MNP but limit how much it would be shared?</p> <p>Why?</p>                                                                                         | <p>The best way would be through the mother and father. The MNP may likely not be shared because this parents are educated and can follow the instructions stated on the pamphlet.</p> <p>The parents of this young child already know the basic of MNP and the usage , the tendency that it would be shared is minimal.</p> |
| <p>5. What other issues and concerns did you see with this family that are important for us to consider with regard to introduction of an MNP?</p> <p>Why?</p>                                                         | <p>There no concern or issues as far as this household is concern.</p> <p>The parents of this child work hand in hand and already knows how to maintain good hygiene for the child. The food availability in this household is stable.</p>                                                                                   |
| <p>6. Based on your experience observing this child today, do you believe reactivity negatively impacted your ability to see the food-related behaviors of the child?</p> <p>Please explain your answer in detail.</p> | <p>Reactivity did not affect my stay and observation process.</p> <p>There was no such thing like reactivity today. Because the parents are already used to having me around all day.</p>                                                                                                                                    |
