# Supplementary material for: Acceptance and compliance with micronutrient powder (MNP) among children aged 6–23 months in northern Nigeria
Source: PLOS journal article supplement (doi:10.1371/journal.pgph.0000961), 2022-10-17
Supplement: S8 (10.1371/journal.pgph.0000961.s008) [file journal.pgph.0000961.s008]

### 1.1.1 Instrument F –Direct Observation Form

#### <<Instrument F Direct Observation Form>>

**PI Name:** PragmaMathema,Stephen Kodish

**Study Title:** Formative research to develop an infant and young child feeding (IYCF) intervention with micronutrient powder (MNP) for children aged 6 – 23 months

**PI Version/Date:** Version1.0/January 24, 2015

Date: \_July 12, 2015\_\_\_\_\_Location: \_purokayo community, LGA -Guyuk

Data Collector: Antiya Sanda

Participant ID: A house near a bar

Main goals of this direct observation are to answer the following questions:

1. In this household, what would be the best way(s) to give nutritional supplements to young children? Why?
2. In this household, describe the food sharing that you observe throughout the meal. Are there any predictable patterns?
3. In this household, who is favored and how is this favoritism expressed during meal preparation and eating?

(TEAR OFF AT PERFORATED DOTTED LINE BELOW)

-----

PARTICIPANT ID: \_\_\_\_

Household Composition Table (Fill out as you do data collection)

| INITIALS | SEX<br>(M/F) | AGE<br>(estimated) | Relationship to<br>household | Description                         |
|----------|--------------|--------------------|------------------------------|-------------------------------------|
| AH       | F            | 26 YRS             | Mother                       | A woman with average weight         |
| OM       | M            | 60 Yrs             | Father in law                | An old man in his late 60's         |
| TB       | M            | 8 Yrs              | Relation                     | A teenage boy                       |
| BG       | F            | 5 Yrs              | Relation                     | A black girl                        |
| YW       | F            | 30 Yrs             | Relation                     | A young woman wearing a black cloth |
| RT       | F            | 13 Yrs             | Younger sister               | A teenage girl wearing a red dress  |
| TB       | M            | 25 yrs             | Relation                     | A tall black man with no shirt on   |
| SM       | M            | 19 month           | Son                          | A small boy                         |
| SB       | F            | 45 years           | Mother in law                | A skinny black woman                |
|          |              |                    |                              |                                     |
|          |              |                    |                              |                                     |

|  |  |  |  |  |
|--|--|--|--|--|
|  |  |  |  |  |
|  |  |  |  |  |
|  |  |  |  |  |
|  |  |  |  |  |

PARTICIPANT ID: \_\_\_\_\_

| TIME | ACTOR INITIALS | RECIPIENT INITIALS | WHAT HAPPENED                             | FOOD | Reactivity |
|------|----------------|--------------------|-------------------------------------------|------|------------|
| 8.00 | Ah             |                    | Sweeping the house and corridor           |      |            |
| 8:05 | Ah             |                    | sweeping                                  |      |            |
| 8:10 | Ah             |                    | Sweeping the house                        |      |            |
| 8:15 | Ah             |                    | Sweeping                                  |      |            |
| 8:20 | Ah             |                    | Sweeping                                  |      |            |
| 8:25 | Ah             |                    | Sweeping                                  |      |            |
| 8:30 | Ah             |                    | Sweeping                                  |      |            |
| 8:35 | Ah             |                    | Start fetching water from a big water pot |      |            |
| 8:40 | Ah             |                    | fetching water from a big water pot       |      |            |
| 8:45 | Ah             |                    | Gather dirty plates                       |      |            |
| 8:50 | Ah             |                    | Gather dirty plates                       |      |            |
| 8:55 | Ah             |                    | Washing plates                            |      |            |
| 9:00 | Ah             |                    | Washing the plates                        |      |            |
| 9:05 | Ah             |                    | Washing the plates                        |      |            |
| 9:10 | Ah             |                    | Washing the plates                        |      |            |
| 9:15 | Ah             |                    | Washing the plates                        |      |            |
| 9:20 | Ah             |                    | Rinsing the plates                        |      |            |
| 9:25 | Ah             |                    | Rinsing the plates                        |      |            |
| 9:30 | Ah             |                    | Rinsing the plates                        |      |            |
| 9:35 | Ah             |                    | Washing cooking pots                      |      |            |
| 9:40 | Ah             |                    | washing pots                              |      |            |

| TIME  | ACTOR INITIALS | RECIPIENT INITIALS | WHAT HAPPENED                                    | FOOD                        | Reactivity |
|-------|----------------|--------------------|--------------------------------------------------|-----------------------------|------------|
| 9:45  | Ah             |                    | Washing pots with detergent and sand             |                             |            |
| 9:50  | Ah             |                    | Rinsing pots                                     |                             |            |
| 9:55  | Ah             |                    | Rinsing the pots                                 |                             |            |
| 10:00 | Ah             |                    | Gather firewood                                  |                             |            |
| 10:05 | Ah             |                    | Start making fire                                |                             |            |
| 10:10 | Ah             |                    | Making fire                                      |                             |            |
| 10:15 | Ah             |                    | Pick a small pot and pour water into it          | Water                       |            |
| 10:20 | Ah             |                    | Covers the pot and put it on fire                |                             |            |
| 10:25 | Ah             |                    | Bring a small bowl with guinea corn flour inside | Guinea corn                 |            |
| 10:30 | Ah             |                    | Bring out sieve                                  |                             |            |
| 10:35 | Ah             |                    | Sieving the guinea corn flour                    | Guinea corn                 |            |
| 10:40 | Ah             |                    | Sieving the guinea corn flour                    | Guinea corn                 |            |
| 10:45 | Ah             |                    | Sieving the guinea corn flour                    | Guinea corn                 |            |
| 10:50 | Ah             |                    | Continues Sieving the guinea corn flour          | Guinea corn                 |            |
| 10:55 | Ah             |                    | Check water on fire                              | Water                       |            |
| 11:00 | Ah             |                    | Poured little guinea corn flour into a bowl      | Guinea corn                 |            |
| 11:05 | Ah             |                    | Poured little water into it                      | Guinea corn and water       |            |
| 11:10 | Ah             |                    | Mixing of the flour and water                    | Guinea corn flour and water |            |
| 11:15 | Ah             |                    | Opens the pot on fire                            |                             |            |
| 11:20 | Ah             |                    | Poured the mixture into the boiling water        | Guinea corn and water       |            |
| 11:25 | Ah             |                    | Stirring to allow it to cook                     | Guinea corn flour           |            |
| 11:30 | Ah             |                    | Allow to cook                                    | Guinea corn                 |            |
| 11:35 | Ah             |                    | Remove pot from fire                             | Guinea                      |            |

| TIME  | ACTOR INITIALS | RECIPIENT INITIALS | WHAT HAPPENED                                                               | FOOD             | Reactivity |
|-------|----------------|--------------------|-----------------------------------------------------------------------------|------------------|------------|
|       |                |                    |                                                                             | corn             |            |
| 11:36 | Ah             |                    | Poured the kunu into cup                                                    | Guinea corn      |            |
| 11:37 | Ah             |                    | Use spoon to stir the kunu                                                  | Guinea corn      |            |
| 11:38 | Ah             |                    | Still stirring with spoon to make it cold                                   | Guinea corn      |            |
| 11:39 | Ah             |                    | Goes into the room to bring out MNP                                         |                  |            |
| 11:40 | Ah             |                    | Unseal the MNP                                                              |                  |            |
| 11:41 | Ah             |                    | Pour MNP into cup of kunu                                                   | Guinea corn, MNP |            |
| 11:42 | Ah             |                    | Stir with spoon to mix well                                                 | MNP, guinea corn |            |
| 11:43 | Ah             |                    | Stirring with small spoon                                                   | MNP, guinea corn |            |
| 11:44 | Ah             |                    | Taste the mixture with spoon                                                | MNP, guinea corn |            |
| 11:45 | Ah             | Sm                 | Carry her child on the lap                                                  |                  |            |
| 11:46 | Ah             | Sm                 | Start feeding the child with kunu mixed with MNP using a spoon and a cup    | MNP, guinea corn |            |
| 11:47 | Ah             | Sm                 | feeding the child with kunu mixed with MNP using a spoon and a cup          | MNP, guinea corn |            |
| 11:48 | Ah             | Sm                 | feeding the child with kunu mixed with MNP using a spoon and a cup          | MNP, guinea corn |            |
| 11:49 | Ah             | Sm                 | feeding the child with kunu mixed with MNP using a spoon and a cup          | MNP, guinea corn |            |
| 11:50 | Ah             | Sm                 | feeding the child with kunu mixed with MNP using a spoon and a cup          | MNP, guinea corn |            |
| 11:51 | Ah             | Sm                 | Continue feeding the child with kunu mixed with MNP using a spoon and a cup | MNP, guinea corn |            |

| TIME  | ACTOR INITIALS | RECIPIENT INITIALS | WHAT HAPPENED                                                               | FOOD             | Reactivity |
|-------|----------------|--------------------|-----------------------------------------------------------------------------|------------------|------------|
| 11:52 | Ah             | Sm                 | Continue feeding the child with kunu mixed with MNP using a spoon and a cup | MNP, guinea corn |            |
| 11:53 | Ah             | Sm                 | Continue feeding the child with kunu mixed with MNP using a spoon and a cup | MNP, guinea corn |            |
| 11:54 | Sm             |                    | Feed himself with cup alone                                                 |                  |            |
| 11:55 | Sm             |                    | Feeding himself with a small cup                                            | MNP, Guinea corn |            |
| 11:56 | Sm             |                    | Continues to feed himself with cup alone                                    | MNP, Guinea corn |            |
| 11:57 | Sm             |                    | Feeding himself with cup and playing at same time                           | MNP, Guinea corn |            |
| 11:59 | Sm             |                    | Finish the kunu                                                             |                  |            |
| 12:00 | Sm             |                    | Drop cup on the ground                                                      |                  |            |
| 12:05 | Ah             | Sm                 | Use water to clean his chest and body                                       |                  |            |
| 12:10 | Ah             | Sm                 | Clean the boy face with water                                               |                  |            |
| 12:15 | Ah             |                    | Wipe with face with a small towel                                           |                  |            |
| 12:20 | Ah             | Sm                 | Clean his face with water                                                   |                  |            |
| 12:25 | Ah             |                    | Goes to the room and comes out with a shirt                                 |                  |            |
| 12:30 | Ah             | Sm                 | Start wearing shirt for the child                                           |                  |            |
| 12:35 | Ah             | Sm                 | Wearing a shirt for the child                                               |                  |            |
| 12:40 | Ah             |                    | Pick the empty cup of kunu and spoon                                        |                  |            |
| 12:45 | Ah             |                    | Start rinsing the cup and spoon with water                                  |                  |            |
| 12:55 | Ah             |                    | Takes cup and spoon to the kitchen                                          |                  |            |
| 1:00  | BG, Sm         |                    | Playing together                                                            |                  |            |
| 1:05  | BG, Sm         |                    | Playing together                                                            |                  |            |

| TIME | ACTOR INITIALS | RECIPIENT INITIALS | WHAT HAPPENED                                                | FOOD              | Reactivity |
|------|----------------|--------------------|--------------------------------------------------------------|-------------------|------------|
| 1:10 | BG, Sm         |                    | Playing together                                             |                   |            |
| 1:15 | Sm             |                    | Start sleeping                                               |                   |            |
| 1:20 | Sm             |                    | Sleeping on the mat in the compound                          | Cerelac and water |            |
| 1:25 | Sm             |                    | Sleeping                                                     |                   |            |
| 1:30 | Ah             | Sm                 | Carry the child into the room and covered him with a wrapper |                   |            |
| 1:35 | Sm             |                    | Sleeping                                                     |                   |            |
| 1:40 | Sm             |                    | Sleeping                                                     |                   |            |
| 1:45 | Sm             |                    | Sleeping                                                     |                   |            |
| 1:50 | Sm             |                    | Sleeping                                                     |                   |            |
| 1:55 | Sm             |                    | Sleeping                                                     |                   |            |
| 2:00 | Sm             |                    | Sleeping                                                     |                   |            |
| 2:05 | Sm             |                    | Sleeping                                                     |                   |            |
| 2:10 | Sm             |                    | Sleeping                                                     |                   |            |
| 2:15 | Sm             |                    | Sleeping                                                     |                   |            |
| 2:20 | Sm             |                    | Sleeping                                                     |                   |            |
| 2:25 | Sm             |                    | Sleeping                                                     |                   |            |
| 2:30 | Sm             |                    | Sleeping                                                     |                   |            |
| 2:35 | Ah             |                    | Start gathering the fire wood again                          |                   |            |
| 2:40 | Ah             |                    | Start blowing the fire                                       |                   |            |
| 2:45 | Ah             |                    | Fetches water in a pot and placed it on the fire             |                   |            |
| 2:50 | Ah             |                    | Bring out a big bowl of guinea corn flour and sieve          | Guinea corn flour |            |
| 2:55 | Ah             |                    | Sieving the guinea corn                                      | Guinea corn flour |            |
| 2:56 | Ah             |                    | Sieving the guinea corn                                      | Guinea corn flour |            |
| 2:57 | Ah             |                    | Sieving the guinea corn                                      | Guinea corn flour |            |
| 2:58 | Ah             |                    | Sieving the guinea corn                                      | Guinea corn flour |            |
| 2:59 | Ah             |                    | Sieving the guinea corn                                      | Guinea corn flour |            |
| 3:00 | Ah             |                    | Sieving the guinea corn                                      | Guinea            |            |

| TIME | ACTOR INITIALS | RECIPIENT INITIALS | WHAT HAPPENED                                              | FOOD              | Reactivity |
|------|----------------|--------------------|------------------------------------------------------------|-------------------|------------|
|      |                |                    |                                                            | corn flour        |            |
| 3:01 | Ah             |                    | Sieving the guinea corn                                    | Guinea corn flour |            |
| 3:02 | Ah             |                    | Sieving the guinea corn                                    | Guinea corn flour |            |
| 3:03 | TB             |                    | Blowing fire                                               |                   |            |
| 3:04 | TB             |                    | Fetches guinea corn flour and mix it water                 |                   |            |
| 3:05 | TB             |                    | Pour the mixture into the pot on fire                      |                   |            |
| 3:06 | TB             |                    | Stir with stick                                            | Guinea corn       |            |
| 3:07 | TB             |                    | Removes the stick and cover the pot                        |                   |            |
| 3:08 | TB             |                    | Bring out different plates from the kitchen                |                   |            |
| 3:09 | TB             |                    | Arrange the plates                                         |                   |            |
| 3:10 | TB             |                    | Pick a bowl                                                |                   |            |
| 3:11 | TB             |                    | Take a bowl of guinea corn                                 | Guinea corn       |            |
| 3:12 | TB             |                    | Opens the pot on the fire                                  |                   |            |
| 3:13 | TB             |                    | Add the guinea corn flour little by little                 |                   |            |
| 3:14 | TB             |                    | Uses a stick to stir the guinea corn flour and stir faster |                   |            |
| 3:15 | TB             |                    | Pour the remaining flour and stir faster                   | Guinea corn       |            |
| 3:16 | TB             |                    | Continues to stir the guinea corn flour                    |                   |            |
| 3:17 | TB             |                    | Stirring the guinea corn flour faster                      | Guinea corn flour |            |
| 3:18 | TB             |                    | Removes the stick and covers the pot                       | Guinea corn       |            |
| 3:19 | TB             |                    | Allows the tuwo to cook                                    | Guinea corn       |            |
| 3:20 | TB             |                    | Opens the pot and start serving tuwo                       | Guinea corn       |            |
| 3:21 | TB             |                    | Serving tuwo into different plates a                       |                   |            |

| TIME | ACTOR INITIALS | RECIPIENT INITIALS | WHAT HAPPENED                                        | FOOD        | Reactivity |
|------|----------------|--------------------|------------------------------------------------------|-------------|------------|
| 3:23 | TB             |                    | Serving tuwo                                         | Guinea corn |            |
| 3:24 | TB             |                    | Still serving tuwo                                   | Guinea corn |            |
| 3:25 | TB             |                    | Serving tuwo into 5 plates                           | Guinea corn |            |
| 3:26 | TB             |                    | Serves all the tuwo and pour water into the pot      |             |            |
| 3:27 | TB             |                    | Bring down the pot from the fire                     |             |            |
| 3:28 | TB             |                    | Start covering the plates with covers                |             |            |
| 3:29 | TB             |                    | Covering the plates                                  |             |            |
| 3:30 | TB             |                    | Start packing the plates to the kitchen              |             |            |
| 3:31 | TB             |                    | Packing all the plates to the kitchen                |             |            |
| 3:32 | Sm             |                    | Wakes up from sleep                                  |             |            |
| 3:33 | Sm             |                    | Uses a cup to fetch water from the pot               | Water       |            |
| 3:34 | Sm             |                    | Drinking water                                       | Water       |            |
| 3:36 | Sm             |                    | Drinking water                                       | water       |            |
| 3:37 | Sm             |                    | Drinking water                                       | water       |            |
| 3:38 | Sm             |                    | Drinking water                                       | water       |            |
| 3:39 | TB             |                    | Bring an already cooked pot of soup from the kitchen | Okro soup   |            |
| 3:40 | TB             |                    | Place the pot of soup on the fire                    | Okro        |            |
| 3:41 | TB             |                    | Opens the pot of soup                                | Okro        |            |
| 3:42 | TB             |                    | Use spoon to stir the soup                           | Okro        |            |
| 3:43 |                |                    | Stirring the soup                                    |             |            |
| 3:44 | TB             |                    | Taste soup with spoon                                | Okro        |            |
| 3:45 | TB             |                    | Tasting the soup                                     | Okro        |            |
| 3:46 | TB             |                    | Taste the soup                                       | Okro        |            |
| 3:47 | TB             |                    | Covers the pot of soup                               | Okro        |            |
| 3:48 | TB             |                    | Start serving the soup into small bowls              | Okro soup   |            |
| 3:49 | TB             |                    | Serving soup                                         | Okro soup   |            |
| 3:50 | TB             |                    | Serving soup                                         |             |            |
| 3:51 | TB             |                    | Covers the pot of soup and takes it to the room      | Okro soup   |            |
| 3:52 | BG             |                    | Packing soup bowls                                   | Okro        |            |



| TIME | ACTOR INITIALS | RECIPIENT INITIALS | WHAT HAPPENED                                  | FOOD                      | Reactivity |
|------|----------------|--------------------|------------------------------------------------|---------------------------|------------|
|      |                |                    |                                                | soup                      |            |
| 3:53 | BG             |                    | Packing soup bowls                             |                           |            |
| 3:54 | BG             |                    | Carry food and soup to the mat                 |                           |            |
| 3:55 | Sm             |                    | Sit on the mat                                 |                           |            |
| 3:56 | BG             |                    | Washing her hands with water                   |                           |            |
| 3:57 | BG             | SM                 | Washing hand of the child with just water      |                           |            |
| 3:58 | BG             | Sm                 | Washing hands                                  |                           |            |
| 3:59 | BG             | Sm                 | Hand feeding the child with tuwo and okro soup | Okro soup, guinea corn    |            |
| 4:00 | BG             |                    | Feeding herself                                | Okro soup and guinea corn |            |
| 4:01 | BG             |                    | Feeding                                        |                           |            |
| 4:02 | BG             | Sm                 | Continues hand feeding the chuld               |                           |            |
| 4:03 | BG             | Sm                 | Feeding the baby                               |                           |            |
| 4:04 | BG             | Sm                 | Feeding the baby                               |                           |            |
| 4:05 | BG             |                    | Feeding herself                                |                           |            |
| 4:06 | BG             |                    | Feeding herself                                |                           |            |
| 4:07 | BG             | Sm                 | Feeding the baby                               |                           |            |
| 4:08 | BG             |                    | Continues feeding herself                      |                           |            |
| 4:09 | BG             | Sm                 | Gives the baby water to drink                  | Water                     |            |
| 4:10 | BG             | Sm                 | Gives the child water to drink                 | Water                     |            |
| 4:11 | Sm             |                    | Drinking water                                 | Water                     |            |

| TIME | ACTOR INITIALS | RECIPIENT INITIALS | WHAT HAPPENED                               | FOOD                    | Reactivity |
|------|----------------|--------------------|---------------------------------------------|-------------------------|------------|
| 4:12 | Sm             |                    | Drinking water                              |                         |            |
| 4:13 | BG             | Sm                 | Continues feeding the child                 |                         |            |
| 4:15 | Sm             |                    | Playing alone                               |                         |            |
| 4:20 | BG             |                    | Continues feeding herself                   |                         |            |
| 4:25 | BG             |                    | Feeding herself                             | Okro,<br>guinea<br>corn |            |
| 4:30 | BG             |                    | Feeding herself                             |                         |            |
| 4:35 | TB             | Sm                 | Removing his cloth                          |                         |            |
| 4:40 | TB             | Sm                 | Removing his cloth                          |                         |            |
| 4:45 | TB             |                    | Fetching water in a bucket                  |                         |            |
| 4:50 | TB             |                    | Fetching water                              |                         |            |
| 4:55 | TB             | Sm                 | Start bathing her child with soap and water |                         |            |
| 5:00 | TB             | Sm                 | Bathing her child                           |                         |            |
| 5:05 | TB             | Sm                 | Bathing her child                           |                         |            |
| 5:10 | TB             | Sm                 | Bathing her child                           |                         |            |
| 5:15 | TB             | Sm                 | Use wrapper to clean the face of the child  |                         |            |
| 5:25 | TB             | Sm                 | Applying Vaseline on the body of the child  |                         |            |
| 5:30 | TB             | Sm                 | Rubbing Vaseline                            |                         |            |
| 5:35 | TB             | Sm                 | Wears clothes for the child                 |                         |            |
| 5:40 | TB             | Sm                 | Wears her child a shirt and a trouser       |                         |            |
| 5:45 | TB             | Sm                 | Applying baby powder on the child neck      |                         |            |
| 5:50 | TB             | Sm                 | Brush his hair with hair brush              |                         |            |
| 5:55 | TB             | Sm                 | Wear rubber sandal for the child            |                         |            |
| 6:00 | TB             | Sm                 | Carry the child on her arm                  |                         |            |

PARTICIPANT ID: \_\_ \_\_\_\_\_

Primary Questions (Complete after you complete data collection):

From what you have seen observing THIS HOUSEHOLD, please answer the following questions in detail:

| Question                   | Write your <u>detailed</u> response here                       |
|----------------------------|----------------------------------------------------------------|
| 1. In this household, what | The best way and time to give the MNP should be in the morning |

|                                                                                                                                        |                                                                                                                                                                                                                                                                                                                                |
|----------------------------------------------------------------------------------------------------------------------------------------|--------------------------------------------------------------------------------------------------------------------------------------------------------------------------------------------------------------------------------------------------------------------------------------------------------------------------------|
| <p>would be the best way(s) to give nutritional supplements such as an MNP to young children to ensure compliance?</p> <p>Why?</p>     | <p>when child is hungry.</p> <p>Because the semi solid foods are usually prepared for young children in the morning.</p>                                                                                                                                                                                                       |
| <p>2. In this household, who is favored during meal preparation or feeding?</p> <p>How is this favoritism expressed?</p>               | <p>The young child is favoured during meal preparation and feeding.</p> <p>The young child is served first before anyone else and fed by his cousin sister until his satisfy.</p>                                                                                                                                              |
| <p>3. How could we promote the MNP supplement for this family that would attract their attention?</p> <p>Who would they listen to?</p> | <p>The best way to promote the MNP would be through the mother and the cousin sister since they both take part in the feeding of the child.</p> <p>They would listen to the mother and the cousin sister because they are always around and took part in the feeding practices and meal preparation for the entire family.</p> |
| <p>4. In this household, what would be the best ways to promote the MNP but limit how much it would be shared?</p> <p>Why?</p>         | <p>The best way to promote the MNP would be through the mother but the tendency that the MNP could be shared is very high because many people are living in this household.</p> <p>The relations that live in this household which include young and old could use the MNP for other children or mishandled the product.</p>   |

|                                                                                                                                                                                                                        |                                                                                                                                                                                                                                                                                                                                                                                                    |
|------------------------------------------------------------------------------------------------------------------------------------------------------------------------------------------------------------------------|----------------------------------------------------------------------------------------------------------------------------------------------------------------------------------------------------------------------------------------------------------------------------------------------------------------------------------------------------------------------------------------------------|
|                                                                                                                                                                                                                        |                                                                                                                                                                                                                                                                                                                                                                                                    |
| <p>5. What other issues and concerns did you see with this family that are important for us to consider with regard to introduction of an MNP?</p> <p>Why?</p>                                                         | <p>There no concern or issues in this household. However, when I was counting the remaining MNP I saw one was forcefully torn with teeth and it was left opened.</p> <p>This could be that other children in the household tried to taste the product and realized it was tasteless and left it opened. This shows that the mother did not properly keep the product out of reach of children.</p> |
| <p>6. Based on your experience observing this child today, do you believe reactivity negatively impacted your ability to see the food-related behaviors of the child?</p> <p>Please explain your answer in detail.</p> | <p>Reactivity did not affect my stay and observation process. They are use to having me around.</p> <p>There was no such thing like reactivity today. Because all the members of this household are already used to having me around all day.</p>                                                                                                                                                  |
