# Supplementary material for: Acceptance and compliance with micronutrient powder (MNP) among children aged 6–23 months in northern Nigeria
Source: PLOS journal article supplement (doi:10.1371/journal.pgph.0000961), 2022-10-17
Supplement: S8 (10.1371/journal.pgph.0000961.s008) [file journal.pgph.0000961.s008]

### 1.1.1 Instrument F –Direct Observation Form

#### <<Instrument F Direct Observation Form>>

**PI Name:** PragmaMathema,Stephen Kodish

**Study Title:** Formative research to develop an infant and young child feeding (IYCF) intervention with micronutrient powder (MNP) for children aged 6 – 23 months

**PI Version/Date:** Version1.0/January 24, 2015

Date: \_June 19, 2015\_\_\_\_\_ Location: \_\_Bolki community, Song LGA\_\_\_\_\_

Data Collector: Aisha Dahiru\_\_\_\_\_ Participant ID: \_\_Mud House with zinc Door\_\_\_\_\_

Main goals of this direct observation are to answer the following questions:

1. In this household, what would be the best way(s) to give nutritional supplements to young children? Why?
2. In this household, describe the food sharing that you observe throughout the meal. Are there any predictable patterns?
3. In this household, who is favored and how is this favoritism expressed during meal preparation and eating?

(TEAR OFF AT PERFORATED DOTTED LINE BELOW)

-----

PARTICIPANT ID: \_\_\_\_\_

Household Composition Table (Fill out as you do data collection)

| INITIALS | SEX (M/F) | AGE (estimated) | Relationship to household | Description                                         |
|----------|-----------|-----------------|---------------------------|-----------------------------------------------------|
| M        | F         | 27YRS           | Mother                    | Wearing a brown shirt and has facial mark.          |
| G        | F         | 17 MONTHS       | BABY GIRL                 | Wearing green dress                                 |
| B        | M         | 6 YEARS         | BOY                       | Wearing yellow checked shirt.                       |
| OG       | F         | 4 YEARS         | OLDER GIRL                | Wearing yellow checked shirt with green skirt       |
| GF       | F         | 5 YEARS         | OLDER GIRL FRIEND         | Wearing purple dress                                |
| MF       | F         | 29 YEARS        | MOTHER'S FRIEND           | Wearing brown wrapper with green shirt and head tie |

|  |  |  |  |  |
|--|--|--|--|--|
|  |  |  |  |  |
|  |  |  |  |  |
|  |  |  |  |  |
|  |  |  |  |  |
|  |  |  |  |  |
|  |  |  |  |  |
|  |  |  |  |  |
|  |  |  |  |  |
|  |  |  |  |  |

PARTICIPANT ID: \_\_\_\_\_

| TIME | ACTOR INITIALS | RECIPIENT INITIALS | WHAT HAPPENED          | FOOD | Reactivity |
|------|----------------|--------------------|------------------------|------|------------|
| 8:00 | M              |                    | Sweeping               |      |            |
| 8:05 | M              |                    | Sweeping               |      |            |
| 8:10 | M              |                    | Sweeping               |      |            |
| 8:15 | M              |                    | Washing utensils       |      |            |
| 8:20 | M              |                    | Washing utensils       |      |            |
| 8:25 | M              |                    | Washing utensils       |      |            |
| 8:30 | M              |                    | Washing utensils       |      |            |
| 8:35 | M              | G                  | Bathing the baby girl  |      |            |
| 8:40 | M              | G                  | Bathing the baby girl  |      |            |
| 8:45 | M              | G                  | Dressing the baby girl |      |            |

| TIME | ACTOR INITIALS | RECIPIENT INITIALS | WHAT HAPPENED                                                     | FOOD                          | Reactivity |
|------|----------------|--------------------|-------------------------------------------------------------------|-------------------------------|------------|
| 8:50 | M              |                    | Serving kunu from the flask into a cup                            | Kunu gyada (ground nut gruel) |            |
| 8:55 | M              |                    | Mixing MNP into a small portion of the kunu                       | Kunu gyada (ground nut gruel) |            |
| 8:56 | M              | G                  | Mother is feeding he baby with the portion of kunu mixed with mnp | Kunu gyada (ground nut gruel) |            |
| 8:57 | M              | G                  | Feeding the baby                                                  |                               |            |
| 8:58 | M              | B                  | Feeding the baby                                                  |                               |            |
| 8:59 | M              | B                  | Feeding the baby                                                  |                               |            |
| 9:00 | M              | B                  | Feeding the baby                                                  |                               |            |
| 9:01 | W              | B                  | Cleaning the baby mouth                                           |                               |            |
| 9:02 | M              | B                  | Picks hoes and a container                                        |                               |            |
| 9:03 | M              | B                  | Carrying the baby on her back                                     |                               |            |
| 9:04 | M              |                    | Going to the farm with the baby on her back                       |                               |            |
| 9:05 | M              | B                  | Place the baby on the ground                                      |                               |            |
| 9:10 | M              | B                  | Farming                                                           |                               |            |
| 9:15 | B              |                    | Playing on the farm                                               |                               |            |
| 9:20 | B              |                    | Playing                                                           |                               |            |
| 9:30 | M              | B                  | Breastfeeding the baby                                            |                               |            |

| TIME  | ACTOR INITIALS | RECIPIENT INITIALS | WHAT HAPPENED                                            | FOOD | Reactivity |
|-------|----------------|--------------------|----------------------------------------------------------|------|------------|
| 9:35  | M              | B                  | Breastfeeding the baby                                   |      |            |
| 9:40  | M              | B                  | Breastfeeding the baby                                   |      |            |
| 9:45  |                | B                  | Sleeping                                                 |      |            |
| 9:50  | M              | B                  | Lying baby on a wrapper in the farm                      |      |            |
| 9:55  | M              |                    | Farming                                                  |      |            |
| 10:00 | M              | G                  | Carrying baby on the back and carrying container on head |      |            |
| 10:05 | M              |                    | Walking home                                             |      |            |
| 10:10 | M              | G                  | Holding the baby                                         |      |            |
| 10:15 | B              |                    | Sleeping in mother's arms                                |      |            |
| 10:20 | M              | G                  | Lying baby on the mat                                    |      |            |
| 10:25 | M              | G                  | Loosening the baby's hair                                |      |            |
| 10:30 | M              | G                  | Loosening the baby's hair                                |      |            |
| 10:35 | M              | G                  | Rubbing oil in baby's hair                               |      |            |
| 10:40 | B              |                    | Boy sitting beside mother with his book                  |      |            |
| 10:45 | M              |                    | Plaiting the baby's hair                                 |      |            |
| 10:50 | M              |                    | Plaiting the baby's hair                                 |      |            |
| 10:55 | M              |                    | Plaiting the baby's hair                                 |      |            |
| 11:00 | M              |                    | Plaiting the baby's hair                                 |      |            |
| 11:05 | G              |                    | Sleeping                                                 |      |            |
| 11:10 | G              |                    | Baby Sleeping                                            |      |            |
| 11:15 | M              | G                  | Plaiting the baby's hair                                 |      |            |

| TIME  | ACTOR INITIALS | RECIPIENT INITIALS | WHAT HAPPENED                                                | FOOD | Reactivity |
|-------|----------------|--------------------|--------------------------------------------------------------|------|------------|
|       |                |                    |                                                              |      |            |
| 11:20 | B              |                    | Boy goes out chatting with his friends                       |      |            |
| 11:25 | G              |                    | Baby girl wakes up                                           |      |            |
| 11:30 | G              |                    | Baby girl lying on mothers lap                               |      |            |
| 11:31 | M              | B                  | Mother breastfeeding baby girl                               |      |            |
| 11:32 | M              | G                  | Mother breastfeeding baby girl                               |      |            |
| 11:33 | M              | G                  | Mother breastfeeding baby girl                               |      |            |
| 11:34 | M              | G                  | Mother breastfeeding baby girl                               |      |            |
| 11:35 | M              | G                  | Mother breastfeeding baby girl                               |      |            |
| 11:40 | M              | G                  | Mother breastfeeding baby girl                               |      |            |
| 11:45 | M              | G                  | Mother breastfeeding baby girl                               |      |            |
| 11:50 | G              |                    | Baby girl is playing                                         |      |            |
| 11:55 | M              |                    | Takes a bag to the kitchen                                   |      |            |
| 12:00 | M              |                    | Plucking leaves from a tree inside the house                 |      |            |
| 12:00 | G              |                    | Baby girl is playing with the leaves her mother was plucking |      |            |
| 12:00 | M              |                    | Mother feeds the sheep with the leaves plucked               |      |            |
| 12:05 | M              |                    | Mother looks on as the sheep eats the leaves                 |      |            |
| 12:05 | G              |                    | Baby girl playing around the sheep shade                     |      |            |
| 12:10 | G              |                    | Baby girl playing around the sheep shade                     |      |            |
| 12:10 | M              |                    | Cleaning the sheep shape                                     |      |            |
| 12:15 | M              |                    | Cleaning the sheep shape                                     |      |            |

| TIME  | ACTOR INITIALS | RECIPIENT INITIALS | WHAT HAPPENED                                       | FOOD          | Reactivity |
|-------|----------------|--------------------|-----------------------------------------------------|---------------|------------|
| 12:15 | G              |                    | Baby girl squatting to urinate near the sheep shade |               |            |
| 12:20 | M              | G                  | Washing the baby hands and foot                     |               |            |
| 12:25 | M              | G                  | Mother helps the baby wear her panties              |               |            |
| 12:30 | G              |                    | Baby girl playing around the house                  | R             |            |
| 12:50 | M              |                    | Baby girl playing around the house                  |               |            |
| 12:50 | G              |                    | Mother brings out vegetable                         | Sesame leaves |            |
| 12:55 | G              |                    | mOther cutting the Sesame leaves into a large bowl  | Sesame leaves |            |
| 01:00 | M              |                    | mother cutting the Sesame leaves into a large bowl  |               |            |
| 01:05 | G              |                    | Baby sits beside the mother                         |               |            |
| 01:10 | M              |                    | baby playing with the sesame leaves                 | Sesame leaves |            |
| 01:15 | B              |                    | Mother cutting the sesame leaves in a large bowl    | Sesame leaves |            |
| 01:20 | B              |                    | Playing with the sesame leaves                      |               |            |
| 01:25 | M              | G                  | Playing with the sesame leaves                      |               |            |
| 01:30 | M              | G                  | Mother Breastfeeding baby while cutting the leaves  |               |            |
| 01:35 | M              | G                  | Mother Breastfeeding baby                           |               |            |
| 01:40 | M              |                    | Mother goes into the kitchen to pick drying mat     |               |            |
| 01:45 | G              |                    | Baby follow the mother around the house             |               |            |
| 01:50 | M              |                    | Mother spreading the sesames leaves on the mat      |               |            |
| 01:55 | B              |                    | Baby playing with the leaves on the mat             |               |            |
| 02:00 | OG             |                    | Older girl comes back from school                   |               |            |
| 02:05 | OG             |                    | Older girl changes uniform and and                  |               |            |

| TIME  | ACTOR INITIALS | RECIPIENT INITIALS | WHAT HAPPENED                                              | FOOD        | Reactivity |
|-------|----------------|--------------------|------------------------------------------------------------|-------------|------------|
|       |                |                    | wear dress                                                 |             |            |
| 02:10 | M              |                    | Mother lying down under the shade with baby girl           |             |            |
| 02:15 | B              |                    | Boy joins mother and baby girl under the shade             |             |            |
| 02:20 | OG             |                    | Older girl washing her hands                               |             |            |
| 02:25 | OG             |                    | Older girl bring out food from the kitchen to shade        | Jollof rice |            |
| 02:30 | M              |                    | Mother serves kunu gyyada<br>Into a large bowl             | Kunu gyada  |            |
| 02:30 | M              |                    | Mother adding sugar to kunu                                | Kunu gyada  |            |
| 02:30 | M              |                    | Serving food in two separate bowls                         | Jollof rice |            |
| 02:31 | M              |                    | Gives a bowl to older girl and boy                         |             |            |
| 02:32 | OG             |                    | Eating together with boy                                   | Jollof rice |            |
| 02:33 | B              |                    | Eating together with older girl                            | Jollof rice |            |
| 02:34 | G              |                    | Eating with her hand from separate bowl                    | Jollof rice |            |
| 02:35 | G              |                    | Baby girl eating by herself from a separate bowl           | Jollof rice |            |
| 02:36 | G              |                    | Baby girl eating by herself from a separate bowl           | Jollof rice |            |
| 02:37 | M              | G                  | Baby girl protesting when the mother tries to feed her     |             |            |
| 02:38 | OG             | G                  | Baby girl protesting when the older girl tries to feed her |             |            |
| 02:39 | B              | G                  | Baby girl protesting as the boy tries to feed her          |             |            |
| 02:40 | G              |                    | Baby girl eating by herself from a separate bowl           |             |            |
| 02:41 | G              |                    | Baby girl eating by herself from a separate bowl           |             |            |
|       |                |                    |                                                            |             |            |
| 02:42 | G              |                    | Baby girl eating by herself from a separate bowl           |             |            |
| 02:43 | G              |                    | Baby girl eating by herself from a                         |             |            |

| TIME  | ACTOR INITIALS | RECIPIENT INITIALS | WHAT HAPPENED                                           | FOOD  | Reactivity |
|-------|----------------|--------------------|---------------------------------------------------------|-------|------------|
|       |                |                    | separate bowl                                           |       |            |
| 02:44 | G              |                    | Baby girl eating by herself from a separate bowl        |       |            |
| 02:45 | M              |                    | Mother serving kunu into separate cups                  |       |            |
| 02:46 | B              |                    | Drinking kunu from separate cup                         | Fish  |            |
| 02:47 | OG             |                    | Drinking kunu from separate cup                         |       |            |
| 02:48 | G              |                    | baby girl drinking kunu from separate cup by herself    |       |            |
| 02:49 | G              |                    | Mother serving kunu to older girl friend                |       |            |
| 02:50 | G              |                    | Crying over older girl friend cup of kunu               |       |            |
| 02:50 | M              |                    | Mother handing baby girl empty cup                      |       |            |
| 02:51 | G              |                    | Drinking kunu herself from separate cup                 |       |            |
| 02:52 | G              |                    | Older girl washing baby girl hands and mouth            |       |            |
| 02:53 | B              |                    | Washing his hands                                       |       |            |
| 02:54 | B              |                    | Washing his hands                                       |       |            |
| 02:55 | OG             |                    | Washing the dishes they just used                       | Water |            |
| 02:55 | B              |                    | Washing dishes                                          |       |            |
| 02:56 | G              | B                  | Playing with older boy and girl friend                  |       |            |
| 02:57 | G              | B                  | Walks out of the house                                  |       |            |
| 03:02 | G              |                    | Baby girl playing outside the house with other children |       |            |
| 03:07 | G              |                    | Baby girl playing outside the house with other children |       |            |
| 03:12 | G              |                    | Baby girl playing outside the house with other children |       |            |
| 03:17 | G              |                    | Baby girl playing outside the house with other children |       |            |
| 03:22 | G              |                    | Baby girl playing outside the house with other children |       |            |
| 03:32 | G              |                    | Baby girl playing outside the house with other children |       |            |
|       |                |                    |                                                         |       |            |



| TIME  | ACTOR INITIALS | RECIPIENT INITIALS | WHAT HAPPENED                                              | FOOD | Reactivity |
|-------|----------------|--------------------|------------------------------------------------------------|------|------------|
| 03:37 | G              |                    | Going back to the house                                    |      |            |
| 03:42 | G              | M                  | Baby girl playing with mother                              |      |            |
| 03:47 | M              | G                  | Mother giving baby water                                   |      |            |
| 03:57 | B              | M                  | Older brother playing with baby girl                       |      |            |
| 04:02 | M              | G                  | Breastfeeding baby girl                                    |      |            |
| 04:07 | G              | M                  | Mother breastfeeding the baby girl                         |      |            |
| 04:12 | M              | G                  | Boy lying down beside down beside mother under shade       |      |            |
| 04:17 | M              | G                  | Walking into the house                                     |      |            |
| 04:27 | G              |                    | Mother chatting with her friend                            |      |            |
| 04:27 | G              | B                  | Walk into the room to pick MNP sachet                      |      |            |
| 04:27 | B              |                    | Mother hands the MNP packet to her friend                  |      |            |
| 04:27 | G              | B                  | Mother chatting with her friend about MNP                  |      |            |
| 04:32 | B              |                    | Baby girl Playing with older boy                           |      |            |
| 04:37 | M              |                    | Mother chatting with her friend                            |      |            |
| 04:42 | M              |                    | Mother breast feed the girl while chatting with her friend |      |            |
| 04:47 | G              |                    | Baby girl lying down on mother                             |      |            |
| 04:47 | B              |                    | Older brother lying beside mother                          |      |            |
| 04:52 | M              | MF                 | Mother chatting with her friend                            |      |            |
| 04:57 | M              | MF                 | Mother chatting with her friend                            |      |            |
| 05:02 | MF             | M                  | Mother's friend bids her goodbye                           |      |            |
| 05:07 | M              | G                  | Mother bathing baby girl                                   |      |            |
| 05:12 | M              | G                  | Mother bathing baby girl                                   |      |            |
| 05:17 | M              | G                  | Mother bathing baby girl                                   |      |            |
| 05:22 | M              | G                  | Mother rubbing baby girl oil                               |      |            |
| 05:27 | M              | G                  | Mother dressing baby girl                                  |      |            |
| 05:32 | M              | G                  | Mother carrying her on her back                            |      |            |
| 05:37 | M              | G                  | Mother carrying her on her back                            |      |            |
| 05:42 | M              | G                  | Mother lying her down on the shade                         |      |            |
| 05:47 | M              |                    | Mother sweeping the compound                               |      |            |
| 05:52 | M              |                    | Mother sweeping the compound                               |      | R          |
| 05:57 | M              | G                  | Mother checking on the baby                                |      |            |
| 06:02 | M              |                    | Mother lying down beside the baby                          |      |            |
|       |                |                    |                                                            |      |            |

[illegible]

| TIME | ACTOR INITIALS | RECIPIENT INITIALS | WHAT HAPPENED | FOOD | Reactivity |
|------|----------------|--------------------|---------------|------|------------|
|      |                |                    |               |      |            |
|      |                |                    |               |      |            |
|      |                |                    |               |      |            |
|      |                |                    |               |      |            |
|      |                |                    |               |      |            |
|      |                |                    |               |      |            |
|      |                |                    |               |      |            |
|      |                |                    |               |      |            |
|      |                |                    |               |      |            |
|      |                |                    |               |      |            |

PARTICIPANT ID: \_\_Mud house with zinc door\_\_\_\_\_

Primary Questions (Complete after you complete data collection):

From what you have seen observing THIS HOUSEHOLD, please answer the following questions in detail:

| Question                                                                                                                                               | Write your <u>detailed</u> response here                                                                                                              |
|--------------------------------------------------------------------------------------------------------------------------------------------------------|-------------------------------------------------------------------------------------------------------------------------------------------------------|
| 1. In this household, what would be the best way(s) to give nutritional supplements such as an MNP to young children to ensure compliance?<br><br>Why? | The best way to ensure compliance is to educate the mother on MNP because she is the one taking care of the baby and feed the baby in a separate bowl |
| 2. In this household, who is favored during meal preparation or feeding?                                                                               | The older children Were favored during feeding .<br>The baby ate in a separate bowl                                                                   |

|                                                                                                                                        |                                                                                                                                                                                                                                                                                                                                                                                                                           |
|----------------------------------------------------------------------------------------------------------------------------------------|---------------------------------------------------------------------------------------------------------------------------------------------------------------------------------------------------------------------------------------------------------------------------------------------------------------------------------------------------------------------------------------------------------------------------|
| How is this favoritism expressed?                                                                                                      | The food was in solid state.                                                                                                                                                                                                                                                                                                                                                                                              |
| <p>3. How could we promote the MNP supplement for this family that would attract their attention?</p> <p>Who would they listen to?</p> | <p>MNP can be promoted to this family through the mother .</p> <p>The father ca also serve as an influence because he might be the one responsible for all decisions in the household .</p> <p>The religious leaders in the community can also have influence because the mother was discussing how their religious leader influenced acceptance of other products that were previously introduced into the community</p> |
| <p>4. In this household, what would be the best ways to promote the MNP but limit how much it would be shared?</p> <p>Why?</p>         | <p>The best way to limit the sharing of MNP is to ensure the mother understands that MNP is meant for children under 2 years and should be given to the child separately.</p>                                                                                                                                                                                                                                             |

|                                                                                                                                                                                                                        |                                                                                            |
|------------------------------------------------------------------------------------------------------------------------------------------------------------------------------------------------------------------------|--------------------------------------------------------------------------------------------|
| <p>5. What other issues and concerns did you see with this family that are important for us to consider with regard to introduction of an MNP?</p> <p>Why?</p>                                                         | <p>The young child was eating by herself. The food given to the young child was solid.</p> |
| <p>6. Based on your experience observing this child today, do you believe reactivity negatively impacted your ability to see the food-related behaviors of the child?</p> <p>Please explain your answer in detail.</p> | <p>Reactivity did not impact their food related behavior .</p>                             |
