# Supplementary material for: Acceptance and compliance with micronutrient powder (MNP) among children aged 6–23 months in northern Nigeria
Source: PLOS journal article supplement (doi:10.1371/journal.pgph.0000961), 2022-10-17
Supplement: S8 (10.1371/journal.pgph.0000961.s008) [file journal.pgph.0000961.s008]

## SPOT CHECK RECORDING FORM

State: Adamawa LGA: \_\_\_\_\_Song\_\_\_\_\_ Community: \_Bolki\_

Name of caregiver (female): Agnes Jokton

Name or caregiver (male): .....

Sex of index child: \_Female\_ Age of index child (in months): \_17 months\_\_\_\_\_

### Spot Check Information

1. Date of MNP distribution to household (circle option below based on LGA name above):

🚦 **Kebbi:** BirninKebbi&Jega LGA: **June 16**

🚦 **Kebbi:** Danko-wasagu: **June 17**

🚦 **Adamawa:**Song, Ganye: **(June 18)**

🚦 **Adamawa:**Guyuk **June 19**

2. Date of Spot Check Observation: \_\_\_\_\_2/7/2015\_\_\_\_\_

3. Number of sachets remaining(Ask the caregiver to show you and count the specific number of sachets remaining):

44

4. Number of sachets that should remainusing one MNP sachet per day (Analyst only):

47

5. Number of sachets remaining / number of sachets should be remaining(Analyst only):

\_\_\_\_\_44\_\_\_\_\_ / \_\_\_\_\_47\_\_\_\_\_ = \_\_\_\_\_93.6\_\_\_\_\_ %

## **Probes**

**Question 1.** You have **XX** MNP sachets remaining. Explain how easy or difficult it was to use the MNP product on a daily basis for your child 6 – 23 months? (Circle one answer)

**Very Difficult**

**Difficult**

**(Easy)**

**Very Easy**

**Question 2.** Describe any specific challenges that you faced that made the MNP difficult to use on a daily basis?

There was no challenge. In the beginning days I had to forcefully feed the child the kunu that is mixed with MNP but gradually she is used to it now and she asks for the kunu herself.

**Question 3.** Describe specific aspects of the MNP product that you or your child enjoyed that made it easier to use on a daily basis?

Since I started giving her MNP I noticed that she has added weight and has better appetite. She eats more than before. I also noticed that she is healthier and has not had any illness since then. Breastfeeding has increased also and she has so much energy.

**Question 4.** What questions do you have about the MNP based on your experience using it?

What should I do if I miss a day of administering the MNP?

**Question 5.** What specific recommendations do you have that we can do as a program to make the MNP easier to use on a daily basis?

The only recommendation is to bring more of this product to our community.
