# Supplementary material for: Acceptance and compliance with micronutrient powder (MNP) among children aged 6–23 months in northern Nigeria
Source: PLOS journal article supplement (doi:10.1371/journal.pgph.0000961), 2022-10-17
Supplement: S8 (10.1371/journal.pgph.0000961.s008) [file journal.pgph.0000961.s008]

### 1.1.1 Instrument F –Direct Observation Form

#### <<Instrument F Direct Observation Form>>

**PI Name:** PragmaMathema,Stephen Kodish

**Study Title:** Formative research to develop an infant and young child feeding (IYCF) intervention with micronutrient powder (MNP) for children aged 6 – 23 months

**PI Version/Date:** Version1.0/January 24, 2015

Date:06/07/15 Location: Rugga

Data Collector: Amina Duniya

Main goals of this direct observation are to answer the following questions:

1. In this household, what would be the best way(s) to give nutritional supplements to young children? Why?
2. In this household, describe the food sharing that you observe throughout the meal. Are there any predictable patterns?
3. In this household, who is favored and how is this favoritism expressed during meal preparation and eating?

Household Composition Table (Fill out as you do data collection)

| INITIALS | SEX<br>(M/F) | AGE<br>(estimated) | Relationship to<br>household | Description (not necessary)                                   |
|----------|--------------|--------------------|------------------------------|---------------------------------------------------------------|
| BM       | F            | 18years            | Mother of the baby           | Slim, dark in complexion, wearing beads on her neck and hands |
| BB       | M            | 12months           | Baby of the house            | Yellow top with no trouser, yellow in complexion              |
| GM       | F            | 50years            | Grandmother                  | Slim, light in complexion, wearing a green blouse and wrapper |
| SS       | M            | 3years             | Senior son in the house      | Light in complexion and wearing a blue kaftan top             |
| BF       | M            | 25years            | Baby's father                | Black kaftan, tall and light in complexion                    |
|          |              |                    |                              |                                                               |
|          |              |                    |                              |                                                               |
|          |              |                    |                              |                                                               |

| TIME  | ACTOR INITIALS | RECIPIENT INITIALS | WHAT HAPPENED                                           | FOOD        | Reactivity |
|-------|----------------|--------------------|---------------------------------------------------------|-------------|------------|
| 9:00  | BM             | BB                 | BB sleeping on her back                                 |             |            |
| 9:15  | BM             | BB                 | Gives him the MNP mixed with cold kunun gero (a sachet) | Kunun gero  |            |
| 9:30  | BM             | BB                 | Breast feeding BB                                       | Breast milk |            |
| 9:35  | BB             |                    | Playing on BM's lap                                     |             |            |
| 9:40  | BM             |                    | Making beads                                            |             |            |
| 9:50  | BM             |                    | Still making beads                                      |             |            |
|       | BB             |                    | Still playing                                           |             |            |
| 10:00 | BM             | BB                 | Breastfeeding the baby                                  | Breast milk |            |
| 10:05 | BM             | SS                 | Gives baby to SS to play with                           |             |            |
|       | BB             |                    | Refuses to stay with SS                                 |             |            |
|       | BM             |                    | Collects him back from SS                               |             |            |
| 10:10 | BB             | BM                 | Playing with BM                                         |             |            |
| 10:20 | BB             |                    | Still playing                                           |             |            |

| TIME  | ACTOR INITIALS | RECIPIENT INITIALS | WHAT HAPPENED                | FOOD        | Reactivity |
|-------|----------------|--------------------|------------------------------|-------------|------------|
|       |                |                    |                              |             |            |
| 10:27 | BB             |                    | Crying for food              |             |            |
| 10:30 | BM             | BB                 | Breastfeeding BB             | Breast milk |            |
| 10:40 | BB             |                    | Starts crying again          |             |            |
|       | BM             | BB                 | Breastfeeding baby           | Breast milk |            |
| 10:50 | BB             |                    | Still sucking                | Breast milk |            |
| 10:55 | BB             |                    | Sleeping                     |             |            |
| 11:00 | BB             |                    | Still sleeping               |             |            |
| 11:10 | BB             |                    | Still sleeping               |             |            |
| 11:15 | BB             |                    | Still sleeping               |             |            |
|       | BM             |                    | Making beads while BB sleeps |             |            |
| 11:20 | BB             |                    | Still sleeping               |             |            |
| 11:30 | BB             |                    | Still sleeping               |             |            |
| 11:40 | BB             |                    | Wakes up from sleep          |             |            |
|       | BB             |                    | Playing on the mat           |             |            |

| TIME  | ACTOR INITIALS | RECIPIENT INITIALS | WHAT HAPPENED                                        | FOOD        | Reactivity |
|-------|----------------|--------------------|------------------------------------------------------|-------------|------------|
|       | BM             |                    | Still making beads                                   |             |            |
| 11:45 | BB             |                    | Starts to cry                                        |             |            |
|       | BM             | BB                 | Breastfeeds BB                                       | Breast milk |            |
| 11:50 | BB             |                    | Finished sucking and starts to play                  |             |            |
|       | BM             | BB                 | Gives him kunu gero to drink                         | Kunun gero  |            |
| 11:55 | BM             | BB                 | Still feeding the baby                               | Kunun gero  |            |
|       | BB             |                    | Finished drinking kunu and starts to play on the mat | Kunun gero  |            |
| 12:00 | BB             |                    | Still playing                                        |             |            |
| 12:10 | BB             |                    | Still playing                                        |             |            |
| 12:20 | BB             |                    | Still playing                                        |             |            |
| 12:30 | BB             |                    | Still playing                                        |             |            |
| 12:40 | BB             |                    | Starts crying                                        |             |            |
|       | BM             | BB                 | Breast feeds him                                     | Breast milk |            |
|       | BB             |                    | playing                                              |             |            |
| 12:50 | BB             |                    | Still playing                                        |             |            |
|       | BM             | BB                 | Feeds him with kunun gero                            | Kunun gero  |            |

| TIME  | ACTOR INITIALS | RECIPIENT INITIALS | WHAT HAPPENED                      | FOOD        | Reactivity |
|-------|----------------|--------------------|------------------------------------|-------------|------------|
| 12:55 | BB             | SS                 | Playing with SS on the mat         |             |            |
| 1:00  | BB             |                    | Starts to cry                      |             |            |
|       | BM             |                    | Beast feeds BB                     |             |            |
|       | BB             |                    | Refuses to suck and begins to play |             |            |
| 1:10  | BB             |                    | Still playing                      |             |            |
|       | BM             |                    | Sleeping                           |             |            |
| 1:15  | BB             |                    | Still playing                      |             |            |
| 1:20  | BB             |                    | Still playing                      |             |            |
|       | BM             |                    | Still sleeping                     |             |            |
| 1:30  | BB             |                    | Still playing                      |             |            |
|       | BM             |                    | Still sleeping                     |             |            |
|       | BB             |                    | Starts crying                      |             |            |
|       | BM             | BB                 | Beast feeds BB                     | Breast milk |            |
| 1:35  | BB             |                    | Sucking and sleeping               | Breast milk |            |
| 1:40  | BB             |                    | sleeping                           |             |            |
|       | BM             |                    | sleeping                           |             |            |
| 1:50  | BB             |                    | Still sleeping                     |             |            |
| 2:00  | BB             |                    | Still sleeping                     |             |            |
|       | BM             |                    | Still sleeping                     |             |            |

| TIME | ACTOR INITIALS | RECIPIENT INITIALS | WHAT HAPPENED                                                                               | FOOD | Reactivity |
|------|----------------|--------------------|---------------------------------------------------------------------------------------------|------|------------|
|      |                |                    |                                                                                             |      |            |
| 2:10 | BB             |                    | Still sleeping                                                                              |      |            |
| 2:20 | BB             |                    | Still sleeping                                                                              |      |            |
|      | BM             |                    | Still sleeping                                                                              |      |            |
| 2:30 | BB             |                    | Still sleeping                                                                              |      |            |
| 2:40 | BB             |                    | Still sleeping                                                                              |      |            |
|      | BM             |                    | Still sleeping                                                                              |      |            |
| 2:48 | BB             | BM                 | Wakes up and starts to wake the mother                                                      |      |            |
|      | BM             | BB                 | Carries BB and puts him on he back                                                          |      |            |
| 2:55 | BM             |                    | Carries guinea corn from outside the house to the bedroom. BB is still strapped to her back |      |            |
| 3:05 | BM             |                    | Still fetching guinea corn with the baby strapped to her back                               |      |            |
| 3:10 | BM             |                    | Still fetching guinea corn with the baby strapped to her back                               |      |            |
| 3:20 | BM             |                    | Still fetching guinea corn with the baby strapped to her back                               |      |            |
| 3:25 | BM             |                    | Pounding guinea corn                                                                        |      |            |
| 3:35 | BM             |                    | Still fetching guinea corn with the baby strapped to her back                               |      |            |
| 3:45 | BM             |                    | Still fetching guinea corn with the baby strapped to her back                               |      |            |
| 3:50 | BM             |                    | Still fetching guinea corn with the baby strapped to her back                               |      |            |

| TIME | ACTOR INITIALS | RECIPIENT INITIALS | WHAT HAPPENED                                                                       | FOOD        | Reactivity |
|------|----------------|--------------------|-------------------------------------------------------------------------------------|-------------|------------|
| 3:55 | BM             | BB                 | Breast feeds baby                                                                   | Breast milk |            |
| 4:00 | BM             |                    | Sieves pounded guinea corn in other to remove the back with BB strapped to her back |             |            |
| 4:10 | BM             | BF                 | Hands BB to him to hold                                                             |             |            |
|      | BB             |                    | Refuses to stay with BF                                                             |             |            |
|      | BM             | BB                 | Collects him and breast feeds baby                                                  | Breast milk |            |
| 4:15 | BM             | BB                 | Finished feeding him and straps him to her back                                     |             |            |
| 4:20 | BM             |                    | Still pounding guinea corn                                                          |             |            |
| 4:30 | BM             |                    | Continued pounding guinea corn with baby strapped to her back                       |             |            |
| 4:40 | BM             |                    | Still pounding guinea corn                                                          |             |            |
|      | BB             |                    | Starts crying on her back                                                           |             |            |
| 4:45 | BM             | BB                 | Brings him down and breast feeds him                                                | Breast milk |            |
| 4:50 | BM             | BB                 | Finished breast feeding him and puts him down and continues pounding                |             |            |
| 4:55 | BB             |                    | Still playing on the floor                                                          |             |            |
|      | BM             |                    | Still pounding                                                                      |             |            |
| 5:00 | BB             |                    | Still playing                                                                       |             |            |
|      | BM             |                    | Still pounding                                                                      |             |            |

Primary Questions (Complete after you complete data collection):

From what you have seen observing THIS HOUSEHOLD, please answer the following questions in detail:

| Question                                                                                                                                                      | Write your <u>detailed</u> response here                                                                                                                                                                                                                                                                   |
|---------------------------------------------------------------------------------------------------------------------------------------------------------------|------------------------------------------------------------------------------------------------------------------------------------------------------------------------------------------------------------------------------------------------------------------------------------------------------------|
| <p>1. In this household, what would be the best way(s) to give nutritional supplements such as an MNP to young children to ensure compliance?</p> <p>Why?</p> | <p>The best way to give this product to ensure compliance is through the grandfather. He usually has the final say in the house. The grandmother too is very important because the mother of the child acts according to what she asks her to do and the grandmother takes order from the grand father</p> |
| <p>2. In this household, who is favored during meal preparation or feeding?</p> <p>How is this favoritism expressed?</p>                                      | <p>The baby because he is always with the mother and she feed her directly.</p>                                                                                                                                                                                                                            |
| <p>3. How could we promote the MNP supplement for this family that would attract their attention?</p> <p>Who would they listen to?</p>                        | <p>Through the grandfather who is is the practical head of the entire clan. Whatever he says holds</p>                                                                                                                                                                                                     |



|                                                                                                                                                                                                                        |                                                                                                                                                                                                                    |
|------------------------------------------------------------------------------------------------------------------------------------------------------------------------------------------------------------------------|--------------------------------------------------------------------------------------------------------------------------------------------------------------------------------------------------------------------|
| <p>4. In this household, what would be the best ways to promote the MNP but limit how much it would be shared?</p> <p>Why?</p>                                                                                         | <p>By educating the grandfather on the importance of the product to the child and what he stands to lose if it is shared with others</p> <p>I believe the grandfather is the person they all listen to</p>         |
| <p>5. What other issues and concerns did you see with this family that are important for us to consider with regard to introduction of an MNP?</p> <p>Why?</p>                                                         | <p>The mother feeds the baby with breast milk most of the time. The only supplementary feeding she does for him is with the kunun gero which is not often</p>                                                      |
| <p>6. Based on your experience observing this child today, do you believe reactivity negatively impacted your ability to see the food-related behaviors of the child?</p> <p>Please explain your answer in detail.</p> | <p>No, there was no reactivity that I noticed at all. The only thing I noticed was that the mother of the child does not take decisions on her own; it is the mother in-law (grandmother) that speaks for her.</p> |

|  |  |
|--|--|
|  |  |
|--|--|
