# Supplementary material for: Acceptance and compliance with micronutrient powder (MNP) among children aged 6–23 months in northern Nigeria
Source: PLOS journal article supplement (doi:10.1371/journal.pgph.0000961), 2022-10-17
Supplement: S8 (10.1371/journal.pgph.0000961.s008) [file journal.pgph.0000961.s008]

## SPOT CHECK RECORDING FORM

State: ADAMAWA LGA: GANYE Community:  
SUGU

NAME OF CAREGIVER.....MAGRET MOSES

Sex of index child: F Age of index child (in months):  
17

### Spot Check Information

1. Date of MNP distribution to household (circle option below based on LGA name above):

 **Kebbi:** BirninKebbi&Jega LGA: **June 16**

 **Kebbi:** Danko-wasagu: **June 17**

 **Adamawa:** Song, Ganye: **June 18**

 **Adamawa:** Guyuk **June 19**

2. Date of Spot Check Observation: 09-07-2015

3. Number of sachets remaining (Ask the caregiver to show you and count the specific number of sachets remaining):

53

4. Number of sachets that should remain using one MNP sachet per day (Analyst only):

40

5. Number of sachets remaining / number of sachets should be remaining (Analyst only):

53 / 40 = 132.5 %

### Probes

**Question 1.** You have **XX** MNP sachets remaining. Explain how easy or difficult it was to use the MNP product on a daily basis for your child 6 – 23 months? (Circle one answer)

**Very Difficult**

**Difficult**

**Easy**

**Very Easy**

**Question 2.** Describe any specific challenges that you faced that made the MNP difficult to use on a daily basis? THIS MY CHILD DOES NOT LIKE KUNU AT ALL.....SO I FIND IT DIFFICULT TO GIVE HER THE POWDER.....SOMETIMES I HAVE TO FORCE HER.....I GUESS SHE DOES NOT LIKE THE TASTE OF THE POWDER.

**Question 3.** Describe specific aspects of the MNP product that you or your child enjoyed that made it easier to use on a daily basis? FOR NOW THER IS NONE,THAT IS WHY YOU SHOULD HAVE NOTICE THAT THE MNP POWDER IS MUCH BECAUSE SHE IS REFUSING TO TAKE IT

**Question 4.** What questions do you have about the MNP based on your experience using it? APART FROM KUNU,CAN THIS MNP BE USED WITH ANY OTHER MEAL?

**Question 5.** What specific recommendations do you have that we can do as a program to make the MNP easier to use on a daily basis? THEY SHOULD MAKE THE MNP VERY SWEET IN TASTE.....IF POSSIBLE,THE MNP SHOULD BE IN FORM OF A SWEET(CANDY),SO THAT THE CHILD CAN LICK IT INSTEAD OF MIXING IT IN A FOOD.
