# Supplementary material for: Acceptance and compliance with micronutrient powder (MNP) among children aged 6–23 months in northern Nigeria
Source: PLOS journal article supplement (doi:10.1371/journal.pgph.0000961), 2022-10-17
Supplement: S8 (10.1371/journal.pgph.0000961.s008) [file journal.pgph.0000961.s008]

### 1.1.1 Instrument F –Direct Observation Form

#### <<Instrument F Direct Observation Form>>

**PI Name:** PragmaMathema,Stephen Kodish

**Study Title:** Formative research to develop an infant and young child feeding (IYCF) intervention with micronutrient powder (MNP) for children aged 6 – 23 months

**PI Version/Date:** Version1.0/January 24, 2015

Date:22/06/2015 Location:Hillinde

Data Collector: Samira Usman

Main goals of this direct observation are to answer the following questions:

1. In this household, what would be the best way(s) to give nutritional supplements to young children? Why?
2. In this household, describe the food sharing that you observe throughout the meal. Are there any predictable patterns?
3. In this household, who is favored and how is this favoritism expressed during meal preparation and eating?

Household Composition Table (Fill out as you do data collection)

| INITIALS | SEX (M/F) | AGE (estimated) | Relationship to household       | Description                                                  |
|----------|-----------|-----------------|---------------------------------|--------------------------------------------------------------|
| MM       | F         | 35yrs           | Mother                          | Orange wrapper blue head tie, tall and dark complexion       |
| BB       | M         | 17months        | Baby/son                        | Red shirt                                                    |
| SW       | F         | 25yrs           | Brothers wife                   | Blue and brown wrapper                                       |
| OW       | F         | 57yrs           | Second mother in-law            | Green and milk lace wrapper and head tie                     |
| MI       | F         | 59yrs           | Mother in-law                   | Ankara wrapper top and green head tie                        |
| SB       | M         | 4months         | Cousin to the baby am observing | Naked baby                                                   |
| DI       | F         | 16yrs           | Daughter in-law                 | Average height yellow and black Ankara wrapper, top head tie |
| FF       | F         | 45yrs           | Father                          | Tall, dark wearing milk shadda                               |
|          |           |                 |                                 |                                                              |

|     |   |       |                                            |                                                 |
|-----|---|-------|--------------------------------------------|-------------------------------------------------|
|     |   |       |                                            |                                                 |
| HDI | M | 20yrs | Husband of the daughter in-law (first son) | Green top and trousers (shadda) average height  |
| TB  | M | 15yrs | Son                                        | Young boy wearing black trousers and blue shirt |
| SB  | F | 8yrs  | son                                        | Brown shirt and black short                     |
| SG  | F | 6yrs  | Daughter                                   | Red skirt and blue short with brown cap         |
| SGS | F | 4yrs  | Daughter                                   | Green and black skirt with black pants          |
|     |   |       |                                            |                                                 |

| TIME | ACTOR INITIALS | RECIPIENT INITIALS | WHAT HAPPENED                                                    | FOOD        | Reactivity |
|------|----------------|--------------------|------------------------------------------------------------------|-------------|------------|
| 8:35 | MM             | BB                 | Mother breast feeding the baby                                   |             |            |
| 8:40 | BB             |                    | Baby playing                                                     |             |            |
| 8:45 | OW,MM,S<br>H   |                    | Removing groundnut back cover and putting the seed in a calabash | groundnut   |            |
| 8:50 | MM             | BB                 | Mother giving raw groundnut to the baby                          | groundnut   |            |
| 8:55 | MM             | BB                 | Mother giving water to the baby                                  | water       |            |
| 9:00 | MM             | BB                 | Mother breast feeding the baby                                   | Breast milk |            |
| 9:05 | MM             | BB                 | Mother breast feeding the baby                                   | Breast milk |            |
| 9:15 | BB             |                    | Baby playing with his mother                                     |             |            |
| 9:20 | MM             | BB                 | Baby sitting on his mother lap                                   |             |            |
| 9:25 | BB             |                    | Baby eating groundnut                                            |             |            |
| 9:30 | MM             | BB                 | Mother breast feeding the baby                                   | Breast milk |            |
| 9:35 | MM             | BB                 | Mother breast feeding the baby                                   | Breast milk |            |

| TIME  | ACTOR INITIALS   | RECIPIENT INITIALS | WHAT HAPPENED                                                                                       | FOOD                        | Reactivity |
|-------|------------------|--------------------|-----------------------------------------------------------------------------------------------------|-----------------------------|------------|
| 9:40  | MM               | BB                 | Still breast feeding                                                                                | Breast milk                 |            |
| 9:45  | BB               |                    | Baby is sleeping on his mother lap                                                                  |                             |            |
| 9:50  | BB               |                    | Still sleeping                                                                                      |                             |            |
| 9:55  | BB               |                    | sleeping                                                                                            |                             |            |
| 10:00 | MM               | BB                 | Mother sleeping with the baby                                                                       |                             |            |
| 10:05 | FF               |                    | Father coming back home with a hoe and a bag                                                        |                             |            |
| 10:10 | FF               |                    | Father going out with a bike with the hoe on his back                                               |                             |            |
| 10:15 | BB               |                    | Baby still sleeping                                                                                 |                             |            |
| 10:20 | MM               | BB                 | Mother breast feeding the baby                                                                      | Breast milk                 |            |
| 10:25 | MM               | BB                 | Breast feeding continue                                                                             | Breast milk                 |            |
| 10:30 | BB               |                    | Baby sleeping on his mother back                                                                    |                             |            |
| 10:35 | BB               |                    | sleeping                                                                                            |                             |            |
| 10:40 | BB               |                    | sleeping                                                                                            |                             |            |
| 10:45 | BB               |                    | Sleeping                                                                                            |                             |            |
| 10:50 | HDI              |                    | The husband of the daughter in-law came in to drop a hoe and a bag                                  |                             |            |
| 10:55 | BB               |                    | Baby still sleeping                                                                                 |                             |            |
| 11:00 | MM               | BB                 | Mother breast feeding the baby                                                                      | Breast milk                 |            |
| 11:05 | MM               | BB                 | Mother breast feeding the baby                                                                      | Breast milk                 |            |
| 11:10 | YB,<br>SB,SG,SGS |                    | The children came back with hoe and a bag.<br>They are eating tuwo dawa (sorghum) with dried baobab | Tuwon dawa with baobab soup |            |

| TIME                    | ACTOR INITIALS | RECIPIENT INITIALS | WHAT HAPPENED                                                                                                                                                                                                                                                                               | FOOD                                                              | Reactivity                                        |
|-------------------------|----------------|--------------------|---------------------------------------------------------------------------------------------------------------------------------------------------------------------------------------------------------------------------------------------------------------------------------------------|-------------------------------------------------------------------|---------------------------------------------------|
|                         |                |                    | soup. Young boy eating alone, the small girl with her sister eating together                                                                                                                                                                                                                |                                                                   |                                                   |
| 11:15                   | SG             | BB                 | The small girl is giving the baby the food                                                                                                                                                                                                                                                  | Tuwon dawa with baobab soup                                       |                                                   |
| 11:20                   | YB, FF         |                    | The oldest boy and the father went out                                                                                                                                                                                                                                                      |                                                                   |                                                   |
| 11:25                   | BB             |                    | The boy is eating tuwon dawa with baobab soup                                                                                                                                                                                                                                               | Tuwon dawa with baobab soup                                       |                                                   |
| 11:30                   | SG, SGS        |                    | The small girl went out to fetch water and her sister follow her                                                                                                                                                                                                                            |                                                                   |                                                   |
| 11:35                   | MM             | BB                 | The mother brought pap in a bowl, open the MNP and pours it into the pap, stir and give the baby. He didn't like the MNP, she gave he bowl the baby drank small and leave the remaining. The mother said let me keep it may be he just eat tuwo, he is not hungry. She now breast feed him. | Cold pap. The pap is semi solid but the baby couldn't finished it | She was looking at me while administering the MNP |
| 11:40                   | MM             | BB                 | Breast feeding continue                                                                                                                                                                                                                                                                     | Breast milk                                                       |                                                   |
| 11:45                   | BB, SGS        |                    | Baby playing with his sister                                                                                                                                                                                                                                                                |                                                                   |                                                   |
| 11:50                   | MM             |                    | Mother washing clothes                                                                                                                                                                                                                                                                      |                                                                   |                                                   |
| 11:55                   | DI             | BB                 | Daughter in-law backing the baby                                                                                                                                                                                                                                                            |                                                                   |                                                   |
| 12:00<br>12:05<br>12:10 | DI, SGS        | BB                 | The baby starts crying, she bring him and down and brought the bowl of pap in front of him and starts drinking it. The youngest daughter took the remaining and drank. The baby starts crying and the daughter in-law took him and back him then the                                        | Pap and MNP                                                       |                                                   |

| TIME  | ACTOR INITIALS | RECIPIENT INITIALS | WHAT HAPPENED                                                                                                                                                                            | FOOD           | Reactivity |
|-------|----------------|--------------------|------------------------------------------------------------------------------------------------------------------------------------------------------------------------------------------|----------------|------------|
|       |                |                    | mother came and take him from her and breast feed him                                                                                                                                    |                |            |
| 12:15 | BB             | MM                 | Baby playing with his mother                                                                                                                                                             |                |            |
| 12:20 | MM             | BB                 | Mother breast feeding the baby                                                                                                                                                           | Breast milk    |            |
| 12:25 | MM             | BB                 | Mother put the baby on her feet with his two legs open he started stooling. The mother washes his body and put dry sand on the stool, then uses iron shovel to pack it outside the fence |                |            |
| 12:30 | MM             | BB                 | Mother backing the baby                                                                                                                                                                  |                |            |
| 12:35 | MM             | BB                 | Mother breast feeding the baby and she is standing                                                                                                                                       |                |            |
| 12:40 | DI             |                    | Daughter in-law bring millet and starts pounding, washes the grain and removing the chaff and then put a little water into the grain and keep                                            |                |            |
| 12:50 | BB             |                    | The baby is playing                                                                                                                                                                      |                |            |
| 12:55 | BB,SBS         |                    | Baby playing with his sister                                                                                                                                                             |                |            |
| 1:00  | BB             |                    | Baby playing                                                                                                                                                                             |                |            |
| 1:05  |                |                    | Baby playing                                                                                                                                                                             |                |            |
| 1:10  |                |                    | Baby playing                                                                                                                                                                             |                |            |
| 1:15  | MM             | BB                 | Mother breast feeding the baby                                                                                                                                                           | Breast milk    |            |
| 1:20  | MM             | BB                 | Mother breast feeding the baby                                                                                                                                                           | Breast milk    |            |
| 1:25  | SGS, SG        |                    | The small girl and her sister are drinking pap together                                                                                                                                  | Semi solid pap |            |
| 1:30  | BB             |                    | Baby is playing with his sister                                                                                                                                                          |                |            |
| 1:35  | BB             |                    | Still playing                                                                                                                                                                            |                |            |

| TIME | ACTOR INITIALS | RECIPIENT INITIALS | WHAT HAPPENED                                                                                                                                                                                                                 | FOOD        | Reactivity |
|------|----------------|--------------------|-------------------------------------------------------------------------------------------------------------------------------------------------------------------------------------------------------------------------------|-------------|------------|
|      |                |                    |                                                                                                                                                                                                                               |             |            |
| 1:40 | BB,MM          | BB                 | Baby starts crying and the mother breast feed her                                                                                                                                                                             | Breast milk |            |
| 1:45 | MM             | BB                 | Breast feeding continue                                                                                                                                                                                                       |             |            |
| 1:50 | MM, SG         |                    | Mother and daughter are pounding maize, washed the maize with water to remove the chaff and put a little water into it (grain). The washed water of the maize and millet were add together for cow, sheep to drink in a bowl. |             |            |
| 2:00 | BB,DI,MM       |                    | Baby was crying and the daughter in-law gave him water and he continue crying and the mother breast feed him and back him                                                                                                     |             |            |
| 2:15 | SGS            |                    | The youngest daughter is drinking pap and the baby starts crying, the mother kept him and the sister with the pap bowl, he then starts drinking the pap                                                                       |             |            |
| 2:20 |                |                    | The baby and the sister are playing                                                                                                                                                                                           |             |            |
| 2:25 | DI             |                    | Daughter in-[law is pounding the grains (millet) until its turns to flour, sieve it, add water into the flour and pound again until it turn to paste then she put the paste in a calabash and keep                            |             |            |
| 2:35 | MM             | BB                 | The mother is breast feeding the baby                                                                                                                                                                                         |             |            |
| 2:40 | MM             | BB                 | The mother back the baby he starts crying, she then bring him down and breast feed him                                                                                                                                        |             |            |
| 2:45 | BB             |                    | Baby on his mother back                                                                                                                                                                                                       |             |            |
| 2:50 | BB             |                    | Baby sleeping on his mother back                                                                                                                                                                                              |             |            |
|      | MM             |                    | Mother and daughter are                                                                                                                                                                                                       |             |            |

| TIME | ACTOR INITIALS | RECIPIENT INITIALS | WHAT HAPPENED                                                                                                                                           | FOOD                | Reactivity                                         |
|------|----------------|--------------------|---------------------------------------------------------------------------------------------------------------------------------------------------------|---------------------|----------------------------------------------------|
| 2:55 |                |                    | separating the baobab leaves, removing the bigger leaves from the smaller ones                                                                          |                     |                                                    |
| 3:00 | BB             |                    | Baby sitting on the flour                                                                                                                               |                     |                                                    |
| 3:05 | BB             |                    | Sitting on the flour                                                                                                                                    |                     |                                                    |
| 3:10 | BB             |                    | Baby playing with the sister                                                                                                                            |                     |                                                    |
| 3:15 | SG             | BB                 | Sister giving the baby water                                                                                                                            | Water               |                                                    |
| 3:20 | BB             |                    | Baby playing with the sister                                                                                                                            |                     |                                                    |
| 3:25 | DI             | BB                 | Sister giving the baby water                                                                                                                            | Water               |                                                    |
| 3:30 | BB             |                    | Baby eating the millet paste                                                                                                                            | Millet paste        |                                                    |
| 3:35 | DI             | BB                 | Daughter in-law give the baby water                                                                                                                     | Water               |                                                    |
| 3:40 | DI             | BB                 | Daughter in-law add the paste to the baby                                                                                                               |                     |                                                    |
| 3:45 | DI             | BB                 | Daughter in-law washes his hand and carry him                                                                                                           |                     |                                                    |
| 3:50 | SG             | BB                 | The sister drank water and also gave the baby                                                                                                           | Water               |                                                    |
| 3:55 | MM             | BB                 | The baby sees the mother and starts crying, she took him and breast feed him                                                                            |                     |                                                    |
| 4:00 | MM             | BB                 | Mother breast feeding the baby                                                                                                                          | Breast milk         |                                                    |
| 4:05 | MM             | BB                 | Mother playing with the baby                                                                                                                            |                     |                                                    |
| 4:10 | SB             |                    | The small boy came in, took the bowl and fetch pap and drank                                                                                            | Cold semi solid pap |                                                    |
| 4:15 | BB             |                    | Baby is playing on the ground                                                                                                                           |                     |                                                    |
| 4:20 | FF             | BB                 | Father came in take the baby and said to me 'I hope you are managing with our house, you know we are villagers' enter the room and spent some times and |                     | The father came into the house because I was there |

| TIME | ACTOR INITIALS | RECIPIENT INITIALS | WHAT HAPPENED                                                                                                                                                   | FOOD         | Reactivity |
|------|----------------|--------------------|-----------------------------------------------------------------------------------------------------------------------------------------------------------------|--------------|------------|
|      |                |                    | went out                                                                                                                                                        |              |            |
| 4:25 | BB             |                    | The baby is playing on the ground                                                                                                                               |              |            |
| 4:30 | MM             | BB                 | The baby starts stooling and the mother took him and washes his body then back him. She then put sand on the stool and uses shovel to pack it outside the fence |              |            |
| 4:35 | MM             | BB                 | Mother breast feeding the baby                                                                                                                                  | Breast milk  |            |
| 4:40 | MM             | BB                 | Breast feeding continue                                                                                                                                         | Breast milk  |            |
| 4:45 | MM             | BB                 | Mother gives him millet paste on his hand and he eats                                                                                                           | Millet paste |            |
| 4:50 | MM             | BB                 | Mother gives the baby water from the kettle                                                                                                                     |              |            |
| 4:55 | MM             | BB                 | Mother breast feed the baby, the father came in and ask of water in a kettle, she now went on her knees and handed the kettle to him                            | Breast milk  |            |
| 5:00 | BB             |                    | Baby is playing with his sister                                                                                                                                 |              |            |
| 5:05 | MM             |                    | Mother setting the fire                                                                                                                                         |              |            |
| 5:10 | BB             |                    | Baby is crying                                                                                                                                                  |              |            |
| 5:15 | MM,SG          |                    | Mother sent her daughter to grind the maize they pounded earlier                                                                                                |              |            |
| 5:20 | MM             |                    | The mother wash the pot and add water, set the pot on fire and closed the pot                                                                                   |              |            |
| 5:25 | MM             | BB                 | Mother breast feeding the baby                                                                                                                                  | Breast milk  |            |
| 5:30 | BB             |                    | Baby playing                                                                                                                                                    |              |            |
| 5:35 | DI             |                    | Daughter in-law is washing the dishes                                                                                                                           |              |            |
| 5:40 | MM             | BB                 | Baby is crying following the                                                                                                                                    | Breast milk  |            |



| TIME | ACTOR INITIALS | RECIPIENT INITIALS | WHAT HAPPENED                                                                                                                                              | FOOD                                  | Reactivity |
|------|----------------|--------------------|------------------------------------------------------------------------------------------------------------------------------------------------------------|---------------------------------------|------------|
|      |                |                    | mother, the mother now took him and breast feed him while standing                                                                                         |                                       |            |
| 5:45 | BB             |                    | Baby playing                                                                                                                                               |                                       |            |
| 5:50 | MM             |                    | Mother takes small from the boiling pot and add water. She use the water to bath the baby                                                                  | Breast milk                           |            |
| 5:55 | MM             |                    | Mother sieving the grinding maize                                                                                                                          |                                       |            |
| 6:00 | MM             |                    | Mother took little from the maize flour, add cold water into the remaining stir it with her hand and pour into the boiling pot and stir, she close the pot |                                       |            |
| 6:05 | MM             |                    | The baby starts stooling on the ground, the mother took him wash his body and give him water                                                               |                                       |            |
| 6:10 | SG, SGS        |                    | The two sisters are drinking pap                                                                                                                           | Semi liquid cold pap made from millet |            |
| 6:15 | BB             |                    | Baby drinking pap                                                                                                                                          | Cold millet pap                       |            |
| 6:20 | MM             |                    | Mother setting fire and put a small pot on the fire then add water then close the pot                                                                      |                                       |            |
| 6:25 | MM             | BB                 | Baby starts following the mother and crying then the mother took him, give him water and breast feed him                                                   | water                                 |            |
| 6:30 | DI             |                    | Daughter in-law sleeping on the mat                                                                                                                        |                                       |            |
|      | MM             | BB                 | Mother breast feeding the baby                                                                                                                             | Breast milk                           |            |

Primary Questions (Complete after you complete data collection):

From what you have seen observing THIS HOUSEHOLD, please answer the following questions in detail:

| Question                                                                                                                                                           | Write your <u>detailed</u> response here                                                                                                                                                                                                                                                                                                                                                                   |
|--------------------------------------------------------------------------------------------------------------------------------------------------------------------|------------------------------------------------------------------------------------------------------------------------------------------------------------------------------------------------------------------------------------------------------------------------------------------------------------------------------------------------------------------------------------------------------------|
| <p>1. In this household, what would be the best way(s) to give nutritional supplements such as an MNP to young children to ensure compliance?</p> <p>Why?</p>      | <p>Is through the mother because the mother takes care of the children.</p> <p>Secondly, this household the daughter in-law help in taking care of the children especially the baby, she help her mother in-law in all the activities of the house including the meal preparation.</p>                                                                                                                     |
| <p>2. In this household, who is favored during meal preparation or feeding?</p> <p>How is this favoritism expressed?</p>                                           | <p>The baby is favoured because he is protected by his mother, sisters, father and the mother in-law, they give him whatever he wants</p>                                                                                                                                                                                                                                                                  |
| <p>3. How could we promote the MNP supplement for this family that would attract their attention?</p> <p>Who would they listen to?</p>                             | <p>Through the head of the house that is the father because he is in total control of the house. He provide for the family and they listen to him.</p> <p>The mother serve the husband, the moment he comes back she stop whatever she is doing and attend to him. He asked of water in the kettle she knelt down before giving him. She wished her husband well when he is going out.</p>                 |
| <p>4. In this household, what would be the best ways to promote the MNP but limit how much it would be shared?</p> <p>Why?</p>                                     | <p>Is through proper sensitization because from what I gathered they don't have proper/enough information, rules and regulation about the product because when the daughter took the remaining pap of MNP, the mother didn't stop her or show concern that the daughter is taking the MNP pap</p>                                                                                                          |
| <p>5. What other issues and concerns did you see with this family that are important for us to consider with regard to introduction of an MNP?</p> <p>Why?</p>     | <ol style="list-style-type: none"> <li>1. Hygiene, their room, surrounding, compound, dishes are very dirty, animals all over, animal faeces all over even in their kitchen. Chicken laying eggs under the bed in short the house is very dirty.</li> <li>2. Sharing of MNP</li> <li>3. Carelessness, because they allowed the goats to be eating their grains that was kept within their reach</li> </ol> |
| <p>6. Based on your experience observing this child today, do you believe reactivity negatively impacted your ability to see the food-related behaviors of the</p> | <p>Reactivity didn't impact negatively to my ability to see the food related behaviours of the child, because they relaxed and even tend to forget about my presence in the house. The only place was during MNP administration, they told me that they were told that a monitor will come to observe them, so I think this is the reason for the reactivity</p>                                           |

|                                                            |  |
|------------------------------------------------------------|--|
| <p>child?</p> <p>Please explain your answer in detail.</p> |  |
|------------------------------------------------------------|--|
