# Supplementary material for: Acceptance and compliance with micronutrient powder (MNP) among children aged 6–23 months in northern Nigeria
Source: PLOS journal article supplement (doi:10.1371/journal.pgph.0000961), 2022-10-17
Supplement: S8 (10.1371/journal.pgph.0000961.s008) [file journal.pgph.0000961.s008]

## SPOT CHECK RECORDING FORM

State: Adamawa LGA: \_\_\_\_\_ Song \_\_\_\_\_ Community: \_Galamba \_

Name of caregiver (female): Suratu Yusuf

Name or caregiver (male): .....

Sex of index child: \_female\_ Age of index child (in months): \_19 months\_\_\_\_\_

### Spot Check Information

1. Date of MNP distribution to household (circle option below based on LGA name above):

✚ Kebbi: BirninKebbi&Jega LGA: June 16

✚ Kebbi: Danko-wasagu: June 17

✚ Adamawa: Song, Ganye: (June 18)

✚ Adamawa: Guyuk June 19

2. Date of Spot Check Observation: \_\_\_\_\_4/7/2015\_\_\_\_\_

3. Number of sachets remaining (Ask the caregiver to show you and count the specific number of sachets remaining):

43

4. Number of sachets that should remain using one MNP sachet per day (Analyst only):

45

5. Number of sachets remaining / number of sachets should be remaining (Analyst only):

\_\_\_\_\_43\_\_\_\_\_ / \_\_\_\_\_45\_\_\_\_\_ = \_\_\_\_\_95.6\_\_\_\_\_ %

## **Probes**

**Question 1.** You have **XX** MNP sachets remaining. Explain how easy or difficult it was to use the MNP product on a daily basis for your child 6 – 23 months? (Circle one answer)

**Very Difficult**

**Difficult**

**(Easy)**

**(Very Easy )**

**Question 2.** Describe any specific challenges that you faced that made the MNP difficult to use on a daily basis?

- Increase in food consumption of the child.
- The child sleeps very often
- The MNP makes me to be conscious as a mother to feed my child on a daily basis unlike in the past.

**Question 3.** Describe specific aspects of the MNP product that you or your child enjoyed that made it easier to use on a daily basis?

- Does MNP prevent sickness?
- Can MNP be used with ordinary water?
- Can you explain to me about MNP?

**Question 4.** What questions do you have about the MNP based on your experience using it?

**NIL**

**Question 5.** What specific recommendations do you have that we can do as a program to make the MNP easier to use on a daily basis?

**NIL**
