# Supplementary material for: Acceptance and compliance with micronutrient powder (MNP) among children aged 6–23 months in northern Nigeria
Source: PLOS journal article supplement (doi:10.1371/journal.pgph.0000961), 2022-10-17
Supplement: S8 (10.1371/journal.pgph.0000961.s008) [file journal.pgph.0000961.s008]

### 1.1.1 Instrument F –Direct Observation Form

#### <<Instrument F Direct Observation Form>>

**PI Name:** PragmaMathema,Stephen Kodish

**Study Title:** Formative research to develop an infant and young child feeding (IYCF) intervention with micronutrient powder (MNP) for children aged 6 – 23 months

**PI Version/Date:** Version1.0/January 24, 2015

Date: 18/06/15 Location: Yamama Ketare

Data Collector: Samira Adama

Main goals of this direct observation are to answer the following questions:

1. In this household, what would be the best way(s) to give nutritional supplements to young children? Why?
2. In this household, describe the food sharing that you observe throughout the meal. Are there any predictable patterns?
3. In this household, who is favored and how is this favoritism expressed during meal preparation and eating?

Household Composition Table (Fill out as you do data collection)

| INITIALS | SEX (M/F) | AGE (estimated) | Relationship to household          | Description (not necessary)                                  |
|----------|-----------|-----------------|------------------------------------|--------------------------------------------------------------|
| SBB      | M         | 14 months       | Youngest child                     | Slim black boy without clothes                               |
| SBCY     | F         | 16 years        | Mother (2 <sup>nd</sup> wife)      | Slim and black with coffee brown and yellow wrapper          |
| SOG      | F         | 20 years        | Step mother (1 <sup>st</sup> wife) | Slim with orange and green wrapper                           |
| BGS      | M         | 8years          | Brother (2 <sup>nd</sup> child)    | Young boy with green shorts                                  |
| BLGS     | M         | 10years         | 1 <sup>st</sup> child              | Boy with light green shorts                                  |
| BGN      | F         | 17months        | Second young daughter              | Baby girl with no clothes                                    |
| YGP      | M         | 38years         | Husband                            | Tall man wearing green and peach trousers                    |
| PAG      | F         | 24years         | Neighbor                           | Slim dark lady wearing ash and green attire with green scarf |
| SBGU     | F         | 3years          | 4 <sup>th</sup> child              | Slim dark baby girl with unplaited hair                      |

|     |   |        |                       |                                         |
|-----|---|--------|-----------------------|-----------------------------------------|
| SCP | M | 6years | 3 <sup>rd</sup> child | Slim dark boy with cream colored pants. |
|     |   |        |                       |                                         |
|     |   |        |                       |                                         |

PARTICIPANT ID: \_\_\_\_\_

| TIME  | ACTOR INITIALS | RECIPIENT INITIALS | WHAT HAPPENED                                    | FOOD     | Reactivity              |
|-------|----------------|--------------------|--------------------------------------------------|----------|-------------------------|
| 10:35 | SBCY           |                    | Pounding grains                                  | Millet   |                         |
| 10:40 | SOG            |                    | Pounding grains                                  | Millet   |                         |
| 10:45 | SBB            |                    | Still pounding                                   | Millet   |                         |
| 10:50 | SBB            |                    | Eating biscuits                                  | Biscuits |                         |
| 10:55 | SBB            |                    | Lying down on the mat                            |          |                         |
| 11:00 | SBB            |                    | Eating biscuits again                            | Biscuits |                         |
| 11:05 | SBB            |                    | Still eating biscuits                            | Biscuits |                         |
| 11:10 | SLGS           |                    | Carrying bucket with grains                      |          |                         |
| 11:15 | BGS            |                    | Picking biscuits from the SBB without permission | Biscuits | Quickly taking biscuits |
| 11:20 | SOG & PAG      |                    | Pounding millet again                            | Millet   |                         |
| 11:45 | SBCY           |                    | Setting of fire                                  |          |                         |
| 11:50 | SBCY           |                    | Carrying a bucket to fetch water                 | water    | Fetching of water       |
| 11:55 | SBB            |                    | Started eating biscuits again                    |          |                         |
| 11:55 | SBCY           |                    | Carrying bucket of water                         |          |                         |
| 11:55 | SBCY           |                    | Washing of pot                                   |          |                         |
|       |                |                    |                                                  |          |                         |

| TIME  | ACTOR INITIALS | RECIPIENT INITIALS | WHAT HAPPENED                                    | FOOD        | Reactivity |
|-------|----------------|--------------------|--------------------------------------------------|-------------|------------|
|       |                |                    |                                                  |             |            |
| 11:57 | SBCY           |                    | Putting pot on fire with water                   |             |            |
| 12:00 | TGP            |                    | Carrying cutlass to farm                         |             |            |
| 12:05 | SBB            |                    | Eating biscuits                                  |             |            |
| 12:05 | SOG& PAG       |                    | Still pounding millet                            | Millet      |            |
| 12:05 | SBCY           |                    | Still pounding                                   | Millet      |            |
| 12:10 | SBCY           | SBB                | Feeding the baby                                 | Biscuit     |            |
| 12:10 | SBCY           | SBB                | Backing the baby                                 |             |            |
| 12:15 |                |                    | Pot on the fire                                  |             |            |
| 12:15 | SBCY           |                    | Still pounding                                   | Millet      |            |
| 12:20 | SBCY           |                    | Sieving millet with flour                        | Millet      |            |
| 12:20 | SBB            |                    | Crying                                           |             |            |
| 12:20 |                |                    | Breastfeeding the child                          | Breast milk |            |
| 12:25 | SBCY           | SBB                | Giving the baby water                            | water       |            |
| 12:30 |                |                    | Continued breastfeeding                          | Breast milk |            |
| 12:30 | SBCY           | SBB                | Backing the baby                                 |             |            |
| 12:35 | SBB            |                    | Backing the baby                                 |             |            |
| 12:35 | SBCY           |                    | Seiving millet and water, mixes it to form paste | Millet      |            |
| 12:40 | SBCY           |                    | Pounding the paste                               | Millet      |            |
| 12:40 | SBCY           |                    | Setting the fire again                           |             |            |

| TIME  | ACTOR INITIALS | RECIPIENT INITIALS | WHAT HAPPENED                        | FOOD   | Reactivity                 |
|-------|----------------|--------------------|--------------------------------------|--------|----------------------------|
|       |                |                    |                                      |        |                            |
| 12:40 | SBCY           |                    | Putting the pot on fire              |        |                            |
| 12:40 | SBCY           |                    | Pounding the paste again             | Millet |                            |
| 12:40 | SBB            |                    | Still lying on the mat               |        |                            |
| 12:40 | SBB            |                    | Baby vomiting                        |        |                            |
| 12:45 |                |                    | Molding millet into balls            | Millet |                            |
| 12:45 | SBCY           |                    | Pounding millet with water           | Millet |                            |
| 12:45 | SOG            |                    | Washing pots                         |        |                            |
| 12:45 | SBCY           |                    | Making millet into paste             | Millet |                            |
| 12:50 | SBB            |                    | Playing with sticks                  |        |                            |
| 12:50 | SBCY           |                    | Pounding millet again                | Millet |                            |
| 12:50 | SBCY           |                    | Molding millet into balls            | Millet |                            |
| 12:56 | SBB            |                    | Still playing with sticks            |        |                            |
| 12:57 | SBCY           |                    | Putting millet balls into pot        |        |                            |
| 1:00  | SBB            |                    | Playing with eating bowl             |        |                            |
|       | SBCY           |                    | Pounding and mixing flour            | Millet |                            |
| 1:05  | SBB            |                    | Still playing alone                  |        |                            |
| 1:10  | SBB            |                    | Crying while sitting                 |        |                            |
|       | SBCY           |                    | Stirring the millet balls in the pot |        |                            |
| 1:12  |                |                    | Preparing kunu for baby              | Millet |                            |
| 1:15  | SBCY           |                    | Opening MNP for the baby with        |        | Cutting and looking at the |

| TIME | ACTOR INITIALS | RECIPIENT INITIALS | WHAT HAPPENED                                       | FOOD        | Reactivity                            |
|------|----------------|--------------------|-----------------------------------------------------|-------------|---------------------------------------|
|      |                |                    | blade                                               |             | data collector                        |
|      | SBCY           |                    | Stirring the kunu to cool                           |             | Facing the data collector's direction |
| 1:20 | SBCY           | SBB                | Feeding the baby                                    | Breast milk |                                       |
| 1:25 | SBCY           |                    | Adding MNP in small portion of kunu                 | Millet      |                                       |
| 1:27 | SBCY           | SBB                | Feeding the baby kunu with MNP                      |             | Sitting close to me                   |
| 1:29 | SBCY           | SBB                | Forcing the child to finish it                      |             |                                       |
| 1:35 | SBB            |                    | Crying and crying on the mat                        |             |                                       |
| 1:40 | SBCY           |                    | Setting fire again                                  |             |                                       |
| 1:40 | SBB            |                    | Vomiting again                                      |             |                                       |
| 1:45 | SBCY           | SBB                | Giving the baby water                               |             |                                       |
| 1:50 | SBCY           | SBB                | Backing the baby                                    |             |                                       |
| 1:55 | SBB            |                    | Lying on the mat                                    |             |                                       |
| 2:00 | SBB            |                    | Eating biscuits and lying                           | Biscuits    |                                       |
| 2:05 | BGN            |                    | Sharing biscuits with SBB                           | Biscuits    |                                       |
| 2:10 | SBCY           | SBB                | Feeding the child                                   | Breast milk |                                       |
| 2:15 | SBCY           | SBB                | Feeding the child                                   | Breast milk |                                       |
| 2:20 | SBCY           |                    | Removing millet balls from boiling water in the pot |             |                                       |
|      |                |                    |                                                     |             |                                       |

| TIME | ACTOR INITIALS | RECIPIENT INITIALS | WHAT HAPPENED                            | FOOD        | Reactivity |
|------|----------------|--------------------|------------------------------------------|-------------|------------|
| 2:25 | SBB            |                    | Crying while lying down                  |             |            |
| 2:25 | SBCY           |                    | Pounding millet balls to make fura       | Millet      |            |
| 2:30 | SBCY           |                    | Still Pounding millet balls to make fura | Millet      |            |
| 2:30 | SBB            |                    | Lying down on mat                        |             |            |
| 2:35 | SBCY           |                    | Moulding the fura                        |             |            |
| 2:40 | TGP            |                    | Carrying a bucket                        |             |            |
| 2:45 | SBB            |                    | Crying on the mat                        |             |            |
| 2:50 | SBCY           | SBB                | Backing the baby                         |             |            |
| 2:55 | SOG & SBCY     |                    | Pounding sorghum                         | sorghum     |            |
| 3:00 | SBB            |                    | Eating kosai                             | Bean cake   |            |
| 3:05 | SBB            |                    | Eating kosai                             | Bean cake   |            |
| 3:10 | SBB            |                    | The baby is crying                       |             |            |
| 3:15 | SBCY           |                    | Feeding the baby                         | Breast milk |            |
| 3:20 | SBB            |                    | Lying on the mat                         |             |            |
| 3:25 | SBB            |                    | The baby is crying                       |             |            |
| 3:30 | SBCY           | SBB                | Feeding the baby                         | Breast milk |            |
| 3:35 | SBCY           | SBB                | Backing the baby                         |             |            |
| 3:40 | SBB            |                    | Taken along to fetch water               |             |            |
| 3:45 | SBB            |                    | Lying on the mat                         |             |            |
| 3:50 | SBCY           | SBB                | Feeding the baby                         | Breast milk |            |

| TIME | ACTOR INITIALS | RECIPIENT INITIALS | WHAT HAPPENED                | FOOD              | Reactivity |
|------|----------------|--------------------|------------------------------|-------------------|------------|
| 3:55 | SBCY           | SBB                | Feeding the baby             | Breast milk       |            |
| 4:00 | SBCY           | SBB                | Giving the baby water        |                   |            |
| 4:05 | SBB            |                    | Baby is sleeping             |                   |            |
| 4:10 | SBB            |                    | Baby is sleeping             |                   |            |
| 4:15 | SBB            |                    | Baby is sleeping             |                   |            |
| 4:20 | SBCY           |                    | Preparing fura with cow milk | Millet & cow milk |            |
| 4:25 | SBGU           | SBGU               | Feeding her with fura        |                   |            |
| 4:30 | SBB            |                    | Baby is sleeping             |                   |            |
| 4:35 | SBCY           |                    | Preparing fura with milk     |                   |            |
| 4:40 | SBB            |                    | Baby is sleeping             |                   |            |
| 4:40 | SBCY           |                    | Washing plates               |                   |            |
| 4:43 | SBCY           |                    | Adding water to furu         |                   |            |
| 4:48 | SBB            |                    | Baby is still sleeping       |                   |            |

|      |      |                           |                                                                  |         |  |
|------|------|---------------------------|------------------------------------------------------------------|---------|--|
| 4:53 | SBCY | SBB                       | Bathing the baby                                                 |         |  |
| 4:58 | SBCY | SBB                       | Feeding the baby                                                 | fura    |  |
| 5:03 | SBCY | SBB                       | Still feeding the baby                                           | fura    |  |
| 5:12 | SBCY | SBB                       | Rinsing the baby's body                                          |         |  |
| 5:17 | SOG  | BGS<br>SCP<br>SGBU<br>BGN | Sharing food among the children i.e SCP,SGBU AND BGN, separately | Sorghum |  |

|      |      |     |                                        |             |  |
|------|------|-----|----------------------------------------|-------------|--|
| 5:22 | SBCY | SBB | Feeding the baby                       | Breast milk |  |
| 5:27 | SBB  |     | Lying on SOG'S lap                     |             |  |
| 5:32 | SBB  | BGN | Playing with sister                    |             |  |
| 5:37 | SBB  | BGN | Playing with sister                    |             |  |
| 5:42 | SBB  | BGN | Eating Gwaben dawa from sister's plate | Gwaben dawa |  |
|      |      |     |                                        |             |  |
| 5:47 | SBB  | BGN | Feeding the baby                       | Breast milk |  |
| 5:52 | SBCY | SBB | Feeding the baby                       | breast milk |  |
| 5:57 | SBB  |     | Lying on the bed                       |             |  |
| 6:02 | SBB  |     | Stooling on the bed                    |             |  |
| 6:07 | SBB  |     | Vomiting again                         |             |  |
| 6:12 | SBCY | SBB | Backing the baby                       |             |  |
| 6:17 | SBB  |     | Crying on the cushion                  |             |  |
| 6:22 | SBCY | SBB | Feeding the child                      | breast milk |  |
| 6:27 | SBCY | SBB | Feeding the child                      | breast milk |  |
| 6:32 | SBB  |     | The child is sleeping                  |             |  |
| 6:37 | SBB  |     | The child is sleeping                  |             |  |
| 6:42 | SBB  |     | The child is sleeping                  |             |  |
|      |      |     |                                        |             |  |



|      |      |     |                                                                                                      |             |  |
|------|------|-----|------------------------------------------------------------------------------------------------------|-------------|--|
| 6:52 | SBB  |     | The child is sleeping                                                                                |             |  |
| 6:57 | SBB  |     | The child is sleeping                                                                                |             |  |
| 7:02 | SBB  |     | The child is sleeping                                                                                |             |  |
| 7:07 | SBB  |     | The child is sleeping                                                                                |             |  |
| 7:12 | SBB  |     | The child is sleeping                                                                                |             |  |
|      | SBCY |     | She is sharing the fura                                                                              |             |  |
|      | SOG  | BGN | Feeding her child                                                                                    |             |  |
| 7:19 | SBB  |     | Still sleeping on the bed                                                                            |             |  |
| 7:22 | SBB  |     | Still sleeping on the bed                                                                            |             |  |
|      | SBCY |     | Placing bucket and big storage bowls for storing water                                               |             |  |
| 7:27 | SBB  |     | The child is still sleeping                                                                          |             |  |
| 7:32 | SBB  |     | Started crying but still dozing off                                                                  |             |  |
| 7:37 | SBCY | SBB | Feeding the baby                                                                                     | Breast milk |  |
| 7:42 | SBCY | SBB | Feeding the baby<br>Giving the child water                                                           | Breast milk |  |
| 7:42 | SBB  |     | Went back and started sleeping again                                                                 |             |  |
| 7:47 | SBB  |     | The child is sleeping                                                                                |             |  |
| 7:52 | SBB  |     | The child is still sleeping<br>No action from other household members because it was raining heavily |             |  |
| 7:57 | SBB  |     | The child is still sleeping                                                                          |             |  |

[illegible]

[illegible]

[illegible]

[illegible]

[illegible]

[illegible]

[illegible]



[illegible]

[illegible]

|  |  |  |  |  |  |
|--|--|--|--|--|--|
|  |  |  |  |  |  |
|  |  |  |  |  |  |

Primary Questions (Complete after you complete data collection):

From what you have seen observing THIS HOUSEHOLD, please answer the following questions in detail:

| Question                                                                                                                                                      | Write your <u>detailed</u> response here                                                                                                                                                                                                    |
|---------------------------------------------------------------------------------------------------------------------------------------------------------------|---------------------------------------------------------------------------------------------------------------------------------------------------------------------------------------------------------------------------------------------|
| <p>1. In this household, what would be the best way(s) to give nutritional supplements such as an MNP to young children to ensure compliance?</p> <p>Why?</p> | <p>The best and proficient way to give the MNP is through then mothers.</p> <p>The child is so attached to the mother and she keeps curdling backing the baby. In essence, she would ensure proper administration and compliance.</p>       |
| <p>2. In this household, who is favored during meal preparation or feeding?</p> <p>How is this favoritism expressed?</p>                                      | <p>The child is the most favored and the children are also favored then the parents.</p> <p>The child is fed by the mother while she carries him on her laps and she ensures the baby feeds well to satisfaction before older children.</p> |
| <p>3. How could we promote the MNP supplement for this family that would attract their attention?</p>                                                         | <p>This MNP supplement for the family should be promoted.</p>                                                                                                                                                                               |

|                                                                                                                                                    |                                                                                                                                                                                                                  |
|----------------------------------------------------------------------------------------------------------------------------------------------------|------------------------------------------------------------------------------------------------------------------------------------------------------------------------------------------------------------------|
| <p>Who would they listen to?</p>                                                                                                                   | <p>The father because he is always coming home and keeps an eye on the wives about the kids. The wives are generally answerable to their husbands and they obey all commands given to them by their husbands</p> |
| <p>4. In this household, what would be the best ways to promote the MNP but limit how much it would be shared?</p> <p>Why?</p>                     | <p>Proper sensitization and creating awareness about the product to then mothers should be encouraged by the resource persons sharing although they do not have</p>                                              |
| <p>5. What other issues and concerns did you see with this family that are important for us to consider with regard to introduction of an MNP?</p> | <p>Lack of food is a challenge to the family and also lack of proper sensitization about the product.</p>                                                                                                        |

|                                                                                                                                                                                                                        |                                                                                                                                                                                                                                                             |
|------------------------------------------------------------------------------------------------------------------------------------------------------------------------------------------------------------------------|-------------------------------------------------------------------------------------------------------------------------------------------------------------------------------------------------------------------------------------------------------------|
| <p>Why?</p>                                                                                                                                                                                                            | <p>Because I observed, although being a special period (fasting), no attempt of cooking was made except the fura made and the children did not eat anything until the fura was prepared that was about 3:30pm</p>                                           |
| <p>6. Based on your experience observing this child today, do you believe reactivity negatively impacted your ability to see the food-related behaviors of the child?</p> <p>Please explain your answer in detail.</p> | <p>Not really, since the child was mostly fed by the mother and th other siblings fed on their own using separate bowls. But on the other hand, there was little food sharing between the child and the 2<sup>nd</sup> youngest child in the household.</p> |
