# Supplementary material for: Acceptance and compliance with micronutrient powder (MNP) among children aged 6–23 months in northern Nigeria
Source: PLOS journal article supplement (doi:10.1371/journal.pgph.0000961), 2022-10-17
Supplement: S8 (10.1371/journal.pgph.0000961.s008) [file journal.pgph.0000961.s008]

### 1.1.1 Instrument F –Direct Observation Form

#### <<Instrument F Direct Observation Form>>

**PI Name:** PragmaMathema,Stephen Kodish

**Study Title:** Formative research to develop an infant and young child feeding (IYCF) intervention with micronutrient powder (MNP) for children aged 6 – 23 months

**PI Version/Date:** Version1.0/January 24, 2015

Date: \_\_6/07/2015\_\_ Location: \_\_Sandoka community, Ganye\_\_

Data Collector: Antiya Sanda\_\_\_\_\_ Participant ID: A mud house near the forest \_\_\_\_

Main goals of this direct observation are to answer the following questions:

1. In this household, what would be the best way(s) to give nutritional supplements to young children? Why?
2. In this household, describe the food sharing that you observe throughout the meal. Are there any predictable patterns?
3. In this household, who is favored and how is this favoritism expressed during meal preparation and eating?

(TEAR OFF AT PERFORATED DOTTED LINE BELOW)

-----

PARTICIPANT ID: \_\_\_\_\_

Household Composition Table (Fill out as you do data collection)

| INITIALS | SEX<br>(M/F) | AGE<br>(estimated) | Relationship to<br>household | Description                                         |
|----------|--------------|--------------------|------------------------------|-----------------------------------------------------|
| SB       | M            | 9month             | child                        | A small boy                                         |
| ST       | F            | 32yrs              | mother                       | A slim tall woman                                   |
| TG       | F            | 16yrs              | daughter                     | A teenage girl wearing blue wrapper                 |
| BS       | F            | 8yrs               | daughter                     | A black slim girl with a loosed hair                |
| TB       | M            | 35yrs              | Father                       | A tall dark man wearing a black shirt and a trouser |
|          |              |                    |                              |                                                     |

|  |  |  |  |  |
|--|--|--|--|--|
|  |  |  |  |  |
|  |  |  |  |  |
|  |  |  |  |  |
|  |  |  |  |  |
|  |  |  |  |  |
|  |  |  |  |  |
|  |  |  |  |  |
|  |  |  |  |  |
|  |  |  |  |  |

PARTICIPANT ID: \_\_\_\_\_

| TIME  | ACTOR INITIALS | RECIPIENT INITIALS | WHAT HAPPENED | FOOD        | Reactivity |
|-------|----------------|--------------------|---------------|-------------|------------|
| 11:00 | ST             | SB                 | Breastfeeding | Breast milk |            |
| 11:05 | ST             | SB                 | Breastfeeding | Breast milk |            |
| 11:10 | ST             | SB                 | Breastfeeding | Breast milk |            |
| 11:15 | ST             | SB                 | Breastfeeding | Breast milk |            |
| 11:20 | ST             | SB                 | Breastfeeding | Breast milk |            |
| 11:25 | ST             | SB                 | Breastfeeding | Breast milk |            |
| 11:30 | SB             |                    | Sleeping      |             |            |
| 11:35 | SB             |                    | Sleeping      |             |            |
| 11:40 | SB             |                    | Sleeping      |             |            |
| 11:45 | SB             |                    | Sleeping      |             |            |

| TIME  | ACTOR INITIALS | RECIPIENT INITIALS | WHAT HAPPENED                                               | FOOD                  | Reactivity |
|-------|----------------|--------------------|-------------------------------------------------------------|-----------------------|------------|
|       |                |                    |                                                             |                       |            |
| 11:50 |                |                    | Sleeping                                                    |                       |            |
| 11:55 | ST             |                    | Start making fire                                           |                       |            |
| 12:00 | ST             |                    | Take a pot and fetch water                                  | water                 |            |
| 12:05 | ST             |                    | Put water on a fire                                         | water                 |            |
| 12:10 | ST             |                    | Bringing the cover of the pot to cover it                   | guinea corn           |            |
| 12:15 | ST             |                    | Washing her hands                                           |                       |            |
| 12:21 | ST             |                    | Come out of the kitchen with guinea corn flour              |                       |            |
| 12:22 | ST             |                    | Used her hand to mix the guinea corn flour with water       |                       |            |
| 12:23 | ST             |                    | Mixing guinea corn and water using her hand                 | Guinea corn and water |            |
| 12:24 | ST             |                    | Open the pot on fire to see if the water is boiling         |                       |            |
| 12:25 | ST             |                    | Start pouring the mixed guinea corn flour into the pot      | Guinea corn           |            |
| 12:30 | ST             |                    | Using the cup to stir the mix guinea corn flour on the fire |                       |            |
| 12:35 | ST             |                    | Bringing the pot down from the fire                         | guineacorn            |            |
| 12:40 | ST             |                    | Fetching the kunu inside a small cup                        | kunu                  |            |
| 12:45 | ST             |                    | Start pouring water into the empty pot                      | water                 |            |
| 12:50 | ST             |                    | In to the kitchen to bring spoon                            |                       |            |
| 12:55 | ST             |                    | Rinsing the spoon                                           |                       | R          |
| 12:56 | ST             |                    | Keep the cup of the kunu on a mat                           | kunu                  |            |
| 12:57 | ST             |                    | In to the room to bring the MNP                             | MNP                   |            |
| 12:58 | ST             |                    | Keep the MNP on a mat                                       | MNP                   |            |

| TIME  | ACTOR INITIALS | RECIPIENT INITIALS | WHAT HAPPENED                                                                    | FOOD         | Reactivity |
|-------|----------------|--------------------|----------------------------------------------------------------------------------|--------------|------------|
|       |                |                    |                                                                                  |              |            |
| 12:59 | ST             |                    | Carry the spoon of the kunu and start stirring it with the spoon to make it cold |              |            |
| 1:00  | ST             |                    | Allow the kunu to get cold                                                       | kunu         |            |
| 1:01  | ST             |                    | Allow the kunu to get cold                                                       | kunu         |            |
| 1:02  | ST             |                    | Used the spoon to tested the kunu                                                | kunu         |            |
| 1:03  | ST             |                    | Trying to unseal the MNP                                                         | MNP          |            |
| 1:05  | ST             |                    | Start pouring the MNP into the kunu                                              | kunu         |            |
| 1:06  | ST             |                    | Throws the empty scathed of the MNP                                              |              |            |
| 1:07  | ST             |                    | Start mixing the MNP with the kunu                                               | Kunu and MNP |            |
| 1:08  | ST             |                    | Mixing the kunu with the MNP                                                     | Kunu and MNP |            |
| 1:09  | ST             |                    | Mixing the kunu with the MNP                                                     |              |            |
| 1:10  | ST             |                    | Check the cup to see if the MNP has blended with kunu                            |              |            |
| 1:12  | ST             |                    | Use a spoon to taste the kunu mixed with MNP                                     | Kunu and MNP |            |
| 1:13  | ST             |                    | Feeding her child kunu using a small spoon                                       | kunu         |            |
| 1:15  | ST             | SB                 | The child is slowing                                                             | kunu         |            |
| 1:16  | ST             | SB                 | Feeding her child                                                                | kunu         |            |
| 1:17  | ST             | SB                 | Feeding her child                                                                | kunu         |            |
| 1:18  | ST             | SB                 | Feeding her child                                                                | kunu         |            |
| 1:19  | ST             | SB                 | Feeding her child                                                                | kunu         |            |
| 1:20  | ST             | SB                 | Feeding her child                                                                | kunu         |            |
| 1:25  | ST             | SB                 | Using water to clean the baby's                                                  |              |            |

| TIME | ACTOR INITIALS | RECIPIENT INITIALS | WHAT HAPPENED                                                           | FOOD        | Reactivity |
|------|----------------|--------------------|-------------------------------------------------------------------------|-------------|------------|
|      |                |                    | face                                                                    |             |            |
| 1:30 | ST             | SB                 | Check the cup to see if the child has drink all the kunu mixed with MNP |             |            |
| 1:35 | ST             |                    | Poured water into the cup of the kunu                                   |             |            |
| 1:40 | ST             | SB                 | Lays her child on the mat                                               |             |            |
| 1:45 | ST             |                    | Take the empty cup to wash                                              |             |            |
| 1:50 | ST             |                    | Using a soap to wash the empty cup                                      |             | R          |
| 1:55 | ST             | SB                 | Breast milk                                                             | Breast milk |            |
| 2:00 | ST             | SB                 | Breast milk                                                             | Breast milk |            |
| 2:05 | ST             | SB                 | Breast milk                                                             | Breast milk |            |
| 2:10 | ST             | SB                 | Breast milk                                                             | Breast milk |            |
| 2:15 | ST             | SB                 | Breast milk                                                             | Breast milk |            |
| 2:20 | ST             | SB                 | Breast milk                                                             | Breast milk |            |
| 2:25 | TG             |                    | Gather dirty plates to wash                                             |             |            |
| 2:30 | TG             |                    | Start fetching water to rinse the plates                                |             |            |
| 2:35 | TB             |                    | Washing dirty plates                                                    |             |            |
| 2:40 | BS,TG          |                    | BS have come out to join the sister to rinse the plates                 |             |            |
| 2:45 | BS,TG          |                    | Are washing the plate together                                          |             |            |
| 2:50 | TGBS,          |                    | Are washing the plates                                                  |             |            |
| 2:55 | TG             |                    | tuber of Bring out a yam from the kitchen                               | yam         |            |
| 3:00 | TG             |                    | Fetches water into a big pot                                            |             |            |

| TIME | ACTOR INITIALS | RECIPIENT INITIALS | WHAT HAPPENED                                                           | FOOD | Reactivity |
|------|----------------|--------------------|-------------------------------------------------------------------------|------|------------|
| 3:05 | TG             |                    | Start peeling the yam with knife                                        | yam  |            |
| 3:10 | TG             |                    | Peeling yam                                                             | yam  |            |
| 3:15 | TG             |                    | Start slicing the yam                                                   |      |            |
| 3:20 | TG             |                    | Slicing yam                                                             |      |            |
| 3:25 | TG             |                    | Empty the water from the yam and poured another water on the yam        |      |            |
| 3:30 | TG             |                    | Carry the pot of the yam and set it on firewood stand                   |      |            |
| 3:35 | TG             |                    | Bring the cover of the pot                                              |      |            |
| 3:40 | TG             |                    | Add salt in to the yam                                                  |      |            |
| 3:45 | TG             |                    | Start boiling on the fire                                               |      |            |
| 3:50 | TG             |                    | Sweeping the yam peels                                                  |      |            |
| 3:55 | TG             |                    | Come to site on the mat                                                 |      |            |
| 4:00 | ST             | BS                 | Combing her daughter her                                                |      |            |
| 4:05 | ST             | BS                 | Starts plaiting her child                                               |      |            |
| 4:10 | ST             | BS                 | plaiting her child                                                      |      |            |
| 4:15 | ST             | BS                 | plaiting her child                                                      |      |            |
| 4:20 | ST             | BS                 | plaiting her child                                                      |      |            |
| 4:25 | TG             |                    | Opens the pot on the fire to check the yam                              | yam  |            |
| 4:30 | TG             |                    | Uses her hand to pick up a yam from the fire to test if the yam is soft | yam  |            |
| 4:31 | TG             |                    | Cover the pot on the fire                                               |      |            |
| 4:32 | TG             |                    | Bringing down the pot from the fire                                     |      |            |

| TIME | ACTOR INITIALS | RECIPIENT INITIALS | WHAT HAPPENED                                     | FOOD             | Reactivity |
|------|----------------|--------------------|---------------------------------------------------|------------------|------------|
| 4:33 | TG             |                    | Start removing the fire wood                      |                  |            |
| 4:34 | BS             |                    | Bringing different plate near the pot             |                  |            |
| 4:35 | BS             |                    | Setting the plates                                |                  |            |
| 4:36 | TG             |                    | Start serving the yam into 3 plates               |                  |            |
| 4:37 | TG             |                    | Serving the yam                                   |                  |            |
| 4:38 | TG             |                    | Severs all the yam and cover the pot              |                  |            |
| 4:39 | TG             |                    | Bring a bottle of palm oil                        | Palm oil and yam |            |
| 4:40 | TG             |                    | Poured palm oil by the side of plate              | Palm oil and yam |            |
| 4:45 | BS             |                    | Start picking all the plate of yam to the kitchen | Palm oil and yam |            |
| 4:50 | BS             |                    | Keep one plate of yam with Oil on the met         | Palm oil and yam |            |
| 4:55 | BS,TG          |                    | Washing their hand with just water                | Palm oil and yam |            |
| 5:00 | BS,TG          |                    | Start eating yam with palm oil together           | Palm oil and yam |            |
| 5:05 | BS,TG          |                    | Are eating together                               | Palm oil and yam |            |
| 5:10 | SB             |                    | Playing all by himself                            |                  |            |
| 5:15 | BS,TG          |                    | Eating yam together                               | Palm oil and yam |            |

|      |    |    |                                |             |  |
|------|----|----|--------------------------------|-------------|--|
| 5:20 | ST | SB | Start breast feeding her child | Breast milk |  |
| 5:25 | ST | SB | breastfeeding                  | Breast milk |  |
| 5:30 | ST | SB | breastfeeding                  | Breast milk |  |
| 5:35 | ST | SB | breastfeeding                  | Breast milk |  |
| 5:40 | ST | SB | breastfeeding                  | Breast milk |  |

|      |       |    |                                                            |      |  |
|------|-------|----|------------------------------------------------------------|------|--|
| 5:45 | ST    | SB | Use a wrapper to piggyback her child on the back           |      |  |
| 5:50 | ST    | SB | Carrying her child on the back                             |      |  |
| 5:55 | ST    | SB | Carrying her child on the back                             |      |  |
| 6:00 | ST    | SB | Carrying her child on the back                             |      |  |
| 6:05 | ST    |    | Lays the child in the room and cover the body with wrapper |      |  |
| 6:10 | ST    |    | Fetches water in a bucket                                  |      |  |
| 6:15 | ST    |    | Goes into the bathroom with the bucket of water            |      |  |
| 6:20 | TG    |    | Pours dry okro into the mortar                             | okro |  |
| 6:25 | TG    |    | Pounding dried okro                                        | okro |  |
| 6:30 | TG    |    | Pounding dried okro                                        | okro |  |
| 6:35 | BS    |    | Collects the pastel and also pounds                        | okro |  |
| 6:40 | BS,TG |    | Pounding okro                                              | okro |  |
| 6:45 | BS,TG |    | Pounding okro                                              | okro |  |
| 6:50 | BS,TG |    | Goes into the kitchen to bring a spoon                     |      |  |
| 6:55 | BS    |    | Uses the spoon to fetch the dried okro into a small plate  |      |  |
| 7:00 | TG    |    | Into the kitchen to cooks                                  |      |  |



[illegible]

[illegible]

[illegible]



| Question                                                                                                                                                      | Write your <u>detailed</u> response here                                                                                                                                                                                                                                                                    |
|---------------------------------------------------------------------------------------------------------------------------------------------------------------|-------------------------------------------------------------------------------------------------------------------------------------------------------------------------------------------------------------------------------------------------------------------------------------------------------------|
| <p>1. In this household, what would be the best way(s) to give nutritional supplements such as an MNP to young children to ensure compliance?</p> <p>Why?</p> | <p>The best way to give MNP to the young child in this household is to give then in the morning. that is when the young child will give compliance.</p> <p>Because during other time like in the afternoons or evening the young child reject any other food except the mothers breast milk .</p>           |
| <p>2. In this household, who is favored during meal preparation or feeding?</p> <p>How is this favoritism expressed?</p>                                      | <p>The younger child is favored because all attention is on him when his semisolid food is ready (kunu) this because this younger child is presently ill.</p> <p>It is expressed in such a way that his kunu is make separately from other children's kunu. And his kunu is always with groundnut pest.</p> |
| <p>3. How could we promote the MNP supplement for this family that would attract their attention?</p> <p>Who would they listen to?</p>                        | <p>The MNP should be promoted through the mother because she understand the health condition of the child better than anyone else.</p> <p>The would listen to the mother since she is always around</p>                                                                                                     |

|                                                                                                                                                                |                                                                                                                                                                                                                                                                                                                                                                                                                                                           |
|----------------------------------------------------------------------------------------------------------------------------------------------------------------|-----------------------------------------------------------------------------------------------------------------------------------------------------------------------------------------------------------------------------------------------------------------------------------------------------------------------------------------------------------------------------------------------------------------------------------------------------------|
|                                                                                                                                                                |                                                                                                                                                                                                                                                                                                                                                                                                                                                           |
| <p>4. In this household, what would be the best ways to promote the MNP but limit how much it would be shared?</p> <p>Why?</p>                                 | <p>The best way to promote this product is still through the mother and the possibility that the product would be shared is limited because other children think the product is only meant for the younger child because he is ill.</p> <p>The product may likely not capture the attention of other children because of the child condition the mother herself may not share the product because she want her child to uses all of it and get better</p> |
| <p>5. What other issues and concerns did you see with this family that are important for us to consider with regard to introduction of an MNP?</p> <p>Why?</p> | <p>There are no other concerns as far as this household is concern only that the younger child present conditions is pathetic</p> <p>The mother maintains a proper hygiene but due to the health status of this young child the mother may not be able to notice any impact the MNP has on the child yet.</p>                                                                                                                                             |
| <p>6. Based on your experience observing this child today, do</p>                                                                                              | <p>There were two or three occasion when the mother would do</p>                                                                                                                                                                                                                                                                                                                                                                                          |

|                                                                                                                                                             |                                                                                                                                                                                                                                                                               |
|-------------------------------------------------------------------------------------------------------------------------------------------------------------|-------------------------------------------------------------------------------------------------------------------------------------------------------------------------------------------------------------------------------------------------------------------------------|
| <p>you believe reactivity negatively impacted your ability to see the food-related behaviors of the child?</p> <p>Please explain your answer in detail.</p> | <p>something and check to if am watching her .aside from that my observation was no affected</p> <p>The mother was trying to show that she is mindful of the young child hygiene by rinsing the spoon to feed the child with and washing her hand before preparing kunun.</p> |
|-------------------------------------------------------------------------------------------------------------------------------------------------------------|-------------------------------------------------------------------------------------------------------------------------------------------------------------------------------------------------------------------------------------------------------------------------------|
