# Supplementary material for: Acceptance and compliance with micronutrient powder (MNP) among children aged 6–23 months in northern Nigeria
Source: PLOS journal article supplement (doi:10.1371/journal.pgph.0000961), 2022-10-17
Supplement: S8 (10.1371/journal.pgph.0000961.s008) [file journal.pgph.0000961.s008]

## SPOT CHECK RECORDING FORM

State: ADAMAWA LGA: GANYE Community: GURUM NUVAN

Sex of index child: FEMALE Age of index child (in months): 22MONTHS

### Spot Check Information

1. Date of MNP distribution to household (circle option below based on LGA name above):

 **Kebbi:** BirninKebbi&Jega LGA: **June 16**

 **Kebbi:** Danko-wasagu: **June 17**

 **Adamawa:** Song, Ganye: **(June 18)**

 **Adamawa:** Guyuk **June 19**

2. Date of Spot Check Observation: 8<sup>th</sup> July, 2015

3. Number of sachets remaining (Ask the caregiver to show you and count the specific number of sachets remaining):

**39**

4. Number of sachets that should remaining one MNP sachet per day (Analyst only):

**41**

5. Number of sachets remaining / number of sachets should be remaining (Analyst only):

39/41 = 95.1 100%

## **Probes**

**Question 1.** You have **XX** MNP sachets remaining. Explain how easy or difficult it was to use the MNP product on a daily basis for your child 6 – 23 months? (Circle one answer)

**Very Difficult**

**Difficult**

**(Easy)**

**Very Easy**

**Question 2.** Describe any specific challenges that you faced that made the MNP difficult to use on a daily basis? No challenges

**Question 3.** Describe specific aspects of the MNP product that you or your child enjoyed that made it easier to use on a daily basis?

The way it make my child to be eaten food that is why it is easy to use on a daily basis.

**Question 4.** What questions do you have about the MNP based on your experience using it?  
**For how long would a child continue to take this mnp before he stop?**

**Question 5.** What specific recommendations do you have that we can do as a program to make the MNP easier to use on a daily basis?

If there is a way in which this kunu can be provided in powdery form and given to us care givers, it will constantly serve as a reminder to administer the MNP on a daily basis.
