# Supplementary material for: Acceptance and compliance with micronutrient powder (MNP) among children aged 6–23 months in northern Nigeria
Source: PLOS journal article supplement (doi:10.1371/journal.pgph.0000961), 2022-10-17
Supplement: S8 (10.1371/journal.pgph.0000961.s008) [file journal.pgph.0000961.s008]

## SPOT CHECK RECORDING FORM

State: ADAMAWA LGA: GANYE Community: SANSIRI

Sex of index child: F Age of index child (in months): 7

### Spot Check Information

1. Date of MNP distribution to household (circle option below based on LGA name above):

-  **Kebbi:** BirninKebbi&Jega LGA: **June 16**
-  **Kebbi:** Danko-wasagu: **June 17**
-  **Adamawa:** Song, Ganye: **(June 18)**
-  **Adamawa:** Guyuk **June 19**

2. Date of Spot Check Observation: 6-07-2015

3. Number of sachets remaining (Ask the caregiver to show you and count the specific number of sachets remaining):

43

4. Number of sachets that should remain using one MNP sachet per day (Analyst only):

43

5. Number of sachets remaining / number of sachets should be remaining (Analyst only):

43 / 43 = 100 %

### Probes

**Question 1.** You have **XX** MNP sachets remaining. Explain how easy or difficult it was to use the MNP product on a daily basis for your child 6 – 23 months? (Circle one answer)

**Very Difficult**

**Difficult**

**Easy**

**(Very Easy)**

**Question 2.** Describe any specific challenges that you faced that made the MNP difficult to use on a daily basis? THERE WAS NO CHALLENGE

**Question 3.** Describe specific aspects of the MNP product that you or your child enjoyed that made it easier to use on a daily basis? THE MNP MAKES THE CHILD TO SLEEP VERY WELL FOR A PROLONG HOURS ON A DAILY BASIS.....THE MNP HAS INCREASED CONSIDERABLY THE AMOUNT OF FOOD INTAKE BY THE CHILD ON A DAILY BASIS..... THE CHILD HAS ADDED A BIT OF WEIGHT.....THE BABY'S FATHER IS REALLY INTERESTED IN ENSURING THAT THE BABY TAKES THE MNP REGULARLY.

**Question 4.** What questions do you have about the MNP based on your experience using it? WHAT IS THE MEANING OF MIXME/.....DOES THE MNP HELP DEVELOP THE BRAIN?.....CAN THE MNP BE GIVEN WITH OTHER DRUGS IN CASE THE CHILD IS SICK AND ON MEDICATIONS?.....WHAT HAPPEN IF I FORGET TO GIVE MY CHILD THE MNP FOR LIKE 3 DAYS.

**Question 5.** What specific recommendations do you have that we can do as a program to make the MNP easier to use on a daily basis?
