# Supplementary material for: Acceptance and compliance with micronutrient powder (MNP) among children aged 6–23 months in northern Nigeria
Source: PLOS journal article supplement (doi:10.1371/journal.pgph.0000961), 2022-10-17
Supplement: S8 (10.1371/journal.pgph.0000961.s008) [file journal.pgph.0000961.s008]

### 1.1.1 Instrument F –Direct Observation Form

#### <<Instrument F Direct Observation Form>>

**PI Name:** PragmaMathema, Stephen Kodish

**Study Title:** Formative research to develop an infant and young child feeding (IYCF) intervention with micronutrient powder (MNP) for children aged 6 – 23 months

**PI Version/Date:** Version1.0/January 24, 2015

Date: 12/07/15 Location: Rafin gora

Data Collector: Amina Duniya

Main goals of this direct observation are to answer the following questions:

1. In this household, what would be the best way(s) to give nutritional supplements to young children? Why?
2. In this household, describe the food sharing that you observe throughout the meal. Are there any predictable patterns?
3. In this household, who is favored and how is this favoritism expressed during meal preparation and eating?

Household Composition Table (Fill out as you do data collection)

| INITIALS | SEX (M/F) | AGE (estimated) | Relationship to household | Description (not necessary)                                                                       |
|----------|-----------|-----------------|---------------------------|---------------------------------------------------------------------------------------------------|
| BM       | F         | 25years         | Mother of the baby        | Slim, dark in complexion with tribal marks, wearing a blue and cream blouse, tying a blue wrapper |
| BG       | F         | 17months        | Baby girl of the house    | Dark in complexion, wearing a blue top and green short with blue earrings                         |
| SB       | M         | 4years          | Senior brother to BG      | Dark in complexion and wearing a blue kaftan                                                      |
| BL       | M         | 20years         | Brother in-law            | Very dark in complexion, wearing a red top and black trouser                                      |
| NW       | F         | 27years         | neighbor                  | Dark in complexion, pregnant and tying a blue wrapper on her chest                                |
| FH       | M         | 40years         | Father of the household   | Tall not so dark in complexion, wearing a purple kaftan top and cream trouser                     |
|          |           |                 |                           |                                                                                                   |
|          |           |                 |                           |                                                                                                   |

PARTICIPANT ID: \_\_\_\_\_

| TIME  | ACTOR INITIALS | RECIPIENT INITIALS | WHAT HAPPENED                                        | FOOD               | Reactivity |
|-------|----------------|--------------------|------------------------------------------------------|--------------------|------------|
| 10:00 | BM             | BG                 | Strapped BG to her back, BG is sick                  |                    |            |
| 10:05 | BM             | BG                 | Still strapped to mother's back                      |                    |            |
| 10:10 | BG             |                    | Sleeping                                             |                    |            |
|       | BM             |                    | Washing clothes                                      |                    |            |
| 10:20 | BM             |                    | Still washing while BG is still strapped to her back |                    |            |
| 10:30 | BG             |                    | Wakes up and begins to cry                           |                    |            |
|       | BM             | BG                 | Brings her down and keeps her on the mat             |                    |            |
| 10:35 | BG             |                    | Lies down on the mat                                 |                    |            |
| 10:40 | BM             | BG                 | Gives her tuwo and okra soup                         | tuwo and okra soup |            |
| 10:45 | BG             |                    | Still eating                                         | tuwo and okra soup |            |
|       | BM             | BG                 | Still eating                                         | tuwo and okra soup |            |
| 10:50 | SB             |                    | Starts to cry for food too                           |                    |            |
|       | BM             | SB                 | Tells him to wait for BG to finish eating            |                    |            |
|       | BG             |                    | BG finishes eating                                   | tuwo and okra soup |            |
| 10:55 | BM             | SB                 | Gives the remaining food to SB to eat                |                    |            |
|       | BG             |                    | sleeping                                             |                    |            |
| 11:00 | SB             |                    | Still eating                                         |                    |            |
|       | BG             |                    | Sleeping                                             |                    |            |

| TIME  | ACTOR INITIALS | RECIPIENT INITIALS | WHAT HAPPENED                                                | FOOD | Reactivity |
|-------|----------------|--------------------|--------------------------------------------------------------|------|------------|
|       |                |                    |                                                              |      |            |
|       | SB             |                    | Finish eating and BM carries the plate to her room           |      |            |
| 11:05 | BG             |                    | Still sleeping                                               |      |            |
|       | BM             |                    | Watching BG as she sleeps                                    |      |            |
| 11:10 | BB             |                    | Still sleeping                                               |      |            |
|       | BB             |                    | Wakes up and starts crying                                   |      |            |
|       | BM             |                    | Gives BG water to drink                                      |      |            |
| 11:15 | BB             |                    | Goes back to sleep                                           |      |            |
| 11:20 | BG             | BM                 | Wakes up, starts crying and goes to lie down on mother's lap |      |            |
|       | BG             |                    | Continues sleeping on BM's lap                               |      |            |
| 11:25 | BG             |                    | Still sleeping                                               |      |            |
| 11:30 | BG             |                    | Still sleeping                                               |      |            |
| 11:40 | BG             |                    | Still sleeping                                               |      |            |
|       | BM             |                    | Watching BG while she sleeps                                 |      |            |
| 11:50 | BG             |                    | Still sleeping                                               |      |            |
|       | BM             |                    | Lies down next to baby girl but not sleeping                 |      |            |
| 12:00 | BG             |                    | Still sleeping                                               |      |            |
| 12:15 | MF             |                    | Comes into the house and BM gets up                          |      |            |
|       | BM             | MF                 | Gisting while BG sleeps                                      |      |            |
|       | BG             |                    | Still sleeping                                               |      |            |
|       | BM             |                    | Still gisting                                                |      |            |

| TIME  | ACTOR INITIALS | RECIPIENT INITIALS | WHAT HAPPENED                                                      | FOOD | Reactivity |
|-------|----------------|--------------------|--------------------------------------------------------------------|------|------------|
| 12:25 | BG             |                    | Still sleeping                                                     |      |            |
| 12:30 | BG             |                    | Still sleeping                                                     |      |            |
|       | BM             | MF                 | Still gisting                                                      |      |            |
| 12:40 | BG             |                    | Still sleeping                                                     |      |            |
|       | BM             | MF                 | Still gisting                                                      |      |            |
|       | BG             |                    | Wakes up and begins to cry                                         |      |            |
|       | BM             | BG                 | Carries her on her back and rocks her to sleep                     |      |            |
| 12:45 | BG             |                    | Goes back to sleep on BM's lap                                     |      |            |
|       | BM             | MF                 | Still gisting with MF                                              |      |            |
| 12:50 | BG             |                    | Still sleeping                                                     |      |            |
| 12:55 | BG             |                    | Still sleeping                                                     |      |            |
|       | BM             | BG                 | Puts BG back on the mat to sleep                                   |      |            |
|       | BM             | MF                 | Continues gisting with MF                                          |      |            |
| 1:00  | BG             |                    | Still sleeping                                                     |      |            |
| 1:05  | BG             |                    | Still sleeping                                                     |      |            |
|       | MF             |                    | Gets up to leave                                                   |      |            |
|       | BM             | MF                 | Sees her close to door, comes back and sits close to BG            |      |            |
| 1:10  | BG             |                    | Still sleeping                                                     |      |            |
|       |                |                    |                                                                    |      |            |
| 1:20  | BG             |                    | Still sleeping                                                     |      |            |
|       | BM             | BG                 | Using a piece of plastic fan to blow baby because she was sweating |      |            |

| TIME | ACTOR INITIALS | RECIPIENT INITIALS | WHAT HAPPENED                                                                                       | FOOD               | Reactivity |
|------|----------------|--------------------|-----------------------------------------------------------------------------------------------------|--------------------|------------|
|      | SB             |                    | Comes back and lies down on the mat to sleep                                                        |                    |            |
| 1:25 | SB             | BM                 | Askes BM for water and BM agrees                                                                    |                    |            |
|      | BG             |                    | Also wakes up from sleep                                                                            |                    |            |
|      | BM             | BG                 | Gives her water to drink                                                                            |                    |            |
| 1:30 | BM             | BG                 | Gives he cold tuwo and okra to eat without washing the soup bowl                                    | Tuwo and okra soup |            |
|      | BG             | BM                 | Tells mother she needs to use the toilet                                                            |                    |            |
|      | BM             | BG                 | Takes he rto front to the house to defecate on the floor                                            |                    |            |
|      | BM             |                    | Leaves the food on the floor with flies perching on it                                              |                    |            |
| 1:35 | BM             | BG                 | BG finishes defecating and BM her up with water, brings her into the room and places her on the mat |                    |            |
|      | BM             |                    | Goes back to pack the feaces and throws it into the pit toilet                                      |                    |            |
|      | BG             |                    | Defecates again on the mat                                                                          |                    |            |
|      | BM             | BG                 | Picks her from the mat to the floor to continue                                                     |                    |            |
|      | BM             |                    | Carries the mat and keeps outside                                                                   |                    |            |
|      | BG             |                    | Defecates a little on the floor in the room                                                         |                    |            |
|      | BM             | BG                 | Takes her outside to continue                                                                       |                    |            |
| 1:40 | BM             |                    | Pours sand on the faeces in the room, and used a broom to pack it                                   |                    |            |
|      | BM             |                    | Goes to wash BG's buttocks after she was done                                                       |                    |            |
|      | BM             | BG                 | Brings her inside and drops her on another mat                                                      |                    |            |
|      | BM             |                    | Goes back outside to pack the faeces BG dropped outside                                             |                    |            |
|      | BM             | BG                 |                                                                                                     | tuwo and           |            |

| TIME | ACTOR INITIALS | RECIPIENT INITIALS | WHAT HAPPENED                                                                           | FOOD      | Reactivity |
|------|----------------|--------------------|-----------------------------------------------------------------------------------------|-----------|------------|
| 1:45 |                |                    | Comes back abd begins to feed BG with tuwo and okra soup without hand washing           | okra soup |            |
|      | BG             | BM                 | Finish feeding BG and gives her some water to drink                                     |           |            |
|      | BM             |                    | Pours some of the water in a dirty cup and washes her hand with it                      |           |            |
| 1:50 | BG             |                    | Asks for more food                                                                      |           |            |
|      | BM             | BG                 | Carries the food again and gives BG to eat by herself                                   |           |            |
|      | BB             |                    | Begins to eat the food on BM's lap with dirty hands                                     |           |            |
|      | BG             |                    | Asks for water to drink                                                                 |           |            |
|      | BM             | BG                 | Gives her water to drink                                                                |           |            |
|      | BG             |                    | Continues eating and ask for water                                                      |           |            |
|      | BM             | BG                 | Gives her some more water to drink                                                      |           |            |
| 1:55 | BG             |                    | Finished eating and ask for water                                                       |           |            |
|      | BM             | BG                 | Gives her more water to drink                                                           |           |            |
|      | BM             | BG                 | Pours the remaining water into the empty soup bowl and washes BG's hands with it        |           |            |
|      | BM             | BG                 | Drops baby on the mat and washes the soup bowl with the water used in washing BG's hand |           |            |
| 2:00 | BM             |                    | Throws the water outside the door                                                       |           |            |
|      | BM             |                    | Also lies down on the mat close to BG and SB                                            |           |            |
| 2:05 | BG             |                    | Lying down on the mat not sleeping but SB is sleeping                                   |           |            |
|      | BM             |                    | Using her head tie to drive away flies from BG and SB                                   |           |            |
|      | BG             |                    | Still lying down but not sleeping                                                       |           |            |

| TIME | ACTOR INITIALS | RECIPIENT INITIALS | WHAT HAPPENED                                                                             | FOOD | Reactivity |
|------|----------------|--------------------|-------------------------------------------------------------------------------------------|------|------------|
| 2:10 |                |                    |                                                                                           |      |            |
|      | BG             |                    | Starts sleeping                                                                           |      |            |
| 2:20 | BG             |                    | Still sleeping with SB                                                                    |      |            |
|      | BG             |                    | Wakes up and asks for water                                                               |      |            |
|      | BM             | BG                 | Gives her water to drink                                                                  |      |            |
| 2:30 | BG             |                    | Goes back to sleep                                                                        |      |            |
| 2:40 | BB             |                    | Still sleeping                                                                            |      |            |
|      | BM             |                    | sleeping                                                                                  |      |            |
| 2:45 | BG             |                    | Wakes up and asks for water                                                               |      |            |
|      | BM             | BG                 | Gives her water to drink                                                                  |      |            |
| 2:50 | SB             |                    | Wakes up and starts to cry                                                                |      |            |
|      | BM             |                    | Goes out of the room                                                                      |      |            |
|      | SB             |                    | Stops crying but still lying down (looking hungry)                                        |      |            |
|      | BG             |                    | Starts crying                                                                             |      |            |
|      | BM             |                    | Continues what she is doing outside                                                       |      |            |
| 2:55 | BM             |                    | Comes in with a left over tuwo, which she mixed with water and added sugar                |      |            |
|      | B M            | BG                 | Feeds BG with it while SB starts to cry, tells him to get a spoon                         |      |            |
|      | SB             |                    | Goes and comes back with a spoon and also begins to feed from the gruel while BM feeds BG |      |            |
| 3:00 | BM             | BG                 | Still feeding BG while SB still drinks from the gruel                                     |      |            |
| 3:05 | BG             |                    | Stops drinking                                                                            |      |            |
|      | SB             |                    | Continues to drink                                                                        |      |            |

| TIME | ACTOR INITIALS | RECIPIENT INITIALS | WHAT HAPPENED                                                            | FOOD                 | Reactivity |
|------|----------------|--------------------|--------------------------------------------------------------------------|----------------------|------------|
| 3:10 | SB             |                    | Finish drinking and lies down on the mat                                 |                      |            |
|      | BG             |                    | Comes down from BM's lap and goes outside to defecate again on the floor |                      |            |
| 3:15 | BM             | BG                 | BG finishes and BM washes her up and brings her to the room              |                      |            |
|      | BM             |                    | Packs the feaces from the floor and throws into the toilet               |                      |            |
| 3:20 | BM             | BG                 | Carries BG and straps her to her back with a wrapper                     |                      |            |
|      | BM             |                    | Drinks the remaining gruel left                                          | Gruel made from tuwo |            |
| 3:25 | BM             |                    | Finished drinking the gruel                                              |                      |            |
|      | BG             |                    | Begins to fuss on mother's back                                          |                      |            |
|      | BM             | BG                 | Comforts her while she keeps quiet                                       |                      |            |
| 3:30 | BM             | BG                 | Brings her down and carries her on her laps                              |                      |            |
| 3:35 | BM             | BG                 | Still carrying her on her laps                                           |                      |            |
| 3:40 | BG             |                    | Comes down from BM's laps and begins to play                             |                      |            |
|      | BG             |                    | Starts crying and climbs back to mother's lap                            |                      |            |
| 3:45 | BG             |                    | Still on mother's lap                                                    |                      |            |
|      | BL             |                    | Comes back from the farm and sits with BM                                |                      |            |
|      | NW             |                    | Comes into the house and sits with BM and BL                             |                      |            |
| 3:50 | BM             |                    | Gisting with BL and NW                                                   |                      |            |
|      | BG             |                    | Still lying down on mother's lap                                         |                      |            |
| 3:55 | SB             |                    | Wakes up and starts crying                                               |                      |            |



| TIME | ACTOR INITIALS | RECIPIENT INITIALS | WHAT HAPPENED                                                                                               | FOOD                   | Reactivity |
|------|----------------|--------------------|-------------------------------------------------------------------------------------------------------------|------------------------|------------|
|      | BM             | SB                 | BM tells him to stop crying and he does                                                                     |                        |            |
|      | BM             |                    | Still lying on BM's laps                                                                                    |                        |            |
| 4:00 | BM             | BG                 | Goes into the room and brings 'HEKIDORO' vegetable, mixed with palm kernel oil and salt and gives BG to eat | Hekidoro vegetable     |            |
|      | SB             |                    | Still crying and BM does not ans him                                                                        | Hekidoro vegetable     |            |
| 4:10 | BG             |                    | Still eating 'hekidoro'                                                                                     |                        |            |
|      | SB             |                    | Still crying and running a temperature                                                                      |                        |            |
|      | BM             |                    | Gives BG tuwo dawa to eat with hekidoro                                                                     | Tuwo dawa and hekidoro |            |
| 4:15 | BM             | SB                 | Tells him to eat some food but he refuses                                                                   |                        |            |
|      | BM             | SB                 | Gives him paracetamol to drink                                                                              |                        |            |
| 4:20 | BG             |                    | Still eating                                                                                                | Tuwo dawa and hekidoro |            |
|      | SB             |                    | Still crying                                                                                                |                        |            |
| 4:25 | BG             |                    | Still eating                                                                                                | Tuwo dawa and hekidoro |            |
|      | BM             | BG&SB              | Gives them some biscuit to eat                                                                              | biscuit                |            |
| 4:30 | SB             |                    | Finish eating biscuit and lies down on the mat                                                              |                        |            |
|      | BG             |                    | Still eating biscuit                                                                                        | Biscuit                |            |
| 4:35 | BG             |                    | Finish eating biscuit and begins to play                                                                    |                        |            |
| 4:40 | BM             |                    | Comes into the house with 'kuka powder' and begins to sieve it                                              |                        |            |
|      | BG             | BM                 | Starts crying for BM to carry her                                                                           |                        |            |

| TIME | ACTOR INITIALS | RECIPIENT INITIALS | WHAT HAPPENED                                                                                                  | FOOD | Reactivity |
|------|----------------|--------------------|----------------------------------------------------------------------------------------------------------------|------|------------|
|      | BM             | BG                 | Straps BG to her back                                                                                          |      |            |
| 4:45 | BM             |                    | Still sieving 'kuka' leaves with BG strapped to her back                                                       |      |            |
| 4:50 | FH             |                    | Comes back from the farm                                                                                       |      |            |
|      | BM             |                    | Goes to fetch water from the well with BG still strapped to her back                                           |      |            |
|      | BM             |                    | Keeps water in the bathroom for FH to take his bath and continues sieving                                      |      |            |
|      | BM             | BG                 | Still strapped to her back                                                                                     |      |            |
| 4:55 | BM             |                    | Still sieving                                                                                                  |      |            |
|      |                |                    | Finish sieving and goes out to pound the pellets of kuka leaves still remaining. BG still strapped to her back |      |            |
| 5:00 | BM             |                    | Finish pounding and continues to sieve kuka with BG strapped to her back                                       |      |            |
| 5:05 | BM             |                    | Goes out to fetch water and firewood with BG strapped to her back                                              |      |            |
|      | BM             |                    | Comes back and goes out to the bore hole in the community to fetch water while baby is strapped to her back    |      |            |
| 5:10 | BM             |                    | Waiting for her turn at the borehole, BG still strapped to her back                                            |      |            |
| 5:15 | BM             |                    | Still Waiting for her turn at the borehole, finally gets to fetch water                                        |      |            |
| 5:20 | BM             |                    | Walks back home with bucket of water on her head while baby is still strapped to her back                      |      |            |
|      | BM             | BG                 | Drops her on the mat and goes to wash some clothes                                                             |      |            |
| 5:25 | BM             |                    | Still washing                                                                                                  |      |            |

| TIME | ACTOR INITIALS | RECIPIENT INITIALS | WHAT HAPPENED                                                                                               | FOOD | Reactivity |
|------|----------------|--------------------|-------------------------------------------------------------------------------------------------------------|------|------------|
|      | BG             |                    | Lying down on the mat and sleeping                                                                          |      |            |
| 5:30 | BM             |                    | Still washing clothes                                                                                       |      |            |
|      | BG             |                    | Still sleeping                                                                                              |      |            |
| 5:35 | BM             |                    | Still washing clothes                                                                                       |      |            |
|      | BG             |                    | Still sleeping                                                                                              |      |            |
| 5:45 | BM             |                    | Finish washing the cloth and puts them on a line to dry                                                     |      |            |
|      | FH             |                    | Comes in with some drugs for BG and gives them to BM.<br>FH bought the drugs from the chemist, he was asked |      |            |
| 5:50 | BM             | BG                 | Wakes baby fro sleep and gives her the drugs to take                                                        |      |            |
|      | BM             | BG                 | Gives her a capsule of quinne syrup and a capful of paracetamol                                             |      |            |
| 5:55 | BM             | FH                 | Gives BG to her father to hold while she goes to keep the drugs inside the bedroom                          |      |            |
|      | BM             |                    | Comes back with some water to give BG to drink                                                              |      |            |
| 6:00 | BM             |                    | Collects ger from FH and straps her to her back and goes back to prepare the meal                           |      |            |
| 6:05 | BM             |                    | Puts water on the fire with pepper, locust bean, potash and salt to boil                                    |      |            |
| 6:15 | BM             |                    | Adds 'kuka' leaves and mixes it together                                                                    |      |            |
| 6:20 | BM             |                    | Allows it to boil for 5minutes and brings it down                                                           |      |            |
| 6:25 | BM             |                    | Puts another pot of water to boil to makes tuwo dawa                                                        |      |            |
| 6:30 | BM             |                    | Adds flour paste to boiling water and mix thoroughly                                                        |      |            |
| 6:35 | BM             |                    | Allows to cook for 5 minutes and brings it down                                                             |      |            |
| 6:40 | BM             |                    | Dishes food into 4 different plates                                                                         | Tuwo |            |

| TIME | ACTOR INITIALS | RECIPIENT INITIALS | WHAT HAPPENED                                                                                                        | FOOD           | Reactivity |
|------|----------------|--------------------|----------------------------------------------------------------------------------------------------------------------|----------------|------------|
|      |                |                    |                                                                                                                      | and miyan kuka |            |
|      | BM             |                    | Carries the plate to the sitting room and calls FH,SB and BG to eat                                                  |                |            |
| 6:50 | BM             | FH                 | Served him his food seperately                                                                                       |                |            |
|      | BM             | SB                 | Tells him to pick his food from the tray                                                                             |                |            |
|      | BM             | BG                 | Carries her food and that of BG and sits at one corner of the house where they both eat with BM monitoring BG to eat |                |            |

## NOTE

BG has been sick for a week and husband orders she should not be given MNP until she gets better.

Primary Questions (Complete after you complete data collection):

From what you have seen observing THIS HOUSEHOLD, please answer the following questions in detail:

| Question                                                                                                                                               | Write your <u>detailed</u> response here                                                          |
|--------------------------------------------------------------------------------------------------------------------------------------------------------|---------------------------------------------------------------------------------------------------|
| 1. In this household, what would be the best way(s) to give nutritional supplements such as an MNP to young children to ensure compliance?<br><br>Why? | The best way is through the mother because eshe is always with the child and monitor's her eating |
| 2. In this household, who is favored during meal preparation or feeding?                                                                               | The baby is favored more because during the meal time, the mother paid several Attention to her   |

|                                                                                                                                        |                                                                                                                              |
|----------------------------------------------------------------------------------------------------------------------------------------|------------------------------------------------------------------------------------------------------------------------------|
| How is this favoritism expressed?                                                                                                      |                                                                                                                              |
| <p>3. How could we promote the MNP supplement for this family that would attract their attention?</p> <p>Who would they listen to?</p> | By educating them on the benefit of the MNP to the child                                                                     |
| <p>4. In this household, what would be the best ways to promote the MNP but limit how much it would be shared?</p> <p>Why?</p>         | By advising mothers on the need to give only the child the nutrient is meant for, if not the child will not get any nutrient |
| 5. What other issues and                                                                                                               | There is a problem of hygiene, there was no proper hand washing                                                              |

|                                                                                                                                                                                                                        |                                  |
|------------------------------------------------------------------------------------------------------------------------------------------------------------------------------------------------------------------------|----------------------------------|
| <p>concerns did you see with this family that are important for us to consider with regard to introduction of an MNP?</p> <p>Why?</p>                                                                                  | <p>practices prior to eating</p> |
| <p>6. Based on your experience observing this child today, do you believe reactivity negatively impacted your ability to see the food-related behaviors of the child?</p> <p>Please explain your answer in detail.</p> | <p>No I don't think so</p>       |
