# Supplementary material for: Acceptance and compliance with micronutrient powder (MNP) among children aged 6–23 months in northern Nigeria
Source: PLOS journal article supplement (doi:10.1371/journal.pgph.0000961), 2022-10-17
Supplement: S8 (10.1371/journal.pgph.0000961.s008) [file journal.pgph.0000961.s008]

### 1.1.1 Instrument F –Direct Observation Form

#### <<Instrument F Direct Observation Form>>

**PI Name:** PragmaMathema,Stephen Kodish

**Study Title:** Formative research to develop an infant and young child feeding (IYCF) intervention with micronutrient powder (MNP) for children aged 6 – 23 months

**PI Version/Date:** Version1.0/January 24, 2015

Date: 22<sup>TH</sup> JUNE, 2015 Location: SANDOKA L.G.A

Data Collector: ANTIYA SANDA Participant ID: A HOUSE BY THE HIGHWAY

Main goals of this direct observation are to answer the following questions:

1. In this household, what would be the best way(s) to give nutritional supplements to young children? Why?
2. In this household, describe the food sharing that you observe throughout the meal. Are there any predictable patterns?
3. In this household, who is favored and how is this favoritism expressed during meal preparation and eating?

(TEAR OFF AT PERFORATED DOTTED LINE BELOW)

-----

PARTICIPANT ID: \_\_\_\_\_

Household Composition Table (Fill out as you do data collection)

| INITIALS | SEX (M/F) | AGE (estimated) | Relationship to household | Description                           |
|----------|-----------|-----------------|---------------------------|---------------------------------------|
| ST       | F         | 29 YEARS        | WIFE                      | A SLIM TALL WOMAN                     |
| LB       | M         | 9 MONTHS        | CHILD                     | A LITTLE BABY                         |
| BY       | F         | 7 YEARS         | FEMALE CHILD              | A BLACK YOUNG GIRL                    |
| TB       | F         | 15 YEARS        | OLDEST CHILD              | A TALL BLACK GIRL WITH A BLUE WRAPPER |
| SM       | F         | 2 YEARS         | FEMALE CHILD              | A SMALL BABY WITH YELLOW PANTS        |
| BS       | F         | 10 YEARS        | FEMALE CHILD              | A SLIM GIRL WITH A BROWN WRAPPER      |
|          |           |                 |                           |                                       |

|  |  |  |  |  |
|--|--|--|--|--|
|  |  |  |  |  |
|  |  |  |  |  |
|  |  |  |  |  |
|  |  |  |  |  |
|  |  |  |  |  |
|  |  |  |  |  |
|  |  |  |  |  |
|  |  |  |  |  |
|  |  |  |  |  |

PARTICIPANT ID: \_\_\_\_\_

| TIME | ACTOR INITIALS | RECIPIENT INITIALS | WHAT HAPPENED                                                     | FOOD        | Reactivity |
|------|----------------|--------------------|-------------------------------------------------------------------|-------------|------------|
| 9:00 | ST             |                    | SWEEPING                                                          |             |            |
| 9:05 | ST             | LB                 | BATHING HER CHILD                                                 |             |            |
| 9:10 | ST             | LB                 | BATHING HER CHILD                                                 |             |            |
| 9:15 | ST             | LB                 | CLEANING HIS BODY WITH TOWEL                                      |             |            |
| 9:20 | ST             | LB                 | APPLYING BODY CREAM                                               |             |            |
| 9:25 | ST             | LB                 | BREAST FEEDING                                                    | BREAST MILK |            |
| 9:30 | ST             | LB                 | BREAST FEEDING                                                    | BREAST MILK |            |
| 9:35 | ST             | LB                 | WEARING HER CHILD CLOTHES                                         |             |            |
| 9:40 | ST             | LB                 | WEARING HER CHILD CLOTHES AND BREAST FEEDING HIM AT THE SAME TIME | BREAST MILK |            |
| 9:45 | ST             | LB                 | APPLYING POWDER ON HER CHILDS BODY                                |             |            |

| TIME  | ACTOR INITIALS | RECIPIENT INITIALS | WHAT HAPPENED                     | FOOD                | Reactivity |
|-------|----------------|--------------------|-----------------------------------|---------------------|------------|
| 9:50  | ST             | LB                 | WEARING CLOTHE FOR THE CHILD      |                     |            |
| 9:55  | ST             |                    | KEEPS HER CHILD ON THE MAT        |                     |            |
| 10:00 | ST             |                    | BRINGS TOYS FOR THE CHILD         |                     |            |
| 10:05 | LB             |                    | PLAYING ON THE MAT                |                     |            |
| 10:10 | ST             | LB                 | BREAST FEEDING                    | BREAST MILK         |            |
| 10:15 | ST             | LB                 | BREAST FEEDING                    | BREAST MILK         |            |
| 10:16 | ST             |                    | BRINGS A FLASK AND A CUP          |                     |            |
| 10:17 | ST             |                    | POURS KUNU INTO A CUP             | GUINEA CORN         |            |
| 10:18 | ST             |                    | UNSEAL MNP POWDER                 |                     |            |
| 10:19 | ST             |                    | POURS MNP INTO KUNU               | MNP AND GUINEA CORN |            |
| 10:20 | ST             |                    | MIXED KUNU WITH MNP USING A SPOON | GUINEA CORN         |            |
| 10:21 | ST             | LB                 | CARRYS HER CHILD ON THE LAP       |                     |            |
| 10:22 | ST             | LB                 | STARTS FEEDING HIM WITH KUNU      | GUINEA CORN         |            |
| 10:23 | ST             | LB                 | FEEDING HER CHILD WITH KUNU       | GUINEA CORN         |            |
| 10:24 | ST             | LB                 | FEEDING HER CHILD WITH KUNU       | GUINEA CORN         |            |
| 10:25 | ST             | LB                 | FEEDING HER CHILD WITH KUNU       | GUINEA CORN         |            |
| 10:26 | ST             | LB                 | FEEDING HER CHILD WITH KUNU       | GUINEA CORN         |            |
| 10:27 | ST             | LB                 | FEEDING HER CHILD WITH KUNU       | GUINEA CORN         |            |
| 10:28 | ST             | LB                 | FEEDING HER CHILD WITH KUNU       | GUINEA CORN         |            |
| 10:29 | ST             | LB                 | FEEDING HER CHILD WITH KUNU       | GUINEA CORN         |            |

| TIME  | ACTOR INITIALS | RECIPIENT INITIALS | WHAT HAPPENED                                 | FOOD        | Reactivity |
|-------|----------------|--------------------|-----------------------------------------------|-------------|------------|
| 10:30 | ST             | LB                 | FEEDING HER CHILD WITH KUNU                   | GUINEA CORN |            |
| 10:35 | ST             |                    | KEEPS HER CHILD ON THE MAT                    |             |            |
| 10:40 | ST             |                    | TAKES EMPTY CUP TO WASH                       |             |            |
| 10:45 | ST             |                    | WASHES THE CUP AND KEEPS IT                   |             |            |
| 10:50 | ST             |                    | IS SITTING ON THE MAT                         |             |            |
| 10:55 | LB             |                    | PLAYING ON THE MAT                            |             |            |
| 11:00 | LB             |                    | PLAYING WITH TOYS ON THE MAT                  |             |            |
| 11:05 | LB             |                    | PLAYING ON THE MAT                            |             |            |
| 11:10 | TB             |                    | FETCHES WATER IN A POT                        | WATER       |            |
| 11:11 | TB             |                    | IS MAKING FIRE                                |             |            |
| 11:12 | TB             |                    | STILL MAKING FIRE                             |             |            |
| 11:13 | TB             |                    | BRINGS MORE FIRE WOOD                         |             |            |
| 11:14 | TB             |                    | PUTS POT FILLED WITH WATER INSIDE ON THE FIRE | WATER       |            |
| 11:15 | TB             |                    | COVERS THE POT WITH WATER INSIDE              | WATER       |            |
| 11:16 | TB             |                    | IS BLOWING THE FIRE                           |             |            |
| 11:26 | LB             |                    | STARTS SLEEPING                               |             |            |
| 11:31 | LB             |                    | SLEEPING                                      |             |            |
| 11:36 | LB             |                    | SLEEPING                                      |             |            |
| 11:41 | LB             |                    | SLEEPING                                      |             |            |
| 11:46 | LB             |                    | SLEEPING                                      |             |            |
| 11:51 | LB             |                    | SLEEPING                                      |             |            |

| TIME  | ACTOR INITIALS | RECIPIENT INITIALS | WHAT HAPPENED                                      | FOOD  | Reactivity |
|-------|----------------|--------------------|----------------------------------------------------|-------|------------|
| 11:52 | TB             |                    | CHECKING THE FIRE                                  |       |            |
| 11:53 | TB             |                    | BRINGS A BIG BOWL OF MAIZE FLOUR                   | MAIZE |            |
| 11:54 | TB             |                    | BRINGS A SIEVE AND A BOWL OF MAIZE FLOUR           | MAIZE |            |
| 11:55 | TB             |                    | STARTS SIEVING MAIZE FLOUR                         | MAIZE |            |
| 11:56 | TB             |                    | SIEVING MAIZE FLOUR                                | MAIZE |            |
| 11:57 | TB             |                    | SIEVING MAIZE FLOUR                                | MAIZE |            |
| 11:58 | TB             |                    | FETCHES MAIZE FLOUR IN A PAN                       | MAIZE |            |
| 11:59 | TB             |                    | BRINGS A LONG STICK                                |       |            |
| 12:00 | TB             |                    | OPENS THE POT                                      |       |            |
| 12:01 | TB             |                    | BRINGS MORE FIREWOOD                               |       |            |
| 12:02 | TB             |                    | PUTS MORE FIREWOOD INTO THE FIRE                   |       |            |
| 12:03 | TB             |                    | BRINGS LONG MIXING STICK                           |       |            |
| 12:04 | TB             |                    | RINSES THE LONG MIXING STICK                       |       |            |
| 12:05 | TB             |                    | BLOWS THE FIRE                                     |       |            |
| 12:06 | TB             |                    | IS POURING MAIZE FLOUR INTO BOILING WATER          | MAIZE |            |
| 12:07 | TB             |                    | POURING MAIZE FLOUR INTO BOILING WATER ON THE FIRE | MAIZE |            |
| 12:08 | TB             |                    | MIXING MAIZE FLOUR WITH A STICK                    | MAIZE |            |
| 12:09 | ST             |                    | COMES TO SUPERVISE THE COOKING PROCESS             |       |            |
| 12:10 | TB             |                    | MIXING THE MAIZE IN THE POT WITH STICK             | MAIZE |            |
| 12:11 | TB             |                    | POURS LITTLE WATER INTO IT                         | WATER |            |
| 12:12 | TB             |                    | COVERS THE POT                                     |       |            |

| TIME  | ACTOR INITIALS | RECIPIENT INITIALS | WHAT HAPPENED                           | FOOD  | Reactivity |
|-------|----------------|--------------------|-----------------------------------------|-------|------------|
|       |                |                    |                                         |       |            |
| 12:13 | TB             |                    | PUTS MORE FIREWOOD                      |       |            |
| 12:14 | TB             |                    | LEAVES THE KITCHEN                      |       |            |
| 12:15 | TB             |                    | GOES TO SIT BUT WATCHING THE FIRE       |       |            |
| 12:20 | LB             |                    | STILL SLEEPING                          |       |            |
| 12:25 | LB             |                    | SLEEPING                                |       |            |
| 12:30 | ST             |                    | SWEEPING THE COMPUND                    |       |            |
| 12:35 | ST             |                    | SWEEPING THE COMPOUND                   |       |            |
| 12:40 | ST             |                    | WASHING THE WATER POTS                  |       |            |
| 12:45 | ST             |                    | WASHING ALL THE WATER POTS              |       |            |
| 12:50 | ST             |                    | RINSING ALL THE WATER POTS              |       |            |
| 12:55 | ST             |                    | RINSING ALL THE WATER POTS              |       |            |
| 1:00  | TB             |                    | CHECKS FIRE AND ADD MORE FIREWOOD       |       |            |
| 1:01  | TB             |                    | OPENS THE POT TO CHECK IF ITS BOILING   |       |            |
| 1:06  | LB             |                    | WAKES FROM SLEEP                        |       |            |
| 1:07  | TB             |                    | OPENS THE POT ON THE FIRE               |       |            |
| 1:08  | TB             |                    | POURS MAIZE FLOUR INTO POT              | MAIZE |            |
| 1:09  | TB             |                    | POURS AND MIXES MAIZE WITH A STICK      | MAIZE |            |
| 1:10  | TB             |                    | IS MIXING THE MAIZE FASTER              | MAIZE |            |
| 1:11  | TB             |                    | IS MIXING THE MAIZE FASTER WITH A STICK | MAIZE |            |
| 1:12  | TB             |                    | CONTINUES TO MIX FASTER                 | MAIZE |            |
| 1:13  | TB             |                    | POURS MORE MAIZE INTO THE               | MAIZE |            |

| TIME | ACTOR INITIALS | RECIPIENT INITIALS | WHAT HAPPENED                              | FOOD                        | Reactivity |
|------|----------------|--------------------|--------------------------------------------|-----------------------------|------------|
|      |                |                    | POT                                        |                             |            |
| 1:14 | TB             |                    | CONTINUES TO MIX THE MAIZE                 | MAIZE                       |            |
| 1:15 | TB             |                    | IS MIXING MAIZE INTO TUWO                  | MAIZE                       |            |
| 1:16 | TB             |                    | REMOVES THE STICK                          |                             |            |
| 1:17 | TB             |                    | COVERS THE POT ON FIRE                     |                             |            |
| 1:18 | TB             |                    | TAKES THE BOWL OF MAIZE MEAL INTO THE ROOM | MAIZE                       |            |
| 1:19 | TB             |                    | WASHES THE SERVING PLATE                   |                             |            |
| 1:20 | TB             |                    | BRINGS THREE PLATE                         |                             |            |
| 1:21 | TB             |                    | RINSES ALL THE THREE PLATES                |                             |            |
| 1:22 | TB             |                    | OPENS THE POT ON THE FIRE                  |                             |            |
| 1:23 | TB             |                    | BRINGS THE MIXING STICK                    |                             |            |
| 1:24 | TB             |                    | CONTINUES TO MIX THE TUWO                  | MAIZE                       |            |
| 1:25 | TB             |                    | IS MIXING THE TUWO SLOWLY THIS TIME        | MAIZE                       |            |
| 1:26 | TB             |                    | REMOVES THE STICK                          |                             |            |
| 1:27 | TB             |                    | KEEPS THE STICK ASIDE                      |                             |            |
| 1:28 | TB             |                    | USES THE SERVING PLATE TO SERVE TUWO       | MAIZE                       |            |
| 1:30 | TB             |                    | REMOVES ALL THE FIREWOOD                   |                             |            |
| 1:31 | TB             |                    | POURS WATER ON THE FIREWOOD                |                             |            |
| 1:32 | TB             |                    | POURS WATER INTO EMPTY TUWO POT            |                             |            |
| 1:33 | TB             |                    | COVERS THE POT                             |                             |            |
| 1:34 | TB             |                    | BRINGS A POT OF SOUP FROM THEIR ROOM       | SPINACH LEAVES              |            |
| 1:35 | TB             |                    | OPENS THE POT OF SOUP                      | SPINACH AND GROUNDNUT PASTE |            |

| TIME | ACTOR INITIALS | RECIPIENT INITIALS | WHAT HAPPENED                      | FOOD                        | Reactivity |
|------|----------------|--------------------|------------------------------------|-----------------------------|------------|
| 1:36 | TB             |                    | STARTS SERVING THE SOUP            | SPINACH AND GROUNDNUT PASTE |            |
| 1:37 | TB             |                    | SERVES THE SOUP INTO 3 PLATES      | SPINACH AND GROUNDNUT PASTE |            |
| 1:38 | TB             |                    | STOPS SERVING THE SOUP             | SPINACH AND GROUNDNUT PASTE |            |
| 1:39 | BY             |                    | COMES TO PACK ALL THE PLATES       |                             |            |
| 1:40 | BY             |                    | COVERS EACH PLATE FIRST            |                             |            |
| 1:41 | BY             |                    | TAKES EACH PLATE TO A ROOM         |                             |            |
| 1:42 | BY             |                    | BRINGS A PLATE OF TUWO             | MAIZE                       |            |
| 1:43 | BY             |                    | KEEPS THE PLATE OF TUWO ON THE MAT | MAIZE                       |            |
| 1:44 | BY             |                    | KEEPS PLATE OF SOUP ON THE MAT     | SPINACH LEAVES              |            |
| 1:45 | BY, TB, SM, BS |                    | ALL EATING TOGETHER                | MAIZE WITH SPINACH LEAVES   |            |
| 1:50 | BY, TB, SM, BS |                    | ALL EATING FROM THE SAME PLATE     | MAIZE AND SPINACH LEAVES    |            |
| 1:55 | ST             | LB                 | BREASTFEEDING                      | BREAST MILK                 |            |
| 2:00 | ST             | LB                 | BREASTFEEDING                      | BREAST MILK                 |            |
| 2:05 | LB             |                    | PLAYING ON THE MAT                 |                             |            |
| 2:10 | ST             | LB                 | CARRY'S HER CHILD ON THE LAP       |                             |            |
| 2:15 | SB             | LB                 | CARRY'S HER CHILD ON THE LAP       |                             |            |
| 2:20 | SB             | LB                 | CARRY'S HER CHILD ON THE LAP       |                             |            |
| 2:25 | SB             | LB                 | BREASTFEEDING HER CHILD            | BREAST MILK                 |            |
| 2:30 | SB             | LB                 | BREASTFEEDING HER CHILD            | BREAST MILK                 |            |
| 2:35 | SB             | LB                 | BREASTFEEDING HER CHILD            | BREAST MILK                 |            |
| 2:40 | SB             | LB                 | BREASTFEEDING HER CHILD            | BREAST MILK                 |            |
| 2:45 | SB             |                    | KEEPS HER CHILD ON THE MAT         |                             |            |
| 2:50 | LB             |                    | STARTS PLAYING                     |                             |            |
| 2:55 | LB             |                    | PLAYING                            |                             |            |
| 3:00 | LB             |                    | PLAYING ON THE MAT                 |                             |            |
| 3:05 | SB             | LB                 | CARRY'S HER CHILD ON THE LAP       |                             |            |



| TIME | ACTOR INITIALS | RECIPIENT INITIALS | WHAT HAPPENED                     | FOOD        | Reactivity |
|------|----------------|--------------------|-----------------------------------|-------------|------------|
| 3:10 | SB             | LB                 | PLAYING WITH HER CHILD            |             |            |
| 3:15 | SB             | LB                 | PLAYING WITH HER CHILD            |             |            |
| 3:20 | SB             | LB                 | STARTS BREASTFEEDING              | BREAST MILK |            |
| 3:25 | SB             | LB                 | BREASTFEEDING                     | BREAST MILK |            |
| 3:30 | SB             | LB                 | BREASTFEEDING                     | BREAST MILK |            |
| 3:35 | SB             | LB                 | LYING TOGETHER ON THE MAT         |             |            |
| 3:40 | SB             |                    | TRYING TO PUT HER CHILD TO SLEEP  |             |            |
| 3:45 | SB             |                    | SINGING TO HER CHILD              |             |            |
| 3:50 | LB             |                    | STARTS SLEEPING                   |             |            |
| 3:55 | LB             |                    | SLEEPING                          |             |            |
| 4:00 | LB             |                    | SLEEPING                          |             |            |
| 4:05 | LB             |                    | SLEEPING                          |             |            |
| 4:10 | LB             |                    | SLEEPING                          |             |            |
| 4:15 | SB, LB         |                    | SLEEPING TOGETHER ON THE MAT      |             |            |
| 4:20 | SB, LB         |                    | SLEEPING TOGETHER ON THE MAT      |             |            |
| 4:25 | SB, LB         |                    | SLEEPING TOGETHER ON THE MAT      |             |            |
| 4:30 | SB             |                    | WAKES UP AND GOES TO THE BATHROOM |             |            |
| 4:35 | LB             |                    | SLEEPING                          |             |            |
| 4:40 | SB             |                    | FETCHING WATER FROM WATER POT     |             |            |
| 4:45 | SB             |                    | TAKES A BUCKET OF WATER OUTSIDE   |             |            |
| 4:50 | SB             |                    | CARRY'S HER CHILD ON THE BACK     |             |            |
| 4:55 | SB             |                    | CARRY'S HER CHILD ON THE BACK     |             |            |
| 5:00 | SB             |                    | DROPS HER CHILD ON THE MAT        |             |            |
| 5:05 | SB             |                    | STARTS SWEEPING                   |             |            |
| 5:10 | LB             |                    | PLAYING ON THE MAT                |             |            |
| 5:15 | LB             |                    | PLAYING ON THE MAT                |             |            |
| 5:20 | LB             |                    | STARTS CRYING                     |             |            |
| 5:25 | SB             | LB                 | BREASTFEEDING                     | BREAST MILK |            |
| 5:30 | SB             | LB                 | BREASTFEEDING                     | BREAST MILK |            |
| 5:35 | SB             | LB                 | BREASTFEEDING                     | BREAST MILK |            |
| 5:40 | SB             | LB                 | BREASTFEEDING                     | BREAST MILK |            |
| 5:45 | SB             |                    | KEEPS HER CHILD ON THE MAT        |             |            |
| 5:50 | SB             |                    | STARTS WASHING SOME PLATES        |             |            |

[illegible][illegible]

[illegible]

[illegible]

[illegible]

[illegible]

[illegible]

[illegible]



[illegible]

[illegible]

[illegible]

[illegible]

|  |  |  |  |  |  |
|--|--|--|--|--|--|
|  |  |  |  |  |  |
|  |  |  |  |  |  |
|  |  |  |  |  |  |
|  |  |  |  |  |  |
|  |  |  |  |  |  |
|  |  |  |  |  |  |
|  |  |  |  |  |  |
|  |  |  |  |  |  |
|  |  |  |  |  |  |
|  |  |  |  |  |  |

PARTICIPANT ID: \_\_\_\_\_

Primary Questions (Complete after you complete data collection):

From what you have seen observing THIS HOUSEHOLD, please answer the following questions in detail:

| Question                                                                                                                                                      | Write your <u>detailed</u> response here                                                                                                                                                                                                                                                                |
|---------------------------------------------------------------------------------------------------------------------------------------------------------------|---------------------------------------------------------------------------------------------------------------------------------------------------------------------------------------------------------------------------------------------------------------------------------------------------------|
| <p>1. In this household, what would be the best way(s) to give nutritional supplements such as an MNP to young children to ensure compliance?</p> <p>Why?</p> | <p>The best way to give mnp to young children should be in the morning when the child is hungry and ready to eat.</p> <p>Because semi-solid foods are prepared in the morning. The young children would comply because mnp would be unnoticeable in the kunu and the young children will drink all.</p> |
| <p>2. In this household, who is favored during meal preparation or feeding?</p>                                                                               | <p>The young children are favoured during meal preparation.</p>                                                                                                                                                                                                                                         |

|                                                                                                                                        |                                                                                                                                                                                                                                                                                                                                                                                                                 |
|----------------------------------------------------------------------------------------------------------------------------------------|-----------------------------------------------------------------------------------------------------------------------------------------------------------------------------------------------------------------------------------------------------------------------------------------------------------------------------------------------------------------------------------------------------------------|
| How is this favoritism expressed?                                                                                                      | They are served first and foremost before anyone else and they are served a huge portion of food on a large plate                                                                                                                                                                                                                                                                                               |
| <p>3. How could we promote the MNP supplement for this family that would attract their attention?</p> <p>Who would they listen to?</p> | <p>The mnp should be promoted through the oldest daughter and the mother. That way, their attention would be attracted.</p> <p>They would listen to either the oldest daughter or the mother because they stay at home all day and both of them are the ones that make decisions relating to meal preparation and decisions relating to the up keep of the household in general.</p>                            |
| <p>4. In this household, what would be the best ways to promote the MNP but limit how much it would be shared?</p> <p>Why?</p>         | <p>In this household, the best way to promote mnp is to instruct the mother on how to administer the mnp properly. She should be told that the product is meant for her young child who is 9 months.</p> <p>Because other children from the neighbours houses kept coming into the house to pick things. Some sit down to eat together with the children of this household. If not properly instructed, the</p> |

|                                                                                                                                                                                                                        |                                                                                                                                                                                                                                                                                                                                                                                                                                                                 |
|------------------------------------------------------------------------------------------------------------------------------------------------------------------------------------------------------------------------|-----------------------------------------------------------------------------------------------------------------------------------------------------------------------------------------------------------------------------------------------------------------------------------------------------------------------------------------------------------------------------------------------------------------------------------------------------------------|
|                                                                                                                                                                                                                        | <p>mother or the oldest child could share the product among the neighbours children or other children could easily access the place where the mnp is kept.</p>                                                                                                                                                                                                                                                                                                  |
| <p>5. What other issues and concerns did you see with this family that are important for us to consider with regard to introduction of an MNP?</p> <p>Why?</p>                                                         | <p>This household foods ranging from groundnut, guinea corn, millet and soya beans but do not know that it is important to use them in preparing meals. These foods are left in bays but not used to prepare meals.</p> <p>The mother prepared plain guinea corn kunu without adding groundnut paste into it for the young child. When asked, she said she doesn't know that she is supposed to use the groundnut paste in making kunu for the young child.</p> |
| <p>6. Based on your experience observing this child today, do you believe reactivity negatively impacted your ability to see the food-related behaviors of the child?</p> <p>Please explain your answer in detail.</p> | <p>There wasn't any form of reactivity to an extent.</p> <p>The mother was playing with the child too often and checking to know if i was watching. In general that did not affect my observation in any way.</p>                                                                                                                                                                                                                                               |
