# Supplementary material for: Acceptance and compliance with micronutrient powder (MNP) among children aged 6–23 months in northern Nigeria
Source: PLOS journal article supplement (doi:10.1371/journal.pgph.0000961), 2022-10-17
Supplement: S8 (10.1371/journal.pgph.0000961.s008) [file journal.pgph.0000961.s008]

## SPOT CHECK RECORDING FORM

State: Adamawa LGA: \_\_\_\_\_Song\_\_\_\_\_ Community: \_bongo \_

Name of caregiver (female): Celestina Ishaya

Name or caregiver (male): .....

Sex of index child: \_male\_ Age of index child (in months): \_11 months\_\_\_\_\_

### Spot Check Information

1. Date of MNP distribution to household (circle option below based on LGA name above):

🚦 **Kebbi:** BirninKebbi&Jega LGA: **June 16**

🚦 **Kebbi:** Danko-wasagu: **June 17**

🚦 **Adamawa:**Song, Ganye: **(June 18)**

🚦 **Adamawa:**Guyuk **June 19**

2. Date of Spot Check Observation: \_\_\_\_\_1/7/2015\_\_\_\_\_

3. Number of sachets remaining(Ask the caregiver to show you and count the specific number of sachets remaining):

45

4. Number of sachets that should remainusing one MNP sachet per day (Analyst only):

48

5. Number of sachets remaining / number of sachets should be remaining(Analyst only):

\_\_\_\_\_45\_\_\_\_\_ / \_\_\_\_\_48\_\_\_\_\_ = \_\_\_\_\_93.8\_\_\_\_\_ %

## **Probes**

**Question 1.** You have **XX** MNP sachets remaining. Explain how easy or difficult it was to use the MNP product on a daily basis for your child 6 – 23 months? (Circle one answer)

**Very Difficult**

**Difficult**

**(Easy)**

**Very Easy**

**Question 2.** Describe any specific challenges that you faced that made the MNP difficult to use on a daily basis?

There has not been any challenge in using the MNP daily. The only challenge now is that the child is ill. He does not eat much.

**Question 3.** Describe specific aspects of the MNP product that you or your child enjoyed that made it easier to use on a daily basis?

MNP has boost the child's appetite. He now eats more than he used to. The child has added weight.

**Question 4.** What questions do you have about the MNP based on your experience using it?

**NIL**

**Question 5.** What specific recommendations do you have that we can do as a program to make the MNP easier to use on a daily basis?

**NIL**
