# Supplementary material for: Acceptance and compliance with micronutrient powder (MNP) among children aged 6–23 months in northern Nigeria
Source: PLOS journal article supplement (doi:10.1371/journal.pgph.0000961), 2022-10-17
Supplement: S8 (10.1371/journal.pgph.0000961.s008) [file journal.pgph.0000961.s008]

## SPOT CHECK RECORDING FORM

State: Adamawa LGA: \_\_\_\_\_Song\_\_\_\_\_ Community: \_Wurokoncha\_

Name of caregiver (female): Nana Yakubu

Name or caregiver (male): .....

Sex of index child: \_female\_\_\_ Age of index child (in months): \_ 8 months\_\_\_\_\_

### Spot Check Information

1. Date of MNP distribution to household (circle option below based on LGA name above):

✚ Kebbi: BirninKebbi&Jega LGA: June 16

✚ Kebbi: Danko-wasagu: June 17

✚ Adamawa:Song, Ganye: (June 18)

✚ Adamawa:Guyuk June 19

2. Date of Spot Check Observation: \_\_\_\_\_5/7/2015\_\_\_\_\_

3. Number of sachets remaining(Ask the caregiver to show you and count the specific number of sachets remaining):

42

4. Number of sachets that should remainusing one MNP sachet per day (Analyst only):

44

5. Number of sachets remaining / number of sachets should be remaining(Analyst only):

\_\_\_\_\_42\_\_\_\_\_ / \_\_\_\_\_44\_\_\_\_\_ = 95.5\_\_\_\_\_ %

## **Probes**

**Question 1.** You have **XX** MNP sachets remaining. Explain how easy or difficult it was to use the MNP product on a daily basis for your child 6 – 23 months? (Circle one answer)

**Very Difficult**

**Difficult**

**(Easy)**

**(Very Easy)**

**Question 2.** Describe any specific challenges that you faced that made the MNP difficult to use on a daily basis?

None

**Question 3.** Describe specific aspects of the MNP product that you or your child enjoyed that made it easier to use on a daily basis?

- I notice that the baby sleeps more often
- I feel the baby is receiving additional care to grow properly
- I also feel the MNP will prevent some minor sickness from attacking the child

**Question 4.** What questions do you have about the MNP based on your experience using it?

- If these ones am using (MNP) is exhausted where can I get more
- If I mix the MNP inside the baby food and she did not finish the food at that time, will I still feed her the food mixed with MNP later or what should I do?

**Question 5.** What specific recommendations do you have that we can do as a program to make the MNP easier to use on a daily basis?

If there can be jingles on radio to remind most mothers not to forget to give their baby's the MNP on a daily basis
