# Supplementary material for: Acceptance and compliance with micronutrient powder (MNP) among children aged 6–23 months in northern Nigeria
Source: PLOS journal article supplement (doi:10.1371/journal.pgph.0000961), 2022-10-17
Supplement: S8 (10.1371/journal.pgph.0000961.s008) [file journal.pgph.0000961.s008]

## SPOT CHECK RECORDING FORM

State: Adamawa LGA: \_\_\_\_\_ Song \_\_\_\_\_ Community: \_Galamba \_

Name of caregiver (female): Salama Abednego

Name or caregiver (male): .....

Sex of index child: \_male\_ Age of index child (in months): \_17 months\_\_\_\_\_

### Spot Check Information

1. Date of MNP distribution to household (circle option below based on LGA name above):

🚦 **Kebbi:** BirninKebbi&Jega LGA: **June 16**

🚦 **Kebbi:** Danko-wasagu: **June 17**

🚦 **Adamawa:**Song, Ganye: **(June 18)**

🚦 **Adamawa:**Guyuk **June 19**

2. Date of Spot Check Observation: \_\_\_\_\_4/7/2015\_\_\_\_\_

3. Number of sachets remaining(Ask the caregiver to show you and count the specific number of sachets remaining):

42

4. Number of sachets that should remainusing one MNP sachet per day (Analyst only):

45

5. Number of sachets remaining / number of sachets should be remaining(Analyst only):

\_\_\_\_\_42\_\_\_\_\_ / \_\_\_\_\_45\_\_\_\_\_ = \_\_\_\_\_93.3\_\_\_\_\_ %

## **Probes**

**Question 1.** You have **XX** MNP sachets remaining. Explain how easy or difficult it was to use the MNP product on a daily basis for your child 6 – 23 months? (Circle one answer)

**Very Difficult**

**Difficult**

**(Easy)**

**(Very Easy )**

**Question 2.** Describe any specific challenges that you faced that made the MNP difficult to use on a daily basis?

- Increase in food consumption.
- The boy looks more heavy in weight
- I always have the feeling that my child is consuming a drug daily that will make him stay healthy always

**Question 3.** Describe specific aspects of the MNP product that you or your child enjoyed that made it easier to use on a daily basis?

- What is the benefits of this MNP in the body of the child.
- Would this MNP be sold or distributed free

**Question 4.** What questions do you have about the MNP based on your experience using it?

**NIL**

**Question 5.** What specific recommendations do you have that we can do as a program to make the MNP easier to use on a daily basis?

**NIL**
