# Supplementary material for: Acceptance and compliance with micronutrient powder (MNP) among children aged 6–23 months in northern Nigeria
Source: PLOS journal article supplement (doi:10.1371/journal.pgph.0000961), 2022-10-17
Supplement: S8 (10.1371/journal.pgph.0000961.s008) [file journal.pgph.0000961.s008]

### 1.1.1 Instrument F –Direct Observation Form

#### <<Instrument F Direct Observation Form>>

**PI Name:** PragmaMathema,Stephen Kodish

**Study Title:** Formative research to develop an infant and young child feeding (IYCF) intervention with micronutrient powder (MNP) for children aged 6 – 23 months

**PI Version/Date:** Version1.0/January 24, 2015

Date: \_June 23, 2015\_\_\_\_\_Location: \_ Ganwoki community, GANYE, LGA\_

Data Collector: Aisha Aliyu Dahiru\_\_\_\_Participant ID: \_Round hut with mango tree in front

Main goals of this direct observation are to answer the following questions:

1. In this household, what would be the best way(s) to give nutritional supplements to young children? Why?
2. In this household, describe the food sharing that you observe throughout the meal. Are there any predictable patterns?
3. In this household, who is favored and how is this favoritism expressed during meal preparation and eating?

(TEAR OFF AT PERFORATED DOTTED LINE BELOW)

-----

PARTICIPANT ID: \_\_\_\_

Household Composition Table (Fill out as you do data collection)

| INITIALS | SEX (M/F) | AGE (estimated) | Relationship to household | Description                                 |
|----------|-----------|-----------------|---------------------------|---------------------------------------------|
| W        | F         | 26YRS           | Mother                    | Wearing pink wrapper agnd cream shirt.      |
| C        | M         | 13 MONTHS       | Baby boy (son)            | Wearing white sweater                       |
| H        | M         | 34 YEARS        | Husband                   | Wearin brown kaftan and white boots         |
| OC       | F         | 11 YEARS        | Daughter                  | Wearing black shirt and green wrapper       |
| N1       | F         | 27YEARS         | Mother friend             | Wearing orange wrapper with brown head gear |
| N2       | M         | 30 YEARS        | Husband's sister          | Wearing orange shirt and black trouser gear |
| G        | F         | 15YRS           | Wife sister               | Wearing blue dress                          |

|    |   |          |                  |                                       |
|----|---|----------|------------------|---------------------------------------|
|    |   |          |                  |                                       |
| B1 | M | 6 years  | Daughter         | Wearing brown kaftan and black cup    |
| B2 | M | 4 years  | Son              | Wearing blue sweat shirt              |
| N3 | M | 21 years | Husband's nephew | Wearing ash cloth                     |
| N4 | F | 30 years | Neighbour        | Wearing green shirt and brown wrapper |
|    |   |          |                  |                                       |
|    |   |          |                  |                                       |
|    |   |          |                  |                                       |
|    |   |          |                  |                                       |
|    |   |          |                  |                                       |

PARTICIPANT ID: \_\_\_\_\_

| TIME | ACTOR INITIALS | RECIPIENT INITIALS | WHAT HAPPENED                               | FOOD | Reactivity |
|------|----------------|--------------------|---------------------------------------------|------|------------|
| 8:00 | M              | C                  | Carrying baby on laps                       |      |            |
| 8:05 | M              | C                  | Carrying baby on laps                       |      |            |
| 8:05 | OC             |                    | Sweeping the verandah                       |      |            |
| 8:10 | OC             |                    | Sweeping the verandah                       |      |            |
| 8:15 | M              | C                  | Breastfeeding the baby                      |      |            |
| 8:20 | M              | C                  | Breastfeeding the baby                      |      |            |
| 8:25 | H              |                    | Comes into the house holding a radio        |      |            |
| 8:30 | C              |                    | Playing on the mother's lap and pointing    |      |            |
| 8:35 | M              | C                  | Breastfeeding the baby                      |      |            |
| 8:35 | OC             |                    | Mopping the verandah                        |      |            |
| 8:35 | H              |                    | Comes out of the room holding radio and hoe |      |            |
| 8:40 | H              | M                  | Chatting with mother                        |      |            |

| TIME  | ACTOR INITIALS | RECIPIENT INITIALS | WHAT HAPPENED                                         | FOOD       | Reactivity |
|-------|----------------|--------------------|-------------------------------------------------------|------------|------------|
| 08:45 | H              | M                  | Chatting with mother                                  |            |            |
| 08:50 | H              |                    | Goes out talking about the heavy rainfall             |            |            |
| 08:55 | B1             |                    | Washing his feet                                      |            |            |
| 08:55 | B2             |                    | Playing with baby under the shade                     |            |            |
| 09:00 | C              |                    | Running around                                        |            |            |
| 09:00 | H              |                    | Comes in and changes clothes                          |            |            |
| 09:05 | H              |                    | Picks up cutlass, hoe and his radio and goes out      |            |            |
| 09:05 | H              | M                  | Telling mother to ensure she gives the child MNP      |            |            |
| 09:10 | M              | OC                 | Chatting with daughter                                |            |            |
| 09:15 | M              |                    | Bring out flask and cup from the room                 |            |            |
| 09:15 | M              |                    | Serve a portion of kunu from flask into a cup         | Kunu gyada |            |
| 09:20 | M              |                    | Adds MNP into the Kunu                                | Kunu gyada |            |
| 09:20 | M              |                    | Mixing the MNP ensuring it blends into the Kunu       | Kunu gyada |            |
| 09:25 | M              | C                  | Feeding the baby kunu with spoon                      | Kunu gyada |            |
| 09:26 | M              | C                  | Feeding the baby                                      | Kunu gyada |            |
| 09:27 | M              | C                  | Feeding the baby. The other children were not present | Kunu gyada |            |
| 09:28 | C              |                    | Opening mouth to be fed eager to accept the kunu      | Kunu gyada |            |
| 09:29 | M              | C                  | Feeding the baby                                      | Kunu gyada |            |
| 09:30 | M              | C                  | Feeding the baby                                      | Kunu gyada |            |
| 09:35 | M              | C                  | Washing the baby's hands and mouth                    |            |            |
| 09:40 | M              | C                  | Carrying the baby on her lap                          |            |            |

| TIME  | ACTOR INITIALS | RECIPIENT INITIALS | WHAT HAPPENED                                      | FOOD        | Reactivity |
|-------|----------------|--------------------|----------------------------------------------------|-------------|------------|
| 09:40 | M              | C                  | Playing with baby                                  |             |            |
| 09:40 | N1             | M                  | Comes in greeting the mother                       |             |            |
| 09:40 | M              | N1                 | Chatting with friend                               |             |            |
| 09:40 | G              |                    | Picking groundnut in a large bowl                  |             |            |
| 09:45 | M              | N1                 | Chatting with friends                              |             |            |
| 09:45 | OC             |                    | Getting ready for school                           |             |            |
| 09:50 | M              | C                  | Breastfeeding baby                                 | Breast milk |            |
| 09:55 | M              | C                  | Breastfeeding baby                                 | Breast milk |            |
| 09:55 | C              |                    | Playing on mother's lap                            |             |            |
| 10:00 | C              |                    | Playing on mother's lap                            |             |            |
| 10:05 | G              |                    | Picking utensils around the house into the kitchen |             |            |
| 10:05 | B2             | C                  | Playing with the baby                              |             |            |
| 10:10 | C              |                    | Crying                                             |             |            |
| 10:10 | M              | C                  | Pick up the baby and consoling baby on her lap     |             |            |
| 10:15 | M              | C                  | Breastfeeding baby                                 | Breast milk |            |
| 10:20 | N2             | M                  | Comes in greeting mother                           |             |            |
| 10:20 | M              | N2                 | Chatting with husband's brother                    |             |            |
| 10:25 | M              | N2                 | Chatting with husband's brother                    |             |            |
| 10:30 | N2             |                    | Exiting the house                                  |             |            |
| 10:30 | M              | C                  | Washing the baby                                   |             |            |
| 10:30 | C              |                    | Baby crying                                        |             |            |
| 10:35 | M              | C                  | Consoling baby                                     |             |            |
| 10:40 | N3             | M                  | Comes into house greeting mother                   |             |            |
| 10:40 | N3             | M                  | Chatting with mother                               |             |            |
| 10:45 | M              | N3                 | Chatting with husband's nephew                     |             |            |
| 10:50 | M              | C                  | Breastfeeding baby                                 | Breast milk |            |
| 10:55 | M              | C                  | Laying with baby on her lap                        |             |            |
| 10:55 | M              | C                  | Breastfeeding baby                                 | Breast milk |            |
| 10:56 | M              | C                  | Breastfeeding baby                                 | Breast milk |            |
| 10:57 | M              | C                  | Breastfeeding baby                                 | Breast      |            |

| TIME  | ACTOR INITIALS | RECIPIENT INITIALS | WHAT HAPPENED                                                  | FOOD         | Reactivity |
|-------|----------------|--------------------|----------------------------------------------------------------|--------------|------------|
|       |                |                    |                                                                | milk         |            |
| 10:58 | M              | C                  | Breastfeeding baby                                             | Breast milk  |            |
| 10:59 | M              | C                  | Breastfeeding baby                                             | Breast milk  |            |
| 11:00 | M              | C                  | Carrying baby on her back                                      |              |            |
| 11:05 | M              | C                  | Carrying baby on her back                                      |              |            |
| 11:10 | M              | C                  | Carrying baby on her back                                      |              |            |
| 11:10 | M              |                    | Washing utensils that was left under the rain                  |              |            |
| 11:15 | M              |                    | Goes into the room and brings clothes out                      |              |            |
| 11:15 | M              |                    | Soaking clothes and utensil in a large bowl                    |              |            |
| 11:20 | M              |                    | Carrying baby on her back                                      |              |            |
| 11:20 | M              |                    | Picking utensils around the house                              |              |            |
| 11:25 | M              | C                  | Carrying baby on her back                                      |              |            |
| 11:25 | B2             |                    | Sitting under the shade playing                                |              |            |
| 11:30 | M              |                    | Bringing out fruit from the kitchen and hangs on veranda       | Local grapes |            |
| 11:35 | C              |                    | Humming on mother's back                                       |              |            |
| 11:35 | M              |                    | Moving bags from one corner of the room to the other           |              |            |
| 11:40 | N4             |                    | Comes into the house holding a bucket                          |              |            |
| 11:40 | M              | N4                 | Chatting with neighbor                                         |              |            |
| 11:45 | M              | N4                 | Chatting with neighbor                                         |              |            |
| 11:45 | M              |                    | Carrying baby on her back                                      |              |            |
| 11:50 | M              | N4                 | handing neighbor utensils used for drawing water from the well |              |            |
| 11:50 | N4             |                    | Goes out chatting with mother                                  |              |            |
| 11:50 | M              | N4                 | Going out with neighbor                                        |              |            |
| 11:50 | M              | C                  | Carrying baby on her back                                      |              |            |
| 11:55 | M              | N4                 | Chatting with neighbor near the well in front of house         |              |            |
| 11:55 | M              | N4                 | Chatting with neighbor                                         |              |            |

| TIME  | ACTOR INITIALS | RECIPIENT INITIALS | WHAT HAPPENED                                             | FOOD        | Reactivity |
|-------|----------------|--------------------|-----------------------------------------------------------|-------------|------------|
| 12:00 | M              | N4                 | Chatting with neighbor                                    |             |            |
| 12:05 | M              | C                  | Carrying the baby on her back walking back into the house |             |            |
| 12:10 | M              | G                  | Chatting with sister                                      |             |            |
| 12:15 | M              | G                  | Chatting with sister                                      |             |            |
| 12:15 | M              | C                  | Brings baby down from back                                |             |            |
| 12:15 | M              |                    | Spreads wrapper on the veranda and lays down              |             |            |
| 12:15 | M              | C                  | Lie baby down beside her                                  |             |            |
| 12:20 | M              | C                  | Breastfeeding baby                                        | Breast milk |            |
| 12:25 | M              | C                  | Breast feeding baby                                       | Breast milk |            |
| 12:25 | M              | G                  | Chatting with sister                                      |             |            |
| 12:30 | M              | G                  | Chatting sister                                           |             |            |
| 12:35 | M              | C                  | Playing with the baby                                     |             |            |
| 12:40 | M              | C                  | Playing with baby                                         |             |            |
| 12:45 | M              | G                  | Chatting with sister                                      |             |            |
| 12:45 | M              | C                  | Playing with baby                                         |             |            |
| 12:50 | C              |                    | Running around the veranda laughing                       |             |            |
| 12:55 | C              |                    | Following mother into the room                            |             |            |
| 12:55 | M              | B2                 | Mother serving kunu to the older son                      | Kunun gyada |            |
| 12:55 | B2             |                    | Sitting and drinking kunu                                 | Kunu gyada  |            |
| 12:55 | C              |                    | Sitting beside brother playing with cap                   |             |            |
| 01:00 | B2             | C                  | Offering kunu to the baby                                 |             |            |
| 01:00 | C              |                    | Refusing to take kunu from brother                        |             |            |

| TIME  | ACTOR INITIALS | RECIPIENT INITIALS | WHAT HAPPENED                                                  | FOOD | Reactivity |
|-------|----------------|--------------------|----------------------------------------------------------------|------|------------|
| 01:00 | M              |                    | Folding clothes on the bed                                     |      |            |
| 01:00 | C              | C                  | Following mother around the house (from one room to the other) |      |            |
| 01:05 | M              | C                  | Picking clothes from one room to the other                     |      |            |
| 01:10 | M              | C                  | Carrying baby                                                  |      |            |
| 01:15 | M              | C                  | Brings down baby in the room                                   |      |            |
| 01:15 | M              |                    | Picking clothes from room to veranda                           |      |            |
| 01:20 | M              | C                  | Changing baby's clothes                                        |      |            |
| 01:20 | M              |                    | Folding clothes                                                |      |            |
| 01:20 | B2             |                    | Finished drinking kunu and take cup into the kitchen           |      |            |
| 01:20 | B2             |                    | Joining mother and baby in the room                            |      |            |
| 01:25 | B2             | C                  | Playing with baby in the room                                  |      |            |
| 01:30 | B2             | C                  | Playing with baby in the room                                  |      |            |
| 01:35 | B2             | C                  | Playing with baby in the room                                  |      |            |
| 01:40 | B2             | C                  | Playing with baby in the room                                  |      |            |
| 01:40 | G              |                    | Sitting on the veranda                                         |      |            |
| 01:40 | M              |                    | Folding clothes in the room                                    |      |            |
| 01:45 | B2             | C                  | Playing with baby in the room                                  |      |            |
| 01:45 | M              |                    | Bringing out more clothes to the veranda                       |      |            |
| 01:50 | C              |                    | Playing with brother and giggling                              |      |            |
| 01:50 | B2             | C                  | Playing with baby                                              |      |            |
| 01:55 | C              |                    | Giggling and peeping outside                                   |      | R          |
| 02:00 | B2             | C                  | Playing with baby at the veranda                               |      | R          |
| 02:00 | M              | G                  | Chatting with sister                                           |      |            |
| 02:05 | C              |                    | Running around and screaming loudly                            |      | R          |
| 2:10  | B2             | C                  | Playing with baby in the room                                  |      |            |
| 02:10 | M              |                    | Sweeping the room                                              |      |            |
| 02:10 | B2             | C                  | Playing at the veranda with baby                               |      |            |
| 02:15 | M              |                    | Sweeping the room                                              |      |            |
| 02:15 | G              | B2,C               | Playing with the children                                      |      |            |
| 02:20 | M              |                    | Sweeping the veranda                                           |      |            |
| 02:20 | G              | B2, C              | Playing with the children                                      |      |            |
| 02:25 | M              |                    | Sweeping the surrounding                                       |      |            |

| TIME  | ACTOR INITIALS | RECIPIENT INITIALS | WHAT HAPPENED                                  | FOOD | Reactivity |
|-------|----------------|--------------------|------------------------------------------------|------|------------|
| 02:25 | M              | G                  | Chatting with sister                           |      |            |
| 02:30 | M              |                    | Sweeping the surrounding                       |      |            |
| 02:35 | B2             | C                  | Playing around with the baby at the veranda    |      |            |
| 02:35 | M              |                    | Sweeping the surrounding                       |      |            |
| 02:40 | C              |                    | Running around, screaming and laughing         |      |            |
| 02:45 | C              |                    | Running around, screaming and laughing         |      |            |
| 02:45 | B2             | C                  | Running around with the baby screaming         |      | R          |
| 02:45 | M              |                    | Sweeping the surrounding                       |      |            |
| 02:50 | B2             | C                  | Playing in the room with the baby              |      |            |
| 02:50 | M              |                    | Sweeping the surrounding                       |      |            |
| 02:50 | M              |                    | Washing hands after sweeping                   |      |            |
| 02:50 | G              |                    | Picking beans in a silver utensils             |      |            |
| 02:50 | M              |                    | Resting at the veranda with baby and older son |      |            |
| 02:50 | B2             | C                  | Playing with baby                              |      |            |
| 02:55 | M              | C                  | Carrying baby on her lap                       |      |            |
| 02:55 | M              | C                  | Breastfeeding baby                             |      |            |
| 03:00 | B2             | C                  | Playing with baby near the mother              |      |            |
| 03:05 | B2             | C                  | Playing with baby in the room                  |      |            |
| 03:05 | M              | G                  | Chatting with sister                           |      |            |
| 03:10 | B2             | C                  | Playing with baby in the room                  |      |            |
| 03:15 | M              |                    | Loosening plaited hair                         |      |            |
| 03:20 | C              | M                  | Playing with mother's hair                     |      |            |
| 03:25 | C              |                    | Playing with brother                           |      |            |
| 03:30 | C              |                    | Standing beside mother quietly                 |      |            |
| 03:35 | C              | M                  | Playing with mother's hair                     |      |            |
| 03:35 | M              |                    | Loosening plaited hair                         |      |            |
| 03:35 | M              | G                  | Chatting with sister                           |      |            |
| 03:40 | G              | C                  | Carrying baby on lap                           |      |            |
| 03:40 | G              | C                  | Playing with baby. Lifting baby up and down.   |      |            |
| 03:45 | M              | C                  | Carrying baby on her laps                      |      |            |
| 03:50 | C              | B2                 | Hit brother playfully with comb                |      |            |
| 03:50 | B2             | C                  | Play and running around with baby              |      |            |
| 03:55 | M              |                    | Combing hair                                   |      |            |
| 04:00 | C              | B2                 | Hit brother playfully with comb                |      |            |



| TIME  | ACTOR INITIALS | RECIPIENT INITIALS | WHAT HAPPENED                                                     | FOOD  | Reactivity |
|-------|----------------|--------------------|-------------------------------------------------------------------|-------|------------|
| 04:05 | G              | C                  | Carrying baby on her lap                                          |       |            |
| 04:10 | B2             | C                  | Playing with baby                                                 |       | R          |
| 04:15 | B2             | C                  | Playing with baby                                                 |       | R          |
| 04:15 | M              | G                  | Chatting with sister                                              |       |            |
| 04:20 | B2             | C                  | Playing hide and seek with baby                                   |       |            |
| 04:25 | B2             | C                  | Playing and running around with baby                              |       | R          |
| 04:30 | M              | C                  | Giving baby water to drink in a cup                               | water |            |
| 04:35 | G              | B2,C               | Playing with children in the room                                 |       |            |
| 04:40 | G              | B2,C               | Playing with children in the room                                 |       |            |
| 04:45 | B2             |                    | Running out of the house giggling                                 |       |            |
| 04:50 | G              | C                  | Playing with baby in the room                                     |       |            |
| 04:55 | M              |                    | Loosening hair                                                    |       |            |
| 04:55 | M              | G                  | Chatting with sister                                              |       |            |
| 05:00 | G              | M                  | Shuffling through pictures and chatting with sister               |       |            |
| 05:00 | C              |                    | Playing with some pictures while going up and down in the veranda |       |            |
| 05:05 | C              | M                  | Pointing out picture to mother and screaming                      |       |            |
| 05:10 | M              | C                  | Carrying baby on her lap                                          |       |            |
| 05:10 | M              | G                  | Chatting with sister                                              |       |            |
| 05:15 | C              | M,G                | Pointing out picture and screaming to mother and aunt             |       |            |
| 05:20 | C              |                    | Lying down beside mother at the veranda                           |       |            |
| 05:20 | M              | G,B2,B1            | Chatting with sister and children                                 |       |            |
| 05:25 | C              |                    | Sleeping beside mother                                            |       |            |
| 05:30 | C              |                    | Baby is sleeping                                                  |       |            |
| 05:35 | C              |                    | Baby sleeping                                                     |       |            |
| 05:40 | C              |                    | Baby sleeping                                                     |       |            |
| 05:45 | C              |                    | Baby wakes up                                                     |       |            |

| TIME  | ACTOR INITIALS | RECIPIENT INITIALS | WHAT HAPPENED                                                     | FOOD                                       | Reactivity |
|-------|----------------|--------------------|-------------------------------------------------------------------|--------------------------------------------|------------|
|       |                |                    |                                                                   |                                            |            |
| 05:45 | M              | C                  | Carrying baby on her lap                                          |                                            |            |
| 05:50 | M              | C                  | Giving baby kunu in a small cup while sitting on her lap          | Kunu gyada                                 |            |
| 05:51 | M              | C                  | Feeding baby with kunu on her lap                                 | Kunu gyada                                 |            |
| 05:52 | M              | C                  | Feeding baby with kunu without forcing the baby                   | Kunu gyada                                 |            |
| 05:53 | M              | C                  | Feeding baby kunu                                                 | Kunu gyada                                 |            |
| 05:54 | M              | C                  | Feeding baby with kunu                                            | Kunu gyada                                 |            |
| 05:55 | M              | C                  | Feeding baby with kunu                                            | Kunu gyada                                 |            |
| 05:56 | M              | C                  | Washing baby's hands and mouths                                   |                                            |            |
| 05:56 | M              |                    | Starting fire                                                     |                                            |            |
| 06:01 | M              |                    | Starting fire                                                     |                                            |            |
| 06:06 | M              |                    | Placing pot with water on fire                                    | Water                                      |            |
| 06:06 | M              |                    | Covering pot                                                      |                                            |            |
| 06:11 | M              |                    | Adding guinea corn flour to water on fire to make meal            | Guinea corn flour, water                   |            |
| 06:16 | M              |                    | Meal is ready to be served                                        | Tuwon dawa                                 |            |
| 06:21 | M              |                    | Placing another pot of soup on fire                               | Miyan kuka                                 |            |
| 06:26 | M              |                    | Soup is ready                                                     |                                            |            |
| 06:31 | M              |                    | Serving tuwo in a large bowl and soup in a separate bowl          | Tuwon dawa, baobab soup                    |            |
| 06:31 | G              |                    | Placing pot with water on the fire                                | Water                                      |            |
| 06:36 | G              |                    | Mixing groundnut paste and guinea corn flour in a bowl with water | Guinea corn flour, ground nut paste, water |            |

| TIME  | ACTOR INITIALS | RECIPIENT INITIALS | WHAT HAPPENED                                                                          | FOOD       | Reactivity |
|-------|----------------|--------------------|----------------------------------------------------------------------------------------|------------|------------|
| 06:41 | G              |                    | Adding guinea corn flour and groundnut paste mixture to the boiling water to make kunu |            |            |
| 06:46 | G              |                    | Kunu is ready to be served                                                             | Kunu gyada |            |
| 06:51 | G              |                    | Serving kunu into flask and keep aside                                                 | Kunu gyada |            |
| 06:51 | C              |                    | Baby sleeping                                                                          |            |            |
| 06:56 | C              |                    | Baby sleeping                                                                          |            |            |

PARTICIPANT ID: \_\_ Round hut with mango tree in front

Primary Questions (Complete after you complete data collection):

From what you have seen observing THIS HOUSEHOLD, please answer the following questions in detail:

| Question                                                                                                                                               | Write your <u>detailed</u> response here                                                                                                                                                                                        |
|--------------------------------------------------------------------------------------------------------------------------------------------------------|---------------------------------------------------------------------------------------------------------------------------------------------------------------------------------------------------------------------------------|
| 1. In this household, what would be the best way(s) to give nutritional supplements such as an MNP to young children to ensure compliance?<br><br>Why? | The baby is fed separately. The mother and sister can be trained on how to use MNP because in the mother's absence the sister is the one taking care of the baby and also administer the MNP.                                   |
| 2. In this household, who is favored during meal preparation or feeding?<br><br>How is this favoritism expressed?                                      | The parents and older children were favored during meal preparation because the meal prepared was solid. Even though a semisolid food was prepared the younger children were also given the semisolid food as well as the baby. |
| 3. How could we promote the MNP supplement for this family that would attract their attention?                                                         | MNP can be promoted to this family through the mother and sister.<br>The father is in charge of all decisions in the household so he might serve as an influence in promoting MNP .                                             |

|                                                                                                                                                                                                                        |                                                                                                                                                                                                                                                                                                                                                                                                          |
|------------------------------------------------------------------------------------------------------------------------------------------------------------------------------------------------------------------------|----------------------------------------------------------------------------------------------------------------------------------------------------------------------------------------------------------------------------------------------------------------------------------------------------------------------------------------------------------------------------------------------------------|
| Who would they listen to?                                                                                                                                                                                              | <p>The community leader can also serve as an influence because his wife is a friend to the mother of the household and when she visited they were discussing about ways to promote MNP in the community.</p> <p>The radio can also be used to promote the MNP because the man was listening to the radio when he came into the house.</p>                                                                |
| <p>4. In this household, what would be the best ways to promote the MNP but limit how much it would be shared?</p> <p>Why?</p>                                                                                         | <p>Ensure the mother understands MNP is meant for her 11 months old baby only and should not be shared with other children because it will only benefit the baby and not the rest.</p> <p>Ensure the mother feeds the child the MNP separately and ensure the baby eats the entire portion that is mixed with MNP. The child should be fed before or after the parent and older children have eaten.</p> |
| <p>5. What other issues and concerns did you see with this family that are important for us to consider with regard to introduction of an MNP?</p> <p>Why?</p>                                                         | <p>There are no concerns or issues with regard to introduction to MNP in this household.</p> <p>The mother maintains good hygiene and there is adequate food in the household. The baby consumed the portion of kunu that was mixed with MNP with no difficulties.</p>                                                                                                                                   |
| <p>6. Based on your experience observing this child today, do you believe reactivity negatively impacted your ability to see the food-related behaviors of the child?</p> <p>Please explain your answer in detail.</p> | <p>There was no reactivity during food related behavior. The reactivity witnessed was when the child was playing with his mother and older son. The child ate his meal without noticing data collector presence. It is only after eating that he kept playing around near data collector.</p>                                                                                                            |
