# Supplementary material for: Acceptance and compliance with micronutrient powder (MNP) among children aged 6–23 months in northern Nigeria
Source: PLOS journal article supplement (doi:10.1371/journal.pgph.0000961), 2022-10-17
Supplement: S8 (10.1371/journal.pgph.0000961.s008) [file journal.pgph.0000961.s008]

## SPOT CHECK RECORDING FORM

State: ADAMAWA LGA: GANYE Community: SUGU

NAME OF CAREGIVER(FEMALE)MAGDALENE  
MOSES.....

Sex of index child: M Age of index child (in months):  
7

### Spot Check Information

1. Date of MNP distribution to household (circle option below based on LGA name above):

 **Kebbi:** BirninKebbi&Jega LGA: **June 16**

 **Kebbi:** Danko-wasagu: **June 17**

 **Adamawa:**Song, Ganye: **June 18**

 **Adamawa:**Guyuk **June 19**

2. Date of Spot Check Observation: 9-07-2015

3. Number of sachets remaining(Ask the caregiver to show you and count the specific number of sachets remaining):

41

4. Number of sachets that should remainusing one MNP sachet per day (Analyst only):

40

5. Number of sachets remaining / number of sachets should be remaining(Analyst only):

41 / 40 = 102.5 %

### Probes

**Question 1.** You have **XX** MNP sachets remaining. Explain how easy or difficult it was to use the MNP product on a daily basis for your child 6 – 23 months? (Circle one answer)

**Very Difficult**

**Difficult**

**Easy**

**Very Easy**

**Question 2.** Describe any specific challenges that you faced that made the MNP difficult to use on a daily basis? NONE AT ALL

**Question 3.** Describe specific aspects of the MNP product that you or your child enjoyed that made it easier to use on a daily basis? THE CHILD EATS MORE MEAL THAN BEFORE.....HE HAS ADDED MORE STRENGTH AND WEIGHT.....

**Question 4.** What questions do you have about the MNP based on your experience using it?

**DOES THE MNP POWDER HELPS DESTROY WORMS IN A CHILD.?**

**Question 5.** What specific recommendations do you have that we can do as a program to make the MNP easier to use on a daily basis? YOU CAN DEVELOP A JINGLE ON RADIO THAT WILL KEEP REMINDING MOTHERS ON A DAILY BASIS, SECONDLY, THEY CAN INVOLVE THE RELIGIOUS LEADERS, SO THAT EVERY SUNDAY DURING WORSHIP, THEY CAN ALWAYS PASS AN ANNOUNCEMENTS REMINDING MOTHERS.
