# Supplementary material for: Acceptance and compliance with micronutrient powder (MNP) among children aged 6–23 months in northern Nigeria
Source: PLOS journal article supplement (doi:10.1371/journal.pgph.0000961), 2022-10-17
Supplement: S8 (10.1371/journal.pgph.0000961.s008) [file journal.pgph.0000961.s008]

## SPOT CHECK RECORDING FORM

State: Adamawa LGA: \_\_\_\_Song\_\_\_\_ Community: \_Bongo\_

Name of caregiver (female): Talatu Babagari

Name or caregiver (male): .....

Sex of index child: \_Male\_\_\_\_ Age of index child (in months): \_22 months\_\_\_\_

### Spot Check Information

1. Date of MNP distribution to household (circle option below based on LGA name above):

✚ Kebbi: BirninKebbi&Jega LGA: June 16

✚ Kebbi: Danko-wasagu: June 17

✚ Adamawa:Song, Ganye: (June 18)

✚ Adamawa:Guyuk June 19

2. Date of Spot Check Observation: \_\_\_\_5/7/2015\_\_\_\_

3. Number of sachets remaining(Ask the caregiver to show you and count the specific number of sachets remaining):

42

4. Number of sachets that should remainusing one MNP sachet per day (Analyst only):

44

5. Number of sachets remaining / number of sachets should be remaining(Analyst only):

\_\_\_\_42\_\_\_\_ / \_\_\_\_44\_\_\_\_ = \_95.5\_\_\_\_ %

## **Probes**

**Question 1.** You have **XX** MNP sachets remaining. Explain how easy or difficult it was to use the MNP product on a daily basis for your child 6 – 23 months? (Circle one answer)

**Very Difficult**

**Difficult**

**(Easy)**

**Very Easy**

**Question 2.** Describe any specific challenges that you faced that made the MNP difficult to use on a daily basis?

I wouldn't say it is a challenge but unsealing the sachet is somehow difficult for me. Some days I use my teeth and the powder may pour on the ground.

**Question 3.** Describe specific aspects of the MNP product that you or your child enjoyed that made it easier to use on a daily basis?

The fact that the product does not taste bitter is very satisfactory to me because our children usually reject anything that is bitter.

**Question 4.** What questions do you have about the MNP based on your experience using it?

- Should I or can I use the MNP and still give my child other syrup like paracetamol or cough syrup. I wouldn't want other syrup to reduce the efficacy of the MNP. I want to be sure

**Question 5.** What specific recommendations do you have that we can do as a program to make the MNP easier to use on a daily basis?

Yes the sachet should be together to unseal, and also the size should be increase a little bit. Aside from these two comments I have no other concern
