# Supplementary material for: Acceptance and compliance with micronutrient powder (MNP) among children aged 6–23 months in northern Nigeria
Source: PLOS journal article supplement (doi:10.1371/journal.pgph.0000961), 2022-10-17
Supplement: S8 (10.1371/journal.pgph.0000961.s008) [file journal.pgph.0000961.s008]

### 1.1.1 Instrument F –Direct Observation Form

#### <<Instrument F Direct Observation Form>>

**PI Name:** PragmaMathema, Stephen Kodish

**Study Title:** Formative research to develop an infant and young child feeding (IYCF) intervention with micronutrient powder (MNP) for children aged 6 – 23 months

**PI Version/Date:** Version1.0/January 24, 2015

Date: 27/06/2015 Location: Rafin Gora

Data Collector: Samira Usman

Main goals of this direct observation are to answer the following questions:

1. In this household, what would be the best way(s) to give nutritional supplements to young children? Why?
2. In this household, describe the food sharing that you observe throughout the meal. Are there any predictable patterns?
3. In this household, who is favored and how is this favoritism expressed during meal preparation and eating?

Household Composition Table (Fill out as you do data collection)

| INITIALS | SEX (M/F) | AGE (estimated) | Relationship to household | Description                                                                                                |
|----------|-----------|-----------------|---------------------------|------------------------------------------------------------------------------------------------------------|
| MM       | F         | 28yrs           | Mother                    | Average height, blue yellow wrapper (Ankara) and blue short with black and white strike head tie and hijab |
| BB       | F         | 17months        | Daughter                  | Dark, wearing pink sleeveless and short                                                                    |
| FF       | M         | 36yrs           | Father                    | Tall dark wearing brown trousers, top and cap                                                              |
| BB2      | M         | 1yr             | son                       | Dark wearing black trousers and green top                                                                  |
| GM       | F         | 50yrs           | Grand mother              | Tall dark wearing wrapper and head tie (Ankara)                                                            |
| TB       | M         | 12yrs           | Mothers brother           | Tall, dark boy wearing a flowery shirt and black jeans short                                               |
| NB       | F         | 29yrs           | Neighbor                  | Average height wearing yellow and blue wrapper, red and black top with black head tie                      |
| SB       | M         | 3.5 yrs         | Neighbor son              | Wearing black and white short and black                                                                    |

|  |  |  |  |       |
|--|--|--|--|-------|
|  |  |  |  | jeans |
|  |  |  |  |       |
|  |  |  |  |       |
|  |  |  |  |       |
|  |  |  |  |       |
|  |  |  |  |       |
|  |  |  |  |       |
|  |  |  |  |       |

| TIME | ACTOR INITIALS | RECIPIENT INITIALS | WHAT HAPPENED                                                                         | FOOD                          | Reactivity |
|------|----------------|--------------------|---------------------------------------------------------------------------------------|-------------------------------|------------|
| 7:40 | MM             | BB                 | Mother fetch pap in a bowl and keep it in front of the baby, she starts drinking      | Cold papa                     |            |
| 7:45 | BB             |                    | Baby drinking the pap                                                                 | Cold pap                      |            |
| 7:50 | BB2            |                    | The baby's brother come to the house                                                  |                               |            |
| 7:55 | BB             | BB2                | The baby and her brother are playing                                                  |                               |            |
| 8:00 | FF             |                    | Father enter into the house and enter the room                                        |                               |            |
| 8:05 | MM             |                    | Mother is sweeping her room and compound                                              |                               |            |
| 8:10 | BB             |                    | Baby is easing herself on the ground                                                  |                               |            |
| 8:15 | FF,MM          |                    | Father went out and the mother is washing clothes                                     |                               |            |
| 8:20 | MM             |                    | Mother washing the clothes                                                            |                               |            |
| 8:25 | MM             | BB,BB2             | Mother brings tuwon dawa with vegetable soup for the children and they started eating | Tuwon dawa and spinach leaves |            |

| TIME | ACTOR INITIALS | RECIPIENT INITIALS | WHAT HAPPENED                                                                                                            | FOOD                           | Reactivity |
|------|----------------|--------------------|--------------------------------------------------------------------------------------------------------------------------|--------------------------------|------------|
| 8:30 | BB,BB2         |                    | The children are eating the food                                                                                         | Tuwon dawa with spinach leaves |            |
| 8:35 | BB2            | BB                 | The older brother is drinking water and he gives to the boy                                                              |                                |            |
| 8:40 | BB,BB2         |                    | The boy and her brother are playing with the sand                                                                        |                                |            |
| 8:45 | MM             |                    | Mother enters the toilet                                                                                                 |                                |            |
| 8:50 | BB,BB2         |                    | The baby and her brother are still playing with some other children that came into the house                             |                                |            |
| 8:55 | MM             |                    | Mother is washing her legs and face                                                                                      |                                |            |
| 9:00 | MM             |                    | Mother is going to grandmother house with the children                                                                   |                                |            |
| 9:05 | MM             |                    | Still going to the grandmother house                                                                                     |                                |            |
| 9:10 | GM             |                    | Grandmother is washing plates, the mother greeted her and sat down                                                       |                                |            |
| 9:15 | MM             |                    | Mother left the house leaving the children in grandmother house                                                          |                                |            |
| 9:20 | BB2            | BB                 | The brother is drinking water and give to the sister                                                                     |                                |            |
| 9:25 | BB             | BB2                | Baby playing with her brother with sand outside the house                                                                |                                |            |
| 9:30 | BB,BB2         |                    | They are still playing                                                                                                   |                                |            |
| 9:35 | BB             |                    | Baby playing with the other children in the community                                                                    |                                |            |
| 9:40 | FF             |                    | Father comes to the grandmother house, we are sitting under the tree                                                     |                                |            |
| 9:45 | FF             | BB                 | Baby is sitting on her father's lap                                                                                      |                                |            |
| 9:50 | BB,BB2         |                    | Baby playing with her brother                                                                                            |                                |            |
| 9:55 | BB,BB2         |                    | Baby and her brother with some other neighbou children of the same age are playing outside the house under the tree with |                                |            |

| TIME  | ACTOR INITIALS | RECIPIENT INITIALS | WHAT HAPPENED                                                                                                                                                                                                                                                              | FOOD            | Reactivity |
|-------|----------------|--------------------|----------------------------------------------------------------------------------------------------------------------------------------------------------------------------------------------------------------------------------------------------------------------------|-----------------|------------|
|       |                |                    | grandmother sitting                                                                                                                                                                                                                                                        |                 |            |
| 10:00 | BB,BB2         |                    | They are still playing                                                                                                                                                                                                                                                     |                 |            |
| 10:05 | GM             | TB                 | Grandmother sent the mother brother to call the mother (they are talking in language) I asked the grandmother she said she sent for her because she is going to the farm                                                                                                   |                 |            |
| 10:10 | GM             |                    | Grandmother left for farm leaving the children with the neighbor under the tree                                                                                                                                                                                            |                 |            |
| 10:15 | BB,BB2         |                    | The children are playing                                                                                                                                                                                                                                                   |                 |            |
| 10:20 | BB,BB2         |                    | The children are still playing                                                                                                                                                                                                                                             |                 |            |
| 10:25 | BB             |                    | Baby playing with the neighbor daughter                                                                                                                                                                                                                                    |                 |            |
| 10:30 | MM             |                    | Mother just surfaces with bunch of leaves on her head, I greeted and introduce myself and she said no problem. I asked her what is this, she said tamarind leaves they use it for cooking tuwo, they called it tuwon tsamiya (tamarind) and the baby is sitting on her lap | Tamarind leaves |            |
| 10:35 |                |                    |                                                                                                                                                                                                                                                                            |                 |            |
| 10:40 | MM             | BB,BB2             | Mother is removing catarrh from the son and the baby is playing on her lap                                                                                                                                                                                                 |                 |            |
| 10:45 | MM.BB<br>BB2   |                    | Mother sais we should go the house, she took the bunch of leaves placed on her head, took the baby and hold the son hand                                                                                                                                                   |                 |            |
| 10:50 | MM,BB<br>BB2   |                    | On the way to the house                                                                                                                                                                                                                                                    |                 |            |
| 10:55 | MM,BB<br>BB2   |                    | The mother and her children are sitting on the mat                                                                                                                                                                                                                         |                 |            |
| 11:00 | BB,BB2         |                    | The baby and her brother are playing                                                                                                                                                                                                                                       |                 |            |
| 11:05 | BB             |                    | The baby is playing with MNP sachet                                                                                                                                                                                                                                        |                 |            |

| TIME  | ACTOR INITIALS | RECIPIENT INITIALS | WHAT HAPPENED                                                                                                                                                                                                            | FOOD                                           | Reactivity |
|-------|----------------|--------------------|--------------------------------------------------------------------------------------------------------------------------------------------------------------------------------------------------------------------------|------------------------------------------------|------------|
| 11:10 | BB,TB          |                    | The bay is still playing with the used sachet putting it in her mouth and using it as her phone saying hello<br>The mother's brother comes into the house                                                                |                                                |            |
| 11:15 | BB             |                    | The baby is touching my hijab (veil) and my bag                                                                                                                                                                          | She is touching me because I am in their house |            |
| 11:20 | BB,BB2         |                    | The baby is playing with her mother                                                                                                                                                                                      |                                                |            |
| 11:25 | TB             | BB,                | The mother's brother goes to the room fetch tuwon dawa and spinach soup prepared with tamarind leaves, water. Pepper,s alt and magi. I asked the mother and she told me how the prepared it. The baby is feeding herself | Tuwon dawa with spinach and tamarind leaves    |            |
|       |                | BB                 | The son took the tuwon dawa in a bowl add water in it and sugar mixed it starts drinking it                                                                                                                              |                                                |            |
| 11:30 | MM             | BB                 | Mother is backing the baby                                                                                                                                                                                               |                                                |            |
| 11:35 | BB             |                    | Baby is playing with the remaining food in the bowl                                                                                                                                                                      |                                                |            |
|       | MM             | BB                 | Mother sent the son to buy razor blade                                                                                                                                                                                   |                                                |            |
| 11:40 | MM             | BB                 | Mother is cutting the baby's nails with the razor blade and equally removing the son's nails                                                                                                                             |                                                |            |
| 11:45 | MM             | BB,BB2             | Baby lying on her mother laps and the mother is cutting her son nails while chatting with her neighbor                                                                                                                   |                                                |            |
| 11:50 | BB,BB2         |                    | Mother cutting her nails, chatting with neighbor                                                                                                                                                                         |                                                |            |
| 11:55 |                |                    | and the baby is playing and her brother is sleeping on a mat                                                                                                                                                             |                                                |            |

| TIME  | ACTOR INITIALS | RECIPIENT INITIALS | WHAT HAPPENED                                                                                                     | FOOD | Reactivity |
|-------|----------------|--------------------|-------------------------------------------------------------------------------------------------------------------|------|------------|
| 12:05 | BB             |                    | Baby still playing                                                                                                |      |            |
| 12:10 | MM             | BB                 | Baby start making trouble and the mother back her                                                                 |      |            |
| 12:15 | MM             | BB                 | Baby on her mother back                                                                                           |      |            |
| 12:20 | MM             | BB                 | Baby is sleeping on her mother chest                                                                              |      |            |
| 12:25 | BB             |                    | Baby sleeping on the mat                                                                                          |      |            |
| 12:30 | MM             |                    | Mother is washing dishes                                                                                          |      |            |
| 12:35 | MM             |                    | Mother washing dishes                                                                                             |      |            |
| 12:40 | MM             |                    | Mother sweeping the surrounding                                                                                   |      |            |
| 12:45 | BB, BB2        |                    | The baby and her brother are sleeping                                                                             |      |            |
| 12:50 | MM             |                    | Mother is packing the dirt's into the dustbin                                                                     |      |            |
| 12:55 | MM             |                    | Mother went into the room                                                                                         |      |            |
| 1:00  | BB             |                    | Baby is still sleeping                                                                                            |      |            |
| 1:05  | MM             |                    | Mother is packing the clothes she washed earlier to the room                                                      |      |            |
| 1:10  | MM             |                    | Mother fetch water in a bucket and went to the toilet with container carrying sponge and soap                     |      |            |
| 1:15  | MM             |                    | The mother came out of the toilet. She is sitting drying her baby with her head tie and gisting with the neighbor |      |            |
|       | BB             |                    | The baby is still sleeping                                                                                        |      |            |
|       | MM             |                    | The mother goes into the room dressed up and came out                                                             |      |            |
| 1:20  | BB2            |                    | The son wakes up he pissed                                                                                        |      |            |
|       | BB2            | MM                 | Up his body, the mother remove his clothes and bath him, the boy is                                               |      |            |

| TIME | ACTOR INITIALS | RECIPIENT INITIALS | WHAT HAPPENED                                                                                                                                                                   | FOOD                                    | Reactivity |
|------|----------------|--------------------|---------------------------------------------------------------------------------------------------------------------------------------------------------------------------------|-----------------------------------------|------------|
|      |                |                    | crying                                                                                                                                                                          |                                         |            |
|      | MM             |                    | The mother puts the clothes in the remaining water add klin and wash them                                                                                                       |                                         |            |
| 1:25 | MM             | BB2                | The mother dressed up the son                                                                                                                                                   |                                         |            |
| 1:30 |                |                    | Baby is still sleeping. The baby wakes up and start crying                                                                                                                      |                                         |            |
|      | MM             | BB                 | Mother removes the baby clothes, the baby is easing herself. The mother fetch water to bath her and she ran away and starts crying, she took her and bath her                   |                                         |            |
| 1:35 |                |                    | She went into the room and dress her up                                                                                                                                         |                                         |            |
| 1:40 | MM             | BB,BB2             | The mother brought tuwon dawa with baobab leaves soup for the children and they eat, the baby is feeding herself                                                                | Tuwon dawa with baobab soup leaves      |            |
| 1:45 | BB2            |                    | They are still eating the food                                                                                                                                                  |                                         |            |
|      | MM             | BB,BB2             | Mother add soup for them, the baby starts crying, she does not want to allow her brother to eat, the mother said he should stop eating and allow her to finish                  | Tuwon dawa and dried baobab leaves soup |            |
| 1:50 | BB             |                    | The baby is still eating the food                                                                                                                                               |                                         |            |
| 1:55 | FF             |                    | Father comes back with a black leather and give to the mother, she opens it and saw gwade and chin-chin. The gwade is made up groundnut, she gives to the children and they eat | Gwade and chin-chin                     |            |
| 2:00 | MM             | BB                 | She adds to the baby                                                                                                                                                            |                                         |            |
| 2:05 | MM             | BB,BB2             | Mother washing the children hands with water in the bowl                                                                                                                        |                                         |            |
|      | MM             | BB                 | Mother adds chin-chin to the baby                                                                                                                                               |                                         |            |

| TIME | ACTOR INITIALS | RECIPIENT INITIALS | WHAT HAPPENED                                                                                                                                                   | FOOD                                     | Reactivity |
|------|----------------|--------------------|-----------------------------------------------------------------------------------------------------------------------------------------------------------------|------------------------------------------|------------|
| 2:10 |                |                    |                                                                                                                                                                 |                                          |            |
| 2:15 | MM             | BB                 | Mother gave the baby the remaining chi-chin                                                                                                                     |                                          |            |
| 2:20 | BB             | SB                 | The son is eating tuwon dawa, dried babab leaves soup with the neighbours child                                                                                 | Tuwon dawa with dried baobab leaves soup |            |
| 2:25 | BB             | SB                 | They are still eating the food                                                                                                                                  | Tuwon dawa with dried baobab leaves soup |            |
| 2:30 | MM             | BB,BB<br>SB        | Mother gives the baby, son and neighbours son gwade                                                                                                             | Gwade from groundnut                     |            |
|      | BB2            | BB                 | The son is drinking water and he gives to the baby.                                                                                                             |                                          |            |
| 2:35 | MM             | BB                 | Baby is making trouble to the mother, the mother back her and she starts smiling. The neighbor says when your mother have another baby you will not do all this |                                          |            |
| 2:40 | MM             | BB                 | Mother still backing the baby                                                                                                                                   |                                          |            |
| 2:45 | MM             |                    | Mother keep the baby on the ground                                                                                                                              |                                          |            |
| 2:50 | BB             |                    | The boy is playing                                                                                                                                              |                                          |            |
| 2:55 | BB             | BB2                | The baby is playing with her brother and she just piss up her legs because she is standing                                                                      |                                          |            |
|      | MM             | BB                 | The mother wash her baby                                                                                                                                        |                                          |            |
| 3:00 | BB             |                    | Baby playing on her mother body, the mother is lying down on the mat                                                                                            |                                          |            |
| 3:05 | BB             |                    | Baby is playing with the neighbor son                                                                                                                           |                                          |            |



| TIME | ACTOR INITIALS | RECIPIENT INITIALS | WHAT HAPPENED                                                                           | FOOD  | Reactivity |
|------|----------------|--------------------|-----------------------------------------------------------------------------------------|-------|------------|
| 3:10 | MM             | NB                 | Mother is making bread                                                                  |       |            |
| 3:15 | MM             | BB                 | Baby is crying and she said her mother most remove her clothes for her                  |       |            |
|      | BB             |                    | The baby went out to play with sand                                                     |       |            |
| 3:20 | BB             |                    | Baby is sitting on her mother's lap and the mother is making breads for her neighbour   |       |            |
| 3:25 | BB,BB2<br>SB   |                    | The baby is playing alone, the son and the neighbor are also playing together           |       |            |
| 3:30 | MM             | NB                 | Mother still making breads for her neighbor                                             |       |            |
| 3:35 | BB             |                    | Baby is still playing                                                                   |       |            |
| 3:40 | BB             |                    | Baby still playing                                                                      |       |            |
| 3:45 | BB,MM          |                    | Baby is playing and the mother is still making breads. The son is lying down on the mat |       |            |
| 3:50 |                |                    | The baby is playing, she ease herself and continue playing                              |       |            |
| 3:55 | BB             |                    | Baby still on her mother laps                                                           |       |            |
| 4:00 | BB             | BB2                | Baby playing with her brother                                                           |       |            |
| 4:05 | BB2            | BB                 | Brother is beating his sister and she is crying.                                        |       |            |
|      | MM             |                    | The baby run to the mother crying and the mother took her and sit with her on her lap   |       |            |
| 4:10 | BB2            |                    | The son is playing                                                                      |       |            |
| 4:15 | MM             | BB,BB2             | Mother gives the baby and her brother gwade to eat                                      | Gwade |            |
| 4:25 | BB2            |                    | The son is lying down on a mat                                                          |       |            |
| 4:30 | MM             | BB2                | Mother sent the son to bring water for the baby from the pot                            |       |            |

| TIME | ACTOR INITIALS | RECIPIENT INITIALS | WHAT HAPPENED                                                                                                                                                        | FOOD                        | Reactivity |
|------|----------------|--------------------|----------------------------------------------------------------------------------------------------------------------------------------------------------------------|-----------------------------|------------|
|      | BB             |                    | Baby is drinking the water                                                                                                                                           |                             |            |
| 4:35 | BB             |                    | The baby is playing with her mother sitting on her lap                                                                                                               |                             |            |
| 4:40 | FF             |                    | Father comes into the house and the mother brought water for him to bath                                                                                             |                             |            |
|      | MM             |                    | Mother fetch water in a bucket and take to the toilet, took the container, soap and sponge and say to him the water is ready, then the father stood up to the toilet |                             |            |
| 4:45 | MM             | BB,BB2             | Mother brought the remaining pap in a bucket and share it to the bay and her brother                                                                                 | Cold millet pap             |            |
| 4:50 | BB             |                    | Baby is playing on the flour and the mother starts making breads, the baby starts crying and the mother leave her hair                                               |                             |            |
| 4:55 | BB             |                    | Baby is playing                                                                                                                                                      |                             |            |
| 5:00 | MM             |                    | Mother is setting fire                                                                                                                                               |                             |            |
| 5:05 | MM             |                    | Mother put the pot on the fire filled with water                                                                                                                     |                             |            |
| 5:10 | BB,BB2         |                    | Baby playing with her brother, the brother is refusing                                                                                                               |                             |            |
| 5:15 | BB,BB2<br>mm   |                    | The mother and the children are lying down on a mat, the bay is playing besides her mother                                                                           |                             |            |
| 5:20 | BB2            |                    | The son starts crying and the mother said he should go to the room and take tuwo and mixed with water.                                                               |                             |            |
|      | BB2            |                    | The son took the bowl take some tuwo dawa from the room come out and mix and he starts drinking it                                                                   | Tuwon dawa mixed with water |            |
|      | BB2            |                    | The boy is reducing the water he starts drinking, the baby is                                                                                                        |                             |            |

| TIME | ACTOR INITIALS | RECIPIENT INITIALS | WHAT HAPPENED                                                                                                                      | FOOD                        | Reactivity |
|------|----------------|--------------------|------------------------------------------------------------------------------------------------------------------------------------|-----------------------------|------------|
|      |                |                    | following him crying                                                                                                               |                             |            |
| 5:25 | MM             | BB                 | Mother fetch water in a cup give the baby and took tuwo dawa and put into the remaining water and mixed, starts giving to the baby | Tuwon dawa mixed with water |            |
| 5:30 | MM             |                    | Mother rinsing the tamarind leaves and putting it into the pot                                                                     |                             |            |
|      | BB2            |                    | The son add another tuwo dawa in his bowl and add water and he starts mixing it                                                    | Tuwon dawa mixed with water |            |
| 5:35 | MM             | BB                 | Mother is washing the s body                                                                                                       |                             |            |
|      | BB             |                    | Baby is playing with water                                                                                                         |                             |            |
| 5:40 | MM             | BB                 | Baby is stooling, the mother packed the stool and washed her body                                                                  |                             |            |
|      | BB             |                    | Baby is playing                                                                                                                    |                             |            |
|      | BB             |                    | Baby is drinking water                                                                                                             |                             |            |
| 5:45 | MM             |                    | Mother is sieving flour sorghum                                                                                                    |                             |            |
| 5:50 | MM             |                    | Mother is sieving the flour                                                                                                        |                             |            |
|      | BB             |                    | Baby is still playing                                                                                                              |                             |            |
| 5:55 | MM             |                    | Mother is draining the boiling water in the pot from the leaves                                                                    | tamarind leaves             |            |
|      | MM             |                    | Mother fetching the water and backing the pot                                                                                      |                             |            |
| 6:00 | MM             |                    | Mother setting another fire, she put a small pot on the fire and add water then close the pot                                      |                             |            |
|      | MM             | BB                 | Mother is playing with the baby                                                                                                    |                             |            |
|      | BB             |                    | The son is outside playing with neighbor children                                                                                  |                             |            |
| 6:05 | MM             |                    | Mother took a small calabash, put                                                                                                  |                             |            |

| TIME | ACTOR INITIALS | RECIPIENT INITIALS | WHAT HAPPENED                                                                                                                                                                                                   | FOOD  | Reactivity |
|------|----------------|--------------------|-----------------------------------------------------------------------------------------------------------------------------------------------------------------------------------------------------------------|-------|------------|
|      |                |                    | small amount of sorghum flour, add the boiling water, mix like a ball and put in the boiling water continuously                                                                                                 |       |            |
|      | MM             |                    | Mother washing dishes and cups                                                                                                                                                                                  |       |            |
|      | MM             |                    | Mother took a big silver bowl add the sorghum flour add small amount of cold water and stir, then took the whole boiling tamarind water with some flour ball all into the bowl, its turns to pap (tamarind pap) |       |            |
| 6:15 | MM             |                    | Mother washing beans in a bowl and adding it on a small pot she put on a fire near her, she add salt and magi                                                                                                   | beans |            |
|      | MM             |                    | Mother took black ashes from a bag and add water into it with another bowl under it. The water is dropping down, she add the water into the beans                                                               |       |            |
| 6:20 | MM             |                    | Mother cutting okra                                                                                                                                                                                             | Okra  |            |
|      | BB,BB2         |                    | The baby is playing with her brither on the ground                                                                                                                                                              |       |            |

Primary Questions (Complete after you complete data collection):

From what you have seen observing THIS HOUSEHOLD, please answer the following questions in detail:

| Question                                                                                                                                                      | Write your <u>detailed</u> response here                                                                                                                                                                                                                                                                                                                                                                          |
|---------------------------------------------------------------------------------------------------------------------------------------------------------------|-------------------------------------------------------------------------------------------------------------------------------------------------------------------------------------------------------------------------------------------------------------------------------------------------------------------------------------------------------------------------------------------------------------------|
| <p>1. In this household, what would be the best way(s) to give nutritional supplements such as an MNP to young children to ensure compliance?</p> <p>Why?</p> | <p>Is through the mother because she takes care of the children, she is in charge of feeding the baby and other things in the house. Secondly, the grandmother , I was told by the neighbor of the grandmother that whenever the mother is going out she drops them there that is with the grandmother and sometimes even if the mother is at home the son (small boy) will come with his sister to the house</p> |

|                                                                                                                                                                           |                                                                                                                                                                                                                                                                                                                                                                                                              |
|---------------------------------------------------------------------------------------------------------------------------------------------------------------------------|--------------------------------------------------------------------------------------------------------------------------------------------------------------------------------------------------------------------------------------------------------------------------------------------------------------------------------------------------------------------------------------------------------------|
|                                                                                                                                                                           |                                                                                                                                                                                                                                                                                                                                                                                                              |
| <p>2. In this household, who is favored during meal preparation or feeding?</p> <p>How is this favoritism expressed?</p>                                                  | <p>The bay is favoured during the meal feeding because the mother gives her food first before anyone in the house. When a special food is brought in the house she will have the major shared. If she is crying about and does not want to eat with his brother, the mother will say to the brother to leave it for her. The baby is always protected by her mother.</p>                                     |
| <p>3. How could we promote the MNP supplement for this family that would attract their attention?</p> <p>Who would they listen to?</p>                                    | <p>Through the father because the women in this community really serve their husbands as I saw, not only in this household they respect and obey their husband's instruction. Therefore, I think the best way to promote MNP for this family is through the husband</p>                                                                                                                                      |
| <p>4. In this household, what would be the best ways to promote the MNP but limit how much it would be shared?</p> <p>Why?</p>                                            | <p>Through proper sensitization of the product to the mothers because she is the person feeding the baby and other children in the house. So she can make sure that baby eats/takes th MNP alone without sharing it with others.</p> <ul style="list-style-type: none"> <li>-enough information about the MNP</li> <li>-how to administer the MNP</li> <li>-rules and regulations of MNP</li> </ul>          |
| <p>5. What other issues and concerns did you see with this family that are important for us to consider with regard to introduction of an MNP?</p> <p>Why?</p>            | <p>Is sharing the MNP with neighbor children that do not have the MNP because they came to the mother to give them some food to give their children and some say that we should please give this MNP to their children although they are not among the selected ages so that they will be healthy</p> <p>Inadequate food is also a concern in this family, sorghum is the major food eaten in this house</p> |
| <p>6. Based on your experience observing this child today, do you believe reactivity negatively impacted your ability to see the food-related behaviors of the child?</p> | <p>Based on my experienced I don't think reactivity negatively impacted on my ability to see the food related behaviours of the child because the neighbor says the moment the mother have another baby, she will not have all this care, so I learnt that when you have a baby in the house before the mother have another baby, you will have everything (caring and feeding) is special. The</p>          |

|                                              |                                                                                                                                |
|----------------------------------------------|--------------------------------------------------------------------------------------------------------------------------------|
| <p>Please explain your answer in detail.</p> | <p>moment she has another baby, the baby takes over. Therefore, she is being favoured because she is the baby of the house</p> |
|----------------------------------------------|--------------------------------------------------------------------------------------------------------------------------------|
