# Supplementary material for: Acceptance and compliance with micronutrient powder (MNP) among children aged 6–23 months in northern Nigeria
Source: PLOS journal article supplement (doi:10.1371/journal.pgph.0000961), 2022-10-17
Supplement: S8 (10.1371/journal.pgph.0000961.s008) [file journal.pgph.0000961.s008]

### 1.1.1 Instrument F –Direct Observation Form

#### <<Instrument F Direct Observation Form>>

**PI Name:** PragmaMathema, Stephen Kodish

**Study Title:** Formative research to develop an infant and young child feeding (IYCF) intervention with micronutrient powder (MNP) for children aged 6 – 23 months

**PI Version/Date:** Version1.0/January 24, 2015

Date: 22/06/15 Location: Tanza Babba/ Jega

Data Collector: Samira Adamu

Main goals of this direct observation are to answer the following questions:

1. In this household, what would be the best way(s) to give nutritional supplements to young children? Why?
2. In this household, describe the food sharing that you observe throughout the meal. Are there any predictable patterns?
3. In this household, who is favored and how is this favoritism expressed during meal preparation and eating?

Household Composition Table (Fill out as you do data collection)

| INITIALS | SEX (M/F) | AGE (estimated) | Relationship to household            | Description (not necessary)                                       |
|----------|-----------|-----------------|--------------------------------------|-------------------------------------------------------------------|
| BGS      | M         | 7months         | Youngest child                       | Baby boy wearing a green sweater                                  |
| MB       | F         | 20years         | Mother of the child(daughter-in-law) | Medium height wearing a pink and a black vest                     |
| DL1      | F         | 25years         | Wife of the first son                | Medium height wearing a striped shirt with green veil             |
| DL2      | F         | 22years         | Wife of first son                    | Short, wearing a maroon bra with brown dotted scarf               |
| ML       | F         | 55years         | Mother-in-law, grandmother(child)    | Dark and tall with green wrapper and black veil                   |
| MML1     | F         | 45years         | Mother-in-law (wife of the uncle)    | Slim with green and red wrapper with peach veil                   |
| MDL1     | F         | 20years         | Uncle's daughter-in-law              | Fair complexioned with blue and yellow wrapper and pink scarf     |
| MDL2     | F         | 16years         | Uncle's daughter in-law              | Dark complexioned with yellow and orange wrapper and orange scarf |
| BGM      | F         | 10months        | cousin                               | Wearing light green shirt and two round                           |

|     |   |         |                       |                                                      |
|-----|---|---------|-----------------------|------------------------------------------------------|
|     |   |         |                       | ear-rings                                            |
| BB4 | F | 4years  | 5 <sup>th</sup> child | Wearing a striped shirt and a bit fair and plump     |
| BB3 | F |         | 4 <sup>th</sup> child | Dark wearing white and peach shirt with black skirts |
| BB2 | F |         | 3 <sup>rd</sup> child | Wearing an orange vest with brown skirt              |
| BB1 | F | 10years | 1 <sup>st</sup> child | Wearing red and stripped shirt with tribal mark      |
| FL  | M | 70years | Father-in-law         | Slim and fair skinned complexioned old man           |

PARTICIPANT ID: \_\_\_\_\_

| TIME | ACTOR INITIALS | RECIPIENT INITIALS | WHAT HAPPENED                                        | FOOD        | Reactivity |
|------|----------------|--------------------|------------------------------------------------------|-------------|------------|
| 8:40 | MB             | BGS                | Backing the baby while standing                      |             |            |
| 8:45 | MB             | BGS                | Backing the baby while standing                      |             |            |
|      | MB             |                    | Pounding grains for processing to remove shaft       | maize       |            |
|      | MB&DL          |                    | Pounding grains processing to remove shaft           | maize       |            |
| 8:50 | MB             | BGS                | Backing the baby while standing                      |             |            |
|      | MB             |                    | Still pounding grains for processing to remove shaft | maize       |            |
|      | DL             |                    | Processing grains to remove shaft                    | maize       |            |
| 8:55 | MB             | BGS                | Feeding the child breast milk while standing         | Breast milk |            |
| 9:00 | MB             | BGS                | Feeding the child breast milk while standing         | Breast milk |            |
| 9:05 | MB             | BGS                | Feeding the child breast milk while standing         | Breast milk |            |
|      | MB             |                    | Still feeding the baby and pounding maize            | Breast milk |            |
| 9:10 | MB             | BGS                | Still feeding the baby and pounding maize            | Breast milk |            |

| TIME | ACTOR INITIALS | RECIPIENT INITIALS | WHAT HAPPENED                                                             | FOOD  | Reactivity |
|------|----------------|--------------------|---------------------------------------------------------------------------|-------|------------|
|      | MDL1           |                    | Pounding maize to process by removing shaft                               | Maize |            |
|      | MDL2           |                    | Pounding maize to process to remove shaft                                 | Maize |            |
|      | DL1            |                    | Pounding maize to process to process shaft.                               | Maize |            |
| 9:15 | BGS            |                    | The child is sleeping on the mothers back                                 |       |            |
|      | MB             | BGS                | Backing the baby and pounding maize                                       | Maize |            |
|      | DL1<br>DL2     | BGM                | Both are pounding maize to process by removing shaft.                     | Maize |            |
|      | MDL1           |                    | Backing the baby and pounding the maize                                   | Maize |            |
|      | MDL2           |                    | Processing maize to remove shaft                                          |       |            |
| 9:20 | DL2            |                    | Sieving grounded flour to remove the coarse grains and obtain fine flour. | Maiwa |            |
|      | BGS            |                    | The child is sleeping on the mat                                          |       |            |
|      | ML             |                    | Washing her wrapper                                                       |       |            |
| 9:25 | BGS            |                    | The child is sleeping on the mat                                          |       |            |
|      | DL2            |                    | Sieving grounded flour to remove the coarse grain and obtain fine flour.  | Maiwa |            |
|      | MDL1&<br>MDL2  |                    | Both pounding maize to flour.                                             |       |            |
| 9:30 | BGS            |                    | The child is sleeping on the mat                                          |       |            |
| 9:35 | BGS            |                    | The child is sleeping                                                     |       |            |
|      | MB             |                    | She is washing a pot                                                      |       |            |
| 9:40 | BGS            |                    | The child is still sleeping on the mat.                                   |       |            |
|      | MB             |                    | Washing the processed maize to sieve out shaft                            | Maize |            |

| TIME  | ACTOR INITIALS | RECIPIENT INITIALS | WHAT HAPPENED                                                               | FOOD      | Reactivity |
|-------|----------------|--------------------|-----------------------------------------------------------------------------|-----------|------------|
|       |                |                    | with calabash.                                                              |           |            |
|       | MDL1&<br>MDL2  |                    | Still pounding the maize, a process to remove the shaft                     | Maize     |            |
| 9:45  | BGS            |                    | The child is still sleeping on the mat.                                     |           |            |
|       | MB             |                    | Draining the maize in a sieve.                                              | Maize     |            |
|       | MB             | BGS                | Backing the baby                                                            |           |            |
| 9:50  | MB             | BGS                | Backing the baby                                                            |           |            |
|       | MB             |                    | Selling tamarind to a girl from the neighborhood                            | Tarmarind |            |
| 9:55  | DL2            |                    | Sieving fine grounded flour                                                 | Maize     |            |
|       | BGS            |                    | The child is still sleeping on the mat                                      |           |            |
|       | MB             | BGS                | Backing the baby                                                            |           |            |
| 10:00 | DL2            |                    | Sieving grounded maize to obtain fine flour.                                | maiwa     |            |
|       | MB             | BGS                | Backing the baby                                                            |           |            |
|       | BGS            |                    | The child is sleeping on the mat.                                           |           |            |
| 10:05 | BGS            |                    | The child wakes up and started crying; the mother came and backs the child. |           |            |
|       | MB             | BGS                | The mother is still backing the child                                       |           |            |
|       | DL2            |                    | Still grinding the cereal into flour                                        | Maiwa     |            |
| 10:10 | MB             |                    | Backing the baby                                                            |           |            |
|       | MB             |                    | Sieving grounded flour to obtain fine flour.                                | Maiwa     |            |
|       | BB3            | BB1                | Giving the other child rice in a transparent polythene bag to eat.          | Rice      |            |
|       | BB3            | BB2&BB1            | Sharing rice with the other                                                 | rice      |            |

| TIME  | ACTOR INITIALS | RECIPIENT INITIALS | WHAT HAPPENED                                                                    | FOOD             | Reactivity |
|-------|----------------|--------------------|----------------------------------------------------------------------------------|------------------|------------|
|       |                |                    | children from the transparent polythene bag.                                     |                  |            |
| 10:15 | MB             | BGS                | Backing the baby                                                                 |                  |            |
|       | DL2            |                    | Pounding the coarse grains obtained after sieving maiwa flour                    | Maiwa            |            |
| 10:20 | MB             |                    | Still backing the baby                                                           |                  |            |
|       | DL2            |                    | Pounding the remaining maiwa cereal                                              | Maiwa            |            |
| 10:25 | MB             | BGS                | Breastfeeding the baby                                                           | Breast milk      |            |
| 10:30 | MB             | BGS                | Breastfeeding the baby                                                           | Breast milk      |            |
| 10:35 | MB             | BGS                | Making the child urinate by placing him in between her two legs                  |                  |            |
|       | ML             |                    | Playing with the child                                                           |                  |            |
| 10:40 |                |                    | Breastfeeding the child                                                          | Breast milk      |            |
| 10:45 | BGS            |                    | The child is crying, the mother carried the child and started feeding the child. | Breast milk      |            |
| 10:50 | MB             | BGS                | Breastfeeding the baby                                                           | Breast milk      |            |
|       | BGS            |                    | Playing with the other children                                                  |                  |            |
| 10:55 | MB             |                    | Processing moringa by removing the leaves from the stick                         | Moringa(dakaule) |            |
|       | DL2            |                    | Also processing the moringa                                                      |                  |            |
|       | BGS            |                    | Playing on the floor with moringa sticks                                         |                  |            |
| 11:00 | MB             |                    | Processing moringa by removing the leaves from the stick                         | Moringa          |            |
|       | DL2            |                    | Also processing the                                                              |                  |            |

| TIME  | ACTOR INITIALS | RECIPIENT INITIALS | WHAT HAPPENED                                                    | FOOD        | Reactivity |
|-------|----------------|--------------------|------------------------------------------------------------------|-------------|------------|
|       |                |                    | moringa by removing leaves from the stick.                       |             |            |
|       | BGS            |                    | Playing with the moringa sticks and putting it in his mouth      |             |            |
| 11:05 | BGS            |                    | Playing with other children                                      |             |            |
|       | MB             |                    | Still processing moringa by removing leaves from the stick.      | Moringa     |            |
|       | DL2            |                    | Still processing moringa by removing leaves from the stick.      | Moringa     |            |
| 11:10 | MB             | BGS                | Breastfeeding the child                                          | Breast milk |            |
|       | DL2&MB         |                    | Both are still processing moringa                                | Moringa     |            |
| 11:15 | BGS            |                    | Playing with his siblings                                        |             |            |
|       | MB&DL2         |                    | Still processing moringa                                         | Moringa     |            |
| 11:20 | BB1            | BGS                | Carrying the child on her laps                                   |             |            |
| 11:25 | BGS            |                    | Crawling around the house                                        |             |            |
| 11:30 | BGS            |                    | Still playing with the moringa sticks                            | Moringa     |            |
|       | MB&DL2         |                    | Processing of moringa by removing the leaves from the sticks.    |             |            |
| 11:35 | MB             | BGS                | Breastfeeding the child                                          | Breast milk |            |
| 11:40 | MB             | BGS                | Breastfeeding the child                                          | Breast milk |            |
|       | MDL2&MB        |                    | Still Processing the moringa leaves to remove leaves from sticks |             |            |
| 11:45 | BGS            |                    | Crawling around the house and eating raw dankauale (moringa)     | Moringa     |            |
|       | MML            | BGS                | Carrying the child to her                                        |             |            |

| TIME  | ACTOR INITIALS | RECIPIENT INITIALS | WHAT HAPPENED                                               | FOOD        | Reactivity |
|-------|----------------|--------------------|-------------------------------------------------------------|-------------|------------|
| 11:50 |                |                    | side of apartment in the house                              |             |            |
| 11:55 | MML            | BGS                | Playing with the child by her side                          |             |            |
| 12:00 | BGS            |                    | Playing with stainless bowl                                 |             |            |
|       | MB             |                    | Sitting and watching the baby play with the stainless bowl. |             |            |
| 12:05 | BGS            |                    | Still playing with bowl alone,                              |             |            |
| 12:10 | BGS            |                    | Still playing with bowl alone                               |             |            |
| 12:15 | BGS<br>MB      |                    | Still playing with bowl alone as the mother watches him.    |             |            |
| 12:20 | BGS            |                    | The child is playing with his hands                         |             |            |
| 12:25 | MB             | BGS                | She is breastfeeding the child while sitting on a stool.    | Breast milk |            |
| 12:30 | BGS            |                    | Stooling on the floor                                       |             |            |
|       | MB             |                    | Holding the child as he stools on the floor                 |             |            |
|       |                |                    |                                                             |             |            |
| 12:45 | MB             | BGS                | Bathing the baby inside the bathroom.                       |             |            |
| 12:50 | MB             | BGS                | Bathing the baby inside the bathroom                        |             |            |
| 12:55 | MB             | BGS                | Wearing pant for the child                                  |             |            |
| 1:00  | MB             | BGS                | Sitting on the mat and breastfeeding the baby               | Breast milk |            |
| 1:05  | MB             | BGS                | Lying on the mat with the baby and breastfeeding the baby   | Breast milk |            |
| 1:10  | MB             | BGS                | Lying on the mat with the and breastfeeding the baby.       | Breast milk |            |

| TIME | ACTOR INITIALS | RECIPIENT INITIALS | WHAT HAPPENED             | FOOD | Reactivity |
|------|----------------|--------------------|---------------------------|------|------------|
|      | BGS            |                    | Sleeping on the mat alone |      |            |

|      |      |         |                                                                                          |             |  |
|------|------|---------|------------------------------------------------------------------------------------------|-------------|--|
| 1:15 | BGS  |         | Sleeping on the mat                                                                      |             |  |
| 1:20 | BGS  |         | Sleeping on the mat alone.                                                               |             |  |
| 1:25 | BGS  |         | Sleeping on the mat alone.                                                               |             |  |
|      | MB   |         | Processing bitter leaf vegetable i.e removing the leaves from the stick of the vegetable | Bitter leaf |  |
| 1:30 | BGS  |         | Sleeping on the mat                                                                      |             |  |
|      | MB   |         | Still processing the vegetable removing the leaves from the stick of the vegetable       | Bitter leaf |  |
|      | BB1  |         | Crying and shouting at the mother                                                        |             |  |
|      | MDL1 |         | Washing plates, bowls, cups and pots.                                                    |             |  |
| 1:35 | MB   |         | Still processing bitter leaves                                                           | Bitter leaf |  |
|      | BGS  |         | Sleeping on the mat                                                                      |             |  |
|      | BB1  | BB2&BB3 | Sharing 'gumba' (firm hard paste) among the other siblings                               | Maiwa       |  |
| 1:40 | MB   |         | Still processing the bitter leaves                                                       | Bitter leaf |  |
|      | BGS  |         | Sleeping on the mat alone                                                                |             |  |
| 1:45 | BGS  |         | Sleeping on the mat alone                                                                |             |  |
| 1:50 | BGS  |         | Sleeping on the mat alone                                                                |             |  |
|      | MB   |         | Sitting beside the child on the mat while the child was sleeping                         |             |  |
|      | BB4  |         | Feeding herself kunu                                                                     | Kunun maiwa |  |
| 1:55 | MB   | BGS     | Sitting on a stool and giving the baby water, carrying him on her laps                   | Water       |  |



|      |     |     |                                                                                             |                              |  |
|------|-----|-----|---------------------------------------------------------------------------------------------|------------------------------|--|
| 2:00 | MB  | BGS | Breastfeeding the baby                                                                      | Breast milk                  |  |
|      | BB4 | BB4 | Crying and drinking kunu                                                                    | Kunun maiwa                  |  |
| 2:05 | MB  | BGS | Breastfeeding the baby                                                                      | Breast milk                  |  |
| 2:10 | MB  | BGS | Breastfeeding the baby                                                                      | Breast milk                  |  |
|      | BB1 | BGS | Playing with the child                                                                      |                              |  |
|      | BB2 | BGS | Playing with the child                                                                      |                              |  |
| 2:15 | MB  | BGS | Walking and breastfeeding the child                                                         | Breast milk                  |  |
|      | BB4 |     | Still crying and shouting at the mother                                                     |                              |  |
|      | DL1 |     | Washing black pots                                                                          |                              |  |
| 2:20 | MB  | BGS | Backing the baby                                                                            |                              |  |
| 2:25 | MB  | BGS | Backing the baby                                                                            |                              |  |
|      | BB4 | BB4 | Eating tuwo and vegetable soup                                                              | Tuwon maize and spinach soup |  |
|      | BB3 | BB3 | Eating tuwo and vegetable soup                                                              | Tuwon Maize and Spinach soup |  |
| 2:30 | MB  | BGS | Backing the baby                                                                            |                              |  |
|      |     | BGS | Playing on his mother back and stretching his hands as he wants to meet the siblings eating |                              |  |
|      | BB4 |     | Eating tuwo and spinach soup                                                                | Tuwo and spinach soup        |  |
|      | BB3 |     | Eating tuwo and spinach soup                                                                | Tuwo and                     |  |

|      |         |      |                                                           |              |  |
|------|---------|------|-----------------------------------------------------------|--------------|--|
|      |         |      |                                                           | spinach soup |  |
|      | MB      |      | Selling tamarind to a young girl within the neighborhood. |              |  |
| 2:35 | MB      | BGS  | Backing the child                                         |              |  |
| 2:40 | MB      | BGS  | Backing the child                                         |              |  |
|      | MB      |      | Carrying a bucket of water on her head                    |              |  |
|      | BB3&BB4 |      | Playing with sticks and stones                            |              |  |
| 2:45 | MB      | BGS  | Backing the baby with a bucket of water on her head.      |              |  |
| 2:50 | MB      | BGS  | Backing the baby and standing                             |              |  |
|      | BGS     |      | Playing with his tongue                                   |              |  |
|      | DL2     |      | Washing plates and bowls                                  |              |  |
| 2:55 | MB      | BGS  | Breastfeeding the child while standing                    | Breast milk  |  |
| 3:00 | MB      | MDL2 | Selling maiwa grains to her                               |              |  |
| 3:05 | BGS     |      | Lying on the bed alone while the mother is away.          |              |  |
| 3:10 | BGS     |      | Lying on the bed and crying and the mother is still away. |              |  |
| 3:15 | MB      | BGS  | Backing the baby while standing                           |              |  |
|      | MDL2    |      | Processing maiwa grains to remove shafts                  | Maiwa grains |  |
|      | DL2     |      | Washing plates and pots                                   |              |  |
| 3:20 | MB      | BGS  | Backing the baby and still standing.                      |              |  |
|      | MB      |      | Setting the fire with firewood.                           |              |  |
|      | DL2     |      | Washing of utensils, pots and bowls                       |              |  |
| 3:23 | DL2     |      | Putting pot on the fire                                   |              |  |
|      | DL2     |      | Adding water to the pot                                   |              |  |

|      |         |     |                                                               |         |  |
|------|---------|-----|---------------------------------------------------------------|---------|--|
| 3:24 |         |     |                                                               |         |  |
| 3:25 | MB      | BGB | Backing the baby while standing                               |         |  |
|      | DL2     |     | Adding firewood to the fire                                   |         |  |
| 3:28 | DL2     |     | Adding washed dankauke to the pot of water                    | moringa |  |
| 3:33 | MB      | BGB | Backing the baby                                              |         |  |
| 3:38 | MB      | BGB | Backing the baby                                              |         |  |
|      | MB      |     | Sweeping her corridor and bringing out dirty plates and bowls |         |  |
| 3:43 | MB      |     | Sweeping her compound and backing the baby.                   |         |  |
|      | BGB     |     | Lying on a cane bed                                           |         |  |
|      | BB4     | BGB | Playing with the child                                        |         |  |
|      | DL2     |     | Washing another pot                                           |         |  |
| 3:48 | MB      |     | Selling tamarind to a girl and later continues sweeping       |         |  |
| 3:53 | BGS     |     | Lying on a cane bed                                           |         |  |
|      | BB4     | BGS | Playing with the child                                        |         |  |
| 3:58 | MB      |     | Washing plates and bowls                                      |         |  |
|      | BGS     |     | Lying in a cane bed                                           |         |  |
|      | BB4&BB3 | BGS | Playing with the child                                        |         |  |
|      | DL2     |     | Checking th dankauke in the pot on fire.                      | moringa |  |
| 4:00 | DL2     |     | Setting another fire                                          |         |  |
| 4:02 | DL2     |     | Putting a pot of water on the fire and adding more firewood   |         |  |
| 4:04 | DL2     |     | Adding more water to the pot                                  |         |  |
|      | MB      |     | Washing plates and pots                                       |         |  |

|      |     |         |                                              |             |                                                                           |
|------|-----|---------|----------------------------------------------|-------------|---------------------------------------------------------------------------|
|      | BGS |         | Still playing with siblings                  |             |                                                                           |
| 4:14 | BGS |         | Still playing with siblings                  |             |                                                                           |
|      | DL2 |         | Setting the fire                             |             |                                                                           |
| 4:19 | MB  | BGS     | Bathing the child                            |             |                                                                           |
| 4:24 | MB  | BB3&BB4 | Bathing the other children                   |             |                                                                           |
| 4:29 | MB  | Bb3&bb4 | Wearing new clothes for the children         |             | She had to wear very new clothes for the children because of my presence. |
|      | DL2 |         | Adding firewood                              |             |                                                                           |
| 4:34 | MB  | BGB     | Carrying the child                           |             |                                                                           |
| 4:39 | BGB |         | Playing alone                                |             |                                                                           |
| 4:44 | DL2 |         | Checking the water which was already boiling |             |                                                                           |
| 4:49 | BB1 | BGS     | Giving the child cooked dankauke             | Moringa     |                                                                           |
| 4:54 | BGS |         | Eating cooked dankauke                       | moringa     |                                                                           |
| 4:59 |     |         | The water in the pot is boiling              |             |                                                                           |
|      | MB  | BGS     | Breast feeding the child                     | Breast milk |                                                                           |
| 5:04 | MB  | BGS     | Breast feeding the child                     | Breast milk |                                                                           |
| 5:09 | MB  | BGS     | Breast feeding the child                     | Breast milk |                                                                           |
| 5:14 | MB  |         | Sieving water into the pot                   |             |                                                                           |
|      | BGS |         | Playing with stick                           |             |                                                                           |

|      |     |     |                                                                                              |             |  |
|------|-----|-----|----------------------------------------------------------------------------------------------|-------------|--|
|      |     |     |                                                                                              |             |  |
| 5:19 | BGS |     | Licking kuli-kuli                                                                            | Kuli-kuli   |  |
| 5:24 | BGS |     | Fell from the cane bed and started crying                                                    |             |  |
|      | MB  | BGS | Breastfeeding the baby                                                                       | Breast milk |  |
|      |     | DL2 | Setting the fire                                                                             |             |  |
|      |     | DL1 | Setting the fire also                                                                        |             |  |
| 5:29 | MB  |     | Setting her own fire                                                                         |             |  |
|      | BGS |     | Licking kuli-kuli                                                                            | Kuli-kuli   |  |
|      | DL2 |     | Adding firewood                                                                              |             |  |
| 5:34 | BB1 | BGS | Giving the child kunu                                                                        | Kunun maiwa |  |
| 5:39 | BGS |     | Licking kunu from the floor                                                                  |             |  |
|      | MB  |     | Washing rice in a basin                                                                      |             |  |
|      | BGS |     | Crawling and playing around the house                                                        |             |  |
|      | DL2 |     | Making paste for kunu by adding water to the fine sieved flour obtained and mixing properly. | Kunu maiwa  |  |
| 5:04 | MB  |     | Adding rice to boiling water                                                                 | Rice        |  |
|      | BGS |     | The baby is crying                                                                           |             |  |
|      | BB2 | BGS | Carrying the baby while and he is still crying.                                              |             |  |
|      | DL1 |     | Setting the fire and placing pot on the fire                                                 |             |  |
| 5:54 | BGS |     | The baby is still crying                                                                     |             |  |
| 5:59 | MB  |     | Adding firewood to fire                                                                      |             |  |
|      | DL2 |     | Pouring hot water into a big bucket of paste to make kunu                                    | Kunun maiwa |  |

|      |     |     |                                                                    |              |  |
|------|-----|-----|--------------------------------------------------------------------|--------------|--|
| 6:04 | MB  |     | Adjusting the firewood                                             |              |  |
|      |     | BGS | Taking him to his uncle's house                                    |              |  |
|      | DL2 |     | Adding small of the paste fetched from the kunu to make it thicker | Kunun maiwa  |  |
| 6:09 | MB  |     | Adding water to the rice on the fire                               |              |  |
| 6:14 | MB  |     | Adding firewood                                                    |              |  |
|      | BGS |     | Playing with elder sister, but he is crying                        |              |  |
| 6:19 | MB  | BGS | Breastfeeding the child                                            | Breast milk  |  |
|      | DL2 |     | Adding tamarind water to the kunu                                  | Kunun maiwa  |  |
|      | MB  |     | Adding firewood to the fire                                        |              |  |
| 6:24 | BB3 | BGS | Feeding the child kosan rogo                                       | Cassava bean |  |
| 6:29 |     |     | Eating kosan rogo                                                  |              |  |
| 6:34 | MB  |     | Checking rice on the fire                                          |              |  |
|      | BGS |     | Playing and crawling around                                        |              |  |
| 6:39 | MB  |     | Bringing the pot down from the fire                                |              |  |
|      | DL  |     | Adding sugar and mixing the kunu again                             |              |  |
|      | BGS |     | Playing with stones                                                |              |  |
|      |     |     |                                                                    |              |  |

## ***FIELD NOTES***

Data collector: The mother of the child was asked if she has administered the MNP to the child today

Mother's response: *'I administer one sachet to the child everyday but I haven't done that today because it was unfortunate that the leftover kunun maiwa has become fermented. I decided to wait till evening after a new kunu has been prepared.'*

Husband's: *'she has been administering the MNP ever since it was brought'*

Primary Questions (Complete after you complete data collection):

From what you have seen observing THIS HOUSEHOLD, please answer the following questions in detail:

| Question                                                                                                                                               | Write your <u>detailed</u> response here                                                                                                                                                                             |
|--------------------------------------------------------------------------------------------------------------------------------------------------------|----------------------------------------------------------------------------------------------------------------------------------------------------------------------------------------------------------------------|
| 1. In this household, what would be the best way(s) to give nutritional supplements such as an MNP to young children to ensure compliance?<br><br>Why? | The best way to give the MNP in this is through then mother.<br><br>Because the child is always with the mother, she carries her along all the time. She also stays beside the child even he is sleeping or playing. |
| 2. In this household, who is favored during meal                                                                                                       | I was opportune to see the meal sharing during the day when few                                                                                                                                                      |

|                                                                                                                                        |                                                                                                                                                                                                                                                                                                                                                                                                                                                                                                                                       |
|----------------------------------------------------------------------------------------------------------------------------------------|---------------------------------------------------------------------------------------------------------------------------------------------------------------------------------------------------------------------------------------------------------------------------------------------------------------------------------------------------------------------------------------------------------------------------------------------------------------------------------------------------------------------------------------|
| <p>preparation or feeding?</p> <p>How is this favoritism expressed?</p>                                                                | <p>children were eating. I realized that it is shared amongst peer group and the younger children are more favored.</p> <p>The younger ones are served first and to their satisfaction and the little ones are mostly fed by their mothers.</p>                                                                                                                                                                                                                                                                                       |
| <p>3. How could we promote the MNP supplement for this family that would attract their attention?</p> <p>Who would they listen to?</p> | <p>The MNP should be given to all the mothers with children of the required age in the household since it is an extended household.</p> <p>They will listen to their husbands and their father in-law. Also the mother-in-law because, I observed she is well respected by her daughter in-laws although she is always by her side. Also they are answerable to her orders and take commands from her.</p>                                                                                                                            |
| <p>4. In this household, what would be the best ways to promote the MNP but limit how much it would be shared?</p> <p>Why?</p>         | <p>There should be proper sensitization about the MNP; also its mode of administration should be properly stated to the caregivers and husbands/mother in-laws. Also food sharing among peer group should either be discouraged or they should be told to take the small portion and add the MNP first, after the child finishes, he can be fed by the other siblings.</p> <p>Because if it is clearly stated and its importance stated also, they will consider it as medicine and will make sure it is only given to the child.</p> |
| <p>5. What other issues and</p>                                                                                                        | <p>The major concern or challenge that maybe facing this family is that</p>                                                                                                                                                                                                                                                                                                                                                                                                                                                           |



|                                                                                                                                                                                                                        |                                                                                                                                                                                                                                                                                       |
|------------------------------------------------------------------------------------------------------------------------------------------------------------------------------------------------------------------------|---------------------------------------------------------------------------------------------------------------------------------------------------------------------------------------------------------------------------------------------------------------------------------------|
| <p>concerns did you see with this family that are important for us to consider with regard to introduction of an MNP?</p> <p>Why?</p>                                                                                  | <p>it is an extended family with 2 mother in-laws and 5 daughter in-laws.</p> <p>Because all the daughter in-laws are caregiver and they all have to be issued the MNP to overcome the issue of discouraging other caregivers within the household from using it because of envy.</p> |
| <p>6. Based on your experience observing this child today, do you believe reactivity negatively impacted your ability to see the food-related behaviors of the child?</p> <p>Please explain your answer in detail.</p> | <p>NO</p> <p>Because the child just had a few meal intake throughout my stay because he is just 7months and is practicing complementary feeding little by little.</p>                                                                                                                 |
