# Supplementary material for: Acceptance and compliance with micronutrient powder (MNP) among children aged 6–23 months in northern Nigeria
Source: PLOS journal article supplement (doi:10.1371/journal.pgph.0000961), 2022-10-17
Supplement: S8 (10.1371/journal.pgph.0000961.s008) [file journal.pgph.0000961.s008]

## SPOT CHECK RECORDING FORM

State: Adamawa LGA: \_\_\_\_Ganye\_\_\_\_ Community: \_Sandoka\_

Name of caregiver (female): Hafsat Haruna

Name or caregiver (male): .....

Sex of index child: \_Male\_\_\_\_ Age of index child (in months): \_9 months\_\_\_\_

### Spot Check Information

1. Date of MNP distribution to household (circle option below based on LGA name above):

🚦 **Kebbi:** BirninKebbi&Jega LGA: **June 16**

🚦 **Kebbi:** Danko-wasagu: **June 17**

🚦 **Adamawa:**Song, Ganye: **(June 18)**

🚦 **Adamawa:**Guyuk **June 19**

2. Date of Spot Check Observation: \_\_\_\_6/7/2015\_\_\_\_

3. Number of sachets remaining(Ask the caregiver to show you and count the specific number of sachets remaining):

41

4. Number of sachets that should remainusing one MNP sachet per day (Analyst only):

43

5. Number of sachets remaining / number of sachets should be remaining(Analyst only):

\_\_\_\_41\_\_\_\_ / \_\_\_\_43\_\_\_\_ = 95.3 %

## **Probes**

**Question 1.** You have **XX** MNP sachets remaining. Explain how easy or difficult it was to use the MNP product on a daily basis for your child 6 – 23 months? (Circle one answer)

**Very Difficult**

**(Difficult)**

**Easy**

**Very Easy**

**Question 2.** Describe any specific challenges that you faced that made the MNP difficult to use on a daily basis?

The sachet of the MNP is too thick and therefore makes it difficult for me to use or to unseal and also the MNP takes like 2 to 3 minutes to dissolve into kunu. These are my experience.

**Question 3.** Describe specific aspects of the MNP product that you or your child enjoyed that made it easier to use on a daily basis?

- After mixing the MNP into the kunu and I use a small spoon to feed my child. That way, it makes it easier for the child to accept the food. The fact that I use a small spoon daily to feed him is very easy for me.

**Question 4.** What questions do you have about the MNP based on your experience using it?

- Due to current health condition of my child (he is suffering from the attack of evil spirit). We use order herbs and leaves other means like prayers for the child. I want to know if I should continue to administer the MNP and still use those herbs and leaves for the child because of his present condition.

**Question 5.** What specific recommendations do you have that we can do as a program to make the MNP easier to use on a daily basis?

The MNP small sachet should be made in a paper form or a paper sachet so that it would be made easy for us to use on a daily basis because sometimes I use razor blade to tear the sachet and we all know as a mother you are not expected to keep razor blade anywhere close because of other children that is only recommendation regarding this product.
