# Supplementary material for: Acceptance and compliance with micronutrient powder (MNP) among children aged 6–23 months in northern Nigeria
Source: PLOS journal article supplement (doi:10.1371/journal.pgph.0000961), 2022-10-17
Supplement: S8 (10.1371/journal.pgph.0000961.s008) [file journal.pgph.0000961.s008]

### 1.1.1 Instrument F –Direct Observation Form

#### <<Instrument F Direct Observation Form>>

**PI Name:** PragmaMathema,Stephen Kodish

**Study Title:** Formative research to develop an infant and young child feeding (IYCF) intervention with micronutrient powder (MNP) for children aged 6 – 23 months

**PI Version/Date:** Version1.0/January 24, 2015

Date: \_6/07/2015\_\_\_\_\_Location: \_\_DADIRI CMMUNITY, GANYE LGA\_\_\_\_\_

Data Collector: \_\_AISHA ALIYU DAHIRU\_\_\_\_Participant ID: \_\_\_\_Mud House with tree in front\_\_\_\_\_

Main goals of this direct observation are to answer the following questions:

1. In this household, what would be the best way(s) to give nutritional supplements to young children? Why?
2. In this household, describe the food sharing that you observe throughout the meal. Are there any predictable patterns?
3. In this household, who is favored and how is this favoritism expressed during meal preparation and eating?

(TEAR OFF AT PERFORATED DOTTED LINE BELOW)

-----  
-----

PARTICIPANT ID: \_\_\_\_\_

Household Composition Table (Fill out as you do data collection)

| INITIALS | SEX (M/F) | AGE (estimated) | Relationship to household | Description                                 |
|----------|-----------|-----------------|---------------------------|---------------------------------------------|
| M        | F         | 2years          | Mother                    | Wearing red wrapper with black shirt        |
| B        | M         | 18 months       | Baby boy                  | Wearing green shirt and trouser             |
| H        | M         | 35years         | Head of household         | Wearing white kaffen and is dark            |
| NB       | F         | 15months        | Neighbors child           | Wearing pink skirt with red shirt           |
| N1       | F         | 29years         | Neighbor                  | Wearing brown gown wrapper with a head gear |

|    |   |         |           |                                              |
|----|---|---------|-----------|----------------------------------------------|
| N2 | F | 27years | Neighbor  | Wearing green wrapper with a white head gear |
| B2 | M | 8years  | Older son | Wearing brown kaffen                         |
| B3 | M | 6years  | Older son | Wearing green shirts with yellow shirt       |
|    |   |         |           |                                              |
|    |   |         |           |                                              |
|    |   |         |           |                                              |
|    |   |         |           |                                              |
|    |   |         |           |                                              |
|    |   |         |           |                                              |
|    |   |         |           |                                              |

PARTICIPANT ID: \_\_\_\_\_

| TIME  | ACTOR INITIALS | RECIPIENT INITIALS | WHAT HAPPENED                                                | FOOD       | Reactivity |
|-------|----------------|--------------------|--------------------------------------------------------------|------------|------------|
| 11:00 | M              | B                  | Carrying child on her back                                   |            |            |
| 11:05 | M              |                    | Sweeping                                                     |            |            |
| 11:10 | M              |                    | Sweeping                                                     |            |            |
| 11:15 | M              |                    | Sweeping                                                     |            |            |
| 11:20 | M              |                    | Washing hands with soap and water                            |            |            |
| 11:25 | M              |                    | Serving kunu into cup from flask                             | Kunu dawa  |            |
| 11:30 | M              | B                  | Feeding child the kunu while sitting on her lap              | Kunu dawa  |            |
| 11:31 | M              | B                  | Feeding child kunu. He is taking the kunu with enthusiasm    | Kunun dawa |            |
|       |                |                    |                                                              |            |            |
| 11:32 | M              | B                  | Feeding the child kunu the child across and uncross his legs | Kunun dawa |            |

| TIME  | ACTOR INITIALS | RECIPIENT INITIALS | WHAT HAPPENED                                                                         | FOOD       | Reactivity |
|-------|----------------|--------------------|---------------------------------------------------------------------------------------|------------|------------|
|       |                |                    | clapping hands                                                                        |            |            |
| 11:33 | M              | B                  | Feeding child kunu                                                                    | Kunun dawa |            |
| 11:34 | M              | B                  | Still feeding the child kunu and he is willing to drink the kunu                      | Kunun dawa |            |
| 11:35 | M              | B                  | feeding the child the last spoon full of kunu                                         | Kunun dawa |            |
| 11:40 | M              | B                  | Carrying child on her laps                                                            |            |            |
| 11:45 | H              |                    | Chatting with mother                                                                  |            |            |
| 11:50 | H              | B                  | Playing with child around the house                                                   |            |            |
| 11:55 | H              | B                  | Playing with child                                                                    |            |            |
| 12:00 | H              | B                  | Plaiting neighbors child                                                              |            |            |
| 12:05 | B              |                    | Standing beside the father                                                            |            |            |
| 12:10 | B              |                    | Playing beside the father on the ground the father is sitting on a stool under a tree |            |            |
| 12:10 | M              | NB                 | Still plaiting neighbors child                                                        |            |            |
| 12:15 | H              | B                  | Sitting on fathers laps carrying child on his laps. Playing with the child.           |            |            |
| 12:20 | M              | N1                 | Chatting with neighbor                                                                |            |            |
| 12:20 | B              |                    | Playing with father's mobile phone                                                    |            |            |
| 12:25 | M              | NB                 | Still plaiting neighbors child                                                        |            |            |
| 12:30 | M              | NY                 | Chatting with the child                                                               |            |            |
| 12:30 | H              | B                  | Chatting with the child                                                               |            |            |
| 12:35 | H              | B                  | Showing child something on the phone when is making the child to laugh                |            |            |
| 12:40 | H              | B                  | Carrying child on his laps playing with him                                           |            |            |
| 12:45 | M              | N1                 | Chatting with neighbor                                                                |            |            |

| TIME  | ACTOR INITIALS | RECIPIENT INITIALS | WHAT HAPPENED                                                      | FOOD        | Reactivity |
|-------|----------------|--------------------|--------------------------------------------------------------------|-------------|------------|
| 12:50 | M              | NB                 | Finishing up plaiting the neighbors child                          |             |            |
| 12:50 | H              | B                  | Giving the child water to drink from a large silver water cup      |             |            |
| 12:55 | M              |                    | Washing hands with soap and water after plaiting with him          |             |            |
| 13:00 | H              | B                  | Carrying child on his laps playing with him                        |             |            |
| 13:05 | M              |                    | Sitting under the lime tree                                        |             |            |
|       |                |                    |                                                                    |             |            |
| 13:10 | H              |                    | Performing ablution to go to mosque                                |             |            |
|       |                |                    |                                                                    |             |            |
| 13:05 | B              |                    | Crying, he wants to follow father to the mosque                    |             |            |
|       |                |                    |                                                                    |             |            |
|       |                |                    |                                                                    |             |            |
| 13:15 | M              | B                  | Carrying child on her laps consoling him                           |             |            |
|       |                |                    |                                                                    |             |            |
| 13:20 | M              | B                  | Breast feeding the child                                           | Breast milk |            |
| 13:25 | M              | B                  | Breast feeding the child                                           | Breast milk |            |
| 13:30 | M              | M, B               | Breast feeding the child                                           | Breast milk |            |
| 13:35 | H              | B                  | Chatting with the mother and child                                 |             |            |
| 13:40 | M              | B                  | Carrying child on her laps                                         |             |            |
| 13:45 | M              | B                  | Playing with child, lifting him up and down. The child is laughing |             |            |
|       |                |                    |                                                                    |             |            |
| 13:50 | B              |                    | Crying because mother kept him on the mat and stood up             |             |            |
|       |                |                    |                                                                    |             |            |

| TIME  | ACTOR INITIALS | RECIPIENT INITIALS | WHAT HAPPENED                                                                   | FOOD | Reactivity |
|-------|----------------|--------------------|---------------------------------------------------------------------------------|------|------------|
| 13:50 | M              | B                  | Carrying child and going into the room                                          |      |            |
| 13:55 | M              |                    | Mother playing                                                                  |      |            |
| 13:55 | B              |                    | Playing beside the mother while she is praying                                  |      |            |
| 14:00 | M              | B                  | Carrying child on her laps                                                      |      |            |
| 14:05 | M              | B                  | Playing with child on her laps                                                  |      |            |
| 14:10 | B              |                    | Playing on a mat on the veranda alone                                           |      |            |
| 14:15 | B              | NB                 | Playing with neighbors child on the mat under the veranda                       |      |            |
|       |                |                    |                                                                                 |      |            |
| 14:20 | B              | NB                 | Playing with the neighbors child on the mat                                     |      |            |
| 14:25 | M              |                    | Sitting under lime tree on a small stool                                        |      |            |
| 14:30 | M              | N2                 | Chatting with neighbors                                                         |      |            |
| 14:35 | M              | N1, N2             | Chatting with neighbors                                                         |      |            |
| 14:40 | B              | NB                 | Playing with neighbors child                                                    |      |            |
| 14:45 | M              |                    | Picking dirt out of mane she brought out from the room                          |      |            |
|       |                |                    |                                                                                 |      |            |
| 14:50 | M              | N1, N2             | Chatting with neighbors while picking dirt out of maize. They are assisting her |      |            |
|       |                |                    |                                                                                 |      |            |
| 14:55 | B              |                    | Playing alone on the mat on the veranda                                         |      |            |
| 15:00 | B2             | B                  | Joins child on the mat playing with him                                         |      |            |
| 15:05 | B2             | B                  | Playing with child under the veranda                                            |      |            |
| 15:10 | B              |                    | Playing around the veranda with the older son                                   |      |            |

| TIME  | ACTOR INITIALS | RECIPIENT INITIALS | WHAT HAPPENED                                           | FOOD        | Reactivity |
|-------|----------------|--------------------|---------------------------------------------------------|-------------|------------|
| 15:15 | B3             |                    | Washing hands with water                                |             |            |
| 15:20 | M              | N1,N2              | Chatting with neighbors while picking dirt out of maize |             |            |
|       |                |                    |                                                         |             |            |
| 15:25 | B2             | B                  | Carrying child on his back moving around the house      |             |            |
| 15:25 | B              |                    | Laughing and screaming on older son's back              |             |            |
| 15:30 | B2             | B, M               | Handing the mother the child                            |             |            |
| 15:35 | M              | B                  | Carrying child on her laps                              |             |            |
| 15:40 | B              | NB                 | Standing beside mother playing with neighbors child     |             |            |
| 15:45 | M              | B                  | Carrying child on her laps breast feeding him           | Breast milk |            |
| 15:50 | M              | B                  | Breast feeding the child                                | Breast milk |            |
| 15:55 | M              | B                  | Breast feeding the child                                | Breast milk |            |
| 16:00 | M              | B                  | Breast feeding the child                                | Breast milk |            |
| 16:05 | B2             | B                  | Carrying child from mother's laps                       |             |            |
| 16:10 | B2             | B                  | Carrying child                                          |             |            |
| 16:15 | M              | B                  | Carrying child on her laps                              |             |            |
| 16:20 | B              |                    | Grabbing mothers breast to breast feed                  |             |            |
| 16:20 | M              | B                  | Watching as the child tries to breast feed              | Breast milk |            |
| 16:25 | M              | B                  | Breast feeding the child                                | Breast milk |            |
| 16:30 | M              | B                  | Turning the child to breast feed from the other breast  | Breast milk |            |
| 16:35 | M              |                    | Starting fire                                           |             |            |
| 16:40 | M              |                    | Starting fire                                           |             |            |

|       |                |                    |                                                                                                                     |                 |            |
|-------|----------------|--------------------|---------------------------------------------------------------------------------------------------------------------|-----------------|------------|
| 16:45 | M              |                    | Waiting for water to boil                                                                                           |                 |            |
| 16:45 | M              |                    | Mixing groundnut paste in a bowl with water                                                                         | Groundnut paste |            |
| 16:50 | M              |                    | Adding guinea corn flouring into groundnut paste mixture                                                            | Groundnut paste |            |
| 16:55 | M              |                    | Adding mixture into boiling water on fire                                                                           |                 |            |
| 17:00 | M              |                    | Stirring mixture to make kunun gyeda                                                                                | Kunun gyeda     |            |
| 17:05 | M              |                    | Kunun gyeda is ready to be served                                                                                   |                 |            |
| TIME  | ACTOR INITIALS | RECIPIENT INITIALS | WHAT HAPPENED                                                                                                       | FOOD            | Reactivity |
| 17:05 | M              |                    | Serving kunu into flask                                                                                             | Kunun gyeda     |            |
| 17:05 | M              |                    | serving a portion of kunu into a small cup                                                                          | Kunun gyeda     |            |
| 17:10 | M              |                    | Serving kunu to cool before feeding child                                                                           | Kunun gyeda     |            |
| 17:15 | M              |                    | Adding MNP into the warn kunu                                                                                       | Kunun gyeda     |            |
| 17:15 | M              |                    | Stirring MNP to ensure it dissolves into the kunu and covers it                                                     |                 |            |
| 17:20 | M              |                    | Checking the firewood                                                                                               |                 |            |
| 17:20 | M              |                    | Putting another pot of water on fire                                                                                |                 |            |
| 17:25 | M              | B                  | Feeding the child the kunu that was mixed with MNP. The child is taking the kunu like he previously with enthusiasm | Kunun gyeda     |            |
| 17:26 | M              | B                  | Feeding the child kunu mixed with MNP and the child was drinking the kunu with a spoon sitting on the mother's lap  | Kunun gyeda     |            |
| 17:27 | M              | B                  | Still feeding the child                                                                                             | Kunun gyeda     |            |
| 17:28 | M              | B                  | Still feeding the child                                                                                             | Kunun gyeda     |            |
| 17:29 | M              | B                  | Feeding the child kunu                                                                                              | Kunun gyeda     |            |
| TIME  | ACTOR INITIALS | RECIPIENT INITIALS | WHAT HAPPENED                                                                                                       | FOOD            | Reactivity |

|       |                |                    |                                                                                    |                           |            |
|-------|----------------|--------------------|------------------------------------------------------------------------------------|---------------------------|------------|
| 17:30 | M              | B                  | Washing child's hands and mouth after feeding                                      |                           |            |
| 17:30 | M              |                    | Checking the firewood                                                              |                           |            |
| 17:35 | M              |                    | Waiting for water to boil water to add guinea corn flour which is kept on the side | water guinea corn flour   |            |
| 17:40 | M              |                    | Adding guinea corn flour into the boiling water on the fire                        | water guinea corn flour   |            |
| 17:40 | B              |                    | Playing around the house, running around                                           |                           |            |
| 17:45 | M              |                    | Meal is ready to be served                                                         | Guinea corn meal          |            |
| 17:45 | M              |                    | Serving meal into a single bowl                                                    | Guinea corn meal          |            |
| 17:50 | M              |                    | Washing hands                                                                      |                           |            |
| 17:50 | M              |                    | Grinding onion and pepper                                                          | Onion pepper              |            |
| 17:55 | M              |                    | Adding ground pepper and onion into pot on fire                                    | Onion pepper              |            |
| 18:00 | B              |                    | Running around the house laughing                                                  |                           |            |
| TIME  | ACTOR INITIALS | RECIPIENT INITIALS | WHAT HAPPENED                                                                      | FOOD                      | Reactivity |
| 18:05 | M              |                    | Adding bulbar flour into the boiling pot and stirring                              | Baobab flour              |            |
| 18:10 | M              |                    | Soup is ready to be served                                                         | Baobab flour (miyan kuka) |            |
| 18:10 | M              |                    | Serving soup into a single bowl                                                    | Miyan kuka                |            |
| 18:15 | M              |                    | Washing utensils used in cooking                                                   |                           |            |
| 18:20 | M              |                    | Washing utensils used in cooking                                                   |                           |            |
| 18:25 | B              |                    | Playing on the mat undr the veranda                                                |                           |            |
| 18:35 | M              |                    | Sweeping the cooking area                                                          |                           |            |
| 18:40 | M              |                    | Sweeping                                                                           |                           |            |
| 18:45 | M              |                    | Washing hands with soap and water                                                  |                           |            |



| 18:50 | M              |                    | Serving meal to the husband and children in separate bowls. The husband alone and the children eat together | Tuwon dawa             |            |
|-------|----------------|--------------------|-------------------------------------------------------------------------------------------------------------|------------------------|------------|
| TIME  | ACTOR INITIALS | RECIPIENT INITIALS | WHAT HAPPENED                                                                                               | FOOD                   | Reactivity |
| 18:51 | M              |                    | Serving food for herself in a separate bowl                                                                 | Tuwon dawa, miyan kuka |            |
| 18:52 | M              | B                  | Eating together with the child. Feeding the child from her bowl                                             | Tuwon dawa, miyan kuka |            |
| 18:53 | H              |                    | Eating alone in a separate bowl                                                                             | Tuwon dawa, miyan kuka |            |
| 18:54 | M              | B                  | Assisting the child to eat from her bowl                                                                    | Tuwon dawa, miyan kuka |            |
| 18:55 | B2             |                    | Eating together with brother from the same bowl                                                             | Tuwon dawa, miyan kuka |            |
| 18:56 | B3             |                    | Eating together with older son from the same bowl                                                           | Tuwon dawa, miyan kuka |            |
| 18:57 | M              | B                  | Still assisting child to eat from her bowl                                                                  | Tuwon dawa, miyan kuka |            |
| 18:57 | H              |                    | Eating alone from a separate bowl                                                                           | Tuwon dawa, miyan kuka |            |
|       |                |                    |                                                                                                             |                        |            |
| 18:59 | M              | B                  | Washing the child's hands and mouth                                                                         |                        |            |
|       |                |                    |                                                                                                             |                        |            |
| 19:00 | M              | B                  | Giving child water to drink from a large silver cup                                                         | Water                  |            |

[illegible]

[illegible]

[illegible]

[illegible]

PARTICIPANT ID: \_\_\_\_\_

Primary Questions (Complete after you complete data collection):

From what you have seen observing THIS HOUSEHOLD, please answer the following questions in detail:

| Question                                                                                                                                                      | Write your <u>detailed</u> response here                                                                                                                                                                                                                                                                         |
|---------------------------------------------------------------------------------------------------------------------------------------------------------------|------------------------------------------------------------------------------------------------------------------------------------------------------------------------------------------------------------------------------------------------------------------------------------------------------------------|
| <p>1. In this household, what would be the best way(s) to give nutritional supplements such as an MNP to young children to ensure compliance?</p> <p>Why?</p> | <p>The best way to ensure compliance is to keep reminding the mother of the importance of the MNP to her child.</p> <p>The mother should ensure she has a separate bowl for feeding the child MNP with.</p>                                                                                                      |
| <p>2. In this household, who is favored during meal preparation or feeding?</p> <p>How is this favoritism expressed?</p>                                      | <p>The parents and older children are favoured because the last meal was solid.</p> <p>The father and the older children were favoured because the quantity of their food was more than the mother's.</p> <p>The little child was feed carefully by the mother</p>                                               |
| <p>3. How could we promote the MNP supplement for this family that would attract their attention?</p> <p>Who would they listen to?</p>                        | <p>MNP can be promoted to this family through the mother.</p> <p>The father can also be an influence because he was asking if the child was given the MNP when he came into the house.</p> <p>A radio was playing at the neighbors and it was heard in his household even though they did not put theirs on.</p> |

|                                                                                                                                                                                                                        |  |
|------------------------------------------------------------------------------------------------------------------------------------------------------------------------------------------------------------------------|--|
|                                                                                                                                                                                                                        |  |
| <p>4. In this household, what would be the best ways to promote the MNP but limit how much it would be shared?</p> <p>Why?</p>                                                                                         |  |
| <p>5. What other issues and concerns did you see with this family that are important for us to consider with regard to introduction of an MNP?</p> <p>Why?</p>                                                         |  |
| <p>6. Based on your experience observing this child today, do you believe reactivity negatively impacted your ability to see the food-related behaviors of the child?</p> <p>Please explain your answer in detail.</p> |  |
