# Supplementary material for: Acceptance and compliance with micronutrient powder (MNP) among children aged 6–23 months in northern Nigeria
Source: PLOS journal article supplement (doi:10.1371/journal.pgph.0000961), 2022-10-17
Supplement: S8 (10.1371/journal.pgph.0000961.s008) [file journal.pgph.0000961.s008]

# SPOT CHECK RECORDING FORM

State: Kebbi LGA: Birnin Kebbi Community: Bakan Yadiya

Sex of index child: Male Age of index child (in months): 14months

## Spot Check Information

1. Date of MNP distribution to household (circle option below based on LGA name above):

📍 Kebbi: BirninKebbi&Jega LGA: **June 16**

📍 Kebbi: Danko-wasagu: **June 17**

📍 Adamawa: Song, Ganye: **June 18**

📍 Adamawa:Guyuk **June 19**

2. Date of Spot Check Observation: 02/07/15

3. Number of sachets remaining(Ask the caregiver to show you and count the specific number of sachets remaining):

44

4. Number of sachets that should remain using one MNP sachet per day (Analyst only):

45

5. Number of sachets remaining / number of sachets should be remaining(Analyst only):

\_\_\_\_\_44\_\_\_\_ / \_\_\_\_\_45\_\_\_\_\_ = \_\_\_\_\_97.8\_\_\_\_\_ %

## **Probes**

**Question 1.** You have **XX** MNP sachets remaining. Explain how easy or difficult it was to use the MNP product on a daily basis for your child 6 – 23 months? (Circle one answer)

**Very Difficult**

**Difficult**

**Easy**

**Very Easy**

**Question 2.** Describe any specific challenges that you faced that made the MNP difficult to use on a daily basis?

**Question 3.** Describe specific aspects of the MNP product that you or your child enjoyed that made it easier to use on a daily basis?

He was sick when they gave him MNP but when I started giving him I observed that he started improving, so I was encourage that is why I don't forget to give him and now my child that was wasted without strength now is strong and can beat all his age mate

**Question 4.** What questions do you have about the MNP based on your experience using it?

This MNP is good but I don't know the type of sickness is meant for, please can you tell me the name of the sickness

**Question 5.** What specific recommendations do you have that we can do as a program to make the MNP easier to use on a daily basis?

Please let it be free so that every child can have access to it because you can see we are poor
