# Supplementary material for: Acceptance and compliance with micronutrient powder (MNP) among children aged 6–23 months in northern Nigeria
Source: PLOS journal article supplement (doi:10.1371/journal.pgph.0000961), 2022-10-17
Supplement: S8 (10.1371/journal.pgph.0000961.s008) [file journal.pgph.0000961.s008]

# SPOT CHECK RECORDING FORM

State: Kebbi LGA: Birnin kebbi Community: Unguwannainu

Sex of index child: F Age of index child (in months): 8

## Spot Check Information

1. Date of MNP distribution to household (circle option below based on LGA name above):

🚦 Kebbi: BirninKebbi&Jega LGA: **June 16**

🚦 Kebbi: Danko-wasagu: **June 17**

🚦 Adamawa:Song, Ganye: **June 18**

🚦 Adamawa:Guyuk **June 19**

2. Date of Spot Check Observation: 04/07/15

3. Number of sachets remaining(Ask the caregiver to show you and count the specific number of sachets remaining):

40

4. Number of sachets that should remainusing one MNP sachet per day (Analyst only):

43

5. Number of sachets remaining / number of sachets should be remaining(Analyst only):

40 / 43 = 93.0 %

## Probes

**Question 1.** You have **XX** MNP sachets remaining. Explain how easy or difficult it was to use the MNP product on a daily basis for your child 6 – 23 months? (Circle one answer)

**Very Difficult**

**Difficult**

**Easy**

**Very Easy**

**Question 2.** Describe any specific challenges that you faced that made the MNP difficult to use on a daily basis?

**Question 3.** Describe specific aspects of the MNP product that you or your child enjoyed that made it easier to use on a daily basis?

It is easier to use and we accept it and is easier to administer to the child food because it is colorless and tasteless, the child will not even know that the MNP is in his feed

**Question 4.** What questions do you have about the MNP based on your experience using it?

**Question 5.** What specific recommendations do you have that we can do as a program to make the MNP easier to use on a daily basis?

We need more enlightenment and education of our people in the community
