# Supplementary material for: Acceptance and compliance with micronutrient powder (MNP) among children aged 6–23 months in northern Nigeria
Source: PLOS journal article supplement (doi:10.1371/journal.pgph.0000961), 2022-10-17
Supplement: S8 (10.1371/journal.pgph.0000961.s008) [file journal.pgph.0000961.s008]

### 1.1.1 Instrument F –Direct Observation Form

#### <<Instrument F Direct Observation Form>>

**PI Name:** PragmaMathema,Stephen Kodish

**Study Title:** Formative research to develop an infant and young child feeding (IYCF) intervention with micronutrient powder (MNP) for children aged 6 – 23 months

**PI Version/Date:** Version1.0/January 24, 2015

Date: 28/06/15 Location: Biki

Data Collector: Samira Adamu

Main goals of this direct observation are to answer the following questions:

1. In this household, what would be the best way(s) to give nutritional supplements to young children? Why?
2. In this household, describe the food sharing that you observe throughout the meal. Are there any predictable patterns?
3. In this household, who is favored and how is this favoritism expressed during meal preparation and eating?

Household Composition Table (Fill out as you do data collection)

| INITIALS | SEX (M/F) | AGE (estimated) | Relationship to household                  | Description (not necessary)            |
|----------|-----------|-----------------|--------------------------------------------|----------------------------------------|
| BB       | M         | 22months        | Youngest child in the house                | Wearing jersey shirt and blue shot     |
| MB       | F         | 29 years        | Mother of the (2 <sup>nd</sup> wife) child | Wearing green and red attire           |
| W1       | F         | 30years         | First wife of the house                    | Wearing light green and orange wrapper |
| W2       | F         | 15years         | Youngest wife                              | Wearing blue and white attire          |
| DL       | F         | 16years         | Wife of the eldest son                     | Wearing green top and maroon trouser   |
| BB2      | M         | 6years          | Son of the house                           | Wearing light blue shirt and trouser   |
| BB3      | M         | 6years          | Son of the house                           | Wearing dark purple and black attire   |
| BB1      | M         | 7years          | Son of the house                           | Wearing black shorts                   |
|          |           |                 |                                            |                                        |

|     |   |         |                               |                               |
|-----|---|---------|-------------------------------|-------------------------------|
|     |   |         |                               |                               |
| BB4 | M | 17years | Youngest child (step brother) | Wearing green and milk shorts |
| FB  | M | 50years | Father of the house           |                               |
| BG2 | F | 4years  | Daughter of the house         |                               |
| BG1 | F | 7years  | Daughter of the house         | Wearing black and white hijab |
| BG3 |   |         |                               |                               |
|     |   |         |                               |                               |
|     |   |         |                               |                               |

PARTICIPANT ID: \_\_\_\_\_

| TIME | ACTOR INITIALS | RECIPIENT INITIALS | WHAT HAPPENED                                                                                                                                     | FOOD         | Reactivity |
|------|----------------|--------------------|---------------------------------------------------------------------------------------------------------------------------------------------------|--------------|------------|
| 8:40 | MB             |                    | Carrying the child on her laps and sieving grounded millet flour to remove coarseness                                                             |              |            |
|      | W1             |                    | Arranging locally made clay pans, and bowls into local oven made of clay and sand with ignited charcoal in the oven to bake pans, pots and bowls. |              |            |
|      | W2             |                    | Cutting black selotape into different sizes which is used in making henna decorations for women on the leg                                        |              |            |
|      | DL             |                    | Pounding some of the coarse flour obtained after i.e being sieved by the step mother in-law                                                       |              |            |
|      | BB3            | BB4                | Feeding the child with kunun millet                                                                                                               | Kunun millet |            |
| 8:45 | BB             |                    | Playing with locally made wheel fixed with stick using a nail and eating a fruit called 'kade' around the house                                   | 'kade'       |            |

| TIME | ACTOR INITIALS | RECIPIENT INITIALS | WHAT HAPPENED                                                                                                                                    | FOOD             | Reactivity |
|------|----------------|--------------------|--------------------------------------------------------------------------------------------------------------------------------------------------|------------------|------------|
|      |                |                    | while running and directing it just like a ride                                                                                                  |                  |            |
|      | BB3            | BB4                | Feeding the child with kunun millet                                                                                                              | Kunun millet     |            |
|      | W1             |                    | Sweeping around the locally made oven                                                                                                            |                  |            |
|      | W2             |                    | Still cutting the selotape for patterns use for henna decoration for women on her leg (foot)                                                     |                  |            |
|      | MB             |                    | Still sieving the grounded millet flour                                                                                                          |                  |            |
|      | DL             |                    | Still pounding the coarse millet flour to extract more fine flour after being sieved again                                                       |                  |            |
|      | BB1&BB2        |                    | Playing ball together in another corner of the house                                                                                             |                  |            |
| 8:50 | BB             |                    | Crying because he fell on the floor while riding his locally made wheel pusher                                                                   |                  |            |
|      | MB             |                    | Arranging locally made clay pan, bowls and pots into another locally made oven to bake the clayed pans                                           |                  |            |
|      | DL             |                    | Sieving the pounded coarse flour to extract more flour                                                                                           |                  |            |
|      | W2             |                    | Going towards her apartment with a friend/guest                                                                                                  |                  |            |
| 8:55 | BB             |                    | Playing in the daughter in-law's apartment with his locally made wheel pusher and eating 'kade'                                                  | Shea butter food |            |
|      | DL             |                    | Spreading clothes on the rope tied to different walls for drying clothes and liners                                                              |                  |            |
| 9:00 | W2             |                    | Putting a small cup full of the properly mixed maize mixture which is semi solid into each of the small pans and bowls arranged into the locally |                  |            |

| TIME | ACTOR INITIALS | RECIPIENT INITIALS | WHAT HAPPENED                                                                                                                            | FOOD       | Reactivity |
|------|----------------|--------------------|------------------------------------------------------------------------------------------------------------------------------------------|------------|------------|
|      |                |                    | made oven and allowed to bake by covering with tray                                                                                      |            |            |
|      | MB             |                    | Also mixing another maize paste with salt and kanwa(potash)                                                                              |            |            |
|      | BB             |                    | Pushing the wheel and crying while moving towards the mother, because she is calling him to sit beside her as she mixing the maize paste |            |            |
|      | BB1,BB3&BB2    |                    | Climbing the 'kade' fruit tree and dancing to a song being played from outside the house                                                 |            |            |
| 9:05 | DL             |                    | Pounding the small remaining coarse millet flour                                                                                         |            |            |
|      | W1             | BB4                | Sweeping her room while backing the child                                                                                                |            |            |
|      | BB1,BB2&BB3    |                    | Still dancing on the 'kade' fruit tree while plugging the kade fruit and dropping them on the floor                                      |            |            |
|      | BB             |                    | Playing with sticks standing close to the mother while she is covering the oven with tray and placing a blanket over the tray            |            |            |
|      | DL             |                    | Backing the baby from the neighborhood and sieving the immediate pounded coarse millet flour to extract more fine flour                  |            |            |
|      | W1             |                    | Still sweeping the front of her room                                                                                                     |            |            |
|      | BB2&BB3        |                    | Sitting on the kade tree and eating plugged kade fruit and gisting with the sisters down                                                 | Kade       |            |
| 9:10 | BB             |                    | Sitting on the floor and playing with sieve and sand                                                                                     |            |            |
|      | BB2&BB3        |                    | Still sitting on the branches and eating kade fruit                                                                                      | Kade fruit |            |

| TIME | ACTOR INITIALS | RECIPIENT INITIALS | WHAT HAPPENED                                                                                                                                              | FOOD         | Reactivity |
|------|----------------|--------------------|------------------------------------------------------------------------------------------------------------------------------------------------------------|--------------|------------|
|      | MB             |                    | Sweeping the compound of the house                                                                                                                         |              |            |
|      | W1             |                    | Sitting on a stool in front of her house                                                                                                                   |              |            |
| 9:15 | BB             |                    | Sitting on the floor and drinking kunu alone                                                                                                               |              |            |
|      | MB             |                    | Still sweeping the compound floor                                                                                                                          |              |            |
|      | W1             |                    | Sitting in front of her room                                                                                                                               |              |            |
|      | BG1&BG2        |                    | Plugging the kade fruit using a long stick                                                                                                                 |              |            |
|      | DL             |                    | Making a paste of the millet flour grounded and sieved by adding water and mixing it properly with water to obtain a semi solid paste which is a bit thick |              |            |
| 9:20 | BB             | BB                 | Still drinking kunu alone                                                                                                                                  | Kunun millet |            |
|      | MB             |                    | Washing the pots and bowls used for mixing of maize mixture which is called 'hochi'                                                                        |              |            |
|      | DL             |                    | Pouring the millet paste in a small bowl under the sun                                                                                                     |              |            |
|      | BB4            |                    | Playing with shaft of millet in a bowl                                                                                                                     |              |            |
| 9:25 | BB             |                    | Drinking kunu and playing with stick                                                                                                                       |              |            |
|      | W1             |                    | Removing the baked hochi from the locally made oven and arranging on a tray                                                                                |              |            |
|      | F              |                    | Entering the house with hoe on his shoulder carrying animal feed towards the animal farm                                                                   |              |            |
| 9:30 | BB             |                    | Sitting close to the father and taking kunu along side 2 other siblings talking with the dad                                                               |              |            |
|      | W1             |                    | Using spoon to remove the                                                                                                                                  |              |            |

| TIME | ACTOR INITIALS | RECIPIENT INITIALS | WHAT HAPPENED                                                                                        | FOOD                | Reactivity |
|------|----------------|--------------------|------------------------------------------------------------------------------------------------------|---------------------|------------|
|      |                |                    | baked hochi from the pans                                                                            |                     |            |
|      | DL             |                    | Sitting and watching the step mother in-law                                                          |                     |            |
|      | W2             |                    | Gisting with the husband and playing with the child                                                  |                     |            |
|      | MB             |                    | Sweeping a corner of the compound under the tree                                                     |                     |            |
|      | BB             |                    | Playing with dad's slippers on the floor                                                             |                     |            |
| 9:35 | BB1            |                    | Playing and eating kade fruit in front of the house                                                  |                     |            |
|      | FB             | BG1,BG2&BB4        | Playing with the children                                                                            |                     |            |
|      | DL             |                    | Making beads necklace                                                                                |                     |            |
|      | MB             |                    | Removing baked hochi from the locally made oven and penalty arranging it on a mat                    |                     |            |
|      | W2             | BB4                | Wearing pant for the child                                                                           |                     |            |
| 9:40 | BB             |                    | Sitting near the daughter in-law and eating kade                                                     | Kade                |            |
|      | MB             |                    | Using spoon to remove the 'hochi' from the clay pans                                                 |                     |            |
|      | W1             | BB1                | Beating him with a stick and making him wash his hand with water and sand after the using the toilet |                     |            |
|      | W2             |                    | Mixing the henna (lalle powder) with water                                                           |                     |            |
|      | FB             |                    | Sitting and watching the activities of the house                                                     |                     |            |
| 9:45 | BB             | DL                 | Lying on her lap and eating kade fruit                                                               | Kade                |            |
|      | BB3            | BB3                | Eating tuwo and miyan kadi                                                                           | Tuwo and miyan kadi |            |
|      | W1             |                    | Arranging the hochi in a transparent polythene bag                                                   |                     |            |
|      | MB             |                    |                                                                                                      |                     |            |

| TIME  | ACTOR INITIALS | RECIPIENT INITIALS | WHAT HAPPENED                                                                                        | FOOD                       | Reactivity |
|-------|----------------|--------------------|------------------------------------------------------------------------------------------------------|----------------------------|------------|
|       |                |                    |                                                                                                      |                            |            |
|       | FB             |                    | Sitting on a plastic chair and watching the activities of the house                                  |                            |            |
| 9:50  | BB             |                    | Sitting near brother while he eats, playing with rope                                                |                            |            |
|       | W1             | BB3                | Sitting on a stool in front of her room and talking to the boy to finish eating and go hawking hochi |                            |            |
|       | FB             |                    | Sitting on a plastic chair and watching then household                                               |                            |            |
|       | MB             |                    | Draining the pots and big sieves she washed                                                          |                            |            |
|       | DL             |                    | Making necklace with beads and thin rope                                                             |                            |            |
| 9:55  | BG1            |                    | Eating tuwo and miyan kadi sitting on a stool                                                        | Tuwon maize and miyan kadi |            |
|       | W1             |                    | Sitting on a stool in front of her house                                                             |                            |            |
|       | FB             |                    | Sitting on a plastic chair and watching the activities in the house                                  |                            |            |
| 10:00 | BB1            |                    | Standing near the father and playing with handsets                                                   |                            |            |
|       | BG1            |                    | Still eating tuwo and miyan kadi                                                                     |                            |            |
|       | MB             |                    | Arranging the hochi in a big transparent polythene bag                                               |                            |            |
|       | BB2            |                    | Packing fruit from the floor and putting them in a bowl                                              |                            |            |
|       | BB1            |                    | Playing with a used rubber bowl of soup                                                              |                            |            |
| 10:05 | BB             |                    | Standing and playing with handset and started stooling                                               |                            |            |
|       | MB             |                    | The mother is removing the pant and sitting him on a plastic stool bowl while she                    |                            |            |

| TIME  | ACTOR INITIALS | RECIPIENT INITIALS | WHAT HAPPENED                                                                                                                                          | FOOD         | Reactivity |
|-------|----------------|--------------------|--------------------------------------------------------------------------------------------------------------------------------------------------------|--------------|------------|
|       |                |                    | scolds the child                                                                                                                                       |              |            |
|       | W1             |                    | Counting the hochi that would take for hawking                                                                                                         |              |            |
|       | DL             |                    | Still making bead for necklace                                                                                                                         |              |            |
|       | W2             |                    | Sitting in front of her room and fixing lalle                                                                                                          |              |            |
| 10:10 | BB             |                    | Sitting on a plastic stooling pan and drinking kunun millet in a cup                                                                                   | Kunun millet |            |
|       | MB             |                    | Using spoon to remove the hochi from the clay pans and bowls                                                                                           |              |            |
|       | BB1            |                    | Sitting close to the father and playing with hand set                                                                                                  |              |            |
|       | BB3            |                    | Carrying the basin of hochi and crying because he doesn't want to go                                                                                   |              |            |
|       | DL             |                    | Making bead for necklace                                                                                                                               |              |            |
|       | W2             |                    | Sitting in front of her room and fixing lalle                                                                                                          |              |            |
| 10:15 | MB             | BB                 | Carrying a kettle of water and the plastic stooling bowl to one corner of the house while the baby follows her to wash and clean him up after stooling |              |            |
|       | DL&W1          |                    | Buying/pricing wrappers, shoes, veils etc from a hawker who came to the house to sell                                                                  |              |            |
|       | W2             |                    | Still sitting in front of her room and fixing lalle                                                                                                    |              |            |
|       | FB             |                    | Sitting on a plastic chair and talking to the children                                                                                                 |              |            |
|       | BB2&BG2        |                    | Playing and beating each other together                                                                                                                |              |            |
|       | BB4            |                    | Crying because he was not allowed to play                                                                                                              |              |            |
| 10:20 | BB2&BG2        |                    | Beating each other while the father scolds                                                                                                             |              |            |



| TIME  | ACTOR INITIALS | RECIPIENT INITIALS | WHAT HAPPENED                                                                        | FOOD        | Reactivity |
|-------|----------------|--------------------|--------------------------------------------------------------------------------------|-------------|------------|
|       | BB             |                    | Sitting and playing with locally mad hand fan                                        |             |            |
|       | MB             |                    | Still removing the hochi from clay pans using spoon                                  |             |            |
|       | W1&DL          | BB4                | Sitting and looking at the hawkers clothes and veils while she breast feed her child | Breast milk |            |
| 10:25 | BB             |                    | Playing with step mother's handset                                                   |             |            |
|       | W1&DL          |                    | Sitting and still checking the clothes and shoes while she breast feed her baby      | Breast milk |            |
|       | MB             | BG1                | Carrying a basin of hochi and placing it on her head for hawking                     |             |            |
|       | FB             |                    | Sitting on a plastic chair and watches everyone in the house                         |             |            |

|       |     |     |                                                                                                                                                                                       |       |  |
|-------|-----|-----|---------------------------------------------------------------------------------------------------------------------------------------------------------------------------------------|-------|--|
| 10:30 | BB  |     | Crying and following the mother as she packs her bowls and plates from the basket where rained them in her apartment Carrying a basin of hochi and placing it on her head for hawking |       |  |
|       | BB1 | BB4 | Playing with empty carton of sphagetti                                                                                                                                                |       |  |
| 10:35 | BB  |     | Still crying and following the mother as she enters her room                                                                                                                          |       |  |
|       | BB  |     | Playing with an empty bottle of yoghurt in the room                                                                                                                                   |       |  |
|       | MB  |     | Arranges her dishes, bowls and plates on the cabinet                                                                                                                                  |       |  |
| 10:40 | MB  |     | Still arranging her things on the cabinet                                                                                                                                             |       |  |
|       | BB  |     | Playing with her brush on a cane bed and crying                                                                                                                                       |       |  |
|       | FB  |     | Entering the room and asking the mother for his cap                                                                                                                                   |       |  |
| 10:45 | MB  | BB  | Sitting on a mat in front of her                                                                                                                                                      | Kunun |  |

|       |     |     |                                                                                                                                                                            |        |  |
|-------|-----|-----|----------------------------------------------------------------------------------------------------------------------------------------------------------------------------|--------|--|
|       |     |     | room and feeding the child kunu in a cup mixed with a sachet of MNP<br>The kunu is cold and its semi solid, the child doesn't want to take but she forced her to finish it | millet |  |
|       | BG2 |     | Eating tuwon maize and miyan kadi                                                                                                                                          |        |  |
| 10:50 | MB  | BB  | Still forcing the child to finish the kunu.                                                                                                                                |        |  |
|       | BG2 |     | Asking the mother of more tuwo but she gave the remaining kunu with MNP while saying finish the tsakin kunu since the child doesn't take the tsaki                         |        |  |
| 10:55 | MB  |     | Sweeping her room again                                                                                                                                                    |        |  |
|       | BB  |     | Playing with the cane bed                                                                                                                                                  |        |  |
| 11:00 | MB  |     | Sweeping the frontage of her room                                                                                                                                          |        |  |
|       | BB  |     | Playing with stick and hair brush on the cane bed                                                                                                                          |        |  |
| 11:05 | BB  |     | Crying on falling down from the bed                                                                                                                                        |        |  |
|       | MB  | BB  | The mother raising him and wiping his tears                                                                                                                                |        |  |
| 11:10 | MB  |     | Still sweeping the compound of her apartment                                                                                                                               |        |  |
|       | BB  | BB  | Sitting on a plastic chair in front of the child mother's room and carrying the child on his laps while he plays with handset                                              |        |  |
| 11:15 | FB  | BB  | Sitting on a plastic chair in front of the child's mother's room and carrying the child on her laps                                                                        |        |  |
|       |     | BG2 | Sitting on a small stool                                                                                                                                                   |        |  |
|       |     | MB  | Carrying a basin of water                                                                                                                                                  |        |  |
| 11:20 | MB  | BB  | Bathing the child while the child is crying and the sister is telling him to stop crying                                                                                   |        |  |

|       |    |         |                                                                                                                                                       |  |  |
|-------|----|---------|-------------------------------------------------------------------------------------------------------------------------------------------------------|--|--|
| 11:25 | MB | BB      | Backing the child and removing the daughters pant and vest                                                                                            |  |  |
| 11:30 | MB | BB      | Backing the child and bathing the daughter                                                                                                            |  |  |
| 11:35 | MB | BB      | Still backing the child and bathing then baby                                                                                                         |  |  |
|       | FB |         | Sitting and listening to radio                                                                                                                        |  |  |
| 11:40 | MB | BG2     | Wearing clothes for her while she is still backing the child and sitting on a cane bed                                                                |  |  |
| 11:45 | MB | BB      | Backing the child and washing the children's shoes                                                                                                    |  |  |
| 11:50 | MB | BB1,BG2 | Sitting on a stool carrying the child on her laps and rubbing Vaseline for the daughter in front of her room                                          |  |  |
| 11:55 | MB | BB      | Sitting on a stool and rubbing Vaseline on his body on her laps                                                                                       |  |  |
| 12:00 | MB | BB      | Cutting his finger nails while he sleeps on her laps                                                                                                  |  |  |
| 12:05 | MB | BB      | Cutting his toe nails while he sleeps on her laps                                                                                                     |  |  |
| 12:10 | MB | BB      | Sitting on a stool and carrying the child on her laps while he sleeps                                                                                 |  |  |
| 12:15 | MB | BB      | Sitting on a stool and carrying the child on her laps while he sleeps                                                                                 |  |  |
| 12:20 | MB | BB      | Sitting on a stool and carrying the child on her laps while he sleeps                                                                                 |  |  |
| 12:25 | MB | BB      | Still Sitting on a stool and carrying the child on her laps while he sleeps                                                                           |  |  |
| 12:30 | MB | BB      | Still Sitting on a stool and carrying the child on her laps while he sleeps and gisting with the daughter inlaw in front of her room in her apartment |  |  |
| 12:35 | MB | BB      | Still carrying the child on her laps in her apartment                                                                                                 |  |  |
| 12:40 | MB | BB      | Still carrying the child on her laps in her apartment                                                                                                 |  |  |
| 12:45 | MB | BB      | Still carrying the child on her laps in her apartment                                                                                                 |  |  |

|       |             |    |                                                                                                              |       |  |
|-------|-------------|----|--------------------------------------------------------------------------------------------------------------|-------|--|
| 12:50 | MB          | BB | Still carrying the child on her laps in her apartment                                                        |       |  |
| 12:55 | MB          | BB | The child is still sleeping on his mother's leg in her apartment                                             |       |  |
| 1:00  | MB          | BB | The child is still sleeping on his mother's leg in her apartment                                             |       |  |
| 1:05  | MB          | BB | The child is still sleeping on his mother's leg in her apartment                                             |       |  |
| 1:10  | MB          | BB | The child is still sleeping on his mother's leg in her apartment                                             |       |  |
| 1:15  | MB          | BB | The child is still sleeping on his mother's leg in her apartment                                             |       |  |
| 1:20  | MB          | BB | The child is still sleeping on his mother's leg in her apartment                                             |       |  |
| 1:25  | MB          | BB | The child is still sleeping on his mother's leg in her apartment                                             |       |  |
| 1:30  | MB          | BB | Still carrying the child on her laps while he sleeps and selling shea butter to a girl from the neighborhood |       |  |
|       | BB1,BB2&BG2 |    | I could see the children on the 'kade' fruit tree from the mother's apartment while sitting on a stool       |       |  |
|       | MB          | BB | Still carrying the child on her laps while he sleeps                                                         |       |  |
|       | BG4         |    | Standing beside the mother and crying                                                                        |       |  |
|       | BB4         |    | Coming into the apartment with a cup                                                                         |       |  |
| 1:35  | MB          | BB | Still carrying the child on her laps while he sleeps                                                         |       |  |
|       | BG2         |    | Still standing beside the mother and dragging her clothes                                                    |       |  |
| 1:40  | MB          | BB | He is still sleeping on his mother's laps                                                                    |       |  |
| 1:45  | BB          |    | Crying on a stool as he just woke up                                                                         |       |  |
|       | DL          |    | Coming to apartment, carried the child and is giving him water to drink                                      | Water |  |
|       | MB          |    | Also coming into the apartment with a bowl of kunu and the                                                   |       |  |

|      |         |     |                                                                                  |            |                                                         |
|------|---------|-----|----------------------------------------------------------------------------------|------------|---------------------------------------------------------|
|      |         |     | daughter is following her about crying                                           |            |                                                         |
| 1:50 | BB      | BB  | Feeding herself kunun sorghum                                                    | Kunun dawa |                                                         |
| 1:55 | BB      | BB  | Feeding herself kunun sorghum in the compound of the house outside the apartment |            |                                                         |
| 2:00 | BB      | BB  | Drinking kunu and crying                                                         |            |                                                         |
|      | MB      |     | Carried the child on her laps and started feeding the child with kunu            | Kunun dawa |                                                         |
| 2:05 | BB      |     | Crying and following the mother around the house                                 |            |                                                         |
|      | MB      |     | She is carrying a kettle of water for the husband's ablution                     |            |                                                         |
|      | W1      |     | Fetching water from the well                                                     |            |                                                         |
|      | BB4     | BB  | Playing with stick and hitting the child                                         |            |                                                         |
|      | DL      |     | Sweeping another corner of the house where the children ate kade fruit           |            |                                                         |
|      | BB      |     | Still crying and shouting at the mother for food                                 |            |                                                         |
|      | BB4     |     | Touching my bag and my veil                                                      |            | Because he would not have done that if I was not around |
|      | BG2,BG3 |     | Drinking kunu together from the same bowl                                        |            |                                                         |
|      | W2      |     | Performing ablution under the tree                                               |            |                                                         |
|      | MB      |     | Cutting tuwon masara into small balls and adding fried shea butter oil and salt  |            |                                                         |
| 2:10 | BB      | BB  | Eating tuwon masara and shea butter oil with salt                                |            |                                                         |
|      | BB4     | BB4 | Drinking kunun sorghum on the floor                                              |            |                                                         |
|      | BG2&BG3 |     | Eating kade fruit                                                                |            |                                                         |

|      |         |              |                                                                                                                                                                                                                                                                                                                 |             |  |
|------|---------|--------------|-----------------------------------------------------------------------------------------------------------------------------------------------------------------------------------------------------------------------------------------------------------------------------------------------------------------|-------------|--|
|      | DL      |              | Mixing freshly prepared shea butter oil for cooking                                                                                                                                                                                                                                                             |             |  |
|      | W1      |              | Sitting on a stool and also mixing freshly prepared shea butter which was prepared yesterday from the shea butter nut after it has been grinded in a grinding machine and made into a semi solid paste and put in a pot on fire where it is allowed to cook until fractionation occurs and the oil is extracted |             |  |
| 2:15 | W1      | BB4          | Breastfeeding the child                                                                                                                                                                                                                                                                                         | Breast milk |  |
|      | BB      | BB           | Eating tuwon masara and shea butter oil mixed with salt                                                                                                                                                                                                                                                         |             |  |
|      | DL      |              | Mixing the processed shea butter used for cooking                                                                                                                                                                                                                                                               |             |  |
| 2:20 | BB      | BB           | Eating tuwon masara and shea butter oil mixed with salt                                                                                                                                                                                                                                                         |             |  |
|      | W1      |              | Mixing another portion of the processed shea butter                                                                                                                                                                                                                                                             |             |  |
| 2:25 | BB      | BB           | Still eating tuwon masara and shea butter oil mixed with salt                                                                                                                                                                                                                                                   |             |  |
|      | W1      |              | Cutting tuwo masara into small balls and breast feeding her baby because she is crying                                                                                                                                                                                                                          | Breast milk |  |
| 2:30 | W1      |              | Mixing the balls of tuwon masara with shea butter and salt                                                                                                                                                                                                                                                      |             |  |
|      | BB      |              | Drinking water from the water kettle                                                                                                                                                                                                                                                                            |             |  |
|      | MB      |              | Buying palm oil, pepper and magi from a girl who hawks them                                                                                                                                                                                                                                                     |             |  |
|      | BG2&BG3 |              | Still playing with sticks and nuts of the kade fruit                                                                                                                                                                                                                                                            |             |  |
| 2:35 | BB      |              | Standing and crying and calling on his mother who was in the bathroom                                                                                                                                                                                                                                           |             |  |
|      | W1      | BB4, BG3&BG2 | Giving the children tuwon masara and shea butter oil which she referred to as 'tantu'                                                                                                                                                                                                                           | Tantu       |  |
|      | BB1     |              | Eating 'tantu' seperately                                                                                                                                                                                                                                                                                       | Tantu       |  |

|      |                 |     |                                                                                              |             |  |
|------|-----------------|-----|----------------------------------------------------------------------------------------------|-------------|--|
| 2:40 | BB              |     | Still crying and shouting as mother gave him a smack with her hand and continued feeding him |             |  |
|      | BB4,<br>BG3&BG2 |     | Still eating 'tantu' together                                                                |             |  |
|      | W1              |     | Carrying a basin with sieve and sack of grain flour                                          |             |  |
| 2:45 | MB              | BB  | Still feeding the child tantu although he is still crying                                    |             |  |
|      | W1              |     | Sieving the maize flour                                                                      |             |  |
|      | BB4,BG3,BG2     |     | Still eating tantu together                                                                  |             |  |
| 2:50 | MB              | BB  | Giving the child water from a rubber kettle                                                  | Water       |  |
|      | W1              | BB4 | Sitting on a stool and breastfeeding her child while sieving the maize flour                 | Breast milk |  |
| 3:05 | BB              |     | Still crying and calling mother's name                                                       |             |  |
|      | MB              |     | Sitting beside the child and giving him water                                                | water       |  |
| 3:10 | W1              | BB4 | Still breastfeeding and sieving the maize flour                                              | Breast milk |  |
|      | BG3             |     | Lying down on the pavement and playing                                                       |             |  |
|      | BG2             |     | Drinking water                                                                               |             |  |
|      | BB              |     | Still crying and eating 'tantu' again                                                        |             |  |
| 3:15 | BB              |     | Playing with the food and throwing some on the floor                                         |             |  |
|      | W1              |     | Backing the child and sieving maize flour                                                    |             |  |
|      | BG2&BG3         |     | Playing together                                                                             |             |  |
| 3:20 | MB              |     | Sitting beside the child as he plays with stick and mother's wrapper                         |             |  |
|      | W1              | BB4 | Backing the child and sprinkling water on the sieved maize flour                             |             |  |
|      | BG2&BG3         |     | Playing with sand and small clay pot                                                         |             |  |

|      |         |     |                                                                                           |        |  |
|------|---------|-----|-------------------------------------------------------------------------------------------|--------|--|
| 3:25 | BB      |     | Playing with sand and the remaining tuwon masara                                          |        |  |
|      | W1      | BB4 | Backing her child and mixing the maize flour with water to form a thick paste             |        |  |
|      | MB      |     | Stirring semi solid millet paste kept under the sun by the daughter in-law in the morning |        |  |
|      | BG2&BG3 |     | Playing with sand and small clay pots                                                     |        |  |
| 3:30 | BB      |     | Crying and calling mother's name                                                          |        |  |
|      | MB      |     | Lying on a mat in another corner under the shade                                          |        |  |
|      | W1      | BB4 | Lying on the mat with her child                                                           |        |  |
| 3:40 | BB      |     | Lying down near the daughter in law on the mat and eating cooked tafasa                   | tafasa |  |
|      | MB      |     | Lying down on the mat                                                                     |        |  |
|      | W1      | BB4 | Lying on the mat with her child                                                           |        |  |
|      | BG2     |     | Practicing 'henna' decoration on her hands                                                |        |  |
| 3:45 | DL      | BB  | Happily playing with the child                                                            |        |  |
|      | MB      |     | Lying on the mat and taking a nap                                                         |        |  |
|      | W1      | BB4 | Lying on the mat and taking a nap                                                         |        |  |
| 3:50 | BB      |     | Lying near the daughter in-law and playing with her                                       |        |  |
|      | MB      |     | Sleeping on a mat                                                                         |        |  |
|      | W1      | BB4 | Sleeping on a mat with her child                                                          |        |  |
|      | BG2&BG3 |     | Mixing water and sand to form a ball                                                      |        |  |
| 3:55 | DL      | BB  | Carrying the child to then entrance of the house                                          |        |  |
|      | MB      |     | Still sleeping on the mat                                                                 |        |  |



|      |    |     |                                                                                |       |  |
|------|----|-----|--------------------------------------------------------------------------------|-------|--|
|      | W1 | BB4 | Still sleeping on the mat                                                      |       |  |
| 4:00 | DL | BB  | Still playing with the child                                                   |       |  |
|      | MB |     | Still sleeping on the mat                                                      |       |  |
|      | W1 | BB4 | Still sleeping on the mat                                                      |       |  |
| 4:05 | DL | BB  | Still playing with the child                                                   |       |  |
| 4:10 | DL | BB  | Still playing with the child                                                   |       |  |
|      | W1 | BB4 | Still sleeping on the mat                                                      |       |  |
| 4:15 | BB |     | Crying and beating the mother to wake up                                       |       |  |
|      | MB |     | Lying him closer                                                               |       |  |
|      | W1 | Bb4 | Still sleeping on the mat                                                      |       |  |
| 4:20 | BB |     | Lying with the child on the mat                                                |       |  |
|      | W1 | BB4 | Still sleeping on the mat                                                      |       |  |
| 4:25 | BB |     | Lying with mother on the mat and crying while the mother is still dozing off   |       |  |
| 4:30 | BB |     | Lying with the mother on the mat and hitting her with a small stick to wake up |       |  |
|      | W1 |     | Carrying a kettle of water to the bathroom                                     |       |  |
|      | W2 |     | Sitting on a stool                                                             |       |  |
| 4:35 | BB |     | Playing with dry battery cell while the mother is still lying on the mat       |       |  |
|      | W2 |     | Sweeping the frontage of her apartment                                         |       |  |
| 4:40 | FB |     | Entering the house with a bowl of waina                                        | waina |  |
|      | MB |     | Welcoming him and collecting the bowl                                          |       |  |

|      |       |     |                                                                                        |                |  |
|------|-------|-----|----------------------------------------------------------------------------------------|----------------|--|
|      | BB    |     | Crying and raising hands for the father to carry him                                   |                |  |
| 4:45 | BB    | BB  | Eating waina by himself                                                                | waina          |  |
|      | FB    |     | Sitting on a plastic chair under a shade                                               |                |  |
| 4:50 | BB    |     | Sitting on the floor and eating waina and drinking kunu                                | Waina and kunu |  |
| 4:55 | BB    |     | Sitting on the floor and eating waina and drinking kunu                                | Waina and kunu |  |
|      | MB    |     | Sitting beside the child as he eats                                                    |                |  |
|      | W1    |     | Performing ablution                                                                    |                |  |
| 5:00 | BB    |     | Sitting on the floor and eating waina and also playing with sticks                     | waina          |  |
|      | MB    |     | Sitting on the mat while the daughter is crying and asking for tuwo even without tantu |                |  |
| 5:05 | BG2   |     | Carrying a pot of remaining miyan kadi soup and eating with tuwo                       |                |  |
|      | BB    |     | Wearing his slippers                                                                   |                |  |
|      | MB    |     | Fetching water from the well                                                           |                |  |
| 5:10 | BB    |     | Sitting on his father's feet and playing with sand                                     |                |  |
|      | W1&DL |     | Sitting on the same mat                                                                |                |  |
| 5:15 | BB    | BB2 | Playing with brother who just entered the house                                        |                |  |
|      | MB    |     | Sweeping the cooking area to set fire                                                  |                |  |
| 5:20 | BB1   | BB  | Putting the child into a mortar used for pounding and the child smiles happily         |                |  |
|      | MB    |     | Carrying firewood to the kitchen to set fire                                           |                |  |
|      | W1    | BB4 | Breast feeding her baby                                                                | Breast milk    |  |
| 5:25 | BB    |     | Playing in the mortar                                                                  |                |  |

|      |          |     |                                                                                                                                                           |             |  |
|------|----------|-----|-----------------------------------------------------------------------------------------------------------------------------------------------------------|-------------|--|
|      |          |     |                                                                                                                                                           |             |  |
|      | MB       |     | Setting the fire                                                                                                                                          |             |  |
|      | W1       | BB4 | sitting on the floor and feeding the child                                                                                                                | Breast milk |  |
|      | DL&W2    |     | Sitting on the mat and gisitng                                                                                                                            |             |  |
| 5:30 | MB       |     | Adding more firewood to the ignited fire                                                                                                                  |             |  |
|      | BB       |     | Moving around and pushing an empty bucket like a car                                                                                                      |             |  |
|      | W1       | BB4 | Still breast feeding her child                                                                                                                            | Breast milk |  |
| 5:35 | MB       |     | Pouring water into the pot placed on fire                                                                                                                 |             |  |
|      | BB       |     | Still playing around                                                                                                                                      |             |  |
|      | W1,DL&W2 |     | Sitting on a mat and gisting with the husband/father in-law                                                                                               |             |  |
| 5:40 | MB       |     | Adding more water to the pot placed on fire                                                                                                               |             |  |
|      | BB       | BB4 | Playing with baby                                                                                                                                         |             |  |
|      | W1,DL&W2 |     | Still lying on a mat and gisting                                                                                                                          |             |  |
| 5:45 | MB       |     | Water is boiling on fire, making the millet paste prepared during the day more watery by adding small water and stirring with hand for it to mix properly |             |  |
|      | BB       |     | Eating cooked cow skin with other children                                                                                                                |             |  |
|      | W1,DL&W2 |     | Still lying on the mat and gisting                                                                                                                        |             |  |
| 5:50 | MB       |     | Washing maize with water                                                                                                                                  |             |  |
|      | BB       |     | Standing at the entrance of the house with the father and 3 other siblings                                                                                |             |  |
|      | MB       |     | Washing maize with water and draining in a sieve                                                                                                          |             |  |
| 5:55 |          |     | Pot of water is still boiling                                                                                                                             |             |  |

|      |                 |  |                                             |  |  |
|------|-----------------|--|---------------------------------------------|--|--|
|      | BB              |  | Standing in the house and doing nothing     |  |  |
| 6:00 | MB,<br>W1,DL&W2 |  | All sitting on the mat and gisting together |  |  |
|      |                 |  |                                             |  |  |

Primary Questions (Complete after you complete data collection):

From what you have seen observing THIS HOUSEHOLD, please answer the following questions in detail:

| Question                                                                                                                                                      | Write your <u>detailed</u> response here                                                                                                                                                                                                                                                                                                                                                                                                                                                                                                                                                                                                                                                                             |
|---------------------------------------------------------------------------------------------------------------------------------------------------------------|----------------------------------------------------------------------------------------------------------------------------------------------------------------------------------------------------------------------------------------------------------------------------------------------------------------------------------------------------------------------------------------------------------------------------------------------------------------------------------------------------------------------------------------------------------------------------------------------------------------------------------------------------------------------------------------------------------------------|
| <p>1. In this household, what would be the best way(s) to give nutritional supplements such as an MNP to young children to ensure compliance?</p> <p>Why?</p> | <p>It should be through the mother and father</p> <p>Because the mother is always with the child and she will make sure it is administered because during my stay for observation, she had mentioned improvement in the child's health since the therapy started; also the father also commented that he is in full support of the program. In fact, he asked me why only a child was given when there are two children of the required age group. So I had to explain the program will soon be scaled up and all children will have access to the MNP because I realized he loves the children very much. During my stay he really supported me and was checking on me, that is why I feel he also can be used.</p> |
| <p>2. In this household, who is favored during meal preparation or feeding?</p> <p>How is this favoritism expressed?</p>                                      | <p>All the children are favored in the household although, the two younger ones are mostly favored.</p> <p>If the child is eating, the mother always sits beside him or carries him on her laps or feeds him herself. Also, if anything is brought to the house, the two younger ones are fed before other children.</p>                                                                                                                                                                                                                                                                                                                                                                                             |

|                                                                                                                                                                |                                                                                                                                                                                                                                                                                                                                                                                                                                                                                                                                                                                         |
|----------------------------------------------------------------------------------------------------------------------------------------------------------------|-----------------------------------------------------------------------------------------------------------------------------------------------------------------------------------------------------------------------------------------------------------------------------------------------------------------------------------------------------------------------------------------------------------------------------------------------------------------------------------------------------------------------------------------------------------------------------------------|
| <p>3. How could we promote the MNP supplement for this family that would attract their attention?</p> <p>Who would they listen to?</p>                         | <p>The product should be given alongside incentives like bowls and spoons, or other eatables to improve their interest towards the product, although this household has high interest in the product. Also both caregivers should be given at the same time</p> <p>The caregivers would listen to their husbands. For the husband, he has good level of understanding so I don't think he needs to be linked to someone before listening.</p>                                                                                                                                           |
| <p>4. In this household, what would be the best ways to promote the MNP but limit how much it would be shared?</p> <p>Why?</p>                                 | <p>Proper sensitization and awareness on the usage and importance and effects should be clearly stated to the caregivers</p> <p>Because if they are properly sensitized and apprehend a good knowledge and understanding of the product, the sharing of the product will surely be limited. The family are really interested in the product and am sure they will abide by the rule of no sharing.</p>                                                                                                                                                                                  |
| <p>5. What other issues and concerns did you see with this family that are important for us to consider with regard to introduction of an MNP?</p> <p>Why?</p> | <p>Sharing is a major concern, although not directly sharing the MNP but the food. The mother gave the child kunu mixed with MNP and later gave her daughter the remaining one; assaying that there are small grains of the kunu based millet which the child doesn't finish all the time and that was why she gave the daughter.</p> <p>The temperature and consistency of kunu should be well described, infact it should be shown practically and let the care care givers feel the required temperature because they don't consider that as being important during preparation.</p> |

|                                                                                                                                                                                                                        |                                                                                                                                                                                                                                                    |
|------------------------------------------------------------------------------------------------------------------------------------------------------------------------------------------------------------------------|----------------------------------------------------------------------------------------------------------------------------------------------------------------------------------------------------------------------------------------------------|
| <p>6. Based on your experience observing this child today, do you believe reactivity negatively impacted your ability to see the food-related behaviors of the child?</p> <p>Please explain your answer in detail.</p> | <p>No, there was no impact of negative reactivity towards food related behaviors</p> <p>Because the child is allowed to eat without any obstruction by himself because he prefers eating on his own since he is still practicing to eat alone.</p> |
|------------------------------------------------------------------------------------------------------------------------------------------------------------------------------------------------------------------------|----------------------------------------------------------------------------------------------------------------------------------------------------------------------------------------------------------------------------------------------------|
