# Supplementary material for: Acceptance and compliance with micronutrient powder (MNP) among children aged 6–23 months in northern Nigeria
Source: PLOS journal article supplement (doi:10.1371/journal.pgph.0000961), 2022-10-17
Supplement: S8 (10.1371/journal.pgph.0000961.s008) [file journal.pgph.0000961.s008]

# SPOT CHECK RECORDING FORM

State: **KEBBI** LGA: **DANKO/WASAGU** Community: **HAYIN HARI**

Sex of index child: **M** Age of index child (in months): **12**

## Spot Check Information

1. Date of MNP distribution to household (circle option below based on LGA name above):

 **Kebbi:** BirninKebbi&Jega LGA: **June 16**

 **Kebbi:** Danko-wasagu: **June 17**

 **Adamawa:**Song, Ganye: **June 18**

 **Adamawa:**Guyuk **June 19**

2. Date of Spot Check Observation: **11<sup>TH</sup> JULY, 2015**\_

3. Number of sachets remaining(Ask the caregiver to show you and count the specific number of sachets remaining):

37

4. Number of sachets that should remainusing one MNP sachet per day (Analyst only):

37

5. Number of sachets remaining / number of sachets should be remaining(Analyst only):

37 / 37 = 100 %

## **Probes**

**Question 1.** You have **XX** MNP sachets remaining. Explain how easy or difficult it was to use the MNP product on a daily basis for your child 6 – 23 months? (Circle one answer)

**Very Difficult**

**Difficult**

**Easy**

**Very Easy**

**Question 2.** Describe any specific challenges that you faced that made the MNP difficult to use on a daily basis?

There was no challenge at all.

**Question 3.** Describe specific aspects of the MNP product that you or your child enjoyed that made it easier to use on a daily basis?

Because it has been keeping my child healthy, not until today that I observed that he is ill. It has been working well for him and that is what we enjoy.

**Question 4.** What questions do you have about the MNP based on your experience using it?  
I have no question at the moment.

**Question 5.** What specific recommendations do you have that we can do as a program to make the MNP easier to use on a daily basis?

My recommendation is that there should be medicine that my children will take.
