# Supplementary material for: Acceptance and compliance with micronutrient powder (MNP) among children aged 6–23 months in northern Nigeria
Source: PLOS journal article supplement (doi:10.1371/journal.pgph.0000961), 2022-10-17
Supplement: S8 (10.1371/journal.pgph.0000961.s008) [file journal.pgph.0000961.s008]

### 1.1.1 Instrument F –Direct Observation Form

#### <<Instrument F Direct Observation Form>>

**PI Name:** PragmaMathema,Stephen Kodish

**Study Title:** Formative research to develop an infant and young child feeding (IYCF) intervention with micronutrient powder (MNP) for children aged 6 – 23 months

**PI Version/Date:** Version1.0/January 24, 2015

Date: \_\_\_27<sup>TH</sup> JUNE, 2015\_\_\_\_\_ Location: \_\_\_\_\_PUROKUYO, GUYUK L.G.A\_\_\_\_\_

Data Collector: \_\_\_ANTIYA SANDA\_\_\_\_\_ Participant ID: \_A HOUSE NEAR A BAR\_\_\_

Main goals of this direct observation are to answer the following questions:

1. In this household, what would be the best way(s) to give nutritional supplements to young children? Why?
2. In this household, describe the food sharing that you observe throughout the meal. Are there any predictable patterns?
3. In this household, who is favored and how is this favoritism expressed during meal preparation and eating?

(TEAR OFF AT PERFORATED DOTTED LINE BELOW)

-----

PARTICIPANT ID: \_\_\_\_\_

Household Composition Table (Fill out as you do data collection)

| INITIALS | SEX<br>(M/F) | AGE<br>(estimated) | Relationship to<br>household | Description                                    |
|----------|--------------|--------------------|------------------------------|------------------------------------------------|
| YW       | F            | 25 YEARS           | WIFE                         | A YOUNG WOMAN WEARING A GREEN WRAPPER          |
| LB       | M            | 19 MONTHS          | SON                          | A LITTLE BABY                                  |
| TB       | M            | 17 YEARS           | NEIGHBOUR                    | A TALL BLACK BOY WEARING A PURPLE SHIRT        |
| SB       | M            | 13 YEARS           | RELATIVE                     | A SLIM YOUNG BOY WEARING A BLUE SHIRT          |
| SG       | F            | 5 YEARS            | NEIGHBOUR                    | A SMALL GIRL WEARING A PURPLE DRESS            |
| FB       | M            | 35 YEARS           | HUSBAND                      | A FAT BLACK MAN WEARING A SHIRT AND A TROUSER. |

|  |  |  |  |  |
|--|--|--|--|--|
|  |  |  |  |  |
|  |  |  |  |  |
|  |  |  |  |  |
|  |  |  |  |  |
|  |  |  |  |  |
|  |  |  |  |  |
|  |  |  |  |  |
|  |  |  |  |  |
|  |  |  |  |  |

PARTICIPANT ID: \_\_\_\_\_

| TIME | ACTOR INITIALS | RECIPIENT INITIALS | WHAT HAPPENED                          | FOOD | Reactivity |
|------|----------------|--------------------|----------------------------------------|------|------------|
| 8:00 | YW             |                    | SWEEPING THE HOUSE                     |      |            |
| 8:05 | YW             |                    | SWEEPING THE HOUSE                     |      |            |
| 8:10 | YW             |                    | SWEEPING THE HOUSE                     |      |            |
| 8:15 | YW             |                    | SWEEPING THE HOUSE                     |      |            |
| 8:20 | YW             |                    | SWEEPING THE HOUSE                     |      |            |
| 8:25 | YW             |                    | IS GATHERING THE DIRTY PLATES TOGETHER |      |            |
| 8:30 | YW             |                    | FETCHES WATER INTO A BIG BOWL          |      |            |
| 8:35 | YW             |                    | STARTS WASHING PLATES                  |      |            |
| 8:40 | YW             |                    | IS WASHING DIRTY PLATES                |      |            |
| 8:45 | YW             |                    | FETCHES WATER IN A POT                 |      |            |

| TIME | ACTOR INITIALS | RECIPIENT INITIALS | WHAT HAPPENED                                                | FOOD                  | Reactivity |
|------|----------------|--------------------|--------------------------------------------------------------|-----------------------|------------|
| 8:50 | YW             |                    | STARTS MAKING FIRE                                           |                       |            |
| 8:55 | YW             |                    | PUTS POT ON THE FIRE                                         |                       |            |
| 9:00 | YW             |                    | BRINGS GUINEA CORN FLOUR                                     | GUINEA CORN           |            |
| 9:01 | YW             |                    | STARTS SIEVING GUINEA CORN FLOUR                             | GUINEA CORN           |            |
| 9:02 | YW             |                    | CONTINUES TO SIEVE                                           | GUINEA CORN           |            |
| 9:03 | YW             |                    | MIXES GUINEA CORN FLOUR WITH WATER                           | GUINEA CORN           |            |
| 9:04 | YW             |                    | POURS MIXTURE INTO THE HOT WATER ON THE FIRE                 | GUINEA CORN AND WATER |            |
| 9:05 | YW             |                    | STARTS STIRRING THE MIXTURE ON THE FIRE                      | GUINEA CORN AND WATER |            |
| 9:06 | YW             |                    | COVERS THE POT                                               |                       |            |
| 9:07 | YW             | LB                 | BRINGS HER SON FROM THE ROOM                                 |                       |            |
| 9:08 | YW             | LB                 | KEEPS HER CHILD ON THE MAT                                   |                       |            |
| 9:10 | YW             |                    | OPENS THE POT ON THE FIRE TO FETCH THE KUNU                  | GUINEA CORN           |            |
| 9:11 | YW             |                    | FETCHES KUNU IN A CUP                                        | GUINEA CORN           |            |
| 9:12 | YW             |                    | BRINGS A SPOON                                               |                       |            |
| 9:13 | YW             |                    | USES THE SPOON TO MAKE THE KUNU COLD                         | GUINEA CORN           |            |
| 9:14 | YW             |                    | BRINGS DOWN THE POT ON THE FIRE                              |                       |            |
| 9:15 | YW             |                    | BRINGS THE CUP OF KUNU AND SPOON AND KEEPS IT NEAR HER CHILD |                       |            |
| 9:20 | YK             |                    | SITS AND ALLOWS THE KUNU TO GET COLD                         |                       |            |
| 9:25 | YW             |                    | GOES TO THE ROOM TO BRING THE MNP SATCHET                    |                       |            |

| TIME  | ACTOR INITIALS | RECIPIENT INITIALS | WHAT HAPPENED                                                    | FOOD                | Reactivity |
|-------|----------------|--------------------|------------------------------------------------------------------|---------------------|------------|
| 9:30  | YW             | LB                 | BROUGHT A SATCHET OF MNP                                         | MNP                 |            |
| 9:35  | YW             | LB                 | IS USING HER TEETH TO UNSEAL THE MNP SATCHET                     | MNP                 |            |
| 9:40  | YW             |                    | POURS ALL THE CONTENT OF THE MNP SATCHET INTO THE CUP OF KUNU    |                     |            |
| 9:45  | YW             |                    | STARTS MIXING THE MNP AND KUNU TOGETHER                          | MNP AND GUINEA CORN |            |
| 9:50  | YW             | LB                 | CARRYS HER CHILD ON THE LAP                                      |                     |            |
| 9:55  | YW             | LB                 | STARTS FEEDING HER CHILD                                         |                     |            |
| 10:00 | YW             | LB                 | CHECKS THE CONTENT ON THE CUP TO SEE IF THE MNP HAS BLENDED WELL |                     |            |
| 10:00 | YW             | LB                 | IS FEEDING HER CHILD WITH THE MNP MIXED WITH KUNU                | MNP AND GUINEA CORN |            |
| 10:05 | YW             | LB                 | FEEDING HER CHILD WITH MNP AND KUNU                              |                     |            |
| 10:06 | YW             | LB                 | GIVES HER CHILD THE LAST SPOON                                   |                     |            |
| 10:07 | YW             |                    | CHECKS THE CUP AND REALIZE IT IS EMPTY                           |                     |            |
| 10:08 | YW             |                    | HAS DRANK ALL THE KUNU MIXED WITH THE MNP                        |                     |            |
| 10:09 | LB             |                    | IS USING HIS TONGUE TO LICK HIS MOUTH                            |                     |            |
| 10:10 | YW             |                    | CARRYS EMPTY CUP TO WASH                                         |                     |            |
| 10:15 | YW             |                    | IS WASHING THE CUP AND SPOON                                     |                     |            |
| 10:20 | YW             | LB                 | COMES TO CLEAN THE BODY OF HER CHILD USING A RAG                 |                     |            |
| 10:25 | LB             |                    | IS PLAYING ON THE MAT                                            |                     |            |
| 10:30 | LB             |                    | IS PLAYING                                                       |                     |            |
| 10:35 | LB             |                    | IS SITTING ON THE MAT AND                                        |                     |            |

| TIME  | ACTOR INITIALS | RECIPIENT INITIALS | WHAT HAPPENED                                      | FOOD | Reactivity |
|-------|----------------|--------------------|----------------------------------------------------|------|------------|
|       |                |                    | PLAYING                                            |      |            |
| 10:40 | LB             |                    | IS PLAYING                                         |      |            |
| 10:45 | LB             |                    | IS PLAYING                                         |      |            |
| 10:50 | LB             |                    | IS PALYING                                         |      |            |
| 10:55 | LB             |                    | IS PLAYING                                         |      |            |
| 11:00 | YW             | LB                 | CARRYS HER CHILD ON THE BACK                       |      |            |
| 11:05 | LB             |                    | STARTS SLEEPING AT THE BACK OF HIS MOTHER          |      |            |
| 11:10 | YW             | LB                 | LAYS HER CHILD ON THE MAT                          |      |            |
| 11:15 | LB             |                    | IS SLEEPING                                        |      |            |
| 11:20 | LB             |                    | IS SLEEPING                                        |      |            |
| 11:25 | LB             |                    | IS SLEEPING                                        |      |            |
| 11:30 | LB             |                    | IS SLEEPING                                        |      |            |
| 11:35 | LB             |                    | IS SLEEPING                                        |      |            |
| 11:40 | LB             |                    | IS SLEEPING                                        |      |            |
| 11:45 | LB             |                    | IS SLEEPING                                        |      |            |
| 11:50 | LB             |                    | IS SLEEPING                                        |      |            |
| 11:55 | LB             |                    | IS SLEEPING                                        |      |            |
| 12:00 | YW             |                    | BRINGS SOME DIRTY CLOTHES TO WASH                  |      |            |
| 12:05 | YW             |                    | FETCHES WATER IN A BUCKET                          |      |            |
| 12:10 | YW             |                    | STARTS WASHING THE DIRTY CLOTHES USING A DETERGENT |      |            |
| 12:15 | YW             |                    | IS WASHING SOME DIRTY CLOTHES                      |      |            |
| 12:20 | YW             |                    | IS WASHING DIRTY CLOTHES                           |      |            |

| TIME  | ACTOR INITIALS | RECIPIENT INITIALS | WHAT HAPPENED                                       | FOOD  | Reactivity |
|-------|----------------|--------------------|-----------------------------------------------------|-------|------------|
|       |                |                    |                                                     |       |            |
| 12:25 | YW             |                    | IS WASHING DIRTY CLOTHES                            |       |            |
| 12:30 | YW             |                    | IS WASHING DIRTY CLOTHES                            |       |            |
| 12:35 | YW             |                    | IS WASHING DIRTY CLOTHES                            |       |            |
| 12:40 | YW             |                    | STARTS RINSING THE CLOTHES                          |       |            |
| 12:45 | YW             | LB                 | CARRYS HER CHILD FROM THE ROOM                      |       |            |
| 12:50 | YW             | LB                 | GIVES HER CHILD WATER TO DRINK                      | WATER |            |
| 12:55 | LB             |                    | STARTS CRYING AFTER DRINKING THE WATER              |       |            |
| 1:00  | YW             | LB                 | CARRYS HER CHILD ON THE BACK                        |       |            |
| 1:05  | YW             | LB                 | FETCHES WATER IN A BUCKET                           |       |            |
| 1:10  | YW             | LB                 | BRINGS HER CHILD DOWN AND BEGINS TO BATH HIM        |       |            |
| 1:15  | YW             | LB                 | IS BATHING HER CHILD                                |       |            |
| 1:20  | YW             | LB                 | IS BATHING HER CHILD                                |       |            |
| 1:25  | YW             | LB                 | CLEANS HER CHILDS BODY USING A TOWEL                |       |            |
| 1:30  | YW             | LB                 | STARTS APPLYING BODY CREAM ON THE BODY OF HER CHILD |       |            |
| 1:35  | YW             | LB                 | IS APPLYING CREAM ON HER CHILDS BODY                |       |            |
| 1:40  | YW             | LB                 | IS WEARING HER CHILD CLOTHES                        |       |            |
| 1:45  | YW             | LB                 | IS WEARING HER CHILD SOME CLOTHES                   |       |            |
| 1:50  | LB, SG         |                    | ARE PLAYING TOGETHER                                |       |            |
| 1:55  | LB, SG         |                    | ARE PLAYING TOGETHER                                |       |            |
| 2:00  | FB             |                    | COMES INTO THE HOUSE TO PICK SOMETHING AND LEAVES   |       |            |

| TIME | ACTOR INITIALS | RECIPIENT INITIALS | WHAT HAPPENED                                                            | FOOD          | Reactivity |
|------|----------------|--------------------|--------------------------------------------------------------------------|---------------|------------|
|      |                |                    | IMMEDIATELY                                                              |               |            |
| 2:05 | LB, SG         |                    | ARE PLAYING TOGETHER                                                     |               |            |
| 2:10 | SG             |                    | FETCHES WATER IN A CUP                                                   |               |            |
| 2:15 | SG             | LB                 | GIVES WATER TO THE BABY TO DRINK                                         |               |            |
| 2:20 | LB             |                    | IS DRINKING WATER                                                        | WATER         |            |
| 2:25 | YW             | LB                 | GIVES HIM KUNUN ZAKI TO DRINK THAT SHE BROUGHT FROM THE NEIGHBOURS HOUSE |               |            |
| 2:30 | LB             |                    | IS DRINKING HIS KUNU IN A CUP                                            | GUINEA CORN   |            |
| 2:35 | LB             |                    | IS DRINKING HIS KUNU                                                     | GUINEA CORN   |            |
| 2:40 | LB             |                    | IS DRINKING KUNU AND PLAYING                                             | GUINEA CORN   |            |
| 2:45 | YW             |                    | UNTIE THE BEANS PUDDING SHE BROUGHT FROM THE NEIGHBOURS HOUSE            |               |            |
| 2:50 | YW             |                    | SERVES BEANS PUDDING IN A PLATE                                          |               |            |
| 2:55 | YW             | LB                 | STATRTS HAND FEEDING HER CHILD WITH THE BEANS PUDDING                    | BEANS PUDDING |            |
| 3:00 | YW             | LB                 | FEEDING HER CHILD                                                        | BEANS PUDDING |            |
| 3:05 | YW             | LB                 | FEEDING HER CHILD                                                        | BEANS PUDDING |            |
| 3:10 | YW             | LB                 | GIVES HER CHILD WATER TO DRINK                                           | WATER         |            |
| 3:15 | YW             | LB                 | IS GIVING HER CHILD WATER TO DRINK                                       | WATER         |            |
| 3:20 | YW             | LB                 | IS FEEDING HER CHILD WITH BEANS PUDDING                                  | BEANS PUDDING |            |
| 3:25 | LB             |                    | STARTS HAND FEEDING HIMSELF                                              | BEANS         |            |
| 3:30 | LB             |                    | TAKES A CUP OF WATER TO DRINK                                            | WATER         |            |
| 3:35 | LB             |                    | LAYS ON THE MAT                                                          |               |            |
| 3:40 | LB             |                    | STARTS SLEEPING                                                          |               |            |

| TIME | ACTOR INITIALS | RECIPIENT INITIALS | WHAT HAPPENED                               | FOOD  | Reactivity |
|------|----------------|--------------------|---------------------------------------------|-------|------------|
| 3:45 | LB             |                    | IS SLEEPING                                 |       |            |
| 3:50 | LB             |                    | IS SLEEPING                                 |       |            |
| 3:55 | LB             |                    | IS SLEEPING                                 |       |            |
| 4:00 | YW             |                    | FETCHES WATER IN A BUCKET TO BATH           |       |            |
| 4:05 | YW             |                    | GOES TO THE BATHROOM WITH A BUCKET          |       |            |
| 4:10 | LB             |                    | IS SLEEPING                                 |       |            |
| 4:15 | LB             |                    | IS SLEEPING                                 |       |            |
| 4:20 | LB             |                    | SLEEPING                                    |       |            |
| 4:25 | LB             |                    | SLEEPING                                    |       |            |
| 4:30 | LB             |                    | SLEEPING                                    |       |            |
| 4:35 | LB             |                    | SLEEPING                                    |       |            |
| 4:40 | LB             |                    | SLEEPING                                    |       |            |
| 4:45 | YW             |                    | COMES OUT OF THE BATHROOM AND ENTERS A ROOM |       |            |
| 4:45 | SB, LB         |                    | STARTS PLAYING TOGETHER ON THE MAT          |       |            |
| 4:50 | SB, LB         |                    | PLAYING TOGETHER                            |       |            |
| 4:55 | SB, LB         |                    | PLAYING TOGETHER                            |       |            |
| 5:00 | YW             |                    | COMES OUT OF THE ROOM AND SITS ON A CHAIR   |       |            |
| 5:05 | YW             |                    | IS SITTING ALONE                            |       |            |
| 5:05 | TB             |                    | WALKS INTO THE HOUSE                        |       |            |
| 5:10 | TB, YW         |                    | SITTING AND CHATTING TOGETHER               |       |            |
| 5:15 | TB, YW         |                    | ARE CHATTING TOGETHER                       |       |            |
| 5:20 | TB, YW         |                    | STILL CHATTING                              |       |            |
| 5:25 | SB, LB         |                    | PLAYING TOGETHER                            |       |            |
| 5:30 | SB, LB         |                    | PLAYING TOGETHER                            |       |            |
| 5:35 | LB             |                    | TAKES A CUP AND DRINK WATER                 | WATER |            |
| 5:40 | LB             |                    | IS DRINKING WATER                           | WATER |            |
| 5:45 | LB             |                    | IS PLAYING ALONE                            |       |            |
| 5:50 | YW             | LB                 | COMES AND CARRY HER CHILD ON THE LAP        |       |            |
| 5:55 | YW             | LB                 | IS CARRYING HER CHILD ON THE LAP            |       |            |
| 6:00 | YW             | LB                 | IS CARRYING HER CHILD ON THE LAP            |       |            |
|      |                |                    |                                             |       |            |
|      |                |                    |                                             |       |            |



[illegible]



[illegible]

[illegible]

[illegible]

[illegible]

[illegible]

[illegible]



[illegible]

[illegible]

[illegible]

[illegible]

|  |  |  |  |  |  |
|--|--|--|--|--|--|
|  |  |  |  |  |  |
|  |  |  |  |  |  |
|  |  |  |  |  |  |
|  |  |  |  |  |  |
|  |  |  |  |  |  |
|  |  |  |  |  |  |

PARTICIPANT ID: \_\_\_\_\_

Primary Questions (Complete after you complete data collection):

From what you have seen observing THIS HOUSEHOLD, please answer the following questions in detail:

| Question                                                                                                                                                      | Write your <u>detailed</u> response here                                                                                                                                                                                                                                                      |
|---------------------------------------------------------------------------------------------------------------------------------------------------------------|-----------------------------------------------------------------------------------------------------------------------------------------------------------------------------------------------------------------------------------------------------------------------------------------------|
| <p>1. In this household, what would be the best way(s) to give nutritional supplements such as an MNP to young children to ensure compliance?</p> <p>Why?</p> | <p>The best way to give the MNP would be in the morning, young children are used to drinking kunu in the morning</p> <p>The young child would not refuse kunu in the morning because he is introduced to kunu as a complimentary feeding since he was 6 months. He is already used to it.</p> |
| <p>2. In this household, who is favored during meal preparation or feeding?</p> <p>How is this favoritism expressed?</p>                                      | <p>There was no meal preparation in this household today, it was only kunu that was prepared for only the young child.</p> <p>I would say that the young child is favoured in a way that his kunu was the only food prepared in this household throughout the day.</p>                        |

|                                                                                                                                        |                                                                                                                                                                                                                                                                                                   |
|----------------------------------------------------------------------------------------------------------------------------------------|---------------------------------------------------------------------------------------------------------------------------------------------------------------------------------------------------------------------------------------------------------------------------------------------------|
|                                                                                                                                        |                                                                                                                                                                                                                                                                                                   |
| <p>3. How could we promote the MNP supplement for this family that would attract their attention?</p> <p>Who would they listen to?</p> | <p>It should be promoted through the mother because she stays at home all day unlike the dad who is rarely at home.</p> <p>This young child would listen to his mother because she knows how to put him and make him eat all his kunu and other food brought to them from the neighbors house</p> |
| <p>4. In this household, what would be the best ways to promote the MNP but limit how much it would be shared?</p> <p>Why?</p>         | <p>The best way to promote the MNP would be through the mother but the MNP in this household could be shared.</p> <p>because the mother shared food with her neighbor and the neighbor in return shared some already prepared foods with this household.</p>                                      |

|                                                                                                                                                                                                                        |                                                                                                                                                                                                                                                                                        |
|------------------------------------------------------------------------------------------------------------------------------------------------------------------------------------------------------------------------|----------------------------------------------------------------------------------------------------------------------------------------------------------------------------------------------------------------------------------------------------------------------------------------|
|                                                                                                                                                                                                                        |                                                                                                                                                                                                                                                                                        |
| <p>5. What other issues and concerns did you see with this family that are important for us to consider with regard to introduction of an MNP?</p> <p>Why?</p>                                                         | <p>It appears this house hold do not have food items or food stuff in reserve to use in preparing meals.</p> <p>No meal was prepared, no one could tell if they have sufficient guinea corn to use in preparing kunu for the young child in weeks to come or perhaps days to come.</p> |
| <p>6. Based on your experience observing this child today, do you believe reactivity negatively impacted your ability to see the food-related behaviors of the child?</p> <p>Please explain your answer in detail.</p> | <p>Not in any way</p> <p>There was no such thing as reactivity in this household today.</p>                                                                                                                                                                                            |
