# Supplementary material for: Acceptance and compliance with micronutrient powder (MNP) among children aged 6–23 months in northern Nigeria
Source: PLOS journal article supplement (doi:10.1371/journal.pgph.0000961), 2022-10-17
Supplement: S8 (10.1371/journal.pgph.0000961.s008) [file journal.pgph.0000961.s008]

## SPOT CHECK RECORDING FORM

State: Adamawa \_ LGA: \_Ganye\_\_\_\_\_ Community: \_Dadiri\_

Name of caregiver (female):.....Zainab Saleh.....

Name of caregiver (male): .....\_

Sex of index child: female\_ Age of index child (in months): 17 month\_\_\_\_\_

### Spot Check Information

1. Date of MNP distribution to household (circle option below based on LGA name above):

✚ **Kebbi:** BirninKebbi&Jega LGA: **June 16**

✚ **Kebbi:** Danko-wasagu: **June 17**

✚ **Adamawa:**Song, Ganye: **June 18**

✚ **Adamawa:**Guyuk **June 19**

2. Date of Spot Check Observation: \_\_\_\_08/07/2015\_\_\_\_\_

3. Number of sachets remaining(Ask the caregiver to show you and count the specific number of sachets remaining):

55

4. Number of sachets that should remainusing one MNP sachet per day (Analyst only):

41

5. Number of sachets remaining / number of sachets should be remaining(Analyst only):

\_55\_\_\_\_\_ / \_41\_\_\_\_\_ = \_\_\_\_134\_\_\_\_\_ %

## **Probes**

**Question 1.** You have **XX** MNP sachets remaining. Explain how easy or difficult it was to use the MNP product on a daily basis for your child 6 – 23 months? (Circle one answer)

**Very Difficult**

**Difficult**

**Easy**

**Very Easy**

**Question 2.** Describe any specific challenges that you faced that made the MNP difficult to use on a daily basis?

I have to use a razor blade to open the sachet.

Preparing kunu each day just to administer the MNP is that ok.

Can I still continue administering the MNP because my child is feeding better now

**Question 3.** Describe specific aspects of the MNP product that you or your child enjoyed that made it easier to use on a daily basis?

The taste was ok because my child did not reject it in the few days that I gave her

**Question 4.** What questions do you have about the MNP based on your experience using it?

Is diarrhoea a side effect of the MNP?

My child was vomiting breast milk after consuming MNP is that ok

Can I still continue administering the MNP? Because my child is feeling better now?

**Question 5.** What specific recommendations do you have that we can do as a program to make the MNP easier to use on a daily basis?

There should be no restrictions in the kind of food MNP will be added to
