# Supplementary material for: Acceptance and compliance with micronutrient powder (MNP) among children aged 6–23 months in northern Nigeria
Source: PLOS journal article supplement (doi:10.1371/journal.pgph.0000961), 2022-10-17
Supplement: S8 (10.1371/journal.pgph.0000961.s008) [file journal.pgph.0000961.s008]

### 1.1.1 Instrument F –Direct Observation Form

#### <<Instrument F Direct Observation Form>>

**PI Name:** PragmaMathema, Stephen Kodish

**Study Title:** Formative research to develop an infant and young child feeding (IYCF) intervention with micronutrient powder (MNP) for children aged 6 – 23 months

**PI Version/Date:** Version1.0/January 24, 2015

Date:18/06/2015 Location: Goru Chindo

Data Collector: Samira Usman

Main goals of this direct observation are to answer the following questions:

1. In this household, what would be the best way(s) to give nutritional supplements to young children? Why?
2. In this household, describe the food sharing that you observe throughout the meal. Are there any predictable patterns?
3. In this household, who is favored and how is this favoritism expressed during meal preparation and eating?

Household Composition Table (Fill out as you do data collection)

| INITIALS | SEX (M/F) | AGE (estimated) | Relationship to household                 | Description                                     |
|----------|-----------|-----------------|-------------------------------------------|-------------------------------------------------|
| MM       | F         | 20yrs           | Mother                                    | Red wrapper and pink tie with average height    |
| BBI      | M         | 5yrs            | Cousin brother living in the house        | Wearing brown trousers                          |
| BB2      | M         | 11 months       | Baby                                      | Green short                                     |
| BG       | F         | 2yrs            | Daughter                                  | Milk pant                                       |
| BG 2     | F         | 7yrs            | Cousin sister living in the same compound | Black gown and green cap                        |
| MI       | F         | 53yrs           | Mother in-law                             | Blue wrapper and head tie                       |
| WT       | F         | 31yrs           | Senior brothers wife                      | Red and blue wrapper, top and head tie (Ankara) |
| TM       | M         | 18yrs           | The son of a brothers wife (cousin)       | Black jeans and red short                       |

|    |   |       |               |                                      |
|----|---|-------|---------------|--------------------------------------|
| FI | M | 60yrs | Father in-law | Milk long gown, grey hair (jalabiya) |
|    |   |       |               |                                      |
|    |   |       |               |                                      |
|    |   |       |               |                                      |
|    |   |       |               |                                      |
|    |   |       |               |                                      |
|    |   |       |               |                                      |

| TIME  | ACTOR INITIALS | RECIPIENT INITIALS | WHAT HAPPENED                                      | FOOD                       | Reactivity |
|-------|----------------|--------------------|----------------------------------------------------|----------------------------|------------|
| 10:00 | MM             | BB2                | Giving the baby water in the silver cup            | water                      |            |
| 10:05 | BG             |                    | Eating tuwo rice with baobab leaves soup           | Tuwo and dried baobab soup |            |
| 10:15 | BB2            |                    | Crowing and playing alone                          |                            |            |
| 10:20 | BB1            |                    | PLAYING AROUND THE HOUSE                           |                            |            |
| 10:25 |                | Bb2                | Mother breastfeeding the baby                      |                            |            |
| 10:30 | BG             |                    | Playing around the house                           |                            |            |
| 10:35 | MM             |                    | Mother sweeping the house                          |                            |            |
| 10:40 | MM             | BG                 | Beating the baby girl to put on her pant           |                            | R          |
| 10:45 | MM             | BB2                | Baby crying and mother took him and give him water | water                      |            |
| 10:50 | MM             | BG                 | Mother combing the baby girl hair                  |                            |            |
| 10:55 | MM             |                    | Brother going out to the next house                |                            |            |

| TIME  | ACTOR INITIALS | RECIPIENT INITIALS | WHAT HAPPENED                                                                                                            | FOOD               | Reactivity |
|-------|----------------|--------------------|--------------------------------------------------------------------------------------------------------------------------|--------------------|------------|
| 11:00 | MM             | BB2                | Mother breast feeding the baby                                                                                           |                    |            |
| 11:05 | MM             | BB2                | Mother backing the baby                                                                                                  |                    |            |
| 11:10 | MM             |                    | Giving the remaining food to the goats in the house with the same bowl                                                   |                    |            |
| 11:15 | MM             | BB                 | Mother bringing out a mat and wrapper, lay the wrapper on the mat and then keep the baby, the baby is sleeping           |                    |            |
| 11:20 | MM             | BB2                | The baby is crying and the mother is breast feeding him lying down with him, so he slept again                           |                    |            |
| 11:25 | BB2            |                    | Still sleeping                                                                                                           |                    |            |
| 11:30 | MM             | BB2                | The baby woke up and starts crying and the mother took him and breast feed him                                           |                    |            |
| 11:35 | MM             | BB2                | Mother giving the baby pap in a small cup and add MNP powder he take small and leave the remaining                       | Pap made of millet | R          |
| 11:40 | MM             | BB2                | Mother playing with the baby                                                                                             |                    |            |
| 11:45 | MM             | BB2                | Mother breast feeding the baby                                                                                           |                    |            |
| 11:50 | MM             | BB2                | Mother giving the baby water                                                                                             |                    |            |
| 11:55 | BB2            | BB2, BG1           | Eating rice and as well giving the baby and the BG1                                                                      | Rice and oil       |            |
| 12:00 | BB2            |                    | Baby crawling and playing around                                                                                         |                    |            |
| 12:05 | MM             | BB2                | Baby is having diarrhea and the mother washing his body and pant and picking the one on the ground with broom and packer |                    |            |
| 12:10 | MM             |                    | Mother washing clothes                                                                                                   |                    |            |
| 12:15 | MM             | BB2                | Baby is crying and the mother took him and breast feed him                                                               |                    |            |

| TIME  | ACTOR INITIALS | RECIPIENT INITIALS | WHAT HAPPENED                                                                | FOOD | Reactivity |
|-------|----------------|--------------------|------------------------------------------------------------------------------|------|------------|
| 12:20 | BB2            |                    | Baby playing with plastic plate                                              |      |            |
| 12:25 | MM             | BB2                | Mother backing the baby because he is crying                                 |      |            |
| 12:30 | MM             |                    | Still washing clothes                                                        |      |            |
| 12:35 | MM             | BB2                | Mother keeping the baby down and he is playing                               |      |            |
| 12:40 | BG2            |                    | Fetching water from the tap outside the house                                |      |            |
| 12:45 | BG2            | BB2                | The girl carries the baby outside the house                                  |      |            |
| 12:50 | MM             | BB2                | The baby is crying and the mother took him from the girl and breast feed him |      |            |
| 12:55 | BB2            |                    | The baby is sleeping                                                         |      |            |
| 1:00  | MM             |                    | Washing clothes                                                              |      |            |
| 1:05  | BB2            |                    | The baby still sleeping                                                      |      |            |
| 1:10  | BB2            |                    | The baby still sleeping                                                      |      |            |
| 1:15  | BB2            |                    | The baby still sleeping                                                      |      |            |
| 1:20  | BB2            |                    | The baby still sleeping                                                      |      |            |
| 1:25  | BB2            |                    | The baby still sleeping                                                      |      |            |
| 1:30  | MM             | BB2                | Baby just wake up and starts crying and the mother took him and gave him pap | pap  |            |
| 1:35  | MM             | BB2                | Mother is breastfeeding the baby                                             |      |            |
| 1:40  | MM             | BB2                | Still breast feeding the baby                                                |      |            |
| 1:45  | Bb2            |                    | Baby is sleeping                                                             |      |            |
| 1:50  | BB2            |                    | Baby still sleeping                                                          |      |            |
| 1:55  | MM             |                    | Mother washing clothes                                                       |      |            |

| TIME | ACTOR INITIALS | RECIPIENT INITIALS | WHAT HAPPENED                                                                                                                                                   | FOOD | Reactivity |
|------|----------------|--------------------|-----------------------------------------------------------------------------------------------------------------------------------------------------------------|------|------------|
|      |                |                    |                                                                                                                                                                 |      |            |
| 2:00 | BB2            |                    | Still sleeping                                                                                                                                                  |      |            |
| 2:05 | BB2            |                    | Still sleeping                                                                                                                                                  |      |            |
| 2:10 | BB2            |                    | Sleeping                                                                                                                                                        |      |            |
| 2:15 |                |                    | Sleeping                                                                                                                                                        |      |            |
| 2:20 |                |                    | Sleeping                                                                                                                                                        |      |            |
| 2:25 | BG             |                    | The small girl is eating boiled kenaf giving to her by a woman next to their house                                                                              |      |            |
| 2:30 | BB2            |                    | Baby still sleeping                                                                                                                                             |      |            |
| 2:35 |                |                    | sleeping                                                                                                                                                        |      |            |
| 2:40 |                |                    | Sleeping                                                                                                                                                        |      |            |
| 2:45 | BB2            |                    | Sleeping                                                                                                                                                        |      |            |
| 2:50 | MM             | BG                 | Mother is bathing the small girl                                                                                                                                |      |            |
| 2:55 | MM             |                    | Mother carry a bucket of water and enter the toilet                                                                                                             |      |            |
| 3:00 | BB2            |                    | Baby still sleeping                                                                                                                                             |      |            |
| 3:05 | MM             | BB2                | Baby wakes up crying and the mother took him and bath him in a rubber, then give him water to drink in a cup; then the mother sat down and breast feed the baby |      |            |
| 3:10 |                |                    | Still breast feeding the baby                                                                                                                                   |      |            |
| 3:15 |                |                    | Breast feeding the baby                                                                                                                                         |      |            |
| 3:20 |                |                    | Baby playing around                                                                                                                                             |      |            |
| 3:25 | BB2            | MM                 | Baby crying and the mother brought kenaf (rama) for the child and he                                                                                            |      |            |

| TIME  | ACTOR INITIALS | RECIPIENT INITIALS | WHAT HAPPENED                                                                                         | FOOD | Reactivity |
|-------|----------------|--------------------|-------------------------------------------------------------------------------------------------------|------|------------|
|       |                |                    | refused to eat                                                                                        |      |            |
| 3:30  | MM             | BB2                | The baby is still crying, the mother feed him with pap in a cup and he drank all                      | pap  |            |
| 3:35  | BB2            |                    | Baby sitting on a mat scratching his body                                                             |      |            |
| 3:40  | BB2            |                    | Baby playing with his sister                                                                          |      |            |
| 3:45  | MM             | BB2                | Mother putting the baby on her lap with his leg open and he starts passing stool                      |      |            |
| 3:50  | MM             | BB2                | Mother washing the baby body and find sand and pack the stool on the ground                           |      |            |
| 3:55  | BG             |                    | Small girl sleeping in her ground mother in the compound                                              |      |            |
| 4: 00 | MM             | BB2                | Mother feeding the baby with white rice and oil                                                       |      |            |
| 4:05  | MM             | BB2                | Mother gives the baby water and then breast feed him                                                  |      |            |
| 4:10  | BB2            |                    | Baby playing with the rice in the bowl and picking those on the ground and eating                     |      |            |
| 4:15  | BB2, MM        | BB2                | Baby starts crawling and following the mother crying and she carried him sit down and breast feed him |      |            |
| 4:20  | MM             | BB2                | Mother sleeping and the baby is breast feeding                                                        |      |            |
| 4: 25 | BB2            |                    | Baby is playing                                                                                       |      |            |
| 4:30  | MM             | BB2                | Baby is crying and the mother lie down with the baby breast feeding him                               |      |            |
| 4:35  | BB2            |                    | Baby is sleeping                                                                                      |      |            |
| 4:40  | MM             | BB2                | Both the mother and the baby are sleeping, baby breast feeding                                        |      |            |
| 4:45  | BB2            |                    | Baby still sleeping                                                                                   |      |            |
| 4:50  | MM             | BB2                | Baby wakes up and the mother give him water                                                           |      |            |

| TIME | ACTOR INITIALS | RECIPIENT INITIALS | WHAT HAPPENED                                                                                                                                                                                                                      | FOOD  | Reactivity |
|------|----------------|--------------------|------------------------------------------------------------------------------------------------------------------------------------------------------------------------------------------------------------------------------------|-------|------------|
| 4:55 | BB2            |                    | Baby is playing on his mothers back                                                                                                                                                                                                |       |            |
| 5:00 | MM             | BB2                | Mother is lying down sleeping and the baby is breast feeding                                                                                                                                                                       |       |            |
| 5:05 | MM             | BB2                | Mother is breast feeding the baby and he is sleeping                                                                                                                                                                               |       |            |
| 5:10 | MM             | BB2                | Mother breast feeding the baby                                                                                                                                                                                                     |       |            |
| 5:15 | MM             | BB2                | Mother breast feeding the baby                                                                                                                                                                                                     |       |            |
| 5:20 |                |                    | Baby and mother still sleeping                                                                                                                                                                                                     |       |            |
| 5:25 |                |                    | Baby and mother still sleeping                                                                                                                                                                                                     |       |            |
| 5:30 |                |                    | Baby and mother still sleeping                                                                                                                                                                                                     |       |            |
| 5:35 | MM             | BG                 | Mother went into the room and bring pap to the girl in a cup and the girl is drinking it her self                                                                                                                                  | pap   |            |
| 5:40 | MM             | BG                 | Baby girl says she want to drink water and the mother give her the water                                                                                                                                                           |       |            |
| 5:45 | MM             |                    | Mother is setting fire                                                                                                                                                                                                             |       |            |
| 5:50 | MM             |                    | Washing the pot and then add water into the pot and set fire in the presence of her in-law                                                                                                                                         |       |            |
| 5:55 | MM             | BB2                | Baby wakes up and the mother gives him water and backs him. Mother set fire and add water in another pot, add palm oil and onions, tomatoes and pepper with grinded locust beans magi, salt, dried ginger and then closes the pot. | water |            |
| 6:00 | TM             |                    | Came in the house with a bike and took a jericen and went outside to fetch water 3 times emptying the water into a big pot                                                                                                         |       |            |
| 6:05 | MI             |                    | Mother in-law is preparing gruel with the boiling water that her daughter in-law put on the fire. She                                                                                                                              |       |            |

| TIME | ACTOR INITIALS | RECIPIENT INITIALS | WHAT HAPPENED                                                                                                                                       | FOOD  | Reactivity |
|------|----------------|--------------------|-----------------------------------------------------------------------------------------------------------------------------------------------------|-------|------------|
|      |                |                    | add the boiling water into the watery pastry, it turns into gruel. She add small quantity of cold water on top of the gruel and take it to her room |       |            |
| 6:15 | WT             |                    | The brother's wife wash the rice with water and add into the boiling pot and close it                                                               |       |            |
| 6:20 | MM             | BB2                | Mother keep the baby on the ground and give him water and the baby is still playing                                                                 | water |            |
| 6:25 | BB2            |                    | Baby still playing                                                                                                                                  |       |            |
| 6:30 | BG2            |                    | The 7 year old girl is cutting the vegetables in a calabash                                                                                         |       |            |
| 6:35 | BB2            |                    | Baby playing                                                                                                                                        |       |            |
| 6:40 | BG             | BB2                | A two year old girl is drinking pap and giving to her brother to drink                                                                              | Pap   |            |
| 6:45 | MM             | BB2                | Mother is playing with the baby                                                                                                                     |       |            |

|      |     |     |                                                                                                 |              |  |
|------|-----|-----|-------------------------------------------------------------------------------------------------|--------------|--|
| 6:50 | MM  | BB2 | Mother is breast feeding her baby                                                               |              |  |
| 6:55 | MM  | BB2 | Mother is backing the baby                                                                      |              |  |
| 7:00 | MM  | BB2 | Mother backing the baby                                                                         |              |  |
| 7:05 | BB2 |     | Baby is crying                                                                                  |              |  |
| 7:10 | MM  | BB2 | Mother bring him down to breast feed him                                                        |              |  |
| 7:20 | BG2 |     | The young girl washes the spinach with water and add into the pot and closes it                 | Spinach soup |  |
| 7:25 | WT  |     | The brother's wife is pounding the rice in the pot until it is very soft and she closes the pot | Tuwo rice    |  |
| 7:30 | WT  |     | She again open the pot and re open it again and serve to the members of the family              |              |  |



|      |          |        |                                                                                                                                                                                                                                                                                                                                                  |                            |                            |
|------|----------|--------|--------------------------------------------------------------------------------------------------------------------------------------------------------------------------------------------------------------------------------------------------------------------------------------------------------------------------------------------------|----------------------------|----------------------------|
| 7:35 | MM       | BB2    | Mother is backing the baby                                                                                                                                                                                                                                                                                                                       |                            |                            |
| 7:40 | BB2      |        | Baby sleeping on his mother back                                                                                                                                                                                                                                                                                                                 |                            |                            |
| 7:45 | WT       |        | The senior brother's wife is serving the food. The husband has his bowl, her children in one big bowl. Whoever wants to eat fetch from the bowl, she has her own bowl. Her brother's wife (mother of the baby ) has her own bowl with her children, her husband has his own bowl. Mother in law has her own bowl, father in law has his own bowl |                            | Tuwo rice and spinach soup |
| 7:50 | MM<br>BG | BB2    | The baby wakes up and the mother give him water and breast feed him and keep him on the ground playing with his sister                                                                                                                                                                                                                           |                            |                            |
| 7:55 | TM       |        | Older cousin brother came into the house and fetch food and went out with it                                                                                                                                                                                                                                                                     |                            |                            |
|      | BG2      |        | The young girl is eating a lone                                                                                                                                                                                                                                                                                                                  |                            |                            |
|      | BB1      |        | The young boy is eating alone                                                                                                                                                                                                                                                                                                                    |                            |                            |
|      | BG1      |        | The two yr old is eating alone                                                                                                                                                                                                                                                                                                                   |                            |                            |
|      | MI       |        | Mother inlaw is eating alone                                                                                                                                                                                                                                                                                                                     |                            |                            |
| 8:05 | MM       | BB2    | Baby is crying and mother is breast feeding the baby                                                                                                                                                                                                                                                                                             | Tuwo rice and spinach soup |                            |
| 8:10 | MM       | BB2 BG | Mother is eating and giving to her baby and 2 years old is eating with them again                                                                                                                                                                                                                                                                |                            |                            |

Primary Questions (Complete after you complete data collection):

From what you have seen observing THIS HOUSEHOLD, please answer the following questions in detail:

| Question                                                                                                                                                       | Write your <u>detailed</u> response here                                                                                                                                                                                                                                                                                                                                                                                                                                                                                                                                                                |
|----------------------------------------------------------------------------------------------------------------------------------------------------------------|---------------------------------------------------------------------------------------------------------------------------------------------------------------------------------------------------------------------------------------------------------------------------------------------------------------------------------------------------------------------------------------------------------------------------------------------------------------------------------------------------------------------------------------------------------------------------------------------------------|
| <p>1. In this household, what would be the best way(s) to give nutritional supplements such as an MNP to young children to ensure compliance?</p> <p>Why?</p>  | <p>The best way to give MNP in this household is through the mother because the mother is fully in-charge of taking care of the baby</p>                                                                                                                                                                                                                                                                                                                                                                                                                                                                |
| <p>2. In this household, who is favored during meal preparation or feeding?</p> <p>How is this favoritism expressed?</p>                                       | <p>The baby because he is always protected by his mother and she is eating he is on her lap and she is given him the food little by little</p>                                                                                                                                                                                                                                                                                                                                                                                                                                                          |
| <p>3. How could we promote the MNP supplement for this family that would attract their attention?</p> <p>Who would they listen to?</p>                         | <p>Through their husbands because the wife accepts and obey whatever her husband says i.e his decision is final</p> <p>Secondly, the in-law as I can see they so much respect them and obey their instruction</p>                                                                                                                                                                                                                                                                                                                                                                                       |
| <p>4. In this household, what would be the best ways to promote the MNP but limit how much it would be shared?</p> <p>Why?</p>                                 | <p>Through proper sensitization of the product to the caregivers because as I can see they do not have enough information about the product</p>                                                                                                                                                                                                                                                                                                                                                                                                                                                         |
| <p>5. What other issues and concerns did you see with this family that are important for us to consider with regard to introduction of an MNP?</p> <p>Why?</p> | <p>The issues and concern I saw with regards to this family that are important with regard to the introduction of MNP is the administration of MNP because when she put the MNP in the cup of pap the child could not finish it and she left it there, at long last the cup fell and the pap pour away, carelessness is my concern. Hygiene is also another concern, although the part of the house where I stood is to some extend clean but the compound in which animal are rear is close to where food is cooked, children passing stools and urinating wherever they want. The household is an</p> |

|                                                                                                                                                                                                                        |                                                                                                                                                                                                                                                                                                                                                                                                                                                                                                 |
|------------------------------------------------------------------------------------------------------------------------------------------------------------------------------------------------------------------------|-------------------------------------------------------------------------------------------------------------------------------------------------------------------------------------------------------------------------------------------------------------------------------------------------------------------------------------------------------------------------------------------------------------------------------------------------------------------------------------------------|
|                                                                                                                                                                                                                        | extended family                                                                                                                                                                                                                                                                                                                                                                                                                                                                                 |
| <p>6. Based on your experience observing this child today, do you believe reactivity negatively impacted your ability to see the food-related behaviors of the child?</p> <p>Please explain your answer in detail.</p> | <p>I do not think reactivity negatively impacted on my ability to see the food related behavior of the child because with time they even tend to forget about my presence and continue with their activities.</p> <p>My only concern is during the MNP administration, she was looking at me and facing me so that I can see that she is administering the MNP and even asking me about the product and I pretended I don't know what it is. I think maybe they were told about our coming.</p> |
