# Supplementary material for: Acceptance and compliance with micronutrient powder (MNP) among children aged 6–23 months in northern Nigeria
Source: PLOS journal article supplement (doi:10.1371/journal.pgph.0000961), 2022-10-17
Supplement: S8 (10.1371/journal.pgph.0000961.s008) [file journal.pgph.0000961.s008]

## SPOT CHECK RECORDING FORM

State: ADAMAWA LGA: SONG Community: BONGO

NAME OF CAREGIVER(FEMALE).....TALATU BABA GARIN

Sex of index child: MALE Age of index child (in months):  
23

### Spot Check Information

1. Date of MNP distribution to household (circle option below based on LGA name above):

- |                                                                                                                       |                |
|-----------------------------------------------------------------------------------------------------------------------|----------------|
|  <b>Kebbi:</b> BirninKebbi&Jega LGA: | <b>June 16</b> |
|  <b>Kebbi:</b> Danko-wasagu:         | <b>June 17</b> |
|  <b>Adamawa:</b> Song, Ganye:        | (/"June 18")   |
|  <b>Adamawa:</b> Guyuk              | <b>June 19</b> |

2. Date of Spot Check Observation: 1-07-2015

3. Number of sachets remaining(Ask the caregiver to show you and count the specific number of sachets remaining):

46

4. Number of sachets that should remainusing one MNP sachet per day (Analyst only):

48

5. Number of sachets remaining / number of sachets should be remaining(Analyst only):

46 / 48 = 95.8 %

### Probes

**Question 1.** You have **XX** MNP sachets remaining. Explain how easy or difficult it was to use the MNP product on a daily basis for your child 6 – 23 months? (Circle one answer)

**Very Difficult**

**Difficult**

**(Easy)**

**Very Easy**

**Question 2.** Describe any specific challenges that you faced that made the MNP difficult to use on a daily basis?

**Question 3.** Describe specific aspects of the MNP product that you or your child enjoyed that made it easier to use on a daily basis? IT IS TASTELESS.PROPORTIONATE QUANTITY.IT WILL DEVELOP THE BRAIN OF THE CHILD.IT DRIVES AWAY MINOR ILLNESSES.

**Question 4.** What questions do you have about the MNP based on your experience using it? I WAS TOLD THE MNP HELPS DEVELOPS THE BRAIN OF A CHILD TO BE VERY INTELLIGENT,ASIDE THIS,DOES THE MNP HAVE ANY OTHER BENEFITS TO THE CHILD.? SECONDLY,CAN THE MNP BE MIXED WITH ANY OTHER FORM OF FOOD ASIDE SORGHUM GRUEL?

**Question 5.** What specific recommendations do you have that we can do as a program to make the MNP easier to use on a daily basis? THEY SHOULD PROVIDE READY TO USE FOOD TO BE MIXED WITH THE MNP.THEY SHOULD MAKE THE TASTE(MNP) VERY SWEET.
