# Supplementary material for: Acceptance and compliance with micronutrient powder (MNP) among children aged 6–23 months in northern Nigeria
Source: PLOS journal article supplement (doi:10.1371/journal.pgph.0000961), 2022-10-17
Supplement: S8 (10.1371/journal.pgph.0000961.s008) [file journal.pgph.0000961.s008]

## SPOT CHECK RECORDING FORM

State: Adamawa LGA: Guyuk Community: Purokayo

Name of caregiver (female): Asamma Joseph

Name or caregiver (male): .....

Sex of index child: Male Age of index child (in months): 19 months

### Spot Check Information

1. Date of MNP distribution to household (circle option below based on LGA name above):

✚ **Kebbi:** BirninKebbi&Jega LGA: **June 16**

✚ **Kebbi:** Danko-wasagu: **June 17**

✚ **Adamawa:** Song, Ganye: **June 18**

✚ **Adamawa:** Guyuk **June 19**

2. Date of Spot Check Observation: 12/7/2015

3. Number of sachets remaining (Ask the caregiver to show you and count the specific number of sachets remaining):

47

4. Number of sachets that should remain using one MNP sachet per day (Analyst only):

38

5. Number of sachets remaining / number of sachets should be remaining (Analyst only):

47 / 38 = 123.7 %

## **Probes**

**Question 1.** You have **XX** MNP sachets remaining. Explain how easy or difficult it was to use the MNP product on a daily basis for your child 6 – 23 months? (Circle one answer)

**Very Difficult**

**Difficult**

**Easy**

**Very Easy**

**Question 2.** Describe any specific challenges that you faced that made the MNP difficult to use on a daily basis?

After using this product for some days the child refused to take kunu mixed with the product. I was confused and I started mixing the product into solid foods like tuwo (guinea corn meal) and okro soup. After you came today and told me to try it once again I mix the product into kunu and add little sugar, the child eat all the kunu. I now understand how to device means to feed him daily with the product

**Question 3.** Describe specific aspects of the MNP product that you or your child enjoyed that made it easier to use on a daily basis?

The aspect that makes my job easier is the fact that I am to pick a sachet daily and use for the child. Everyday when I pick one sachet to use and mix it into either kunu or tuwo it makes it easy for me.

**Question 4.** What questions do you have about the MNP based on your experience using it?

- I do not have questions but I now understand that I suppose to think of different ways of preparing kunu so that my child can accept the product.

**Question 5.** What specific recommendations do you have that we can do as a program to make the MNP easier to use on a daily basis?

The product is very good even though I skip some days to administer it to my child, I have seen the general improvement in my child diet and all I can say is thank you to federal ministry of health for introducing this product to us.
