# Supplementary material for: Acceptance and compliance with micronutrient powder (MNP) among children aged 6–23 months in northern Nigeria
Source: PLOS journal article supplement (doi:10.1371/journal.pgph.0000961), 2022-10-17
Supplement: S8 (10.1371/journal.pgph.0000961.s008) [file journal.pgph.0000961.s008]

### 1.1.1 Instrument F –Direct Observation Form

#### <<Instrument F Direct Observation Form>>

**PI Name:** PragmaMathema,Stephen Kodish

**Study Title:** Formative research to develop an infant and young child feeding (IYCF) intervention with micronutrient powder (MNP) for children aged 6 – 23 months

**PI Version/Date:** Version1.0/January 24, 2015

Date: \_\_7/07/2015\_\_ Location: \_\_ganwoki community in Ganye\_\_

Data Collector: Aish aliyu dahiru\_\_\_\_\_ Participant ID: A mud house with a well in front\_\_

Main goals of this direct observation are to answer the following questions:

1. In this household, what would be the best way(s) to give nutritional supplements to young children? Why?
2. In this household, describe the food sharing that you observe throughout the meal. Are there any predictable patterns?
3. In this household, who is favored and how is this favoritism expressed during meal preparation and eating?

(TEAR OFF AT PERFORATED DOTTED LINE BELOW)

-----

PARTICIPANT ID: \_\_\_\_\_

Household Composition Table (Fill out as you do data collection)

| INITIALS | SEX (M/F) | AGE (estimated)        | Relationship to household | Description                                        |
|----------|-----------|------------------------|---------------------------|----------------------------------------------------|
| M        | F         | 27Yrs                  | mother                    | Wearing pink and blue wrapper                      |
| C        | M         | 13month(observe child) | Baby (son)                |                                                    |
| OG       | F         | 14 yrs                 | Older daughter            | Wearing blue wrapper and red shirt                 |
| HB       | M         | 37yrs                  | Husband brother           | Wearing brown kaftan                               |
| G        | F         | 17yrs                  | Mother sister             | Wearing brown shirt and skit                       |
| OB       | M         | 5yrs                   | Older son                 | Wearing blue checked shirt and black short uniform |
| H        | M         | 34yrs                  | husband                   | Wearing brown trouser and yellow shirt             |
|          |           |                        |                           |                                                    |

|  |  |  |  |  |
|--|--|--|--|--|
|  |  |  |  |  |
|  |  |  |  |  |
|  |  |  |  |  |
|  |  |  |  |  |
|  |  |  |  |  |
|  |  |  |  |  |
|  |  |  |  |  |

PARTICIPANT ID: \_\_\_\_\_

| TIME | ACTOR INITIALS | RECIPIENT INITIALS | WHAT HAPPENED                                                        | FOOD | Reactivity |
|------|----------------|--------------------|----------------------------------------------------------------------|------|------------|
|      |                |                    |                                                                      |      |            |
| 8:00 | M              |                    | sweeping                                                             |      |            |
| 8:05 | M              |                    | sweeping                                                             |      |            |
| 8:05 | C              |                    | Playing in the verandah                                              |      |            |
| 8:10 | M              |                    | sweeping                                                             |      |            |
| 8:15 | M              |                    | Washing hand to carry baby                                           |      |            |
| 8:20 | M              | C                  | Carry child on her laps                                              |      |            |
| 8:25 | M              | C                  | Breastfeeding the child                                              |      |            |
| 8:30 | OG             |                    | Washing the utensils                                                 |      |            |
| 8:35 | M              | C                  | Breastfeeding the child                                              |      |            |
| 8:40 | OG             |                    | Washing the utensils                                                 |      |            |
| 8:45 | M              | C                  | Breastfeeding the child                                              |      |            |
| 8:50 | OG             |                    | Taking the cleaned utensils into the room                            |      |            |
| 8:55 | M              |                    | Starting fire                                                        |      |            |
| 9:00 | M              | OG                 | Starting fire                                                        |      |            |
| 9:05 | M              | OG                 | Chatting with older daughter sitting under the shade beside the room |      |            |
| 9:10 | M              | OG                 | Chatting with older daughter waiting for water to boil               |      |            |
| 9:15 | M              | C                  | Carrying the child on her laps                                       |      |            |

| TIME  | ACTOR INITIALS | RECIPIENT INITIALS | WHAT HAPPENED                                                                                         | FOOD                       | Reactivity |
|-------|----------------|--------------------|-------------------------------------------------------------------------------------------------------|----------------------------|------------|
| 9:20  | M              | C                  | Breast feeding the child                                                                              |                            |            |
| 9:25  | M              | C                  | Breast feeding the child                                                                              |                            |            |
| 9:30  | C              |                    | Sleeping on the mothers lap                                                                           |                            |            |
| 9:30  | OG             |                    | Washing flask that was brought out from the room                                                      |                            |            |
| 9:35  | C              |                    | Sleeping on mother's lap                                                                              |                            |            |
| 9:40  | M              | C                  | Lying down child on the bed in the room                                                               |                            |            |
| 9:40  | M              |                    | Checking the fire wood                                                                                |                            |            |
| 9:45  | OG             |                    | Bringing water into the house from the well outside in a metal bucket                                 |                            |            |
| 9:45  | M              |                    | Rewashing the flask the daughter washed earlier                                                       |                            |            |
| 9:50  | OG             |                    | Taking her bath                                                                                       |                            |            |
| 9:50  | M              |                    | Checking the firewood                                                                                 |                            |            |
| 9:55  | M              | HB                 | Chatting with husbands brother                                                                        |                            |            |
| 10:00 | M              |                    | Mixing groundnut paste with water to make a watery mixture.                                           | Groundnut                  |            |
| 10:05 | M              |                    | Adding guinea corn flour into the groundnut mixture and mixing well to become smooth.                 | Guinea corn and ground nut |            |
| 10:10 | M              | HB                 | Chatting with husband's brother                                                                       |                            |            |
| 10:15 | M              |                    | Adding guinea corn and groundnut mixture into the boiling water on the fire and stirring to make kunu |                            |            |
| 10:15 | C              |                    | Sleeping on the bed in the room                                                                       |                            |            |
| 10:20 | M              |                    | Still stirring the kunu to cook well                                                                  |                            |            |
| 10:25 | M              |                    | Mixing sugar and tamarind in a bowl                                                                   |                            |            |
| 10:30 | M              |                    | Adding the sugar and tamarind and mix into the kunu on the fire                                       | Kunun gyada                |            |
| 10:35 | M              |                    | Kunu is ready to be served                                                                            | Kunun gyada                |            |
| 10:35 | M              |                    | Carrying the pot of kunu to the veranda                                                               | Kunun gyada                |            |
| 10:35 | M              | OG                 | Chatting with the older daughter who is dressing up for school                                        |                            |            |
| 10:40 | M              |                    | Serving the kunu in a large bowl                                                                      | Kunun gyada                |            |
| 10:40 | M              |                    | Stirring the kunu to cool                                                                             | Kunun gyada                |            |

| TIME  | ACTOR INITIALS | RECIPIENT INITIALS | WHAT HAPPENED                                                                                  | FOOD        | Reactivity |
|-------|----------------|--------------------|------------------------------------------------------------------------------------------------|-------------|------------|
| 10:45 | M              |                    | Still stirring the kunu to cool                                                                | Kunun gyada |            |
| 10:50 | M              | OG                 | Chatting with the older daughter while stirring the kunu                                       | Kunun gyada |            |
| 10:50 | C              |                    | Still sleeping                                                                                 |             |            |
| 10:55 | OG             |                    | Leaving for school carrying a bag                                                              |             |            |
| 10:55 | M              |                    | Still stirring the kunu to cool                                                                | Kunun gyada |            |
| 10:55 | C              |                    | Still sleeping in the room                                                                     |             |            |
| 11:00 | C              |                    | Still sleeping in the room                                                                     |             |            |
| 11:05 | M              |                    | Serving kunu into the flask                                                                    | Kunun gyada |            |
| 11:10 | M              |                    | Sweeping the veranda                                                                           |             |            |
| 11:15 | M              |                    | Washing her hands                                                                              |             |            |
| 11:20 | M              |                    | Sitting under the shade on the mat                                                             |             |            |
| 11:25 | M              | G                  | Chatting with sister under the shade                                                           |             |            |
| 11:30 | M              | G                  | Chatting with sister                                                                           |             |            |
| 11:35 | C              |                    | Wakes up crying                                                                                |             |            |
| 11:35 | G              | C                  | Carrying the child from the room                                                               |             |            |
| 11:35 | G              | C                  | Giving the child water to drink in a cup from the clay pot in front of the room                | Water       |            |
| 11:40 | M              | C                  | Carrying child on her laps. Playing with him                                                   |             |            |
| 11:45 | M              | C                  | Giving the child breast but he refused to breastfeed                                           | Breast milk |            |
| 11:50 | M              | C                  | Carrying the child on her laps                                                                 |             |            |
| 11:50 | M              | G                  | Chatting with sister under the shade                                                           |             |            |
| 11:55 | G              | C                  | Carrying the child on her lap showing him something on mobile phone                            |             |            |
| 11:55 | M              |                    | Serving kunu from flask into a small cup                                                       | Kunun gyada |            |
| 12:00 | M              |                    | Goes into room and brings MNP. Adding the MNP into the kunu ensuring the child did not see the | Kunun gyada |            |

| TIME  | ACTOR INITIALS | RECIPIENT INITIALS | WHAT HAPPENED                                                                                              | FOOD        | Reactivity |
|-------|----------------|--------------------|------------------------------------------------------------------------------------------------------------|-------------|------------|
|       |                |                    | MNP                                                                                                        |             |            |
| 12:00 | M              |                    | Stirring the kunu to ensure the MNP dissolves well into the kunu                                           | Kunun gyada |            |
| 12:05 | M              | C                  | Feeding the child the kunu mixed with MNP on her laps. Feeding him with the cup                            | Kunun gyada |            |
| 12:06 | C              |                    | Drinking the kunu from the cup with ease                                                                   | Kunun gyada |            |
| 12:07 | C              |                    | Crying and refusing to take more kunu from the mother                                                      | Kunun gyada |            |
| 12:08 | M              | C                  | Forcefully giving the child the rest of the kunu. He gulps down whenever it enters his mouth but is crying | Kunun gyada |            |
| 12:09 | M              | C                  | Still feeding the child the kunu                                                                           | Kunun gyada |            |
| 12:10 | M              | C                  | Washing child's hands and mouth after he finishes the whole kunu that was served into the cup              | Kunun gyada |            |
| 12:15 | M              | C, G               | Carrying child on her laps while chatting with sister                                                      |             |            |
| 12:20 | G              |                    | Lying down on the ground under the shade chatting with the mother                                          |             |            |
| 12:25 | C              | OB                 | Running towards brother when he came in and hugging him                                                    |             |            |
| 12:30 | OB             |                    | Drinking water from the clay pot in front of the room                                                      |             |            |
| 12:30 | M              |                    | Serving kunu into a bowl for the older son                                                                 | Kunun gyada |            |
| 12:35 | M              |                    | Lying down on the veranda chatting with sister                                                             |             |            |
| 12:35 | G              |                    | Lying down in the room chatting with sister                                                                |             |            |
| 12:35 | B              |                    | Playing near the older son who is drinking his kunu                                                        |             |            |
| 12:35 | OB             |                    | Drinking kunu from the bowl with a large spoon                                                             |             |            |
| 12:40 | B              |                    | Playing around the veranda. Enters room comes out and enters the other room too. Playing with              |             |            |

| TIME  | ACTOR INITIALS | RECIPIENT INITIALS | WHAT HAPPENED                                                                      | FOOD        | Reactivity |
|-------|----------------|--------------------|------------------------------------------------------------------------------------|-------------|------------|
|       |                |                    | the curtain as he comes out from the room.                                         |             |            |
| 12:45 | M              | G                  | Chatting with sister                                                               |             |            |
| 12:50 | B              |                    | Sitting beside mother under a tree in the veranda                                  |             |            |
| 12:55 | B              | OB                 | Playing with brother while he's drinking kunu                                      | Kunun gyada |            |
| 12:55 | OB             |                    | Licking the bowl after drinking the whole kunu                                     | Kunun gyada |            |
| 13:00 | OB             |                    | Washing his hands and mouth with water after dropping the bowl in the washing area |             |            |
| 13:05 | OB             | B                  | Playing with child in the veranda beside the mother                                |             |            |
| 13:10 | M              | G                  | Chatting with sister                                                               |             |            |
| 13:15 | M              | CL                 | Chatting with community leader who came in                                         |             |            |
| 13:20 | M              | CL                 | Chatting with community leader                                                     |             |            |
| 13:25 | M              |                    | Goes into room and bring out a bottle of oil                                       |             |            |
| 13:25 | M              | CL                 | Handing the bottle to the community leader and collecting money                    |             |            |
| 13:30 | CL             |                    | Bringing back the bottle chatting with the mother                                  |             |            |
| 13:30 | OB             | B                  | Playing on the veranda                                                             |             |            |
| 13:35 | B              |                    | Lying down on the veranda                                                          |             |            |
| 13:35 | OB             | B                  | Tickling the child while lying down on his back                                    |             |            |
| 13:40 | M              |                    | Putting more oil in the bottle the community leader brought back                   |             |            |
| 13:45 | M              | OB                 | Scolding the older son for playing roughly with the child                          |             |            |
| 13:50 | OB             | B                  | Playing with child. Making car sound while the child is laughing                   |             |            |
| 13:55 | B              |                    | Drawing lines on the wall by the                                                   |             |            |

| TIME  | ACTOR INITIALS | RECIPIENT INITIALS | WHAT HAPPENED                                                                         | FOOD        | Reactivity |
|-------|----------------|--------------------|---------------------------------------------------------------------------------------|-------------|------------|
|       |                |                    | room's entrance with a chalk                                                          |             |            |
| 14:00 | B              |                    | Playing with the older son by the room door                                           |             |            |
| 14:05 | OB             | B                  | Playing with child on the veranda                                                     |             |            |
| 14:05 | M              |                    | Lying down on the veranda                                                             |             |            |
| 14:10 | H              |                    | Listening to the radio outside the room and under a shade                             |             |            |
| 14:15 | H              | M                  | Chatting with the mother                                                              |             |            |
| 14:20 | OB             | B                  | Running around the house with the child                                               |             |            |
| 14:25 | H              | B                  | Carrying child on his lap while listening to the radio                                |             |            |
| 14:30 | H              |                    | Getting water from the well to take his bath. Back from farm earlier but rested first |             |            |
| 14:35 | H              |                    | Taking his bath                                                                       |             |            |
| 14:35 | B              |                    | Sitting beside the mother playing                                                     |             |            |
| 14:40 | B              |                    | Playing beside the mother with chalk                                                  |             |            |
| 14:45 | OB             |                    | Lying down beside the mother on the veranda                                           |             |            |
| 14:50 | H              | M                  | Chatting with the mother                                                              |             |            |
| 14:55 | M              | B                  | Playing with the child                                                                |             |            |
| 15:00 | H              | M                  | Chatting with the mother                                                              |             |            |
| 15:05 | M              | B                  | Breastfeeding the child while lying down                                              | Breast milk |            |
| 15:10 | M              | H, B               | Chatting with the husband while breastfeeding the child                               | Breast milk |            |
| 15:15 | M              | B                  | Breast feeding the child                                                              | Breast milk |            |
| 15:20 | M              | B                  | Breast feeding the child                                                              | Breast milk |            |
| 15:25 | H              | M                  | Chatting with the mother                                                              |             |            |

| TIME  | ACTOR INITIALS | RECIPIENT INITIALS | WHAT HAPPENED                                                             | FOOD                         | Reactivity |
|-------|----------------|--------------------|---------------------------------------------------------------------------|------------------------------|------------|
|       |                |                    |                                                                           |                              |            |
| 15:30 | B              |                    | Sleeping on mother's lap                                                  |                              |            |
| 15:35 | M              | B                  | Child sleeping on the veranda and covered with wrapper                    |                              |            |
| 15:40 | M              |                    | Starting fire                                                             |                              |            |
| 15:45 | M              |                    | Starting fire                                                             |                              |            |
| 15:50 | M              |                    | Starting fire                                                             |                              |            |
| 15:55 | M              |                    | Waiting for water to boil before adding guinea corn flour and make a meal |                              |            |
| 16:00 | M              |                    | Adding guinea corn flour into boiling water on fire to make meal          | Guinea corn, water           |            |
| 16:05 | M              |                    | Stirring to ensure meal is smooth                                         | Guinea corn, water           |            |
| 16:10 | M              |                    | Adding more guinea corn flour into meal                                   | Guinea corn, water           |            |
| 16:15 | M              |                    | Covering meal to let it cook well                                         | Tuwon dawa/ guinea corn meal |            |
| 16:20 | M              |                    | Meal is ready to be served                                                | Guinea corn meal             |            |
| 16:20 | M              |                    | Serving meal into large flask                                             | Guinea corn meal             |            |
| 16:25 | M              |                    | Washing hands after preparing meal                                        |                              |            |
| 16:30 | M              |                    | Adding water into another pot on fire                                     | Water                        |            |
| 16:35 | M              |                    | Washing pumpkin which is already peeled and put into the pot on fire      | Pumpkin                      |            |
| 16:35 | M              |                    | Cutting pumpkin into small pieces                                         | Pumpkin                      |            |
| 16:40 | M              |                    | Adding pumpkin into pot on fire                                           | Pumpkin                      |            |



| TIME  | ACTOR INITIALS | RECIPIENT INITIALS | WHAT HAPPENED                                               | FOOD            | Reactivity |
|-------|----------------|--------------------|-------------------------------------------------------------|-----------------|------------|
|       |                |                    |                                                             |                 |            |
| 16:40 | M              | B                  | Checking on sleeping child                                  |                 |            |
| 16:45 | M              |                    | Cutting pumpkin leaves in a bowl                            | Pumpkin leaves  |            |
| 16:50 | M              |                    | Cutting okro in a separate bowl                             | Okro            |            |
| 16:55 | M              |                    | Adding okro into pot on fire                                | Okro, pumpkin   |            |
| 16:55 | M              |                    | Washing pumpkin leaves and kept aside                       | Pumpkin leaves  |            |
| 17:00 | M              |                    | Checking firewood                                           |                 |            |
| 17:05 | M              |                    | Adding pumpkin leaves into pot on fire                      | Pumpkin leaves  |            |
| 17:05 | B              |                    | Still sleeping on the veranda                               |                 |            |
| 17:10 | M              |                    | Adding groundnut paste mixed with water into pot on fire    | Groundnut paste |            |
| 17:10 | M              |                    | Stirring the soup to ensure all ingredients mix well        | Pumpkin soup    |            |
| 17:15 | M              |                    | Adding pepper, salt and other ingredients into soup         | Pumpkin soup    |            |
| 17:15 | M              |                    | Tasting to ensure salt is adequate                          | Pumpkin soup    |            |
| 17:20 | M              |                    | Soup is ready to be served                                  |                 |            |
| 17:20 | M              |                    | Keeping the pot of soup aside                               | Pumpkin soup    |            |
| 17:25 | M              |                    | Sweeping the cooking area                                   |                 |            |
| 17:30 | M              |                    | Washing the utensils used in cooking                        |                 |            |
| 17:35 | M              | B                  | Checking the child                                          |                 |            |
| 17:35 | B              |                    | Awake and just lying down on the wrapper under the verander |                 |            |
| 17:35 | M              | B                  | Carrying the child                                          |                 |            |
| 17:40 | M              | B                  | Bathing the child                                           |                 |            |

[illegible]

[illegible]

[illegible]

[illegible]

[illegible]

| TIME | ACTOR INITIALS | RECIPIENT INITIALS | WHAT HAPPENED | FOOD | Reactivity |
|------|----------------|--------------------|---------------|------|------------|
|      |                |                    |               |      |            |
|      |                |                    |               |      |            |
|      |                |                    |               |      |            |
|      |                |                    |               |      |            |
|      |                |                    |               |      |            |

PARTICIPANT ID: \_\_\_\_\_

Primary Questions (Complete after you complete data collection):

From what you have seen observing THIS HOUSEHOLD, please answer the following questions in detail:

| Question                                                                                                                                                      | Write your <u>detailed</u> response here                                                                                                                                                                                                             |
|---------------------------------------------------------------------------------------------------------------------------------------------------------------|------------------------------------------------------------------------------------------------------------------------------------------------------------------------------------------------------------------------------------------------------|
| <p>1. In this household, what would be the best way(s) to give nutritional supplements such as an MNP to young children to ensure compliance?</p> <p>Why?</p> | <p>The best way to ensure compliance is for the mother to ensure that time is fixed for giving the MNP</p>                                                                                                                                           |
| <p>2. In this household, who is favored during meal preparation or feeding?</p> <p>How is this favoritism expressed?</p>                                      | <p>The parents are favoured during meal preparation because the food prepared was in a solid state even though a semi-solid food was prepared.</p> <p>It was prepared just for administering the MNP and the older children drank it too.</p>        |
| <p>3. How could we promote the MNP supplement for this family that would attract their attention?</p>                                                         | <p>This can be through the mother and the older daughter.</p> <p>The father can also be an influence because he's the one who has final say in decision in the household.</p> <p>The father was listening to the radio, this can also be used in</p> |

|                                                                                                                                                                                                                 |                                                                                                                                                                                                                                                                                    |
|-----------------------------------------------------------------------------------------------------------------------------------------------------------------------------------------------------------------|------------------------------------------------------------------------------------------------------------------------------------------------------------------------------------------------------------------------------------------------------------------------------------|
| Who would they listen to?                                                                                                                                                                                       | promoting the product. The community leader too can influence them because he is respected and the woman spoke highly respectful to him.                                                                                                                                           |
| 4. In this household, what would be the best ways to promote the MNP but limit how much it would be shared?<br><br>Why?                                                                                         | The best way to limit the sharing is through constant reminder to the mother on the implication of sharing the MNP because she will be reminded about the benefits of the MNP and if it is shared, it can neither benefit the child that its meant for and the person shared with. |
| 5. What other issues and concerns did you see with this family that are important for us to consider with regard to introduction of an MNP?<br><br>Why?                                                         | There is good hygiene in the household. They all washed hands before and after meal.<br>The mother washed her hands before preparing the meals and after. She also swept the household and the cooking area after meal. Utensils were washed and kept in a clean place.            |
| 6. Based on your experience observing this child today, do you believe reactivity negatively impacted your ability to see the food-related behaviors of the child?<br><br>Please explain your answer in detail. | Reactivity did not affect behavior of the child.<br>The mother admitted to having difficulties feeding the child in recent days but it is due to fever which is being treated for.                                                                                                 |
