# Supplementary material for: Acceptance and compliance with micronutrient powder (MNP) among children aged 6–23 months in northern Nigeria
Source: PLOS journal article supplement (doi:10.1371/journal.pgph.0000961), 2022-10-17
Supplement: S8 (10.1371/journal.pgph.0000961.s008) [file journal.pgph.0000961.s008]

# SPOT CHECK RECORDING FORM

State: Kebbi LGA: D/Wasagu Community: D/dogo

Sex of index child: M Age of index child (in months): 13

## Spot Check Information

1. Date of MNP distribution to household (circle option below based on LGA name above):

🚦 Kebbi: BirninKebbi&Jega LGA: June 16

🚦 Kebbi: Danko-wasagu: June 17

🚦 Adamawa:Song, Ganye: June 18

🚦 Adamawa:Guyuk June 19

2. Date of Spot Check Observation: 13/07/15

3. Number of sachets remaining(Ask the caregiver to show you and count the specific number of sachets remaining):

31

4. Number of sachets that should remainusing one MNP sachet per day (Analyst only):

35

5. Number of sachets remaining / number of sachets should be remaining(Analyst only):

\_\_\_\_31\_\_\_\_ / \_\_\_\_35\_\_\_\_ = \_\_\_\_88.6\_\_\_\_ %

## Probes

**Question 1.** You have **XX** MNP sachets remaining. Explain how easy or difficult it was to use the MNP product on a daily basis for your child 6 – 23 months? (Circle one answer)

**Very Difficult**

**Difficult**

**Easy**

**Very Easy**

**Question 2.** Describe any specific challenges that you faced that made the MNP difficult to use on a daily basis?

There was no challenge whatsoever for me, it was very easy to use. I followed the directives and did not have any problem with it

**Question 3.** Describe specific aspects of the MNP product that you or your child enjoyed that made it easier to use on a daily basis?

It makes him eat more now, sincerely I am happy

**Question 4.** What questions do you have about the MNP based on your experience using it?

**My baby has started rejecting the MNP now, can you please tell me why?**

**Question 5.** What specific recommendations do you have that we can do as a program to make the MNP easier to use on a daily basis?

Please you people should bring more of it so that other women can get to use it for their babies and maybe you should add more sugar to it so that the children will enjoy it more
