# Supplementary material for: Acceptance and compliance with micronutrient powder (MNP) among children aged 6–23 months in northern Nigeria
Source: PLOS journal article supplement (doi:10.1371/journal.pgph.0000961), 2022-10-17
Supplement: S8 (10.1371/journal.pgph.0000961.s008) [file journal.pgph.0000961.s008]

### 1.1.1 Instrument F –Direct Observation Form

#### <<Instrument F Direct Observation Form>>

**PI Name:** PragmaMathema,Stephen Kodish

**Study Title:** Formative research to develop an infant and young child feeding (IYCF) intervention with micronutrient powder (MNP) for children aged 6 – 23 months

**PI Version/Date:** Version1.0/January 24, 2015

Date: \_June 27, 2015\_\_\_\_\_Location: \_ Lakumna community,GUYUK, LGA\_\_\_\_\_

Data Collector: Aisha Aliyu Dahiru\_\_\_\_\_Participant ID: \_\_Mud house with Neem tree in front

Main goals of this direct observation are to answer the following questions:

1. In this household, what would be the best way(s) to give nutritional supplements to young children? Why?
2. In this household, describe the food sharing that you observe throughout the meal. Are there any predictable patterns?
3. In this household, who is favored and how is this favoritism expressed during meal preparation and eating?

(TEAR OFF AT PERFORATED DOTTED LINE BELOW)

-----

PARTICIPANT ID: small hut with low verandah\_\_

Household Composition Table (Fill out as you do data collection)

| INITIALS | SEX (M/F) | AGE (estimated) | Relationship to household | Description                                        |
|----------|-----------|-----------------|---------------------------|----------------------------------------------------|
| M        | F         | 26YRS           | Mother                    | Wearing pink shirt with plaited hair.              |
| G        | F         | 16 MONTHS       | Baby girl daughter        | Wearing brown dress                                |
| N1       | F         | 26 YRS          | Neighbour                 | Wearing yellow wrapper                             |
| N2       | F         | 24 YRS          | Neighbor                  | Wearing blue wrapper and carrying baby on her back |
| GM       | F         | 70YRS           | Grand mother              | Wearing black shirt and a head tie                 |
| N3       | F         | 29 YRS          | Neighbour                 | Wearing purple stripped shirt with orange wrapper  |
| OC       | M         | 5 years         | Older son                 | Wearing green shirt                                |

|  |  |  |  |  |
|--|--|--|--|--|
|  |  |  |  |  |
|  |  |  |  |  |
|  |  |  |  |  |
|  |  |  |  |  |
|  |  |  |  |  |
|  |  |  |  |  |
|  |  |  |  |  |
|  |  |  |  |  |
|  |  |  |  |  |

PARTICIPANT ID: \_small hut wit low verandah\_\_\_\_\_

| TIME | ACTOR INITIALS | RECIPIENT INITIALS | WHAT HAPPENED                                 | FOOD | Reactivity |
|------|----------------|--------------------|-----------------------------------------------|------|------------|
| 8.00 | M              |                    | Washing utensils                              |      |            |
| 8:05 | M              |                    | Washing utensils                              |      |            |
| 8:10 | M              |                    | Washing utensils                              |      |            |
| 8:15 | M              |                    | Washing utensils                              |      |            |
| 8:20 | M              |                    | Washing utensils                              |      |            |
| 8:25 | M              |                    | Keeping the utensils in a corner in the house |      |            |
| 8:30 | M              |                    | Pick broom and start sweeping                 |      |            |
| 8:35 | M              |                    | Sweeping                                      |      |            |
| 8:40 | M              |                    | Sweeping                                      |      |            |
| 8:45 | M              |                    | Sweeping                                      |      |            |
| 8:50 | M              |                    | Starting fire                                 |      |            |

| TIME | ACTOR INITIALS | RECIPIENT INITIALS | WHAT HAPPENED                                                                      | FOOD                         | Reactivity |
|------|----------------|--------------------|------------------------------------------------------------------------------------|------------------------------|------------|
|      |                |                    |                                                                                    |                              |            |
| 8:55 | M              |                    | Starting fire                                                                      |                              |            |
| 9:00 | M              |                    | Placing pot with water on fire                                                     | water                        |            |
| 9:00 | M              | G                  | Carrying baby on her back                                                          |                              |            |
| 9:05 | M              |                    | Carrying baby on her back                                                          |                              |            |
| 9:05 | M              |                    | Brings out guinea corn flour from the room                                         | Guinea corn flour            |            |
| 9:10 | M              |                    | Takes a portion of guinea corn flour in a small bowl and mix with water            | Guinea corn flour with water |            |
| 9:15 | M              |                    | Adding guinea corn mixture to boiling water on fire                                | Guinea corn flour with water |            |
| 9:15 | M              | G                  | Carrying baby on her back                                                          |                              |            |
| 9:20 | M              |                    | Kunu is ready to be served                                                         | Kunun dwa                    |            |
| 9:20 |                |                    | Serving kunu into flask                                                            | Kunun dwa                    |            |
| 9:25 | M              |                    | Serving kunu into a cup and keeping it to cool down                                | Kunun dwa                    |            |
| 9:30 | M              | G                  | Feeding baby with kunu using spoon. Baby is taking the kunu without any resistance | Kunun dwa                    |            |
| 9:31 | M              | G                  | Feeding the baby                                                                   | Kunun dwa                    |            |
| 9:32 | M              | G                  | Feeding the baby                                                                   | Kunun dwa                    |            |
| 9:33 | M              | G                  | Feeding the baby                                                                   | Kunun dwa                    |            |
| 9:34 | M              | G                  | Feeding the baby                                                                   | Kunun dwa                    |            |

| TIME  | ACTOR INITIALS | RECIPIENT INITIALS | WHAT HAPPENED                                         | FOOD | Reactivity |
|-------|----------------|--------------------|-------------------------------------------------------|------|------------|
| 9:35  | M              | G                  | Washing the baby hands and mouth                      |      |            |
| 9:40  | M              | G                  | Bathing the baby                                      |      |            |
| 9:45  | M              | G                  | Bathing the baby                                      |      |            |
| 9:50  | M              | G                  | Bathing the baby                                      |      |            |
| 9:55  | M              | G                  | Dressing the baby                                     |      |            |
| 9:55  | M              | G                  | Combing the baby's hair                               |      |            |
| 10:00 | G              |                    | Baby playing on the mat                               |      |            |
| 10:05 | G              |                    | Playing on the mat                                    |      |            |
| 10:10 | M              |                    | Washing clothes                                       |      |            |
| 10:15 | M              |                    | Washing clothes                                       |      |            |
| 10:20 | M              |                    | Washing clothes                                       |      |            |
| 10:25 | M              |                    | Washing clothes                                       |      |            |
| 10:30 | M              |                    | Washing clothes                                       |      |            |
| 10:30 | G              |                    | Playing on the mat                                    |      |            |
| 10:35 | M              |                    | Spreading clothes to dry on the fence                 |      |            |
| 10:35 | G              |                    | Playing on the mat                                    |      |            |
| 10:40 | G              |                    | Goes out and enters next house. The grandmother house |      |            |
| 10:45 | G              |                    | Sitting on the mat beside the grandmother             |      |            |
| 10:50 | GM             | G                  | Playing with the baby and tickling her belle          |      |            |
| 10:55 | GM             | G                  | Pick up the baby and carry her on her lap             |      |            |
| 10:55 | GM             | G                  | Playing with the baby                                 |      |            |
| 11:00 | GM             | G                  | Playing with the baby                                 |      |            |
| 11:00 | G              |                    | Baby goes to play with other children under the shade |      |            |
| 11:05 | G              |                    | Playing around the house with other children          |      |            |

| TIME  | ACTOR INITIALS | RECIPIENT INITIALS | WHAT HAPPENED                          | FOOD        | Reactivity |
|-------|----------------|--------------------|----------------------------------------|-------------|------------|
| 11:10 | G              |                    | playing with other children            |             |            |
| 11:15 | G              |                    | Goes back to other and sits on her lap |             |            |
| 11:15 | G              |                    | Sitting on mother lap playing          |             |            |
| 11:20 | M              | G                  | Mother breastfeeding baby              | Breast milk |            |
| 11:21 | M              | G                  | Mother breastfeeding baby              | Breast milk |            |
| 11:22 | M              | G                  | Mother breastfeeding baby              | Breast milk |            |
| 11:27 | G              |                    | Playing on the mat                     |             |            |
| 11:32 | G              |                    | Playing on the mat                     |             |            |
| 11:37 | M              |                    | Sitting on the mat beside the baby     |             |            |
| 11:42 | N1             | M                  | Comes in greeting the mother           |             |            |
| 11:42 | M              | N1                 | Chatting with the neighbor             |             |            |
| 11:47 | M              | N1                 | Chatting with the neighbor             |             |            |
| 11:52 | N2             |                    | Comes into the house, greeting mother  |             |            |
| 11:52 | M              | N1,N2              | Chatting with the neighbors            |             |            |
| 11:52 | G              |                    | Playing on mother's lap                |             |            |
| 11:57 | N1             | N2                 | Goes out chatting with the neighbors   |             |            |
| 11:57 | M              | G                  | Playing baby on the mat                |             |            |
| 12:02 | G              |                    | Playing on the mat by herself          |             |            |
| 12:07 | M              |                    | Brings tuwo from grandmothers house    | Tuwon dwa   |            |
| 12:07 | G              |                    | Crying that the bowl of tuwon          | Tuwon       |            |

| TIME  | ACTOR INITIALS | RECIPIENT INITIALS | WHAT HAPPENED                                                                                                                     | FOOD                    | Reactivity |
|-------|----------------|--------------------|-----------------------------------------------------------------------------------------------------------------------------------|-------------------------|------------|
|       |                |                    | should be given to her                                                                                                            | dawa, okro soup         |            |
| 12:07 | M              | G                  | Washing baby's hand where she is sitting                                                                                          |                         |            |
| 12:12 | G              |                    | Eating tuwo with her hand                                                                                                         | Tuwon masara, okro soup |            |
| 12:13 | G              |                    | Eating tuwo with her hands                                                                                                        | Tuwon masara, okro soup |            |
| 12:14 | M              |                    | Joins baby to eat tuwo                                                                                                            | Tuwon masara, okro soup |            |
| 12:15 | M              | G                  | Assisting the baby to eat but the baby refused after collecting the first two morsels. The baby insists on eating with her hands. | Tuwon masara, okro soup |            |
| 12:16 | M              |                    | Eating with the baby                                                                                                              |                         |            |
| 12:17 | G              |                    | Eating with her hand                                                                                                              | Tuwon masara            |            |
| 12:18 | G              |                    | Baby is drinking water from a cup beside the mother                                                                               | Water                   |            |
| 12:23 | M              | G                  | Mother washing baby hands and mouth                                                                                               |                         |            |
| 12:23 | G              |                    | Picks the bowl of tuwo and licked it                                                                                              |                         |            |
| 12:23 | M              | G                  | Collect the bowl from the baby                                                                                                    |                         |            |
| 12:23 | G              |                    | Crying and protesting because of the bowl                                                                                         |                         |            |
| 12:28 | M              | G                  | Consoling the baby                                                                                                                |                         |            |

| TIME  | ACTOR INITIALS | RECIPIENT INITIALS | WHAT HAPPENED                                                        | FOOD        | Reactivity |
|-------|----------------|--------------------|----------------------------------------------------------------------|-------------|------------|
| 12:33 | G              |                    | Playing on mother's lap                                              |             |            |
| 12:38 | M              |                    | Sitting by the door post with the baby                               |             |            |
| 12:43 | G              |                    | Playing with padlock on the room door                                |             |            |
| 12:48 | G              |                    | Playing with padlock and bowl beside the mother in front of the room |             |            |
| 12:53 | G              |                    | Playing beside mother                                                |             |            |
| 12:58 | M              | G                  | Teaching baby some words in local language                           |             |            |
| 1:03  | G              |                    | Repeating each word that the mother speaks                           |             |            |
| 1:08  | M              | G                  | Bathing baby                                                         |             |            |
| 1:13  | M              | G                  | Keep baby on the mat                                                 |             |            |
| 1:18  | G              |                    | Playing on the mat with a toy phone                                  |             |            |
| 1:23  | M              | G                  | Dressing baby                                                        |             |            |
| 1:28  | M              | G                  | Playing with baby                                                    |             |            |
| 1:33  | M              | G                  | Breastfeeding the baby                                               | Breast milk |            |
| 1:34  | M              | G                  | Breastfeeding the baby                                               | Breast milk |            |
| 1:45  | M              | G                  | Breastfeeding the baby                                               | Breast milk |            |
| 1:46  | M              | G                  | Breastfeeding the baby                                               | Breast milk |            |
| 1:46  | G              |                    | Baby is sleeping                                                     |             |            |
| 1:51  | G              |                    | sleeping                                                             |             |            |
| 1:56  | G              |                    | Sleeping                                                             |             |            |
| 2:01  | G              |                    | Sleeping                                                             |             |            |
| 2:06  | G              |                    | sleeping                                                             |             |            |

| TIME | ACTOR INITIALS | RECIPIENT INITIALS | WHAT HAPPENED                                | FOOD        | Reactivity |
|------|----------------|--------------------|----------------------------------------------|-------------|------------|
| 2:11 | G              |                    | sleeping                                     |             |            |
| 2:16 | G              |                    | sleeping                                     |             |            |
| 2:21 | G              |                    | sleeping                                     |             |            |
| 2:26 | G              |                    | sleeping                                     |             |            |
| 2:31 | M              |                    | Sitting under the tree in front of the house |             |            |
| 2:36 | M              | N1,N2              | Chatting with neighbours                     |             |            |
| 2:41 | M              | N1,N2              | Chatting with neighbours                     |             |            |
| 2:46 | N1             |                    | Breastfeeding her baby                       | Breast milk |            |
| 2:51 | N2             |                    | Combing daughters hair                       |             |            |
| 2:56 | G              |                    | Sleeping                                     |             |            |
| 3:01 | G              |                    | Sleeping                                     |             |            |
| 3:06 | M              | N1,N2              | Chatting with neighbours                     |             |            |
| 3:11 | N3             |                    | Join mother and neighbor under the tree      |             |            |
| 3:16 | M              | N1,N2,N3           | Chatting with neighbor                       |             |            |
| 3:21 | G              |                    | Sleeping                                     |             |            |
| 3:26 | G              |                    | Wakes up crying                              |             |            |
| 3:31 | M              | G                  | Pick up crying baby                          |             |            |
| 3:36 | M              | G                  | Consoling baby, sitting under the tree       |             |            |
| 3:41 | M              | G                  | Consoling baby , sitting under the tree      |             |            |
| 3:46 | G              |                    | Playing on the mat under the tree            |             |            |
| 3:51 | M              | G                  | Carrying baby on lap                         |             |            |
| 3:56 | M              | G                  | Breastfeeding baby                           | Breast milk |            |
| 4:01 | M              | G                  | Breastfeeding baby                           | Breast milk |            |
| 4:02 | M              | G                  | Breastfeeding baby                           | Breast milk |            |
| 4:03 | M              | G                  | Breastfeeding baby                           | Breast      |            |



| TIME | ACTOR INITIALS | RECIPIENT INITIALS | WHAT HAPPENED                                                                                                    | FOOD            | Reactivity |
|------|----------------|--------------------|------------------------------------------------------------------------------------------------------------------|-----------------|------------|
|      |                |                    |                                                                                                                  | milk            |            |
| 4:04 | M              | G                  | Breastfeeding baby                                                                                               | Breast milk     |            |
| 4:05 | M              | G                  | Baby playing on the ground                                                                                       |                 |            |
| 4:10 | G              |                    | Baby playing on the ground                                                                                       |                 |            |
| 4:15 | M              |                    | Goes back into the house and bring out flask from the room                                                       |                 |            |
| 4:20 | M              |                    | Serving kunu into large cup from the flask                                                                       | Kunun dawa      |            |
| 4:25 | M              |                    | Serves a little quantity of kunu into smaller cup from the large cup                                             | Kunun dawa      |            |
| 4:25 | M              |                    | Adding MNP into smaller cup and mixing it with the kunu                                                          | MNP, kunun dawa |            |
| 4:30 | G              |                    | Pulling mother wrapper and waiting to be fed                                                                     |                 |            |
| 4:30 | M              | G                  | Feeding baby with the cup and keeping spoon aside                                                                | Kunun dawa      |            |
| 4:30 | G              |                    | Drinking the kunu with enthusiasm licking her lips and nodding sitting on the ground                             | Kunu dawa       |            |
| 4:31 | M              | G                  | Encouraging the baby while feeding her to finish the kunu                                                        | Kunun dawa      |            |
| 4:32 | M              | G                  | Feeding the baby with spoon                                                                                      | Kunun dawa      |            |
| 4:33 | M              | G                  | Carrying baby on her life still feeding the baby                                                                 | Kunun dawa      |            |
| 4:34 | M              | G                  | Still feeding the baby with spoon                                                                                | Kunun dawa      |            |
| 4:3  | G              |                    | Nodding and playing with her legs while taking the kunu. The baby drank the whole kunun that was mixed with MNP. | Kunun dawa      |            |
| 4:35 | M              | G                  | Giving the baby water to drink                                                                                   | Water           |            |
| 4:35 | M              | G                  | Washing the baby hands and mouth                                                                                 |                 |            |
| 4:40 | M              |                    | Washing the utensils used in feeding the baby                                                                    |                 |            |
| 4:45 | M              |                    | Carrying baby on her back                                                                                        |                 |            |
| 4:45 | M              |                    | Starting fire to boil water                                                                                      | water           |            |
| 4:50 | M              |                    | Starting fire to boil water                                                                                      | Water           |            |

| TIME | ACTOR INITIALS | RECIPIENT INITIALS | WHAT HAPPENED                                                                                                 | FOOD                   | Reactivity |
|------|----------------|--------------------|---------------------------------------------------------------------------------------------------------------|------------------------|------------|
| 4:55 | M              |                    | Mixing millet flour into boiling water to make meal                                                           | Millet flour meal      |            |
| 5:00 | M              |                    | Still adding millet flour into boiling water to make meal                                                     | Millet flour           |            |
| 5:05 | M              |                    | Still stirring the mixture                                                                                    | Millet flour water     |            |
| 5:10 | M              |                    | Meal is ready to be served                                                                                    | Millet meal            |            |
| 5:10 | M              |                    | Serving meal into two separate bowls                                                                          | Millet meal            |            |
| 5:15 | M              |                    | Washing the utensils used in preparing the meal                                                               |                        |            |
| 5:20 | M              |                    | Placing another pot on the fire to warm the soup. The soup was prepared earlier in the morning in our absence | Okro soup              |            |
| 5:25 | M              |                    | Dishing out the soup into another bowl                                                                        | Okro soup              |            |
| 5:30 | M              | G                  | Carrying baby on her back                                                                                     |                        |            |
| 5:35 | M              | G                  | Washing the baby's hand                                                                                       |                        |            |
| 5:40 | M              | G                  | Mother is feeding the child from her bowl while the baby is sitting on her lap                                | Millet meal, okro soup |            |
| 5:41 | M              | G                  | Mother is feeding the baby sitting on her lap                                                                 | Millet meal, okro soup |            |
| 5:42 | M              | G                  | Feeding the baby on her lap                                                                                   | Millet meal, okro soup |            |
| 5:43 | G              |                    | Baby is eating by herself                                                                                     | Millet meal, okro soup |            |
| 5:44 | G              |                    | Baby girl is eating by herself                                                                                | Millet meal,           |            |

[illegible]

[illegible]

| TIME | ACTOR INITIALS | RECIPIENT INITIALS | WHAT HAPPENED | FOOD | Reactivity |
|------|----------------|--------------------|---------------|------|------------|
|      |                |                    |               |      |            |
|      |                |                    |               |      |            |

PARTICIPANT ID: \_\_ \_\_\_\_\_

Primary Questions (Complete after you complete data collection):

From what you have seen observing THIS HOUSEHOLD, please answer the following questions in detail:

| Question                                                                                                                                                      | Write your <u>detailed</u> response here                                                                                                                                                                                                                                                                                                                                                           |
|---------------------------------------------------------------------------------------------------------------------------------------------------------------|----------------------------------------------------------------------------------------------------------------------------------------------------------------------------------------------------------------------------------------------------------------------------------------------------------------------------------------------------------------------------------------------------|
| <p>1. In this household, what would be the best way(s) to give nutritional supplements such as an MNP to young children to ensure compliance?</p> <p>Why?</p> | <p>The best way to ensure compliance is to educate and train the mother and grandmother on MNP.</p>                                                                                                                                                                                                                                                                                                |
| <p>2. In this household, who is favored during meal preparation or feeding?</p> <p>How is this favoritism expressed?</p>                                      | <p>The parents and older child are favored during meal preparation and feeding because the food prepared was in solid state and they had separate bowls each.</p> <p>The baby was fed carefully and diligently.</p>                                                                                                                                                                                |
| <p>3. How could we promote the MNP supplement for this family that would attract their attention?</p> <p>Who would they listen to?</p>                        | <p>MNP can be promoted to this household through the mother and the grandmother because the grandmother too was curious about the program, its benefits and how it will be used. I noticed that she has a say in the things that were going on in the household.</p> <p>It can also be promoted through the community leaders because the women were chatting on how he has encouraged them to</p> |

|                                                                                                                                                                |                                                                                                                                                                                                                                                                                                                                                   |
|----------------------------------------------------------------------------------------------------------------------------------------------------------------|---------------------------------------------------------------------------------------------------------------------------------------------------------------------------------------------------------------------------------------------------------------------------------------------------------------------------------------------------|
|                                                                                                                                                                | <p>accept such kind of help in the past to benefit themselves and their children.</p>                                                                                                                                                                                                                                                             |
| <p>4. In this household, what would be the best ways to promote the MNP but limit how much it would be shared?</p> <p>Why?</p>                                 | <p>The best way to limit MNP sharing in this household is to ensure that the mother understands that is meant for the child that is 6 - 23 months only and should be given separately.</p> <p>Also, the mother should ensure child she feed the child MNP before her meal or after and ensure the older child does not try to eat part of it.</p> |
| <p>5. What other issues and concerns did you see with this family that are important for us to consider with regard to introduction of an MNP?</p> <p>Why?</p> | <p>The food prepared later in the day was solid and cannot be used to administer MNP.</p> <p>The mother was in charge of feeding the child.</p>                                                                                                                                                                                                   |

|                                                                                                                                                                                                                        |                                                                                                                                                                                                                     |
|------------------------------------------------------------------------------------------------------------------------------------------------------------------------------------------------------------------------|---------------------------------------------------------------------------------------------------------------------------------------------------------------------------------------------------------------------|
| <p>6. Based on your experience observing this child today, do you believe reactivity negatively impacted your ability to see the food-related behaviors of the child?</p> <p>Please explain your answer in detail.</p> | <p>There was no reactivity during feeding because the mother said the child usually eats in the manner she ate.</p> <p>The child drank her kunu and ate the solid food with ease and ate mostly with her hands.</p> |
|------------------------------------------------------------------------------------------------------------------------------------------------------------------------------------------------------------------------|---------------------------------------------------------------------------------------------------------------------------------------------------------------------------------------------------------------------|
