# Supplementary material for: Acceptance and compliance with micronutrient powder (MNP) among children aged 6–23 months in northern Nigeria
Source: PLOS journal article supplement (doi:10.1371/journal.pgph.0000961), 2022-10-17
Supplement: S8 (10.1371/journal.pgph.0000961.s008) [file journal.pgph.0000961.s008]

## SPOT CHECK RECORDING FORM

State: Adamawa \_ song\_\_\_\_\_ Community: Ibolki\_

Name of caregiver (female):.....zainab ahmadu.....

Name of caregiver (male): .....ahmadu musa.....\_

Sex of index child: female\_\_ Age of index child (in months): 6month\_\_\_\_\_

### Spot Check Information

1. Date of MNP distribution to household (circle option below based on LGA name above):

 **Kebbi:** BirninKebbi&Jega LGA: **June 16**

 **Kebbi:** Danko-wasagu: **June 17**

 **Adamawa:** Song, Ganye: **June 18**

 **Adamawa:** Guyuk **June 19**

2. Date of Spot Check Observation: \_\_\_\_14/07/2015\_\_\_\_\_

3. Number of sachets remaining(Ask the caregiver to show you and count the specific number of sachets remaining):

35

4. Number of sachets that should remainusing one MNP sachet per day (Analyst only):

35

5. Number of sachets remaining / number of sachets should be remaining(Analyst only):

\_\_\_\_35/35\_\_\_\_\_ = \_\_\_\_100\_\_\_\_\_ %

Note

**The mother said she was given MNP on the 17<sup>th</sup> of June**

### **Probes**

**Question 1.** You have **XX** MNP sachets remaining. Explain how easy or difficult it was to use the MNP product on a daily basis for your child 6 – 23 months? (Circle one answer)

**Very Difficult**

**Difficult**

**Easy**

**Very Easy**

**Question 2.** Describe any specific challenges that you faced that made the MNP difficult to use on a daily basis?

Some days my child rejects the kunu mixed with the product so what I do is to force her to eat it. That is the only difficulties I encountered. But other days .she agrees to take the kunu without any problem

### **Question 3**

Pouring the MNP content into kunu and mixing it until it blends well is what I enjoy the most and my child does not throw up after I feed her with the product.

**Question 4.** What questions do you have about the MNP based on your experience using it?

I want to know if it is the product that makes my child to have a black diarrhea .after using this product for a week so, I start monitoring that from child

**Question 5.** What specific recommendations do you have that we can do as a program to make the MNP easier to use on a daily basis?

I would like the federal ministry of health to bring a product to use daily and a larger packet. my recommendation are just these two I have mentioned another thing is fine.
