# Supplementary material for: Acceptance and compliance with micronutrient powder (MNP) among children aged 6–23 months in northern Nigeria
Source: PLOS journal article supplement (doi:10.1371/journal.pgph.0000961), 2022-10-17
Supplement: S8 (10.1371/journal.pgph.0000961.s008) [file journal.pgph.0000961.s008]

# SPOT CHECK RECORDING FORM

State: Kebbi LGA: D/ wasagu Community: Kanya

Sex of index child: F Age of index child (in months):3

## Spot Check Information

1. Date of MNP distribution to household (circle option below based on LGA name above):

🚦 **Kebbi:** BirninKebbi&Jega LGA: **June 16**

🚦 **Kebbi:** Danko-wasagu: **June 17**

🚦 **Adamawa:**Song, Ganye: **June 18**

🚦 **Adamawa:**Guyuk **June 19**

2. Date of Spot Check Observation: 13/07/15

3. Number of sachets remaining(Ask the caregiver to show you and count the specific number of sachets remaining):

31

4. Number of sachets that should remainusing one MNP sachet per day (Analyst only):

5. Number of sachets remaining / number of sachets should be remaining(Analyst only):

\_\_\_\_\_ / \_\_\_\_\_ = \_\_\_\_\_ %

## Probes

**Question 1.** You have **XX** MNP sachets remaining. Explain how easy or difficult it was to use the MNP product on a daily basis for your child 6 – 23 months? (Circle one answer)

**Very Difficult**

**Difficult**

**Easy**

**Very Easy**

**Question 2.** Describe any specific challenges that you faced that made the MNP difficult to use on a daily basis?

NONE

**Question 3.** Describe specific aspects of the MNP product that you or your child enjoyed that made it easier to use on a daily basis?

As long as there is no sickness, I enjoy giving her

**Question 4.** What questions do you have about the MNP based on your experience using it?

**I don't have any question but the medicine is very effective because she can stand up on her own**

**Question 5.** What specific recommendations do you have that we can do as a program to make the MNP easier to use on a daily basis?

As for me, I really enjoy the medicine and I urge everybody using this medicine to use it properly
