# Supplementary material for: Acceptance and compliance with micronutrient powder (MNP) among children aged 6–23 months in northern Nigeria
Source: PLOS journal article supplement (doi:10.1371/journal.pgph.0000961), 2022-10-17
Supplement: S8 (10.1371/journal.pgph.0000961.s008) [file journal.pgph.0000961.s008]

### 1.1.1 Instrument F –Direct Observation Form

#### <<Instrument F Direct Observation Form>>

**PI Name:** PragmaMathema,Stephen Kodish

**Study Title:** Formative research to develop an infant and young child feeding (IYCF) intervention with micronutrient powder (MNP) for children aged 6 – 23 months

**PI Version/Date:** Version1.0/January 24, 2015

Date: 07/07/15Location: Hillinde

Data Collector: Amina Duniya

Main goals of this direct observation are to answer the following questions:

1. In this household, what would be the best way(s) to give nutritional supplements to young children? Why?
2. In this household, describe the food sharing that you observe throughout the meal. Are there any predictable patterns?
3. In this household, who is favored and how is this favoritism expressed during meal preparation and eating?

Household Composition Table (Fill out as you do data collection)

| INITIALS | SEX (M/F) | AGE (estimated) | Relationship to household | Description (not necessary)                                                                     |
|----------|-----------|-----------------|---------------------------|-------------------------------------------------------------------------------------------------|
| BM       | F         | 25years         | Mother                    | Slim and dark in complexion, wearing a bead on her neck and tying a multi colored wrapper       |
| GM       | F         | 50years         | Grandmother               | Smallish and dark in complexion, tying a blue lace wrapper and beads on her neck and right hand |
| SS       | F         | 3years          | Senior sister of BB       | Dark in complexion, wearing a green gown                                                        |
| BB       | M         | 19months        | Baby (index child)        | Dark and chubby, no cloth on his body, wearing a bead on his neck                               |
|          |           |                 |                           |                                                                                                 |
|          |           |                 |                           |                                                                                                 |
|          |           |                 |                           |                                                                                                 |

PARTICIPANT ID: \_\_\_\_\_

| TIME | ACTOR INITIALS | RECIPIENT INITIALS | WHAT HAPPENED                                               | FOOD          | Reactivity |
|------|----------------|--------------------|-------------------------------------------------------------|---------------|------------|
| 8:30 | BM             |                    | Pounding guinea in a mortar                                 |               |            |
|      | BB             |                    | Sitting on the floor close to BM and playing                |               |            |
| 8:40 | BB             |                    | Still playing                                               |               |            |
|      | BM             |                    | Still pounding                                              |               |            |
| 8:50 | BB             |                    | Starts crying                                               |               |            |
|      | BM             | BB                 | Picks him up and straps him to her back                     |               |            |
|      | BM             |                    | Continues pounding                                          |               |            |
| 9:00 | BM             |                    | Still pounding with BB strapped to her back                 |               |            |
| 9:05 | BB             |                    | Begins to cry                                               |               |            |
|      | BM             | BB                 | Brings him down and gives him food to eat                   | Tuwo and kuka |            |
| 9:10 | BM             |                    | Fetches water and washes the guinea corn                    |               |            |
| 9:20 | BM             |                    | Finished washing the guinea corn and begins to wash plate   |               |            |
|      | BB             |                    | Still eating                                                | Tuwo and kuka |            |
| 9:30 | SS             |                    | Comes in and tries to take BB's tuwo                        | Tuwo and kuka |            |
|      | BM             | SS                 | Stops her from eating BB's food and gives her kunu to drink |               |            |
| 9:40 | BB             |                    | Still eating                                                | Tuwo and kuka |            |
| 9:50 | BB             |                    | Stops eating and starts playing with food                   |               |            |

| TIME  | ACTOR INITIALS | RECIPIENT INITIALS | WHAT HAPPENED                                                  | FOOD         | Reactivity |
|-------|----------------|--------------------|----------------------------------------------------------------|--------------|------------|
| 9:55  | BB             |                    | Still playing with food                                        |              |            |
|       | BM             |                    | Washing dishes and looking at BB                               |              |            |
| 10:05 | BB             | BM                 | Gets tired of playing with food and gives BM the plate         |              |            |
| 10:15 | BM             | BB                 | Gives him water to drink                                       |              |            |
|       | BM             | BB                 | Washes his body with water                                     |              |            |
| 10:25 | BB             |                    | Begins to cry                                                  |              |            |
|       | BM             | BB                 | Brest feeds baby                                               | Brest milk   |            |
|       | BB             |                    | Finished breast feeding                                        |              |            |
| 10:30 | BB             |                    | Begins to drink kunu gero                                      | Kunun gero   |            |
| 10:40 | BB             |                    | Still drinking kunun gero                                      | Kunun gero   |            |
| 10:45 | BB             |                    | Finished drinking kunu                                         | Kunun gero   |            |
|       | BB             |                    | Begins to play with BM                                         |              |            |
| 10:50 | SS             | BB                 | Starts playing with BB                                         |              |            |
| 11:00 | SS             | BB                 | Still playing together                                         |              |            |
|       | BM             |                    | Talking with GM                                                |              |            |
| 11:05 | SS             | BB                 | Still playing together                                         |              |            |
| 11:10 | SS             |                    | Starts sleeping                                                |              |            |
| 11:15 | BB             |                    | Continues to play by himself                                   |              |            |
| 11:20 |                |                    | Still playing                                                  |              |            |
| 11:25 | BM             |                    | Opens up the MNP and pours into a little quantity of cold kunu | Kunu and MNP |            |

| TIME  | ACTOR INITIALS | RECIPIENT INITIALS | WHAT HAPPENED                                                  | FOOD                | Reactivity |
|-------|----------------|--------------------|----------------------------------------------------------------|---------------------|------------|
|       | BM             | BB                 | Gives it to BB to drink                                        | Kunu mixed with MNP |            |
|       | SS             | BB                 | Wakes up and sees baby drinking kunu and begs for some         | Kunu mixed with MNP |            |
|       | BB             |                    | Refuses to give to SS and continues drinking kunu              |                     |            |
|       | BM             | SS                 | Tells SS it is not meant for her                               |                     |            |
| 11:30 | BB             |                    | Finished drinking the kunu                                     |                     |            |
|       | SS             |                    | Picks up the plate and licks the remaining kunu from the plate |                     |            |
|       | BB             |                    | Continues to play                                              |                     |            |
| 11:40 | BB             |                    | Still playing                                                  |                     |            |
| 11:45 | BM             | BB                 | Breast feeds BB                                                | Breast milk         |            |
|       | BB             |                    | Starts sleeping                                                |                     |            |
| 11:50 | BB             |                    | Still sleeping                                                 |                     |            |
| 12:00 | BB             |                    | Still sleeping                                                 |                     |            |
| 12:05 | BB             |                    | Still sleeping                                                 |                     |            |
| 12:10 | BB             |                    | Still sleeping                                                 |                     |            |
|       | BM             |                    | Talking with GM                                                |                     |            |
| 12:20 | BB             |                    | Still sleeping                                                 |                     |            |
| 12:30 | BM             |                    | Joins baby and starts to sleep                                 |                     |            |
| 12:40 | BB             |                    | Still sleeping with BM                                         |                     |            |
| 12:50 | BB             |                    | Still sleeping with BM                                         |                     |            |

| TIME | ACTOR INITIALS | RECIPIENT INITIALS | WHAT HAPPENED                   | FOOD         | Reactivity                                           |
|------|----------------|--------------------|---------------------------------|--------------|------------------------------------------------------|
|      |                |                    |                                 |              |                                                      |
| 1:00 | BB             |                    | Still sleeping with BM          |              |                                                      |
| 1:10 | BB             |                    | Still sleeping with BM          |              |                                                      |
| 1:20 | BB             |                    | Still sleeping with BM          |              |                                                      |
| 1:25 | BB             |                    | Still sleeping with BM          |              |                                                      |
| 1:30 | BB             |                    | Still sleeping with BM          |              |                                                      |
| 1:35 | BM             |                    | Wakes up                        |              |                                                      |
| 1:40 | BB             |                    | Still sleeping                  |              |                                                      |
| 1:45 | BB             |                    | Still sleeping                  |              |                                                      |
|      | BM             |                    | Pounding guinea corn            |              |                                                      |
| 1:55 | BB             |                    | Still sleeping                  |              |                                                      |
|      | BB             |                    | Wakes up                        |              |                                                      |
| 2:00 | BM             | BB                 | Breast feeds BB                 | Breast milk  |                                                      |
| 2:05 | BB             |                    | Finished sucking                | Breast milk  |                                                      |
|      | BM             | BB                 | Plays with BB                   |              |                                                      |
| 2:10 | BM             | BB                 | Still playing together          |              |                                                      |
| 2:20 | BM             | BB                 | Gives him fura da nono to drink | Fura da nono | Giving him too much food and it doesn't seem natural |
| 2:25 | BB             |                    | Still drinking fura da nono     | Fura da nono |                                                      |
| 2:30 | BB             |                    | Still drinking fura da nono     | Fura da nono |                                                      |
|      | BB             |                    | Finishes and starts to play     |              |                                                      |

| TIME | ACTOR INITIALS | RECIPIENT INITIALS | WHAT HAPPENED                                      | FOOD           | Reactivity                       |
|------|----------------|--------------------|----------------------------------------------------|----------------|----------------------------------|
| 2:40 | BB             |                    | Still playing                                      |                |                                  |
| 2:45 | BB             |                    | Drinking fura da nono                              | Fura da nono   |                                  |
| 2:50 | BM             | BB                 | Washes him with water                              |                | This action doesn't seem natural |
| 2:55 | BM             | BB                 | Breast feed BB                                     | Breast milk    |                                  |
|      | BM             | BB                 | Finished breast feeding and starts playing with BB |                |                                  |
| 3:00 | SS             | BB                 | SS plays with BB                                   |                |                                  |
| 3:05 | BB             |                    | Still playing with SS                              |                |                                  |
| 3:10 | BB             |                    | Starts crying and BM picks him up                  |                |                                  |
|      | BM             | BB                 | Straps BB to her back                              |                |                                  |
| 3:15 | BM             |                    | Pounding guinea corn                               |                |                                  |
|      | BB             |                    | Strapped to BM's back                              |                |                                  |
| 3:20 | BM             | BB                 | Puts him on the floor to play                      |                |                                  |
| 3:30 | BB             |                    | Still playing                                      |                |                                  |
| 3:35 | BM             | BB                 | Gives him boiled moringa leaves to eat             | Moringa leaves |                                  |
| 3:40 | SS             | BB                 | Plays with BB                                      |                |                                  |
| 3:45 | SS             | BB                 | Still playing together                             |                |                                  |
| 3:50 | BB             |                    | Playing alone                                      |                |                                  |
| 3:55 | BM             | BB                 | Breast feeds him                                   | Breast milk    |                                  |
|      | BB             |                    | Finished sucking and starts playing                |                |                                  |
| 4:00 | BB             |                    | Still playing                                      |                |                                  |

| TIME | ACTOR INITIALS | RECIPIENT INITIALS | WHAT HAPPENED                   | FOOD        | Reactivity |
|------|----------------|--------------------|---------------------------------|-------------|------------|
| 4:05 | BB             |                    | Still playing                   |             |            |
| 4:10 | BB             | BM                 | Crawls to BM to breast feed him | Breast milk |            |
| 4:15 | BB             |                    | Still breast feeding            | Breast milk |            |
| 4:20 | BB             |                    | Starts playing                  |             |            |
|      | BM             |                    | Watching BB Play                |             |            |
|      |                |                    |                                 |             |            |
|      |                |                    |                                 |             |            |
|      |                |                    |                                 |             |            |
|      |                |                    |                                 |             |            |

Primary Questions (Complete after you complete data collection):

From what you have seen observing THIS HOUSEHOLD, please answer the following questions in detail:

| Question                                                                                                                                               | Write your <u>detailed</u> response here                                      |
|--------------------------------------------------------------------------------------------------------------------------------------------------------|-------------------------------------------------------------------------------|
| 1. In this household, what would be the best way(s) to give nutritional supplements such as an MNP to young children to ensure compliance?<br><br>Why? | It is the mother because she is actively involved in the feeding of the child |
| 2. In this household, who is favored during meal preparation or feeding?                                                                               | The baby is highly favored because the mother guides him during meal time     |

|                                                                                                                                                                |                                                                                                                                                                                       |
|----------------------------------------------------------------------------------------------------------------------------------------------------------------|---------------------------------------------------------------------------------------------------------------------------------------------------------------------------------------|
| How is this favoritism expressed?                                                                                                                              |                                                                                                                                                                                       |
| <p>3. How could we promote the MNP supplement for this family that would attract their attention?</p> <p>Who would they listen to?</p>                         | <p>By enlightening them about the benefits and what the child stands to gain when he is fed with the MNP</p> <p>The most effective person they will listen to is the village head</p> |
| <p>4. In this household, what would be the best ways to promote the MNP but limit how much it would be shared?</p> <p>Why?</p>                                 | <p>By telling the parent what the child stands to lose if another child that the product is not meant for takes it</p>                                                                |
| <p>5. What other issues and concerns did you see with this family that are important for us to consider with regard to introduction of an MNP?</p> <p>Why?</p> | <p>Because the mother always monitors his feeding</p>                                                                                                                                 |



|                                                                                                                                                                                                                        |                                                                                                     |
|------------------------------------------------------------------------------------------------------------------------------------------------------------------------------------------------------------------------|-----------------------------------------------------------------------------------------------------|
|                                                                                                                                                                                                                        |                                                                                                     |
| <p>6. Based on your experience observing this child today, do you believe reactivity negatively impacted your ability to see the food-related behaviors of the child?</p> <p>Please explain your answer in detail.</p> | <p>No I don't think so because the mother was just trying to show that she feeds her child well</p> |
