# Supplementary material for: Acceptance and compliance with micronutrient powder (MNP) among children aged 6–23 months in northern Nigeria
Source: PLOS journal article supplement (doi:10.1371/journal.pgph.0000961), 2022-10-17
Supplement: S8 (10.1371/journal.pgph.0000961.s008) [file journal.pgph.0000961.s008]

## SPOT CHECK RECORDING FORM

State: Adamawa LGA: \_\_\_\_Ganye\_\_\_\_ Community: \_Dadiri\_

Name of caregiver (female): Amina Shuaibu

Name or caregiver (male): .....

Sex of index child: \_Male\_\_\_\_ Age of index child (in months): \_1 8 months\_\_\_\_\_

### Spot Check Information

1. Date of MNP distribution to household (circle option below based on LGA name above):

🚦 **Kebbi:** BirninKebbi&Jega LGA: **June 16**

🚦 **Kebbi:** Danko-wasagu: **June 17**

🚦 **Adamawa:**Song, Ganye: **(June 18)**

🚦 **Adamawa:**Guyuk **June 19**

2. Date of Spot Check Observation: \_\_\_\_6/7/2015\_\_\_\_

3. Number of sachets remaining(Ask the caregiver to show you and count the specific number of sachets remaining):

41

4. Number of sachets that should remainusing one MNP sachet per day (Analyst only):

43

5. Number of sachets remaining / number of sachets should be remaining(Analyst only):

\_\_\_\_41\_\_\_\_ / \_\_\_\_43\_\_\_\_ = \_\_95.3\_\_ %

## **Probes**

**Question 1.** You have **XX** MNP sachets remaining. Explain how easy or difficult it was to use the MNP product on a daily basis for your child 6 – 23 months? (Circle one answer)

**Very Difficult**

**Difficult**

**(Easy)**

**Very Easy**

**Question 2.** Describe any specific challenges that you faced that made the MNP difficult to use on a daily basis?

The sachet is hard to unseal. Sometimes I have to use knife or my teeth to tear off the sachet.

**Question 3.** Describe specific aspects of the MNP product that you or your child enjoyed that made it easier to use on a daily basis?

- His appetite has increased.
- He used to be ill most of time but since I started giving him this MNP he is healthier.
- He had some rashes on his body before I started giving him MNP but it dried up in less than a week of giving him MNP
- He breastfeeds less than before taking the MNP because now he eats more

**Question 4.** What questions do you have about the MNP based on your experience using it?

- What will happen if I miss a day of administering the MNP?
- When are we getting more MNP?

**Question 5.** What specific recommendations do you have that we can do as a program to make the MNP easier to use on a daily basis?

We need more of the MNP because we have seen the benefit and when it is brought again there should be adequate enlightenment.
