# Supplementary material for: Acceptance and compliance with micronutrient powder (MNP) among children aged 6–23 months in northern Nigeria
Source: PLOS journal article supplement (doi:10.1371/journal.pgph.0000961), 2022-10-17
Supplement: S8 (10.1371/journal.pgph.0000961.s008) [file journal.pgph.0000961.s008]

### 1.1.1 Instrument F –Direct Observation Form

#### <<Instrument F Direct Observation Form>>

**PI Name:** PragmaMathema,Stephen Kodish

**Study Title:** Formative research to develop an infant and young child feeding (IYCF) intervention with micronutrient powder (MNP) for children aged 6 – 23 months

**PI Version/Date:** Version1.0/January 24, 2015

Date: \_\_18<sup>TH</sup> JUNE, 2015\_\_\_\_\_ Location: \_\_SONG L.G.A, ADAMAWA\_\_\_\_\_

Data Collector: \_\_ANTIYA SANDA\_\_\_\_\_ Participant ID: \_\_A HUT BY THE ROAD SIDE\_\_\_\_\_

Main goals of this direct observation are to answer the following questions:

1. In this household, what would be the best way(s) to give nutritional supplements to young children? Why?
2. In this household, describe the food sharing that you observe throughout the meal. Are there any predictable patterns?
3. In this household, who is favored and how is this favoritism expressed during meal preparation and eating?

(TEAR OFF AT PERFORATED DOTTED LINE BELOW)

-----

PARTICIPANT ID: \_\_\_\_\_

Household Composition Table (Fill out as you do data collection)

| INITIALS | SEX (M/F) | AGE (estimated) | Relationship to household | Description                         |
|----------|-----------|-----------------|---------------------------|-------------------------------------|
| PB       | M         | 35 YEARS        | HUSBAND                   | A TALL DARK MAN WITH A PURPLE SHIRT |
| FB       | F         | 32 YEARS        | WIFE                      | A FAT BLACK WOMAN                   |
| SB       | M         | 20 MONTHS       | CHILD                     | A SMALL BLACK BOY                   |
| FC       | M         | 4 YEARS         | CHILD                     | A LITTLE CHUBBY BABY                |
| SY       | F         | 8 YEARS         | CHILD                     | A SLIM GIRL WITH A YELLOW UNIFORM   |
| TY       | Y         | 6 YEARS         | CHILD                     | A TALL YELLOW GIRL                  |

|    |   |          |           |                   |
|----|---|----------|-----------|-------------------|
| SF | F | 30 YEARS | NEIGHBOUR | A SLIM FAIR WOMAN |
|    |   |          |           |                   |
|    |   |          |           |                   |
|    |   |          |           |                   |
|    |   |          |           |                   |
|    |   |          |           |                   |
|    |   |          |           |                   |
|    |   |          |           |                   |
|    |   |          |           |                   |

PARTICIPANT ID: \_\_\_\_\_

| TIME | ACTOR INITIALS | RECIPIENT INITIALS | WHAT HAPPENED      | FOOD | Reactivity |
|------|----------------|--------------------|--------------------|------|------------|
| 8:00 | FB             |                    | SWEEPING THE HOUSE |      |            |
| 8:05 | FB             |                    | SWEEPING THE HOUSE |      |            |
| 8:10 | FB             |                    | SWEEPING THE HOUSE |      |            |
| 8:15 | FB             |                    | WASHING THE PLATES |      |            |
| 8:20 | FB             |                    | WASHING THE PLATES |      |            |
| 8:25 | PB             |                    | WASHING HIS HANDS  |      |            |
| 8:30 | FB             | FC                 | BREAST FEEDING     |      |            |
| 8:40 | FB             | FC                 | BREAST FEEDING     |      |            |
| 8:45 | SB             |                    | LYING ON A MAT     |      |            |
| 8:50 | FB             |                    | BROUGHT FIRE WOOD  |      |            |

| TIME | ACTOR INITIALS | RECIPIENT INITIALS | WHAT HAPPENED                         | FOOD        | Reactivity |
|------|----------------|--------------------|---------------------------------------|-------------|------------|
| 9:00 | FB             |                    | BLOWING THE FIRE WOOD                 |             |            |
| 9:05 | FB             |                    | BLOWING THE FIRE WOOD                 |             |            |
| 9:10 | FB             |                    | PUT THE POT ON FIRE                   |             |            |
| 9:11 | FB             |                    | POUR WATER INTO THE POT ON FIRE       |             |            |
| 9:12 | FB             |                    | COVERS THE POT WITH THE COVER         |             |            |
| 9:13 | FB             |                    | CHECKED IF THE FIRE IS GLOWING        |             |            |
| 9:14 | FB             |                    | BROUGHT GUINEA CORN FLOUR             | GUINEA CORN |            |
| 9:15 | FB             |                    | MIXED WATER WITH GUINEA CORN FLOUR    | GUINEA CORN |            |
| 9:16 | FB             |                    | POUR THE PASTE INTO BOILING WATER     | GUINEA CORN |            |
| 9:17 | FB             |                    | STIR HOT WATER AND GUINEA CORN        | GUINEA CORN |            |
| 9:18 | FB             |                    | BROUGHT DOWN THE POT FROM THE FIRE    | GUINEA CORN |            |
| 9:19 | FB             |                    | POUR SOME KUNU PAP INTO A FLASK       | GUINEA CORN |            |
| 9:20 | FB             |                    | SERVES KUNU IN A SMALL CUP            | GUINEA CORN |            |
| 9:21 | FB             |                    | GIVES 2 CUPS OF KUNU TO BOTH CHILDREN | GUINEA CORN |            |
| 9:22 | SB             | SB                 | FEEDING HIMSELF WITH A CUP OF KUNU    | GUINEA CORN |            |
| 9:23 | SB             | SB                 | STILL DRINKING HIS KUNU               | GUINEA CORN |            |
| 9:24 | SB             | SB                 | FEEDING ON THE KUNU                   | GUINEA CORN |            |
| 9:25 | SB             | SB                 | FEEDING AND PLAYING                   | GUINEA CORN |            |
| 9:26 | SB             | SB                 | FEEDING AND PLAYING                   | GUINEA CORN |            |
| 9:27 | SB             | SB                 | FINISHES ALL HIS KUNU                 | GUINEA CORN |            |
| 9:28 | SB             |                    | LYING ON THE MAT                      |             |            |

| TIME  | ACTOR INITIALS | RECIPIENT INITIALS | WHAT HAPPENED                           | FOOD  | Reactivity |
|-------|----------------|--------------------|-----------------------------------------|-------|------------|
|       |                |                    |                                         |       |            |
| 9:29  | SG             | SG                 | DRINKING HER KUNU                       |       |            |
| 9:30  | SB             |                    | STARTS SLEEPING                         |       |            |
| 9:35  | SB             |                    | SLEEPING                                |       |            |
| 9:40  | SB             |                    | SLEEPING                                |       |            |
| 9:45  | SB             |                    | SLEEPING                                |       |            |
| 9:50  | SB             |                    | SLEEPING                                |       |            |
| 9:55  | SB             |                    | SLEEPING                                |       |            |
| 10:00 | SB             |                    | SLEEPING                                |       |            |
| 10:05 | SB             |                    | SLEEPING                                |       |            |
| 10:10 | SB             |                    | SLEEPING                                |       |            |
| 10:15 | SB             |                    | SLEEPING                                |       |            |
| 10:20 | SB             |                    | SLEEPING                                |       |            |
| 10:25 | SB             |                    | SLEEPING                                |       |            |
| 10:30 | SB             |                    | SLEEPING                                |       |            |
| 10:35 | SB             |                    | SLEEPING                                |       |            |
| 10:40 | SB             |                    | SLEEPING                                |       |            |
| 10:45 | SB             |                    | SLEEPING                                |       |            |
| 10:50 | SB             |                    | WAKES UP AND SAT DOWN                   |       |            |
| 10:55 | SB             |                    | TOOK A CUP AND FETCH WATER FROM THE POT |       |            |
| 11:00 | SB             | SB                 | DRINKING WATER                          | WATER |            |

| TIME  | ACTOR INITIALS | RECIPIENT INITIALS | WHAT HAPPENED                  | FOOD        | Reactivity |
|-------|----------------|--------------------|--------------------------------|-------------|------------|
| 11:05 | SB             |                    | GOES TO TOILET TO POOP         |             |            |
| 11:10 | SB             |                    | STILL IN THE TOILET            |             |            |
| 11:15 | SG             | SB                 | WASHES HIS ENTIRE BODY         |             |            |
| 11:20 | SG             | SB                 | STILL WASHING HIS BODY         |             |            |
| 11:25 | SB             |                    | STARTS PLAYING                 |             |            |
| 11:30 | SB             |                    | PLAYING WITH A TOY             |             |            |
| 11:35 | SB             |                    | PLAYING                        |             |            |
| 11:40 | SB             |                    | PLAYING                        |             |            |
| 11:45 | SB             |                    | TAKES A CUP TO FETCH WATER     |             |            |
| 11:50 | SB             | SB                 | DRINKING WATER                 | WATER       |            |
| 11:55 | SB             |                    | PLAYING                        |             |            |
| 12:00 | SB             |                    | PLAYING                        |             |            |
| 12:05 | SB             |                    | SITTING AND PLAYING            |             |            |
| 12:10 | SB             |                    | SITTING AND PLAYING            |             |            |
| 12:15 | SB             |                    | PLAYING IN THE COMPOUND        |             |            |
| 12:20 | SB             |                    | PLAYING IN THE COMPOUND        |             |            |
| 12:25 | SG             | SB                 | FEEDING HIM WITH POWDER MILK   | MILK POWDER |            |
| 12:30 | SG             | SB                 | FEEDING HIM WITH POWDERED MILK | MILK POWDER |            |
| 12:35 | SB             |                    | TAKES A CUP TO FETCH WATER     |             |            |
| 12:40 | SB             | SB                 | DRINKING WATER FROM A CUP      | WATER       |            |
| 12:45 | TY             | SB                 | BATHING HER BROTHER            |             |            |

| TIME  | ACTOR INITIALS | RECIPIENT INITIALS | WHAT HAPPENED                         | FOOD                        | Reactivity |
|-------|----------------|--------------------|---------------------------------------|-----------------------------|------------|
|       |                |                    |                                       |                             |            |
| 12:50 | TY             | SB                 | CLEANING HIS BODY WITH TOWEL          |                             |            |
| 12:55 | SB             |                    | STARTS PLAYING                        |                             |            |
| 1:00  | SB             |                    | PLAYING                               |                             |            |
| 1:05  | SB             |                    | STILL PLAYING                         |                             |            |
| 1:10  | SB             |                    | PLAYING IN THE COMPOUND               |                             |            |
| 1:15  | SF             |                    | BRINGS A BOWL WITH FOOD INSIDE        |                             |            |
| 1:20  | TY             | SB                 | FEEDING HIM WITH TUWO                 | MAIZE FLOUR                 |            |
| 1:25  | TY             | SB                 | EATING AND FEEDING HER BROTHER        | MAIZE FLOUR AND BOUBAB SOUP |            |
| 1:30  | SB             | SB                 | FEEDING HIMSELF WITH TUWO             | MAIZE FLOUR AND BOUBAB SOUP |            |
| 1:35  | SB             | SB                 | DRINKING WATER                        | WATER                       |            |
| 1:40  | SB             | SB                 | EATING THE TUWO ALONE                 | MAIZE FLOUR AND BOUBAB SOUP |            |
| 1:45  | SB             | SB                 | STILL HAND FEEDING HIMSELF            | MAIZE FLOUR AND BOUBAB SOUP |            |
| 1:50  | SB             |                    | GOES TO THE TOILET TO URINATE         |                             |            |
| 1:55  | PB             |                    | FETCHING WATER TO POUR INTO A BIG POT |                             |            |

| TIME | ACTOR INITIALS | RECIPIENT INITIALS | WHAT HAPPENED                     | FOOD   | Reactivity |
|------|----------------|--------------------|-----------------------------------|--------|------------|
| 2:00 | PB             | SB                 | WASHING THE HANDS OF HIS SON      |        |            |
| 2:05 | PB             | SB                 | BATHING HIS SON                   |        |            |
| 2:10 | PB             | SB                 | CONTINUED TO BATH HIM             |        |            |
| 2:15 | FB             |                    | WASHING ALL THE POTS              |        |            |
| 2:20 | FB             |                    | SWEEPING THE HOUSE                |        |            |
| 2:30 | FB             |                    | SWEEPING                          |        |            |
| 2:35 | SB             |                    | LYING ON A MAT                    |        |            |
| 2:40 | SB             |                    | STARTS TO SLEEP                   |        |            |
| 2:45 | SB             |                    | SLEEPING                          |        |            |
| 2:50 | SB             |                    | SLEEPING                          |        |            |
| 2:55 | SB             |                    | SLEEPING                          |        |            |
| 3:00 | SB             |                    | SLEEPING                          |        |            |
| 3:05 | TY             | SB                 | COVERS HER BROTHER WITH A WRAPPER |        |            |
| 3:10 | SB             |                    | SLEEPING                          |        |            |
| 3:15 | FB             |                    | POUNDING PEPPER                   | PEPPER |            |
| 3:16 | FB             |                    | POUNDING PEPPER                   | PEPPER |            |
| 3:17 | FB             |                    | PEELING ONIONS                    | ONION  |            |
| 3:18 | FB             |                    | PEELING ONIONS                    | ONION  |            |
| 3:19 | FB             |                    | MAKES FIRE                        |        |            |
| 3:20 | FB             |                    | BLOWING THE FIRE                  |        |            |

|      |        |  |                                    |                          |  |
|------|--------|--|------------------------------------|--------------------------|--|
| 3:21 | FB     |  | PUTS A POT ON THE FIRE             |                          |  |
| 3:22 | FB     |  | POUR GROUND NUT OIL INTO POT       | GROUNDNUT OIL            |  |
| 3:23 | FB     |  | POURS ONIONS INTO HOT OIL          | ONIONS AND GROUNDNUT OIL |  |
| 3:24 | FB     |  | POURS PEPPER INTO POT              | PEPPER                   |  |
| 3:25 | FB     |  | STIRS BOTH ONION AND PEPPER        | ONIONS AND PEPPER        |  |
| 3:26 | FB     |  | STILL FRYING THE ONIONS AND PEPPER | ONIONS AND PEPPER        |  |
| 3:27 | FB     |  | BROUGHT THE POT DOWN FROM FIRE     |                          |  |
| 3:28 | FB     |  | COVERS THE POT                     |                          |  |
| 3:29 | FB     |  | BRINGS MAIZE FLOUR                 | MAIZE FLOUR              |  |
| 3:30 | FB     |  | STARTS TO SIEVE THE MAIZE FLOUR    | MAIZE FLOUR              |  |
| 3:31 | FB     |  | SIEVING                            | MAIZE FLOUR              |  |
| 3:32 | FB     |  | SIEVING                            | MAIZE FLOUR              |  |
| 3:33 | FB     |  | SIEVING                            | MAIZE FLOUR              |  |
| 3:34 | FB     |  | SIEVEING                           | MAIZE FLOUR              |  |
| 3:35 | FB     |  | COVERED THE SIEVED FLOUR           | MAIZE FLOUR              |  |
| 3:40 | FB     |  | SITTING ON THE MAT                 |                          |  |
| 3:45 | SB     |  | WAKES FROM SLEEP                   |                          |  |
| 3:50 | SB     |  | FATCHES WATER TO DRINK             |                          |  |
| 3:55 | SB     |  | DRINKING WATER                     | WATER                    |  |
| 4:00 | FB, PB |  | BOTH FETCHING WATER FROM THE WELL  |                          |  |
| 4:05 | SB     |  | PLAYING WITH HIS TOY               |                          |  |
| 4:10 | SB     |  | PLAYING                            |                          |  |



|      |        |    |                             |       |  |
|------|--------|----|-----------------------------|-------|--|
|      |        |    |                             |       |  |
| 4:15 | SB, TY |    | PLAYING TOGETHER            |       |  |
| 4:20 | SB, TY |    | STILL PLAYING               |       |  |
| 4:25 | SB, TY |    | PLAYING                     |       |  |
| 4:30 | SB, TY |    | PLAYING                     |       |  |
| 4:35 | FB, SB |    | STILL ON THE SAME MAT       |       |  |
| 4:40 | FB     | FC | BREAST FEEDING HIM          |       |  |
| 4:50 | FB     | FC | BREAST FEEDING              |       |  |
| 4:55 | FB     | FC | BREAST FEEDING              |       |  |
| 5:00 | SB     |    | TAKES A CUP TO DRINK WATER  |       |  |
| 5:10 | SB     | SB | DRINKING WATER              | WATER |  |
| 5:15 | SB     |    | RUNNING ROUND THE COMPOUND  |       |  |
| 5:20 | SB     |    | PLAYING AROUND              |       |  |
| 5:30 | SB     |    | PLAYING AROUND              |       |  |
| 5:35 | SY, TY |    | FETCHUNG WATER FROM THE POT |       |  |
| 5:40 | SY, TY |    | WASHING THE PLATE TOGETHER  |       |  |
| 5:45 | SB     |    | SITTING ON A MAT            |       |  |
| 5:50 | FB     |    | REARRANGING THE FIRE WOOD   |       |  |
| 5:55 | SB, PB |    | SITTING TOGETHER ON A MAT   |       |  |
| 6:00 | FB     |    | BATHING HER YOUNG CHILD     |       |  |
|      |        |    |                             |       |  |
|      |        |    |                             |       |  |

[illegible]

[illegible]

[illegible]

[illegible]

[illegible]

[illegible]

[illegible]



[illegible]

|  |  |  |  |  |  |
|--|--|--|--|--|--|
|  |  |  |  |  |  |
|  |  |  |  |  |  |
|  |  |  |  |  |  |
|  |  |  |  |  |  |
|  |  |  |  |  |  |
|  |  |  |  |  |  |
|  |  |  |  |  |  |
|  |  |  |  |  |  |
|  |  |  |  |  |  |
|  |  |  |  |  |  |
|  |  |  |  |  |  |
|  |  |  |  |  |  |
|  |  |  |  |  |  |
|  |  |  |  |  |  |
|  |  |  |  |  |  |
|  |  |  |  |  |  |
|  |  |  |  |  |  |
|  |  |  |  |  |  |
|  |  |  |  |  |  |
|  |  |  |  |  |  |
|  |  |  |  |  |  |

PARTICIPANT ID: \_\_\_\_\_

Primary Questions (Complete after you complete data collection):

From what you have seen observing THIS HOUSEHOLD, please answer the following questions in detail:

| Question                                                                                                                                                      | Write your <u>detailed</u> response here |
|---------------------------------------------------------------------------------------------------------------------------------------------------------------|------------------------------------------|
| <p>1. In this household, what would be the best way(s) to give nutritional supplements such as an MNP to young children to ensure compliance?</p> <p>Why?</p> |                                          |
| <p>2. In this household, who is favored during meal preparation or feeding?</p> <p>How is this favoritism expressed?</p>                                      |                                          |
| <p>3. How could we promote the MNP supplement for this family that would attract their attention?</p> <p>Who would they listen to?</p>                        |                                          |
| <p>4. In this household, what would be the best ways to</p>                                                                                                   |                                          |

|                                                                                                                                                                                                                        |  |
|------------------------------------------------------------------------------------------------------------------------------------------------------------------------------------------------------------------------|--|
| <p>promote the MNP but limit how much it would be shared?</p> <p>Why?</p>                                                                                                                                              |  |
| <p>5. What other issues and concerns did you see with this family that are important for us to consider with regard to introduction of an MNP?</p> <p>Why?</p>                                                         |  |
| <p>6. Based on your experience observing this child today, do you believe reactivity negatively impacted your ability to see the food-related behaviors of the child?</p> <p>Please explain your answer in detail.</p> |  |
