# Supplementary material for: Acceptance and compliance with micronutrient powder (MNP) among children aged 6–23 months in northern Nigeria
Source: PLOS journal article supplement (doi:10.1371/journal.pgph.0000961), 2022-10-17
Supplement: S8 (10.1371/journal.pgph.0000961.s008) [file journal.pgph.0000961.s008]

### 1.1.1 Instrument F –Direct Observation Form

#### <<Instrument F Direct Observation Form>>

**PI Name:** PragmaMathema,Stephen Kodish

**Study Title:** Formative research to develop an infant and young child feeding (IYCF) intervention with micronutrient powder (MNP) for children aged 6 – 23 months

**PI Version/Date:** Version1.0/January 24, 2015

Date: \_July 05, 2015\_\_\_\_\_Location: \_Bongo community, LGA -Song

Data Collector: Antiya Sanda      Participant ID: A house by the road side

Main goals of this direct observation are to answer the following questions:

1. In this household, what would be the best way(s) to give nutritional supplements to young children? Why?
2. In this household, describe the food sharing that you observe throughout the meal. Are there any predictable patterns?
3. In this household, who is favored and how is this favoritism expressed during meal preparation and eating?

(TEAR OFF AT PERFORATED DOTTED LINE BELOW)

-----

PARTICIPANT ID: \_\_\_\_

Household Composition Table (Fill out as you do data collection)

| INITIALS | SEX<br>(M/F) | AGE<br>(estimated) | Relationship to<br>household | Description                           |
|----------|--------------|--------------------|------------------------------|---------------------------------------|
| FB       | F            | 31 YRS             | Mother                       | A fat black woman.                    |
| SB       | F            | 22<br>MONTHS       | Child (observed<br>child)    | A small black baby.                   |
| ST       | M            | 35 Yrs             | Father                       | A slim tall man wearing a green shirt |
| FS       | F            | 4 Yrs              | daughter                     | A fair slim female child              |
| TS       | F            | 8 Yrs              | Daughter                     | A tall slim girl                      |
|          |              |                    |                              |                                       |
|          |              |                    |                              |                                       |
|          |              |                    |                              |                                       |
|          |              |                    |                              |                                       |
|          |              |                    |                              |                                       |

|  |  |  |  |  |
|--|--|--|--|--|
|  |  |  |  |  |
|  |  |  |  |  |
|  |  |  |  |  |
|  |  |  |  |  |
|  |  |  |  |  |

PARTICIPANT ID: \_\_\_\_\_

| TIME | ACTOR INITIALS | RECIPIENT INITIALS | WHAT HAPPENED                                       | FOOD        | Reactivity |
|------|----------------|--------------------|-----------------------------------------------------|-------------|------------|
| 8:00 | FB             |                    | Fetching water                                      |             |            |
| 8:05 | FB             |                    | Fetching water from the water pot                   |             |            |
| 8:10 | FB             |                    | Carry firewood                                      |             |            |
| 8:15 | FB             |                    | Sitting on the mat                                  |             |            |
| 8:20 | FB             |                    | Bring dirty plats from the kitchen                  |             |            |
| 8:25 | FB             |                    | Gathers all the dirty plates together in a big bowl |             |            |
| 8:30 | FB             |                    | Start fetching water in a big bucket                |             |            |
| 8:35 | FB             |                    | Start washing the plates                            |             |            |
| 8:40 | FB             |                    | Washing the plates                                  |             |            |
| 8:45 | FB             |                    | Washing the plates                                  |             |            |
| 8:50 | FB             |                    | Washing the plates                                  |             |            |
| 8:55 | FB             |                    | Washing the plates                                  |             |            |
| 9:00 | FB             |                    | Start making fire                                   |             |            |
| 9:05 | FB             |                    | Making fire                                         |             |            |
| 9:10 | FB             |                    | Fetches water in a pot                              |             |            |
| 9:15 | FB             |                    | Puts pot on the fire                                |             |            |
| 9:20 | FB             |                    | Covers the pot                                      |             |            |
| 9:25 | FB             |                    | Bring guinea corn                                   | Guinea corn |            |
| 9:30 | FB             |                    | Pour guinea corn flour into the cup                 | Guinea corn |            |

| TIME  | ACTOR INITIALS | RECIPIENT INITIALS | WHAT HAPPENED                                                | FOOD                            | Reactivity |
|-------|----------------|--------------------|--------------------------------------------------------------|---------------------------------|------------|
| 9:35  | FB             |                    | Pour little water into the guinea corn flour                 |                                 |            |
| 9:40  | FB             |                    | Start mixing guinea corn flour                               | Guinea corn and water           |            |
| 9:45  | FB             |                    | Opens the pot on the fire and poured the mixed paste into it | Guinea corn                     |            |
| 9:50  | FB             |                    | Use a stick to stir the mixture on the fire                  |                                 |            |
| 9:55  | FB             |                    | Adds groundnut paste into the mixture on fire                | Guinea corn and groundnut paste |            |
| 10:00 | SB             |                    | Start crying                                                 |                                 |            |
| 10:05 | FB             |                    | Blowing the fire                                             |                                 |            |
| 10:10 | FB             | SB                 | Carry her brother on her arms                                |                                 |            |
| 10:15 | FB             |                    | Making kunu                                                  |                                 |            |
| 10:20 | FB             |                    | Bring down the pot from the fire                             | Guinea corn                     |            |
| 10:25 | FB             |                    | Remove the mixing stick                                      |                                 |            |
| 10:30 | FB             |                    | Bring two cups                                               |                                 |            |
| 10:35 | FB             |                    | Pours kunu into the two cups                                 | Guinea corn                     |            |
| 10:40 | FB             |                    | Pouring kunu into the cups                                   |                                 |            |
| 10:45 | TS             |                    | Bring her cup                                                |                                 |            |
| 10:50 | FB             |                    | Shares all the kunu into three cups                          | Kunu dawa                       |            |
| 10:55 | FB             |                    | Removes all the firewood                                     |                                 |            |
| 11:00 | SB             |                    | Comes to carry his cup of kunu                               | Guinea corn                     |            |
| 11:05 | FB             | SB                 | Carry the baby and cup of kunu                               |                                 |            |
| 11:10 | FS, TS         |                    | Comes and pick their cups of kunu                            |                                 |            |
| 11:15 | FB             | SB                 | Goes into the room while carrying her son                    |                                 |            |
| 11:20 | FB             | SB                 | Comes out of the room with 1 sachet of MNP                   |                                 |            |
| 11:25 | FB             | SB                 | Keep her child on the mat                                    |                                 |            |

| TIME  | ACTOR INITIALS | RECIPIENT INITIALS | WHAT HAPPENED                                              | FOOD           | Reactivity |
|-------|----------------|--------------------|------------------------------------------------------------|----------------|------------|
| 11:30 | FB             |                    | Start unsealing MNP                                        |                |            |
| 11:30 | FB             |                    | Taste the kunu to know if it is cold                       | Kunu dawa      |            |
| 11:35 | FB             |                    | Pour MNP into the kunu                                     | MNP, Kunu dawa |            |
| 11:40 | FB             |                    | Stirs the MNP and kunu together                            | Kunu dawa, MNP |            |
| 11:45 | FB             |                    | Serving kunu from flask into a cup.                        | Kunun          |            |
| 11:55 | FB             |                    | Use a spoon to taste it                                    | Kunun dawa     |            |
| 12:00 | FB             | SB                 | Carry her child on the lap                                 |                |            |
| 12:05 | FB             | SB                 | Start feeding the child with MNP mixed kunu                | Kunu dawa      |            |
| 12:10 | FB             | SB                 | Feeding her child                                          | Kunu dawa      |            |
| 12:15 | FB             | SB                 | Feeding her child                                          | Kunu dawa      |            |
| 12:20 | FB             | SB                 | Feeding her child                                          | Kunu dawa      |            |
| 12:25 | FB             | SB                 | Feeding her child                                          | Kunu dawa      |            |
| 12:30 | FB             | SB                 | Feeding her child                                          | Kunu dawa      |            |
| 12:35 | FB             | SB                 | Feeding her child                                          | Kunu dawa      |            |
| 12:40 | FB             | SB                 | Feeding her child                                          | Kunu dawa      |            |
| 12:45 | SB             |                    | Start feeding himself with the small quantity of kunu left |                |            |
| 12:50 | SB             |                    | Finish the kunu and keep the empty cup on the ground       |                |            |
| 1:00  | SB             |                    | Start playing with the empty cup of kunu                   |                |            |
| 1:05  | SB             |                    | Lying on the mat                                           |                |            |
| 1:10  | FB             |                    | Collect the empty cup to rinse it                          |                |            |
| 1:15  | FB             |                    | Fetches water in a cup                                     |                |            |

| TIME | ACTOR INITIALS | RECIPIENT INITIALS | WHAT HAPPENED                                           | FOOD    | Reactivity |
|------|----------------|--------------------|---------------------------------------------------------|---------|------------|
| 1:20 | FB             |                    | Uses the water in the cup to wash the face of her child |         |            |
| 1:25 | FB             |                    | Picks a broom                                           |         |            |
| 1:30 | FB             |                    | Start sweeping                                          |         |            |
| 1:35 | SB             |                    | Playing on the mat                                      |         |            |
| 1:40 | FB             |                    | Sweeping                                                |         |            |
| 1:45 | FB             |                    | Sweeping                                                |         |            |
| 1:50 | FB             |                    | Sweeping the compound                                   |         |            |
| 1:55 | FB             |                    | Sweeping the compound                                   |         |            |
| 2:00 | FB             |                    | Chops the broom                                         |         |            |
| 2:05 | SB             |                    | Start sleeping                                          |         |            |
| 2:10 | SB             |                    | Sleeping                                                |         |            |
| 2:15 | SB             |                    | Sleeping                                                |         |            |
| 2:20 | SB             |                    | Sleeping                                                |         |            |
| 2:25 | SB             |                    | Sleeping                                                |         |            |
| 2:30 | SB             |                    | Sleeping                                                |         |            |
| 2:35 | SB             |                    | Sleeping                                                |         |            |
| 2:40 | SB             |                    | Sleeping                                                |         |            |
| 2:45 | SB             |                    | Sleeping                                                |         |            |
| 2:50 | SB             |                    | Sleeping                                                |         |            |
| 2:55 | FB             |                    | Sitting next to her child                               |         |            |
| 3:00 | TS             | FB                 | Gives her mum the leaf                                  | Spinach |            |
| 3:10 | FB             |                    | Collect the leaf                                        |         |            |
| 3:15 | TS             |                    | Bring a big bowl to the mom                             |         |            |

| TIME | ACTOR INITIALS | RECIPIENT INITIALS | WHAT HAPPENED                       | FOOD                     | Reactivity |
|------|----------------|--------------------|-------------------------------------|--------------------------|------------|
| 3:20 | TS             |                    | Bring knife also                    |                          |            |
| 3:25 | FB             |                    | Start picking the leaves            | Spinach                  |            |
| 3:30 | FB             |                    | Picking the green leaves            | Spinach                  |            |
| 3:35 | FB             |                    | Picking the green leaves            | Spinach                  |            |
| 3:40 | FB             |                    | Picking the green leaves            | spinach                  |            |
| 3:45 | FB             |                    | Picking the green leaves            | spinach                  |            |
| 3:50 | FB             |                    | Picking the green leaves            | spinach                  |            |
| 3:55 | FB             |                    | Picking the green leaves            | spinach                  |            |
| 4:00 | FB             |                    | Cutting the green leaves with knife | spinach                  |            |
| 4:05 | FB             |                    | Cutting the green leaves with knife | spinach                  |            |
| 4:10 | FB             |                    | Cutting the green leaves with knife | spinach                  |            |
| 4:15 | FB             |                    | Cutting the green leaves with knife | spinach                  |            |
| 4:20 | FB             |                    | Cutting the green leaves with knife | spinach                  |            |
| 4:25 | FB             |                    | Goes into the kitchen               |                          |            |
| 4:30 | FB             |                    | Brings tuwo in a plate with soup    | Maize meal and okro      |            |
| 4:35 | FB             |                    | Calls all her children to eat       |                          |            |
| 4:40 | SB,FS          |                    | Eating together                     | Maize meal and okro soup |            |
| 4:45 | SB,FS          |                    | Eating together tuwo masara         | Maize meal and okro soup |            |
| 4:50 | SB,FS          |                    | Eating together                     | Maize meal and okro soup |            |
| 4:55 | Ts             |                    | Comes in and join them to eat       | Maize an okro soup       |            |
| 5:00 | SB,FS,         |                    | Eating together and playing         | Maize                    |            |

[illegible]

[illegible]



| TIME | ACTOR INITIALS | RECIPIENT INITIALS | WHAT HAPPENED | FOOD | Reactivity |
|------|----------------|--------------------|---------------|------|------------|
|      |                |                    |               |      |            |
|      |                |                    |               |      |            |
|      |                |                    |               |      |            |
|      |                |                    |               |      |            |
|      |                |                    |               |      |            |
|      |                |                    |               |      |            |
|      |                |                    |               |      |            |
|      |                |                    |               |      |            |
|      |                |                    |               |      |            |
|      |                |                    |               |      |            |

PARTICIPANT ID: \_\_

Primary Questions (Complete after you complete data collection):

From what you have seen observing THIS HOUSEHOLD, please answer the following questions in detail:

| Question                                                                                                                                                      | Write your <u>detailed</u> response here                                                                                                                                                                                                                    |
|---------------------------------------------------------------------------------------------------------------------------------------------------------------|-------------------------------------------------------------------------------------------------------------------------------------------------------------------------------------------------------------------------------------------------------------|
| <p>1. In this household, what would be the best way(s) to give nutritional supplements such as an MNP to young children to ensure compliance?</p> <p>Why?</p> | <p>The best way and time to give the MNP should be in the morning because that is when children are fed with semi solid food.</p> <p>Because kunu (pap) is usually prepared for young children in the morning , all other foods are usually solid foods</p> |
| <p>2. In this household, who is favored during meal preparation or feeding?</p>                                                                               | <p>Nobody is favored during feeding because all the young children gather to eat except in the morning when every child has a separate cup for kunu.</p>                                                                                                    |

|                                                                                                                                                         |                                                                                                                                                                                                                                                                                                                  |
|---------------------------------------------------------------------------------------------------------------------------------------------------------|------------------------------------------------------------------------------------------------------------------------------------------------------------------------------------------------------------------------------------------------------------------------------------------------------------------|
| How is this favoritism expressed?                                                                                                                       | All the children are served the same quantity of either kunu or solid foods that they all ate together                                                                                                                                                                                                           |
| 3. How could we promote the MNP supplement for this family that would attract their attention?<br><br>Who would they listen to?                         | MNP can be promoted to this family through the mother because she is the person in charge of meal preparation and feeding.<br><br>They would listen to the mother because she is the one that is responsible for their upbringing and also their welfare.                                                        |
| 4. In this household, what would be the best ways to promote the MNP but limit how much it would be shared?<br><br>Why?                                 | The best way would be through the mother and the possibility that the MNP would be shared is limited.<br><br>Because every child has a separate cup for kunu in the morning that makes it easy for the mother to quickly pour the MNP without the other children notice.                                         |
| 5. What other issues and concerns did you see with this family that are important for us to consider with regard to introduction of an MNP?<br><br>Why? | The general hygiene of this household is very poor , the children do not wash their hands before eating and the mother leaves the food items open to flies.<br>The young child is not given necessary care and attention. The only time he gets the mother's attention is when it is time to mixed MNP and kunu. |
| 6. Based on your experience observing this child today, do you believe reactivity negatively impacted your ability to see the food-related              | No, the mother and other children are used to me already. They are more relaxed.<br><br>There was no reactivity.                                                                                                                                                                                                 |

|                                                                             |  |
|-----------------------------------------------------------------------------|--|
| <p>behaviors of the child?</p> <p>Please explain your answer in detail.</p> |  |
|-----------------------------------------------------------------------------|--|
