# Supplementary material for: Acceptance and compliance with micronutrient powder (MNP) among children aged 6–23 months in northern Nigeria
Source: PLOS journal article supplement (doi:10.1371/journal.pgph.0000961), 2022-10-17
Supplement: S8 (10.1371/journal.pgph.0000961.s008) [file journal.pgph.0000961.s008]

## SPOT CHECK RECORDING FORM

State: Kebbi LGA: Birnin Kebbi Community: Nufawa

Name of caregiver (female): Salamatu Sani

Name of caregiver (male): Sani Taila

Sex of index child: F Age of index child (in months): 20months

### Spot Check Information

1. Date of MNP distribution to household (circle option below based on LGA name above):

🚦 **Kebbi:** Birnin Kebbi & Jega LGA: **June 16**

🚦 **Kebbi:** Danko-wasagu: **June 17**

🚦 **Adamawa:** Song, Ganye: **June 18**

🚦 **Adamawa:** Guyuk **June 19**

2. Date of Spot Check Observation: 01/07/15

3. Number of sachets remaining (Ask the caregiver to show you and count the specific number of sachets remaining):

48

4. Number of sachets that should remain using one MNP sachet per day (Analyst only):

46

5. Number of sachets remaining / number of sachets should be remaining (Analyst only):

\_\_\_\_\_48\_\_\_\_\_ / \_\_\_\_\_46\_\_\_\_\_ = \_\_\_\_\_104.3\_\_\_\_\_ %

## **Probes**

**Question 1.** You have **XX** MNP sachets remaining. Explain how easy or difficult it was to use the MNP product on a daily basis for your child 6 – 23 months? (Circle one answer)

**Very Difficult**

**Difficult**

**Easy**

**Very Easy**

**Question 2.** Describe any specific challenges that you faced that made the MNP difficult to use on a daily basis?

There is no challenge in using it everyday

**Question 3.** Describe specific aspects of the MNP product that you or your child enjoyed that made it easier to use on a daily basis?

The colour it gives makes it quite easier because the girl likes the colour (light yellow)

**Question 4.** What questions do you have about the MNP based on your experience using it?

If one delays the administering of the MNP that is if one supposes to give it in the morning but delayed till evening, does it have any negative effect?

**Question 5.** What specific recommendations do you have that we can do as a program to make the MNP easier to use on a daily basis?

It will be more appropriate to administer it in the morning since that is when most children take kunu
