# Supplementary material for: Acceptance and compliance with micronutrient powder (MNP) among children aged 6–23 months in northern Nigeria
Source: PLOS journal article supplement (doi:10.1371/journal.pgph.0000961), 2022-10-17
Supplement: S8 (10.1371/journal.pgph.0000961.s008) [file journal.pgph.0000961.s008]

## SPOT CHECK RECORDING FORM

**State: Kebbi LGA: Birnin Kebbi Community: Gorun Chindo**

**Name of caregiver (female): Rabi**

**Name of caregiver (male): Aliyu**

**Sex of index child: M Age of index child (in months): 12months**

### Spot Check Information

**1. Date of MNP distribution to household** (circle option below based on LGA name above):

 **Kebbi:** Birnin Kebbi & Jega LGA: **June 16**

 **Kebbi:** Danko-wasagu: **June 17**

 **Adamawa:** Song, Ganye: **June 18**

 **Adamawa:** Guyuk **June 19**

**2. Date of Spot Check Observation: 02/07/15**

**3. Number of sachets remaining**(Ask the caregiver to show you and count the specific number of sachets remaining):

43

**4. Number of sachets that should remain using one MNP sachet per day** (Analyst only):

45

**5. Number of sachets remaining / number of sachets should be remaining**(Analyst only):

43 / 45 = 95.6 %

### Probes

**Question 1.** You have **XX** MNP sachets remaining. Explain how easy or difficult it was to use the MNP product on a daily basis for your child 6 – 23 months? (Circle one answer)

**Very Difficult**

**Difficult**

**Easy**

**Very Easy**

**Question 2.** Describe any specific challenges that you faced that made the MNP difficult to use on a daily basis?

There was no challenge that I faced like I told you earlier on. Nothing at all

**Question 3.** Describe specific aspects of the MNP product that you or your child enjoyed that made it easier to use on a daily basis?

It was easy to store it because of the size. The child did not noticed any difference, so he ate it well and it has increased his appetite

**Question 4.** What questions do you have about the MNP based on your experience using it?

I do not have any question at all

**Question 5.** What specific recommendations do you have that we can do as a program to make the MNP easier to use on a daily basis?

I don't know, you should ask my husband and the village head
