# Supplementary material for: Acceptance and compliance with micronutrient powder (MNP) among children aged 6–23 months in northern Nigeria
Source: PLOS journal article supplement (doi:10.1371/journal.pgph.0000961), 2022-10-17
Supplement: S8 (10.1371/journal.pgph.0000961.s008) [file journal.pgph.0000961.s008]

### 1.1.1 Instrument F –Direct Observation Form

#### <<Instrument F Direct Observation Form>>

**PI Name:** PragmaMathema,Stephen Kodish

**Study Title:** Formative research to develop an infant and young child feeding (IYCF) intervention with micronutrient powder (MNP) for children aged 6 – 23 months

**PI Version/Date:** Version1.0/January 24, 2015

Date: \_June 23, 2015\_\_\_\_\_Location: \_ Ganye 2 community,GANYE, LGA\_\_\_\_\_

Data Collector: Antiya Sanda\_\_\_\_Participant ID: \_A house near a forest

Main goals of this direct observation are to answer the following questions:

1. In this household, what would be the best way(s) to give nutritional supplements to young children? Why?
2. In this household, describe the food sharing that you observe throughout the meal. Are there any predictable patterns?
3. In this household, who is favored and how is this favoritism expressed during meal preparation and eating?

(TEAR OFF AT PERFORATED DOTTED LINE BELOW)

-----

PARTICIPANT ID: \_\_\_\_

Household Composition Table (Fill out as you do data collection)

| INITIALS | SEX<br>(M/F) | AGE<br>(estimated) | Relationship to<br>household | Description                                   |
|----------|--------------|--------------------|------------------------------|-----------------------------------------------|
| TB       | F            | 29yrs              | Mother                       | A tall slim woman in her late 20's            |
| SM       | M            | 7 months           | Baby boy                     | A small baby boy                              |
| TG       | F            | 16 yrs             | Cousin                       | A teenage girl , she's the cousin of the wife |
| BS       | M            | 32 yrs             | Father                       | A black short man wearing black suit          |
| BY       | M            | 25 yrs             | Neighbour                    | A black young dude wearing a black jacket     |
| TS       | F            | 10 yrs             | Neighbour                    | A tall slim girl from the neighbouring house  |
|          |              |                    |                              |                                               |
|          |              |                    |                              |                                               |

|  |  |  |  |  |
|--|--|--|--|--|
|  |  |  |  |  |
|  |  |  |  |  |
|  |  |  |  |  |
|  |  |  |  |  |
|  |  |  |  |  |
|  |  |  |  |  |
|  |  |  |  |  |
|  |  |  |  |  |

PARTICIPANT ID: \_\_\_\_\_

| TIME  | ACTOR INITIALS | RECIPIENT INITIALS | WHAT HAPPENED               | FOOD        | Reactivity |
|-------|----------------|--------------------|-----------------------------|-------------|------------|
| 8:00  | SM             |                    | Sleeping                    |             |            |
| 8:05  | SM             |                    | Sleeping                    |             |            |
| 8:05  | SM             |                    | Sleeping                    |             |            |
| 8:10  | SM             |                    | Sleeping                    |             |            |
| 8:15  | SM             |                    | Sleeping                    |             |            |
| 8:20  | SM             |                    | Sleeping                    |             |            |
| 8:25  | SM             |                    | Sleeping                    |             |            |
| 8:30  | SM             |                    | Sleeping                    |             |            |
| 8:35  | SM             |                    | Sleeping                    |             |            |
| 8:40  | SM             |                    | Wakes from sleep and crying |             |            |
| 08:45 | SM             |                    | Crying                      |             |            |
| 08:50 | TB             | SM                 | Breastfeeding               | Breast milk |            |
| 08:55 | TB             | SM                 | Breastfeeding               | Breast milk |            |
| 09:00 | TB             | SM                 | Breastfeeding               | Breast milk |            |
| 09:05 | TB             | SM                 | Breastfeeding               | Breast milk |            |

| TIME  | ACTOR INITIALS | RECIPIENT INITIALS | WHAT HAPPENED                            | FOOD        | Reactivity |
|-------|----------------|--------------------|------------------------------------------|-------------|------------|
| 09:10 | TB             | SM                 | Breastfeeding                            | Breast milk |            |
| 09:15 | TB             | SM                 | Breastfeeding                            | Breast milk |            |
| 09:20 | TB             | SM                 | Breastfeeding                            | Breast milk |            |
| 09:25 | TB             | SM                 | Carry her child on the back              |             |            |
| 09:30 | TB             | SM                 | Carry her child on the back              |             |            |
| 09:35 | TB             |                    | Brings two flax from outside             |             |            |
| 09:40 | TB             | SM                 | Still carrying her child on the back     |             |            |
| 09:45 | TB             | SM                 | Trying to put her child to sleep         |             |            |
| 09:55 | SM             |                    | Still crying                             |             |            |
| 10:00 | SM             |                    | Start sleeping                           |             |            |
| 10:05 | TB             |                    | Lay her child on the bed                 |             |            |
| 10:10 | TB             |                    | Starts sweeping the compound             |             |            |
| 10:15 | TB             |                    | Continues with sweeping                  |             |            |
| 10:20 | TB             |                    | Sweeping                                 |             |            |
| 10:25 | TB             |                    | Starts washing some dirty plates         |             |            |
| 10:30 | TB             |                    | Washing plates                           |             |            |
| 10:35 | TB             |                    | Washing plates                           |             |            |
| 10:40 | TB             |                    | Start rinsing the plates                 |             |            |
| 10:45 | TB             |                    | Rinsing the plates                       |             |            |
| 10:50 | TB             |                    | Rinsing the plates                       |             |            |
| 10:55 | TB             |                    | Rinsing some big bowls                   |             |            |
| 11:00 | TB             |                    | Rinsing some big bowls                   |             |            |
| 11:05 | TB             |                    | Start fetching water                     |             |            |
| 11:10 | TB             |                    | Fetching water                           |             |            |
| 11:15 | TB             |                    | Start sweeping the entire house          |             |            |
| 11:20 | TB             |                    | Continues to sweep the house             |             |            |
| 11:25 | TB             |                    | Start rinsing water pot cover            |             |            |
| 11:25 | TB             |                    | Rinsing water pot cover                  |             |            |
| 11:30 | TB             |                    | Brings her child's dirty clothes outside |             |            |
| 11:35 | TB             |                    | Brings detergent outside                 |             |            |
| 11:40 | TB             |                    | Starts washing her child's dirty         |             |            |

| TIME  | ACTOR INITIALS | RECIPIENT INITIALS | WHAT HAPPENED                                                                                       | FOOD        | Reactivity |
|-------|----------------|--------------------|-----------------------------------------------------------------------------------------------------|-------------|------------|
|       |                |                    | clothes with the detergent                                                                          |             |            |
| 11:45 | TB             |                    | Washing her child's clothes                                                                         |             |            |
| 11:50 | TB             |                    | Washing her child's clothes                                                                         |             |            |
| 11:55 | TB             |                    | Start rinsing the baby's clothes                                                                    |             |            |
| 12:00 | TB             |                    | Rinsing the baby's clothes                                                                          |             |            |
| 12:05 | TB             |                    | Starts drying the baby's clothes on the dryer                                                       |             |            |
| 12:10 | TB             |                    | Drying her baby's clothes on the dryer                                                              |             |            |
| 12:15 | TB             |                    | Brings her child from the room                                                                      |             |            |
| 12:20 | TB             | SM                 | Start breastfeeding baby                                                                            | Breast milk |            |
| 12:25 | TB             | SM                 | Breast feeding baby                                                                                 | Breast milk |            |
| 12:30 | SM             |                    | Starts crying                                                                                       |             |            |
| 12:35 | TB             | SM                 | Carry her child on the back                                                                         |             |            |
| 12:40 | BS             |                    | Walks in with a can of palm oil                                                                     | Palm oil    |            |
| 12:45 | BS             |                    | Picks a hoe and leaves for the farm, it rained all through the morning so he couldn't leave earlier |             |            |
| 12:46 | TB             |                    | Brings a hot water flask                                                                            | Water       |            |
| 12:47 | TB             |                    | Brings a bottle of water                                                                            | Water       |            |
| 12:48 | TB             |                    | Brings a cup and spoon                                                                              |             |            |
| 12:49 | TB             |                    | Brings her son from the room                                                                        |             |            |
| 12:50 | TB             |                    | Opens the hot water in the flask                                                                    | Water       |            |
| 12:51 | TB             |                    | Opens bottle water                                                                                  | Water       |            |
| 12:52 | TB             |                    | Pours water into feeding bottle                                                                     | Water       |            |
| 12:53 | TB             |                    | Pours hot water into an empty cup                                                                   | Water       |            |

| TIME  | ACTOR INITIALS | RECIPIENT INITIALS | WHAT HAPPENED                                                          | FOOD              | Reactivity |
|-------|----------------|--------------------|------------------------------------------------------------------------|-------------------|------------|
| 12:54 | TB             |                    | Brings a container of cerelac                                          | Cereals           |            |
| 12:55 | TB             |                    | Fetches 3 spoons of cerelac into the cup of hot water                  | Hot water         |            |
| 12:56 | TB             |                    | Mixes cerelac with hot water using a spoon                             | Cereals           |            |
| 12:57 | TB             |                    | Uses a spoon to taste the hot water mixed with cerelac                 | Cereal and water  |            |
| 12:58 | TB             |                    | Pours a little cold water on the cerelac                               | Water and cerelac |            |
| 12:59 | TB             |                    | Mixes it to blend                                                      | Water and cereal  |            |
| 01:00 | TB             |                    | Allows it to get cold                                                  | Water and cereals |            |
| 01:01 | TB             |                    | Waiting for the cerelac                                                | Cereal and water  |            |
| 01:02 | TB             |                    | Still mixing the cerelac                                               | Cereal            |            |
| 01:03 | TB             |                    | Brings MNP                                                             | MNP               |            |
| 01:04 | TB             |                    | Trying to unseal the MNP                                               | MNP               |            |
| 01:05 | TB             |                    | Bring a scissors                                                       |                   |            |
| 01:06 | TB             |                    | Use scissors to cut off the MNP seal                                   | MNP               |            |
| 01:07 | TB             |                    | Pours MNP into the cup of cerelac                                      | MNP and Cerelac   |            |
| 01:08 | TB             |                    | Mixing the MNP and the cerelac to blend                                | MNP and cereal    |            |
| 01:09 | TB             |                    | Still mixing the MNP                                                   | MNP and Cereal    |            |
| 01:10 | TB             | SM                 | Brings a beep and wear it on the neck of the child                     |                   |            |
| 01:11 | TB             | SM                 | Start feeding her son with MNP mixed in cerelac but did not have taste |                   |            |

| TIME  | ACTOR INITIALS | RECIPIENT INITIALS | WHAT HAPPENED                                                                | FOOD           | Reactivity |
|-------|----------------|--------------------|------------------------------------------------------------------------------|----------------|------------|
| 01:13 | TB             | SM                 | Continues feeding her child after she has seen that the MNP has blended well | MNP and cereal |            |
| 01:14 |                | SM                 | Opens his mouth and wait for his mother to feed him                          |                |            |
| 01:15 | TB             | SM                 | Feeding her son                                                              | MNP and Cereal |            |
| 01:16 | TB             | SM                 | Feeding her son                                                              | MNP and Cereal |            |
| 01:17 | TB             | SM                 | Feeding her son and singing for him at the same time                         | MNP and Cereal |            |
| 01:18 | TB             | SM                 | Feeding her son slowly                                                       | MNP and Cereal |            |
| 01:19 | TB             | SM                 | Feeding her son slowly                                                       | MNP and Cereal |            |
| 01:20 | TB             | SM                 | Feeding her son slowly                                                       | MNP and Cereal |            |
| 01:21 | TB             | SM                 | Feeding her son still using a cup and spoon                                  | MNP and Cereal |            |
| 01:22 | TB             | SM                 | Gives her child little bottle water to drink                                 | Water          |            |
| 01:23 | TB             | SM                 | Continues feeding her child with MNP mixed cerelac                           | MNP and Cereal |            |
| 01:24 | TB             | SM                 | Continues feeding her child                                                  | MNP and Cereal |            |
| 01:25 | TB             | SM                 | Gives her child little bottle water to drink                                 | Water          |            |
| 01:26 | TB             | SM                 | Continues feeding her child                                                  | MNP and Cereal |            |
| 01:27 | TB             | SM                 | Finished all the MNP mixed into cerelac portion                              | MNP and        |            |

| TIME  | ACTOR INITIALS | RECIPIENT INITIALS | WHAT HAPPENED                                                      | FOOD            | Reactivity |
|-------|----------------|--------------------|--------------------------------------------------------------------|-----------------|------------|
|       |                |                    |                                                                    | Cereal          |            |
| 01:28 | TB             | SM                 | Cleans the face of her child with a beep                           |                 |            |
| 01:29 | TB             | SM                 | Gives him water to drink                                           | Water           |            |
| 01:30 | SM             |                    | Start crying                                                       |                 |            |
| 01:31 | TB             | SM                 | Start playing with her child on her lap                            |                 |            |
| 01:32 | TB             | SM                 | Carry her child on her back                                        |                 |            |
| 01:33 | TB             |                    | Takes empty cup to rinse                                           |                 |            |
| 01:34 | TB             |                    | Rinsing the cup she fed her child with                             |                 |            |
| 01:35 | TB             |                    | Gives her child to her cousin                                      |                 |            |
| 01:40 | TG             | SM                 | Playing with the child in the compound                             |                 |            |
| 01:41 | TB             |                    | Goes to the kitchen                                                |                 |            |
| 01:42 | TB             |                    | Carry a pot and pours water into it                                | Water           |            |
| 01:43 | TB             |                    | Light the stove                                                    |                 |            |
| 01:44 | TB             |                    | Place a pot on the burning stove                                   |                 |            |
| 01:45 | TB             |                    | Cover the pot with water inside                                    | Water           |            |
| 01:46 | TB             |                    | Brings an already prepared pot of soup from the second kitchen     | spinach         |            |
| 01:47 | TB             |                    | Keeps the pot by the side of the stove                             | Spinach         |            |
| 01:48 | TB             |                    | Brings maize flour and a sieve                                     |                 |            |
| 01:49 | TB             |                    | Brings another flat plate                                          |                 |            |
| 01:49 | TB             |                    | Start sieving maize on the flat plate                              | Maize           |            |
| 01:49 | TB             |                    | Continues to sieve maize flour                                     | Maize           |            |
| 01:49 | TB             |                    | Fetches some maize flour and pours into a bowl with cold water     | Maize and water |            |
| 01:49 | TB             |                    | Start mixing the maize flour with cold water faster to avoid lumps | Maize and water |            |
| 01:50 | TB             |                    | Opens the pot with water on the stove                              | Water           |            |
| 01:51 | TB             |                    | Pour mixed maize flour with cold water into boiling water          | Maize and water |            |
| 01:52 | TB             |                    | Removes the stick and keep it aside                                |                 |            |
| 01:53 | TB             |                    | Cover the pot                                                      |                 |            |
| 01:54 | TB             |                    | Bring a food warmer                                                |                 |            |

| TIME  | ACTOR INITIALS | RECIPIENT INITIALS | WHAT HAPPENED                                          | FOOD    | Reactivity |
|-------|----------------|--------------------|--------------------------------------------------------|---------|------------|
| 01:56 | TB             |                    | Opens the pot on the fire                              |         |            |
| 01:57 | TB             |                    | Pours maize flour and begin to mix faster              | maize   |            |
| 01:58 | TB             |                    | Mixing the maize flour into tuwo                       | maize   |            |
| 01:59 | TB             |                    | Removes the stick and covers the pot                   |         |            |
| 02:00 | TB             |                    | Brings a serving spoon                                 |         |            |
| 02:01 | TB             |                    | Opens the pot on the fire                              |         |            |
| 02:02 | TB             |                    | Start serving tuwo into the food warmer                | Maize   |            |
| 02:03 | TB             |                    | Continue to serve the tuwo                             | Maize   |            |
| 02:04 | TB             |                    | Serves all the tuwo into the food warmer               | Maize   |            |
| 02:05 | TB             |                    | Carry pot and pour water into it                       |         |            |
| 02:06 | TB             |                    | Reduce the flame of the stove                          |         |            |
| 02:07 | TB             |                    | Puts the pot of soup on the stove                      | Spinach |            |
| 02:08 | TB             |                    | Opens the pot of soup                                  | Spinach |            |
| 02:09 | TB             |                    | Stirs the soup                                         | Spinach |            |
| 02:10 | TB             |                    | Use a spoon to taste the soup                          | Spinach |            |
| 02:11 | TB             |                    | Drop the spoon and cover the pot                       |         |            |
| 02:12 | TB             |                    | Standing and waiting for the soup to steam             | Spinach |            |
| 02:13 | TB             |                    | Bring down the pot of soup from the stove              | Spinach |            |
| 02:14 | TB             |                    | Sprinkles little water to quench the stove             |         |            |
| 02:15 | TB             |                    | Carry the food warmer to a corner                      | Maize   |            |
| 02:20 | TQ,SM          |                    | Playing together in the compound                       |         |            |
| 02:25 | TB             |                    | Start cleaning an umbrella                             |         |            |
| 02:30 | TB             |                    | Cleaning an umbrella using a rag                       |         |            |
| 02:35 | TB             |                    | Bring dirty plate from the kitchen                     |         |            |
| 02:40 | TB             |                    | Bring cups and jugs to the compound                    |         |            |
| 02:45 | TB             |                    | Gathered the dirty plates, cups and jugs in a big bowl |         |            |
| 02:50 | TB             |                    | Pour water on the dirty plates, cups and jugs          |         |            |
| 02:55 | TB             |                    | Bring out liquid detergent                             |         |            |
| 03:00 | TB             |                    | Starts washing the cups, plates and the jugs           |         |            |
| 03:05 | TB             |                    | Continue washing                                       |         |            |



| TIME  | ACTOR INITIALS | RECIPIENT INITIALS | WHAT HAPPENED                                                  | FOOD        | Reactivity |
|-------|----------------|--------------------|----------------------------------------------------------------|-------------|------------|
| 3:10  | TB             |                    | Start rinsing the plates and jugs                              |             |            |
| 03:15 | TB             |                    | Continues to rinse                                             |             |            |
| 03:20 | TB             |                    | Start washing all pots                                         |             |            |
| 03:25 | TB             |                    | Washing all pots                                               |             |            |
| 03:30 | TB             |                    | Continues to wash the back of the pot using sand and detergent |             |            |
| 03:35 | TB             |                    | Start rinsing all the pots                                     |             |            |
| 03:40 | TB             |                    | Takes the dirty plates water outside to pour away              |             |            |
| 03:45 | TB             |                    | Returns with the empty big bowl                                |             |            |
| 03:50 | TB             |                    | Sweeping the spot where she washed the plates and pots         |             |            |
| 03:55 | TB             |                    | Starts fetching water in a bucket                              |             |            |
| 04:00 | TB             |                    | Goes to the bathroom with a bucket of water                    |             |            |
| 04:05 | TB             |                    | Playing alone in the compound while sitting on a mat           |             |            |
| 04:10 | TB             |                    | Comes out of the bathroom                                      |             |            |
| 04:15 |                |                    | Enters a room                                                  |             |            |
| 04:20 |                |                    | Comes out of the room well dressed                             |             |            |
| 04:25 | TB             | SM                 | Carry her child on her lap                                     |             |            |
| 04:30 | TB             | SM                 | Start breastfeeding                                            | Breast milk |            |
| 04:35 | TB             | SM                 | Breastfeeding her child                                        | Breast milk |            |
| 04:40 | TB             | SM                 | Breastfeeding her child                                        | Breast milk |            |
| 04:45 | TB             | SM                 | Breastfeeding her child                                        | Breast milk |            |
| 04:50 | TB             | SM                 | Breastfeeding her child                                        | Breast milk |            |
| 04:55 | TB             | SM                 | Breastfeeding her child                                        | Breast milk |            |
| 05:00 | TB             | SM                 | Breastfeeding her child                                        | Breast milk |            |
| 05:05 | TB             | SM                 | Breastfeeding her child                                        | Breast milk |            |
| 05:10 | TB             | SM                 | Breastfeeding her child                                        | Breast      |            |

| TIME  | ACTOR INITIALS | RECIPIENT INITIALS | WHAT HAPPENED                  | FOOD        | Reactivity |
|-------|----------------|--------------------|--------------------------------|-------------|------------|
|       |                |                    |                                | milk        |            |
| 05:15 | TB             | SM                 | Breastfeeding her child        | Breast milk |            |
| 05:20 | TB             | SM                 | Breastfeeding her child        | Breast milk |            |
| 05:25 | TB             | SM                 | Breastfeeding her child        | Breast milk |            |
| 05:30 | TB             | SM                 | Carry her child to the room    |             |            |
| 05:35 | SM             |                    | Sleeping                       |             |            |
| 05:40 | SM             |                    | Sleeping                       |             |            |
| 05:45 | SM             |                    | Sleeping                       |             |            |
| 05:50 | SM             |                    | Sleeping                       |             |            |
| 05:55 | TB             |                    | Sit on a chair in the compound |             |            |
| 06:00 | TB             |                    | Sitting and combing her hair   |             |            |

PARTICIPANT ID: \_\_

Primary Questions (Complete after you complete data collection):

From what you have seen observing THIS HOUSEHOLD, please answer the following questions in detail:

| Question                                                                                                                                                      | Write your <u>detailed</u> response here                                                                                                                                                                                                                                           |
|---------------------------------------------------------------------------------------------------------------------------------------------------------------|------------------------------------------------------------------------------------------------------------------------------------------------------------------------------------------------------------------------------------------------------------------------------------|
| <p>1. In this household, what would be the best way(s) to give nutritional supplements such as an MNP to young children to ensure compliance?</p> <p>Why?</p> | <p>The best way to give MNP to the young child should be in the afternoon after the child wakes from his usual nap.</p> <p>Because this young child just got introduced to complimentary feeding and he is used to eating semi-solid food only in the afternoon after his nap.</p> |
| <p>2. In this household, who is favored during meal preparation or feeding?</p> <p>How is this favoritism expressed?</p>                                      | <p>Nobody is favoured during meal preparation because there are no children in this household and after the meal is prepared all the food is served in the food warmer for just the husband or wife to fetch when they are hungry.</p>                                             |

|                                                                                                                                                                                                                        |                                                                                                                                                                                                                                                                                                                                                                                                                             |
|------------------------------------------------------------------------------------------------------------------------------------------------------------------------------------------------------------------------|-----------------------------------------------------------------------------------------------------------------------------------------------------------------------------------------------------------------------------------------------------------------------------------------------------------------------------------------------------------------------------------------------------------------------------|
|                                                                                                                                                                                                                        |                                                                                                                                                                                                                                                                                                                                                                                                                             |
| <p>3. How could we promote the MNP supplement for this family that would attract their attention?</p> <p>Who would they listen to?</p>                                                                                 | <p>MNP can be promoted to this family through the mother since she stays all day with the child unlike the father who goes to the farm and stays all day in the farm.</p> <p>The young child would listen to the mother more because she understands the child better than anyone else and she is always around the child to play with him and also spend some quality time in his upbringing.</p>                          |
| <p>4. In this household, what would be the best ways to promote the MNP but limit how much it would be shared?</p> <p>Why?</p>                                                                                         | <p>The best way would be to introduce the MNP during his complimentary feeding which is usually in the afternoon. The tendency that the MNP could be shared is very limited because the young child in this household is the only child with no siblings.</p> <p>The mother is well organized woman and there are no older children or children from the neighbourhood that can gain access to where the MNP is stored.</p> |
| <p>5. What other issues and concerns did you see with this family that are important for us to consider with regard to introduction of an MNP?</p> <p>Why?</p>                                                         | <p>There are no issues or concerns with the regard to the introduction of MNP in this household.</p> <p>This household has enough food, the mother maintains a good hygiene. The young child feeding pattern is okay because he eats all the semisolid food mixed with MNP without rejection. There are no issues.</p>                                                                                                      |
| <p>6. Based on your experience observing this child today, do you believe reactivity negatively impacted your ability to see the food-related behaviors of the child?</p> <p>Please explain your answer in detail.</p> | <p>Reactivity did not negatively impact my ability to see any food related behavior.</p> <p>There was no such thing as a reactive behavior in this house.</p>                                                                                                                                                                                                                                                               |
