# Supplementary material for: Acceptance and compliance with micronutrient powder (MNP) among children aged 6–23 months in northern Nigeria
Source: PLOS journal article supplement (doi:10.1371/journal.pgph.0000961), 2022-10-17
Supplement: S8 (10.1371/journal.pgph.0000961.s008) [file journal.pgph.0000961.s008]

# SPOT CHECK RECORDING FORM

State: Kebbi LGA: Jega Community: Ruga

Sex of index child: M Age of index child (in months): 11

## Spot Check Information

1. Date of MNP distribution to household (circle option below based on LGA name above):

🚦 Kebbi: BirninKebbi&Jega LGA: **June 16**

🚦 Kebbi: Danko-wasagu: **June 17**

🚦 Adamawa:Song, Ganye: **June 18**

🚦 Adamawa:Guyuk **June 19**

2. Date of Spot Check Observation: 06/07/15

3. Number of sachets remaining(Ask the caregiver to show you and count the specific number of sachets remaining):

38

4. Number of sachets that should remainusing one MNP sachet per day (Analyst only):

41

5. Number of sachets remaining / number of sachets should be remaining(Analyst only):

\_\_\_\_38\_\_\_\_ / \_\_\_\_41\_\_\_\_ = \_\_\_\_92.7\_\_\_\_ %

## Probes

**Question 1.** You have **XX** MNP sachets remaining. Explain how easy or difficult it was to use the MNP product on a daily basis for your child 6 – 23 months? (Circle one answer)

**Very Difficult**

**Difficult**

**Easy**

**Very Easy**

**Question 2.** Describe any specific challenges that you faced that made the MNP difficult to use on a daily basis?

There is no challenge, I don't know whether it gave her any challenge at the beginning when I was away but since I came I have not noticed any difficulty

**Question 3.** Describe specific aspects of the MNP product that you or your child enjoyed that made it easier to use on a daily basis?

We enjoy the improvement we are seeing in our children's health

**Question 4.** What questions do you have about the MNP based on your experience using it?

**I couldn't meet the health personnel that brought the MNP. What illnesses does it prevent or treat and what are the benefits of using it?**

**Question 5.** What specific recommendations do you have that we can do as a program to make the MNP easier to use on a daily basis?

My recommendation is that the health officers should champion the campaign of going to all rural areas to distribute the MNP and create awareness on the benefits on how it should be used
