# Supplementary material for: Acceptance and compliance with micronutrient powder (MNP) among children aged 6–23 months in northern Nigeria
Source: PLOS journal article supplement (doi:10.1371/journal.pgph.0000961), 2022-10-17
Supplement: S8 (10.1371/journal.pgph.0000961.s008) [file journal.pgph.0000961.s008]

### 1.1.1 Instrument F –Direct Observation Form

#### <<Instrument F Direct Observation Form>>

**PI Name:** PragmaMathema,Stephen Kodish

**Study Title:** Formative research to develop an infant and young child feeding (IYCF) intervention with micronutrient powder (MNP) for children aged 6 – 23 months

**PI Version/Date:** Version1.0/January 24, 2015

Date: \_June 22, 2015\_\_\_\_\_Location: \_ Dadiri community,GANYE, LGA\_\_\_\_\_

Data Collector: Aisha Aliyu Dahiru\_\_\_\_\_Participant ID: \_\_small hut with low verandah\_

Main goals of this direct observation are to answer the following questions:

1. In this household, what would be the best way(s) to give nutritional supplements to young children? Why?
2. In this household, describe the food sharing that you observe throughout the meal. Are there any predictable patterns?
3. In this household, who is favored and how is this favoritism expressed during meal preparation and eating?

(TEAR OFF AT PERFORATED DOTTED LINE BELOW)

-----

PARTICIPANT ID: small hut with low verandah\_\_

Household Composition Table (Fill out as you do data collection)

| INITIALS | SEX (M/F) | AGE (estimated) | Relationship to household | Description                                                      |
|----------|-----------|-----------------|---------------------------|------------------------------------------------------------------|
| M        | F         | 30YRS           | Mother                    | Wearing a red wrapper with a head tie.                           |
| BB       | M         | 18 MONTHS       | BABY BOY                  | Dark, wearing pants without shirt because of wound on his chest. |
| BC       | M         | 2 YEARS         | Sister's son (boy)        | Wearing blue checked shirt with brown trouser.                   |
| OB       | M         | 8 YEARS         | Older son                 | Wearing blue shirt and black trouser                             |
| OS       | M         | 11YEARS         | Older son                 | Wearing blue shirt and black trouser                             |
| N        | F         | 17 YEARS        | Neighbor                  | Wearing blue dress                                               |
|          |           |                 |                           |                                                                  |

|  |  |  |  |  |
|--|--|--|--|--|
|  |  |  |  |  |
|  |  |  |  |  |
|  |  |  |  |  |
|  |  |  |  |  |
|  |  |  |  |  |
|  |  |  |  |  |
|  |  |  |  |  |
|  |  |  |  |  |
|  |  |  |  |  |

PARTICIPANT ID: \_small hut wit low verandah\_\_\_\_\_

| TIME | ACTOR INITIALS | RECIPIENT INITIALS | WHAT HAPPENED                               | FOOD | Reactivity |
|------|----------------|--------------------|---------------------------------------------|------|------------|
| 9.00 | M              | BB, BC             | Mother playing with children                |      |            |
| 9:05 | M              | BB,BC              | Mother playing with children                |      |            |
| 9:10 | M              | BB,BC              | Mother playing with children                |      |            |
| 9:15 | BB             |                    | Baby boy playing with cousin (sister's son) |      |            |
| 9:20 | BC             |                    | Sister's son playing with baby boy          |      |            |
| 9:25 | M              |                    | Sitting on a bench with the children        |      |            |
| 9:30 | M              | BB,BC              | Mother chatting with the children           |      |            |
| 9:35 | M              | BB,BC              | Mother chatting with the children           |      |            |
| 9:40 | M              | BB,BC              | Mother chatting with the children           |      |            |
| 9:45 | M              | BB,BC              | Mother chatting with the children           |      |            |
| 9:50 | M              |                    | Resting under the veranda                   |      |            |

| TIME  | ACTOR INITIALS | RECIPIENT INITIALS | WHAT HAPPENED                                               | FOOD       | Reactivity |
|-------|----------------|--------------------|-------------------------------------------------------------|------------|------------|
|       |                |                    |                                                             |            |            |
| 9:55  | BB             |                    | Baby playing near the mother                                |            |            |
| 10:00 | BB             |                    | Baby is playing                                             |            |            |
| 10:05 | BB             |                    | Baby is playing on the bench                                |            |            |
| 10:10 | BB             |                    | Baby is playing on the bench                                |            |            |
| 10:15 | BB             |                    | Baby is playing on the mat                                  |            |            |
| 10:20 | M              | BB                 | Mother breastfeeding baby                                   |            |            |
| 10:25 | M              | BB                 | Mother breastfeeding baby                                   |            |            |
| 10:30 | M              | BB                 | Mother breastfeeding baby                                   |            |            |
| 10:35 | M              | BB                 | Mother breastfeeding baby                                   |            |            |
| 10:40 | BB             |                    | Baby playing on the mat                                     |            |            |
| 10:45 | BB             |                    | Baby crying                                                 |            |            |
| 10:50 | M              | BB                 | Mother carrying baby on her laps                            |            |            |
| 10:55 | M              | BB                 | Mother consoling baby                                       |            |            |
| 11:00 | M              | BB                 | Mother carrying baby on her laps                            |            |            |
| 11:05 | M              |                    | Mother goes into the room to pick something (flask)         |            |            |
| 11:10 | M              | BB                 | Mother breastfeeding the baby on the bench                  |            |            |
| 11:15 | M              | BB                 | Mother breastfeeding the baby on the bench                  |            |            |
| 11:20 | M              |                    | Mother pouring kunu from the flask                          |            |            |
| 11:21 | M              |                    | Pouring a portion of kunu from a big cup into a smaller cup |            |            |
| 11:23 | M              |                    | Adding MNP into a smaller cup                               | Kunu gyada |            |

| TIME  | ACTOR INITIALS | RECIPIENT INITIALS | WHAT HAPPENED                                                           | FOOD       | Reactivity |
|-------|----------------|--------------------|-------------------------------------------------------------------------|------------|------------|
| 11:24 | M              |                    | Mixing MNP into kunu                                                    | Kunu gyada |            |
| 11:24 | M              |                    | Mixing MNP into kunu                                                    |            |            |
| 11:25 | M              | BB                 | Mother feeding the baby with kunu using spoon ( portion mixed with MNP) | Kunu gyada |            |
| 11:26 | M              | BB                 | Mother feeding baby kunu mixed with MNP                                 | Kunu gyada |            |
| 11:27 | M              | BB                 | Mother feeding baby kunu mixed with MNP                                 | Kunu gyada |            |
| 11:28 | M              | BB                 | Mother feeding baby kunu mixed with MNP                                 | Kunu gyada |            |
| 11:29 | M              | BB                 | Mother feeding baby with kunu without MNP                               | Kunu gyada |            |
| 11:30 | M              | BB                 | Mother feeding baby with kunu                                           | Kunu gyada |            |
| 11:35 | M              | BB                 | Washing the baby's hands and mouth                                      |            |            |
| 11:40 | M              | BB                 | Carrying baby on her back                                               |            |            |
| 11:50 | M              |                    | Picking plates around the house into a large tray                       |            |            |
| 11:55 | M              |                    | Mother taking water from the clay pot into a large container            |            |            |
| 12:00 | M              |                    | Mother taking utensils and water to the back of the kitchen             |            |            |
| 12:05 | M              | BB                 | Carrying the baby on her back                                           |            |            |
| 12:10 | M              |                    | Rinsing the utensils                                                    |            |            |
| 12:15 | M              |                    | Stepping out of the house                                               |            |            |
| 12:20 | M              |                    | Buying detergent from neighbour's                                       |            |            |
| 12:20 | M              | BB                 | Mother carrying baby on her back                                        |            |            |
| 12:25 | BB             |                    | Crying                                                                  |            |            |
| 12:30 | M              | BB                 | Mother trying to console                                                |            |            |

| TIME  | ACTOR INITIALS | RECIPIENT INITIALS | WHAT HAPPENED                                | FOOD         | Reactivity |
|-------|----------------|--------------------|----------------------------------------------|--------------|------------|
|       |                |                    |                                              |              |            |
| 12:35 | M              | BB                 | Brings baby down from back to sit on her lap |              |            |
| 12:40 | M              | BB                 | Mother breastfeeding baby                    |              |            |
| 12:41 | M              | BB                 | Mother breastfeeding baby                    |              |            |
| 12:42 | M              | BB                 | Mother breastfeeding baby                    |              |            |
| 12:43 | M              | BB                 | Mother breastfeeding baby                    |              |            |
| 12:44 | M              | BB                 | Mother breastfeeding baby                    |              |            |
| 12:45 | M              | BB                 | Mother breastfeeding baby                    |              |            |
| 12:50 | M              | BB                 | Mother breastfeeding baby                    |              |            |
| 12:50 | BB             |                    | Sleeping on mother's lap                     |              |            |
| 12:55 | BB             |                    | Sleeping on mother's lap                     |              |            |
| 01:00 | BB             |                    | Sleeping on mother's lap                     |              |            |
| 01:05 | M              | BB                 | Lying down baby on the mat under the veranda |              |            |
| 01:05 | M              |                    | Lying down beside the baby on the mat        |              |            |
| 01:10 | BC             |                    | Lying down beside the mother                 |              |            |
| 01:15 | BB             |                    | Baby sleeping                                |              |            |
| 01:20 | M              |                    | Sitting beside the children on the mat       |              |            |
| 01:25 | OB             |                    | Walks into the house                         |              |            |
| 01:25 | OB             | M                  | Sitting on a stool and greeting the mother   |              |            |
| 01:30 | OB             |                    | Bringing down a bowl                         |              |            |
| 01:30 | OB             |                    | Serving tuwo from bowl into a cup            | Tuwon masara |            |
| 01:35 | M              | OB                 | Scolding the older boy for letting           |              |            |

| TIME  | ACTOR INITIALS | RECIPIENT INITIALS | WHAT HAPPENED                                           | FOOD                | Reactivity |
|-------|----------------|--------------------|---------------------------------------------------------|---------------------|------------|
|       |                |                    | the food fall                                           |                     |            |
| 01:40 | OB             |                    | Crying because the mother is scolding him               |                     |            |
| 01:45 | OB             |                    | Adding water into cup with tuwo                         |                     |            |
| 01:50 | OB             |                    | Washing hands                                           |                     |            |
| 01:55 | OB             | BC                 | Gives sister's son portion of mixed tuwo in a small cup | Tuwon masara        |            |
| 02:00 | OB             |                    | Eating the mixed tuwo with his hands                    | Tuwon masara        |            |
| 02:00 | BC             |                    | Eating the mixed tuwo with his hand                     |                     |            |
| 02:00 | BB             |                    | Baby is still sleeping                                  |                     |            |
| 02:00 | M              |                    | Mother sitting beside sleeping baby                     |                     |            |
| 02:05 | OB             |                    | Eating with his hands                                   |                     |            |
| 02:06 | OB             | BC                 | Older boy assisting sister's boy to eat                 |                     |            |
| 02:07 | OB             |                    | Older boy eating                                        |                     |            |
| 02:12 | M              | OB                 | Chatting with older boy                                 |                     |            |
| 02:17 | OB             |                    | Finished eating tuwon and licking his hands             |                     |            |
| 02:20 | OB             |                    | Washing hands                                           |                     |            |
| 02:20 | OB             |                    | Going out of the house                                  |                     |            |
| 02:20 | BB             |                    | Baby still sleeping                                     |                     |            |
| 02:20 | BC             |                    | Finished eating and handover cup to mother              |                     |            |
| 02:20 | M              | BC                 | Washing boy mouth and hands                             |                     |            |
| 02:25 | M              |                    | Mixing tuwo with water in a large cup                   | Tuwon masara, water |            |
| 02:25 | M              | BC                 | Gives sister's son more of mixed                        | Tuwon               |            |

| TIME  | ACTOR INITIALS | RECIPIENT INITIALS | WHAT HAPPENED                                 | FOOD   | Reactivity |
|-------|----------------|--------------------|-----------------------------------------------|--------|------------|
|       |                |                    | tuwo                                          | masara |            |
| 02:25 | BB             |                    | Baby still sleeping                           |        |            |
| 02:25 | M              |                    | Washing utensils                              |        |            |
| 02:30 | M              |                    | Washing utensils                              |        |            |
| 02:35 | M              |                    | Washing utensils                              |        |            |
| 02:40 | M              |                    | Washing utensils                              |        |            |
| 02:45 | M              |                    | Washing utensils                              |        |            |
| 02:50 | M              |                    | Washing utensils                              |        |            |
| 02:55 | M              |                    | Washing utensils                              |        |            |
| 03:00 | M              |                    | Washing utensils                              |        |            |
| 03:00 | BC             | M                  | Handing cup to mother                         |        |            |
| 03:00 | M              | BC                 | Washing baby's hands and mouth                |        |            |
| 03:00 | BB             |                    | Baby is sleeping                              |        |            |
| 03:00 | BB             |                    | Baby is sleeping                              |        |            |
| 03:05 | M              |                    | Washing utensils                              |        |            |
| 03:10 | M              | BB                 | Mother checking on sleeping baby              |        |            |
| 03:15 | OC             |                    | Comes into the house carrying a bag pack      |        |            |
| 03:15 | OB             |                    | Comes into the house along with older brother |        |            |
| 03:20 | OB             |                    | Changing cloth into brown shirt with canvas   |        |            |
| 03:20 | M              |                    | Mother washing the clay pot containing        |        |            |
| 03:25 | M              |                    | Setting fire                                  |        |            |
| 03:30 | M              |                    | Setting fire                                  |        |            |

| TIME  | ACTOR INITIALS | RECIPIENT INITIALS | WHAT HAPPENED                                                    | FOOD                              | Reactivity |
|-------|----------------|--------------------|------------------------------------------------------------------|-----------------------------------|------------|
|       |                |                    |                                                                  |                                   |            |
| 03:35 | BB             |                    | Wakes up crying                                                  |                                   |            |
| 03:35 | OC             | MM                 | Picking up the baby boy and hands him to mother                  |                                   |            |
| 03:35 | M              | BB                 | Carrying baby on laps and breastfeed him                         |                                   |            |
| 03:40 | M              | BB                 | Breastfeeding the baby                                           |                                   |            |
| 03:45 | OC             |                    | Picks up plastic container and goes out of the house             |                                   |            |
| 03:45 | M              | BB                 | Breastfeeding the baby                                           |                                   |            |
| 03:50 | OC             |                    | Bringing in water in plastic container and putting into clay pot |                                   |            |
| 03:50 | M              | BB                 | Breastfeeding the baby                                           |                                   |            |
| 03:55 | OC             | BB                 | Older child playing with baby boy                                |                                   |            |
| 04:00 | OC             |                    | Older child carrying the baby boy                                |                                   |            |
| 04:00 | M              |                    | Setting fire                                                     |                                   |            |
| 04:05 | M              |                    | Pacing pot with water on fire and covers it                      |                                   |            |
| 04:10 | M              |                    | Adding flour into boiling water to make meal                     | Maize flour, water                |            |
| 04:15 | M              |                    | Meal is ready to be served                                       |                                   |            |
| 04:15 | M              |                    | Adding vegetable in the another pot on the fire                  | Beans leaves                      |            |
| 04:15 | M              |                    | Adding seasoning into pot on fire and mixing it                  |                                   |            |
| 04:20 | M              |                    | Meal is ready to be served                                       | Beans leaves soup                 |            |
| 04:20 | OC             | BB                 | Playing with baby                                                |                                   |            |
| 04:25 | M              |                    | Sewing meal into a single dish                                   | Maize meal plus beans leaves soup |            |
| 04:30 | BB             |                    | Playing                                                          |                                   |            |
| 04:30 | OC             | BB                 | Giving baby boy water to drink                                   | Water                             |            |
| 04:35 | M              | OC, BB             | Mother chatting with older child and baby under the veranda      |                                   |            |
| 04:40 | BB             |                    | Playing with chicken                                             |                                   |            |



| TIME  | ACTOR INITIALS | RECIPIENT INITIALS | WHAT HAPPENED                                                                  | FOOD | Reactivity |
|-------|----------------|--------------------|--------------------------------------------------------------------------------|------|------------|
| 04:40 | BB             |                    | Playing around the house with older son                                        |      |            |
| 04:45 | BB             |                    | Playing around the house with older son                                        |      |            |
| 04:50 | BB             |                    | Crying from a fall while running around                                        |      |            |
| 04:55 | M              | BB                 | Mother bathing baby                                                            |      |            |
| 05:00 | M              | BB                 | Mother bathing baby                                                            |      |            |
| 05:05 | M              | BB                 | Mother rubs oil and ointment on the baby especially on the wounds on his chest |      |            |
| 05:10 | M              | BB                 | Mother dressing up baby                                                        |      |            |
| 05:15 | N              | M                  | Comes in greeting the mother                                                   |      |            |
| 05:15 | M              | N                  | Mother welcomes neighbor and offers her on a seat                              |      |            |
| 05:20 | M              | N                  | Mother chatting with neighbor and offers her seat                              |      |            |
| 05:20 | OC             | BB                 | Playing with baby boy                                                          |      |            |
| 05:25 | M              |                    | Goes into room and brings out a packet of MNP                                  |      |            |
| 05:25 | M              |                    | Mother showing neighbor MNP and chatting                                       |      |            |
| 05:30 | M              | N                  | Chatting with neighbor on MNP                                                  |      |            |
| 05:30 | BB             |                    | Playing with older son                                                         |      |            |
| 05:35 | BB             |                    | Playing with older son                                                         |      |            |
| 05:40 |                |                    | Playing with older son                                                         |      |            |
| 05:40 | BB             |                    | Pulling bag                                                                    |      |            |
| 05:45 | M              | BB                 | Mother breastfeeding baby                                                      |      |            |
| 05:50 | M              | BB                 | Mother breastfeeding baby                                                      |      |            |
| 05:55 | M              | BB                 | Mother breastfeeding baby                                                      |      |            |
| 06:00 | M              | BB                 | Mother carrying baby on her back                                               |      |            |
| 06:05 | M              | BB                 | Mother carrying baby on her back                                               |      |            |
| 06:10 | M              | BB                 | Mother brings down baby from back                                              |      |            |
|       |                |                    |                                                                                |      |            |
|       |                |                    |                                                                                |      |            |
|       |                |                    |                                                                                |      | R          |
|       |                |                    |                                                                                |      |            |
|       |                |                    |                                                                                |      |            |
|       |                |                    |                                                                                |      |            |

[illegible]

| TIME | ACTOR INITIALS | RECIPIENT INITIALS | WHAT HAPPENED | FOOD | Reactivity |
|------|----------------|--------------------|---------------|------|------------|
|      |                |                    |               |      |            |
|      |                |                    |               |      |            |
|      |                |                    |               |      |            |
|      |                |                    |               |      |            |
|      |                |                    |               |      |            |
|      |                |                    |               |      |            |
|      |                |                    |               |      |            |
|      |                |                    |               |      |            |
|      |                |                    |               |      |            |
|      |                |                    |               |      |            |

PARTICIPANT ID: \_\_ \_\_\_\_\_

Primary Questions (Complete after you complete data collection):

From what you have seen observing THIS HOUSEHOLD, please answer the following questions in detail:

| Question                                                                                                                                               | Write your <u>detailed</u> response here                                                                                                                                                                                  |
|--------------------------------------------------------------------------------------------------------------------------------------------------------|---------------------------------------------------------------------------------------------------------------------------------------------------------------------------------------------------------------------------|
| 1. In this household, what would be the best way(s) to give nutritional supplements such as an MNP to young children to ensure compliance?<br><br>Why? | The best way is to train the mother on MNP because the child is fed from a separate bowl. The mother should be made to understand the importance of giving the child the MNP daily and the way to administer it properly. |
| 2. In this household, who is favored during meal preparation or feeding?                                                                               | The food prepared was solid. Kunu gyada was given to the baby boy and he ate separately                                                                                                                                   |

|                                                                                                                                        |                                                                                                                                                                                                                                                                                                          |
|----------------------------------------------------------------------------------------------------------------------------------------|----------------------------------------------------------------------------------------------------------------------------------------------------------------------------------------------------------------------------------------------------------------------------------------------------------|
| <p>How is this favoritism expressed?</p>                                                                                               | <p>The baby ate in a separate bowl<br/>The food was in solid state.</p>                                                                                                                                                                                                                                  |
| <p>3. How could we promote the MNP supplement for this family that would attract their attention?</p> <p>Who would they listen to?</p> | <p>MNP can be promoted to this family through the mother. It can also be promoted through the radio<br/>Religious and community leaders are well respected so they will listen to them. The husband is the most influential in the household because he holds the final decision power in the house.</p> |
| <p>4. In this household, what would be the best ways to promote the MNP but limit how much it would be shared?</p> <p>Why?</p>         | <p>The child should be fed first with a portion of food that contains MNP before eating with the rest of the family.<br/>Ensure the mother understands that MNP is meant for children from 6 months to 23 months<br/>Ensure the older children are not present during MNP administration.</p>            |

|                                                                                                                                                                                                                        |                                                                                                                                                                                                                                                                                                                   |
|------------------------------------------------------------------------------------------------------------------------------------------------------------------------------------------------------------------------|-------------------------------------------------------------------------------------------------------------------------------------------------------------------------------------------------------------------------------------------------------------------------------------------------------------------|
|                                                                                                                                                                                                                        |                                                                                                                                                                                                                                                                                                                   |
| <p>5. What other issues and concerns did you see with this family that are important for us to consider with regard to introduction of an MNP?</p> <p>Why?</p>                                                         | <p>The only concern is the mother expressed how MNP has helped her son recovering from rashes on his body. So the fear is she might try to give the other children when they fall ill.</p>                                                                                                                        |
| <p>6. Based on your experience observing this child today, do you believe reactivity negatively impacted your ability to see the food-related behaviors of the child?</p> <p>Please explain your answer in detail.</p> | <p>No. the child did not show any sign of reactivity during meal. The child ate without noticing the presence of a stranger. The mother did not forcefully feed him because he readily opened his mouth to eat. The baby finished the portion with the MNP and was given more kunu which he could not finish.</p> |
