# Supplementary material for: Acceptance and compliance with micronutrient powder (MNP) among children aged 6–23 months in northern Nigeria
Source: PLOS journal article supplement (doi:10.1371/journal.pgph.0000961), 2022-10-17
Supplement: S8 (10.1371/journal.pgph.0000961.s008) [file journal.pgph.0000961.s008]

### 1.1.1 Instrument F –Direct Observation Form

#### <<Instrument F Direct Observation Form>>

**PI Name:** PragmaMathema,Stephen Kodish

**Study Title:** Formative research to develop an infant and young child feeding (IYCF) intervention with micronutrient powder (MNP) for children aged 6 – 23 months

**PI Version/Date:** Version1.0/January 24, 2015

Date: 04/07/15 Location: Bakan Yadiya

Data Collector: Amina Duniya

Main goals of this direct observation are to answer the following questions:

1. In this household, what would be the best way(s) to give nutritional supplements to young children? Why?
2. In this household, describe the food sharing that you observe throughout the meal. Are there any predictable patterns?
3. In this household, who is favored and how is this favoritism expressed during meal preparation and eating?

Household Composition Table (Fill out as you do data collection)

| INITIALS | SEX<br>(M/F) | AGE<br>(estimated) | Relationship to<br>household | Description (not necessary)                                              |
|----------|--------------|--------------------|------------------------------|--------------------------------------------------------------------------|
| BM       | F            | 20years            | Mother                       | Wearing a white and red strip blouse, yellow wrapper and yellow head tie |
| FH       | M            | 40years            | Father of household          | Slim, dark in complexion and wearing a blue kaftan                       |
| BB       | M            | 9months            | Baby boy                     | Wearing a blue top only. Has a scar on the forehead and nose             |
| FW       | F            | 30years            | First wife of husband        | Wearing a yellow blouse and multi colored wrapper and head tie           |
| SI       | F            | 17years            | Sister inlaw                 | Tying a yellow wrapper on her chest with a black singlet                 |
| FS       | M            | 2years             | First son of mother          | Wearing a blue top no pants                                              |

|    |   |         |                                        |                                                        |
|----|---|---------|----------------------------------------|--------------------------------------------------------|
| SS | F | 3years  | Step daughter to BB(father's daughter) |                                                        |
| GF | M | 50years | Grandfather                            | Has Grey hair, wearing a pink and cream colored kaftan |
| FD | F | 4years  | First daughter of mother               | Black skirt and purple blouse. Dark in complexion      |

PARTICIPANT ID: \_\_\_\_\_

| TIME  | ACTOR INITIALS | RECIPIENT INITIALS | WHAT HAPPENED                                                                                    | FOOD        | Reactivity |
|-------|----------------|--------------------|--------------------------------------------------------------------------------------------------|-------------|------------|
| 10:00 | FH             | BB                 | Father playing with BB inside the compound                                                       |             |            |
|       | BM             |                    | Pounding millet with FW                                                                          |             |            |
| 10:05 | FM             | BM                 | Gives BB to FW and goes out                                                                      |             |            |
|       | FW             | BB                 | Plays with BB and BM still pounding                                                              |             |            |
| 10:15 | FW             | BM                 | Baby crying and FW gives him back to BM                                                          |             |            |
|       | BM             | BB                 | BM collects BB and breast feeds him                                                              | Breast milk |            |
|       | BM             | BB                 | Falls asleep and BM puts him on her back                                                         |             |            |
| 10:20 | BM             |                    | Continues pounding millet<br>Finished pounding millet into powder form and pours into a calabash |             |            |
|       | BM             |                    | Pours water into millet flour and sieves                                                         |             |            |
|       | FH             |                    | Comes back and sits in then compound                                                             |             |            |
|       | FH             |                    | Playing with older son                                                                           |             |            |
| 10:25 | BM             |                    | Pours millet flour into mortar and uses then pestle to make a hard dough                         |             |            |
|       |                |                    |                                                                                                  |             |            |

| TIME  | ACTOR INITIALS | RECIPIENT INITIALS | WHAT HAPPENED                                                            | FOOD | Reactivity |
|-------|----------------|--------------------|--------------------------------------------------------------------------|------|------------|
|       |                |                    |                                                                          |      |            |
| 10:30 | BM             |                    | Fetches dough and goes into the room while baby still sleeps on her back |      |            |
| 10:35 | BM             |                    | Doing house chores while the baby is sleeping on her back                |      |            |
| 10:40 | FW             |                    | FW visits BM in her room while BB is still sleeping on BM's back         |      |            |
| 10:45 | FW             | BM                 | Still with BM                                                            |      |            |
| 10:50 | BM             |                    | BM goes outside to wash dirty pot                                        |      |            |
| 10:55 | BB             |                    | Still sleeping on BM's back                                              |      |            |
| 11:00 | BM             | FW                 | Still discussing with FW                                                 |      |            |
| 11:05 | BM             | FW                 | Still discussing with FW                                                 |      |            |
| 11:10 | FW             |                    | Leaves to her room                                                       |      |            |
| 11:15 | BB             |                    | Wakes up from sleep                                                      |      |            |
| 11:20 | BM             | BB                 | Plays with BB                                                            |      |            |
| 11:25 | SI             |                    | Comes into BM's room                                                     |      |            |
| 11:30 | FW             |                    | Comes back into BM's room                                                |      |            |
| 11:35 | BB             |                    | Still playing with BM                                                    |      |            |
| 11:40 | FW             |                    | Spits saliva on the floor                                                |      |            |
| 11:45 | BM             |                    | Discussing with SI and FW                                                |      |            |
| 11:50 | BB             |                    | Playing on his own with a chair                                          |      |            |
| 11:55 | FW             |                    | Leaves to go to her daughter's house                                     |      |            |
| 12:00 | BM             |                    | SI leaves and BM continues playing with BB                               |      |            |

| TIME  | ACTOR INITIALS | RECIPIENT INITIALS | WHAT HAPPENED                                                                         | FOOD | Reactivity |
|-------|----------------|--------------------|---------------------------------------------------------------------------------------|------|------------|
| 12:05 | BB             |                    | BB starts crying                                                                      |      |            |
|       | BB             |                    | Refuses to take breast milk from BM                                                   |      |            |
|       | BB             |                    | Continues to play and crawl around the room                                           |      |            |
|       | BM             |                    | Goes out to visit SI                                                                  |      |            |
| 12:10 | BB             |                    | Crawls to FH and begins to play                                                       |      |            |
|       | FH             |                    | Playing with BB in the compound                                                       |      |            |
| 12:15 | BB             |                    | Still playing with FH                                                                 |      |            |
| 12:20 | BB             |                    | Still playing with FH                                                                 |      |            |
|       | BM             | BB                 | Comes back and carries BB to her room                                                 |      |            |
| 12:25 | BM             | BB                 | Playing with BB in her room                                                           |      |            |
| 12:30 | BM             | BB                 | Gives him breast milk to drink<br>Finished drinking breast milk and continues playing |      |            |
| 12:35 | BB             |                    | Still playing                                                                         |      |            |
| 12:40 | BB             |                    | Playing with BM                                                                       |      |            |
|       | FS             | BB                 | Comes in and begins to play with BB                                                   |      |            |
| 12:45 | FS             | BB                 | Still playing together                                                                |      |            |
| 12:50 | BM             | BB                 | Carries BB to FH                                                                      |      |            |
|       | FH             | BB                 | Playing with BB                                                                       |      |            |
| 12:55 | BB             |                    | Still playing together                                                                |      |            |
| 1:00  | BB             |                    | Playing with FH                                                                       |      |            |
| 1:05  | BB             |                    | Playing with FS                                                                       |      |            |

| TIME | ACTOR INITIALS | RECIPIENT INITIALS | WHAT HAPPENED                                             | FOOD        | Reactivity |
|------|----------------|--------------------|-----------------------------------------------------------|-------------|------------|
| 1:10 | BM             |                    | Comes back and begins to wash plates                      |             |            |
| 1:15 | BM             | BB                 | Finished washing plates and begins to play with BB        |             |            |
| 1:20 | BM             | BB                 | Gives him kunu to drink                                   | Kunun gero  |            |
| 1:25 | BB             |                    | Finished drinking kunu and begins playing with FS         |             |            |
| 1:30 | SS             | BB                 | Carries BB to play with under the tree                    |             |            |
| 1:35 | BB             |                    | Playing alone under the tree                              |             |            |
|      | BM             |                    | Pounding guinea corn to remove the back                   |             |            |
| 1:40 | BB             |                    | Still playing by himself                                  |             |            |
|      | BM             |                    | Fetches pounded guinea corn from the mortar and washes it |             |            |
| 1:45 | BB             |                    | Plays with water used in washing guinea corn              |             |            |
|      | BM             |                    | Fetches clean water and washes BB's body                  |             |            |
| 1:50 | BM             | BB                 | Breast feeds BB                                           | Breast milk |            |
| 1:55 | BB             |                    | Finished feeding and playing on BM's lap                  |             |            |
| 2:00 | BB             |                    | Still playing                                             |             |            |
| 2:05 | BM             | BB                 | Keeps BB under the tree to play                           |             |            |
|      | BM             | FS                 | Baths FS                                                  |             |            |
| 2:10 | BB             |                    | Still playing by himself under the tree                   |             |            |
|      | BB             |                    | Starts crying and crawls to BM's room                     |             |            |
| 2:15 | BB             |                    | Playing by himself in BM's room                           |             |            |
| 2:20 | SS             | BB                 | Comes back and begins to play with BB                     |             |            |
| 2:25 | BM             | BB                 | Picks BB from the floor and begins                        |             |            |

| TIME | ACTOR INITIALS | RECIPIENT INITIALS | WHAT HAPPENED                                                                 | FOOD        | Reactivity |
|------|----------------|--------------------|-------------------------------------------------------------------------------|-------------|------------|
|      |                |                    | to play with BB                                                               |             |            |
| 2:30 | BM             | BB                 | Feeds BB with breast milk                                                     | Breast milk |            |
|      | BB             |                    | Finished feeding and continues to play                                        |             |            |
| 2:35 | BM             | BB                 | Goes back to sucking the mother's breast                                      | Breast milk |            |
| 2:40 | BB             |                    | Continues to play under the tree                                              |             |            |
| 2:50 | BB             |                    | Still playing                                                                 |             |            |
|      | BM             |                    | Peeling cassava and watching BB playing                                       |             |            |
| 2:55 | BB             |                    | Eats cassava                                                                  | Cassava     |            |
| 3:00 | BB             |                    | Plays with cassava while BM still peels cassava                               |             |            |
| 3:05 | BB             |                    | Still playing                                                                 |             |            |
|      | FH             | FS&BB              | Comes back and starts playing with BB&FS                                      |             |            |
| 3:10 | FH             | BB                 | Still playing together                                                        |             |            |
|      | BB             |                    | Playing on his own                                                            |             |            |
|      | FH             | BB                 | Watching BB play                                                              |             |            |
| 3:20 | BB             |                    | Still playing                                                                 |             |            |
| 3:25 | FH             |                    | Gets up and goes outside the house                                            |             |            |
| 3:30 | BM             | BB                 | Carries BB into the room brings him back and drops him under the tree to play |             |            |
|      | BM             |                    | Begins to pound guinea corn                                                   |             |            |
| 3:35 | BB             |                    | Still playing                                                                 |             |            |
|      | BM             | BB                 | Gives him water to drink                                                      |             |            |
|      | BB             |                    | Crawls into GF's hut                                                          |             |            |

| TIME | ACTOR INITIALS | RECIPIENT INITIALS | WHAT HAPPENED                                                           | FOOD | Reactivity             |
|------|----------------|--------------------|-------------------------------------------------------------------------|------|------------------------|
|      |                |                    |                                                                         |      |                        |
| 3:40 | BM             | BB                 | Carries him from GF's hut and keeps him with GF to play outside         |      |                        |
|      | BB             |                    | Crawls away from GF to under the tree                                   |      |                        |
|      | BM             |                    | Still pounding                                                          |      |                        |
| 3:45 | BB             |                    | Still playing under the tree                                            |      |                        |
|      | BM             | BB                 | Picks BB up and puts him on her back and continues pounding guinea corn |      |                        |
| 3:50 | BM             | BB                 | Drops him under the tree to continue playing                            |      |                        |
|      | BM             |                    | Sieves the guinea corn flour in preparation for dinner                  |      |                        |
| 3:55 | FH             |                    | Comes back and picks BB up to play with                                 |      | Picks him up too often |
| 4:00 | BM             |                    | Trying to make fire for dinner                                          |      |                        |
|      |                |                    | Puts BB on her back                                                     |      |                        |
|      | BB             |                    | Refuses to stay on BB's back and now playing on the floor               |      |                        |
| 4:05 | BB             |                    | Still playing on the floor                                              |      |                        |

|      |    |    |                                                                                                               |             |  |
|------|----|----|---------------------------------------------------------------------------------------------------------------|-------------|--|
| 4:15 | BB |    | Still playing                                                                                                 |             |  |
|      | BM |    | Finally makes the fire and puts a pot of water on it to boil                                                  |             |  |
|      | BM |    | Mixes the MNP product with very thick kunun gero. The kunun gero is warm                                      | Kunun gero  |  |
| 4:20 | BM | BB | Breast feeding the baby because he starts to cry before she could finish mixing the food with MNP             | Breast milk |  |
|      | BM | BB | Gives him kunun gero mixed with MNP<br>Due to the thickness of the kunu, BM uses her finger to fetch the kunu | Kunun gero  |  |

|      |    |          |                                                                                   |                                       |                                                         |
|------|----|----------|-----------------------------------------------------------------------------------|---------------------------------------|---------------------------------------------------------|
|      |    |          | and give to BB                                                                    |                                       |                                                         |
| 4:25 | BM | FD,FS&BB | BM allows FD and FS to eat same food mixed with MNP for BB                        | Kunun<br>gero<br>kixed<br>with<br>MNP |                                                         |
| 4:30 | BM | BB       | BM finally stops FD and FS from eating the food mixed with MNP and feeds BB alone | Kunun<br>gero<br>kixed<br>with<br>MNP |                                                         |
| 4:40 | BM |          | Performs ablution for prayers while BB IS ON HER BACK                             |                                       |                                                         |
|      | FH |          | Comes and carries BB to go play                                                   |                                       |                                                         |
| 4:43 | FH |          | Drops BB and goes out again                                                       |                                       | This shows<br>that he is<br>dropping him<br>for my sake |
| 4:45 | BB |          | Playing on the floor                                                              |                                       |                                                         |
|      | BM | BB       | BB starts crying and BM picks him up an breast feeds him                          | Breast<br>milk                        |                                                         |
| 4:50 | BB |          | Begins to sleep while sucking                                                     | Breast<br>milk                        |                                                         |
| 4:55 | BB |          | Still sucking and sleeping                                                        |                                       |                                                         |
| 4:58 | BB |          | Sleeps off finally and releases BM's breast                                       |                                       |                                                         |
| 5:00 | BM |          | Puts him down on the mat to sleep                                                 |                                       |                                                         |
| 5:05 | BM |          | Pounding guinea corn flour for tuwo                                               |                                       |                                                         |
|      | BB |          | Still sleeping                                                                    |                                       |                                                         |
| 5:10 | BB |          | Still sleeping                                                                    |                                       |                                                         |
|      | BM |          | Still pounding                                                                    |                                       |                                                         |
| 5:20 | BB |          | Still sleeping                                                                    |                                       |                                                         |
|      | BM |          | Waiting for water to boil                                                         |                                       |                                                         |
| 5:30 | BB |          | Still sleeping                                                                    |                                       |                                                         |



|      |    |    |                                                              |             |  |
|------|----|----|--------------------------------------------------------------|-------------|--|
|      |    |    |                                                              |             |  |
|      | BM |    | Goes to FW's house and greets her                            |             |  |
| 5:35 | BM |    | Comes back from FW's house and is fetching water             |             |  |
| 5:40 | BB |    | Still sleeping                                               |             |  |
|      | BM |    | Finish fetching water while waiting for pot of water to boil |             |  |
|      | BB |    | Wakes up from sleep                                          |             |  |
| 5:45 | FD | BB | Fetches some water and gives BB to drink                     |             |  |
|      | BM | BB | Breast feeds the baby                                        | Breast milk |  |
| 5:50 | BM | FW | Gives BB to FW to hold<br>Refuses to stay with FW            |             |  |
| 5:55 | BM | BB | Breast feeds the baby                                        | Breast milk |  |
| 6:00 | BB |    | Starts crying and BM carries him                             |             |  |

Primary Questions (Complete after you complete data collection):

From what you have seen observing THIS HOUSEHOLD, please answer the following questions in detail:

| Question                                                                                                                                                      | Write your <u>detailed</u> response here                                                                                                                                                                                                                  |
|---------------------------------------------------------------------------------------------------------------------------------------------------------------|-----------------------------------------------------------------------------------------------------------------------------------------------------------------------------------------------------------------------------------------------------------|
| <p>1. In this household, what would be the best way(s) to give nutritional supplements such as an MNP to young children to ensure compliance?</p> <p>Why?</p> | <p>The best way to give the MNP is through the mother because she is the one who feeds the child directly and also the senior wife (1<sup>st</sup> wife) of the husband because it seems she seems to have huge influence on the mother of the child.</p> |
| <p>2. In this household, who is favored during meal preparation or feeding?</p> <p>How is this favoritism expressed?</p>                                      | <p>The baby is favored the most because the mother feeds him directly during his meal time whereas the other children are given their food and told to go and eat wherever they want to.</p>                                                              |

|                                                                                                                                                                |                                                                                                                                                                                                                                                                             |
|----------------------------------------------------------------------------------------------------------------------------------------------------------------|-----------------------------------------------------------------------------------------------------------------------------------------------------------------------------------------------------------------------------------------------------------------------------|
|                                                                                                                                                                |                                                                                                                                                                                                                                                                             |
| <p>3. How could we promote the MNP supplement for this family that would attract their attention?</p> <p>Who would they listen to?</p>                         | <p>The product can be promoted through then involvement of the community leader the husbands. Every member of the community listens to the community leader and every wife listens to her husband.</p>                                                                      |
| <p>4. In this household, what would be the best ways to promote the MNP but limit how much it would be shared?</p> <p>Why?</p>                                 | <p>The best way to promote it would be through proper enlightenment about the benefits associated with the product and what they stand to lose if not used for him/her alone</p>                                                                                            |
| <p>5. What other issues and concerns did you see with this family that are important for us to consider with regard to introduction of an MNP?</p> <p>Why?</p> | <p>There were many children in the house because it is an extended family consisting of many brothers and their wives and children. Therefore, when introducing the program, there is need to emphasize to the parent not to share the product with the other children.</p> |

|                                                                                                                                                                                                                        |                                                                                                                                                         |
|------------------------------------------------------------------------------------------------------------------------------------------------------------------------------------------------------------------------|---------------------------------------------------------------------------------------------------------------------------------------------------------|
|                                                                                                                                                                                                                        |                                                                                                                                                         |
| <p>6. Based on your experience observing this child today, do you believe reactivity negatively impacted your ability to see the food-related behaviors of the child?</p> <p>Please explain your answer in detail.</p> | <p>No, I don't think so because the majority of the reactivity I saw had to do with the father trying to pretend that he plays with the child often</p> |

#### **NOTE**

The mother usually gives the baby the MNP in the evening and when asked why she said she does it that way because by evening time, the child would be very hungry, therefore once she gives the kunu to him, he takes it without hesitation and finishes it all.
