# Supplementary material for: Acceptance and compliance with micronutrient powder (MNP) among children aged 6–23 months in northern Nigeria
Source: PLOS journal article supplement (doi:10.1371/journal.pgph.0000961), 2022-10-17
Supplement: S8 (10.1371/journal.pgph.0000961.s008) [file journal.pgph.0000961.s008]

### 1.1.1 Instrument F –Direct Observation Form

#### <<Instrument F Direct Observation Form>>

**PI Name:** PragmaMathema,Stephen Kodish

**Study Title:** Formative research to develop an infant and young child feeding (IYCF) intervention with micronutrient powder (MNP) for children aged 6 – 23 months

**PI Version/Date:** Version1.0/January 24, 2015

Date: 23/06/15 Location: Arausaya/Jega

Data Collector: Samira Adamu

Main goals of this direct observation are to answer the following questions:

1. In this household, what would be the best way(s) to give nutritional supplements to young children? Why?
2. In this household, describe the food sharing that you observe throughout the meal. Are there any predictable patterns?
3. In this household, who is favored and how is this favoritism expressed during meal preparation and eating?

Household Composition Table (Fill out as you do data collection)

| INITIALS | SEX (M/F) | AGE (estimated) | Relationship to household | Description (not necessary)                      |
|----------|-----------|-----------------|---------------------------|--------------------------------------------------|
| BB       | F         | 21months        | Youngest child            | Baby girl with pink earrings and plump           |
| MB       | F         | 18years         | Mother                    | Medium height, dark with yellow and pink wrapper |
| FB       | M         | 22years         | Father                    | Tall dark wearing sky blue clothes               |
| B1       | M         | 5years          | Cousin                    | Wearing green and milk trousers                  |
| BB2      | F         | 2years          | Cousin                    | Slim baby girl with black rope tied to the neck  |
| DL       | F         | 20years         | Senior daughter-in law    | Yellow and brown wrapper with green              |
| CDL      | F         | 25years         | Wife of uncle             | Yellow, orange wrapper and pregnant              |
| SB       | F         | 4years          | 1 <sup>st</sup> child     | Wearing ash skirt and blue beaded necklace       |
|          |           |                 |                           |                                                  |

|  |  |  |  |  |
|--|--|--|--|--|
|  |  |  |  |  |
|--|--|--|--|--|

PARTICIPANT ID: \_\_\_\_\_

| TIME | ACTOR INITIALS | RECIPIENT INITIALS | WHAT HAPPENED                                   | FOOD        | Reactivity                                   |
|------|----------------|--------------------|-------------------------------------------------|-------------|----------------------------------------------|
| 8:00 | MB             | BB                 | Breastfeeding the baby                          | Breast milk |                                              |
| 8:05 | MB             | BB                 | Breastfeeding the baby                          | Breast milk |                                              |
| 8:10 | MB             | BB                 | Breastfeeding the baby                          | Breast milk |                                              |
| 8:15 | FB             | BB                 | Playing with the child                          |             |                                              |
| 8:20 | MB             | BB                 | Wearing pants for the child                     |             | Wearing a pant for the baby which is unusual |
| 8:25 | BB             |                    | Playing with a toy                              |             |                                              |
| 8:30 | BB             |                    | Playing with children                           |             |                                              |
| 8:35 | BB             |                    | Going out with cousin                           |             |                                              |
| 8:40 | BB             |                    | The child is crying                             |             |                                              |
| 8:45 | MB             | BB                 | Carrying the child to another side of the house |             |                                              |
| 8:50 | BB             | BB                 | Eating tuwo and miyan kadi in uncle's house     | Tuwon dawa  |                                              |
| 8:55 | BB             | BB                 | Eating tuwo and miyan kadi                      |             |                                              |
| 9:00 | BB             | BB                 | Eating tuwo and miyan kadi                      |             |                                              |
| 9:05 | BB             | BB                 | Eating tuwo and miyan kadi in uncle's house     |             |                                              |
|      | MB             |                    | Processing millet to remove shaft               | Millet      |                                              |
|      | DL             |                    | Processing millet to remove shaft               |             |                                              |
| 9:10 | MB             |                    | Fetching water from well                        |             |                                              |
|      | MB             | BB                 | Giving the child water                          | Water       |                                              |

| TIME  | ACTOR INITIALS | RECIPIENT INITIALS | WHAT HAPPENED                                                    | FOOD         | Reactivity |
|-------|----------------|--------------------|------------------------------------------------------------------|--------------|------------|
|       |                |                    |                                                                  |              |            |
| 9:15  | BB             | BB                 | Continued eating tuwo and miyan kadi in uncle's house            | Tuwon millet |            |
| 9:20  | MB             |                    | Processing millet to remove shaft                                | Millet       |            |
|       | DL             |                    | Processing millet to remove shaft                                | Millet       |            |
| 9:25  | BB             | BB                 | Eating tuwo and miyan kadi                                       |              |            |
|       | MB             |                    | Processing millet to remove shaft                                | Millet       |            |
|       | DL             |                    | Processing millet to remove shaft                                | Millet       |            |
| 9:30  | BB             |                    | Playing with ash and sand                                        |              |            |
|       | MB             |                    | Pounding the millet                                              | Millet       |            |
| 9:35  | MB             | BB                 | Backing the baby                                                 |              |            |
|       | DL             |                    | Still processing the millet to remove shaft                      | Millet       |            |
| 9:40  | MB             | BB                 | Backing the baby and removing the millet to remove shaft         | Millet       |            |
| 9:45  | MB             | BB                 | Backing the baby and removing the millet to remove shaft         | Millet       |            |
|       | DL             |                    | Processing more millet to remove shaft                           | Millet       |            |
| 9:50  | MB             | BB                 | Backing the baby and draining the washed processed millet to dry | Millet       |            |
| 9:55  | MB             | BB                 | Backing the baby and washing plates, bowls and pots              | Millet       |            |
|       | DL             |                    | Pounding millet to flour                                         | Millet       |            |
| 10:00 | BB             |                    | Sleeping on the bed                                              |              |            |
|       | DL             |                    | Pounding millet to flour                                         | Millet       |            |
|       | MB             |                    | Washing plates, bowls and pots                                   |              |            |

| TIME  | ACTOR INITIALS | RECIPIENT INITIALS | WHAT HAPPENED                                  | FOOD        | Reactivity |
|-------|----------------|--------------------|------------------------------------------------|-------------|------------|
| 10:05 | BB             |                    | Sleeping on the bed                            |             |            |
|       | MB             |                    | Washing plates and bowls                       |             |            |
| 10:10 | BB             |                    | Sleeping on the bed                            |             |            |
|       | DL             |                    | Pounding millets to flour                      | Millet      |            |
|       | MB             |                    | Draining her washed plates and bowls           |             |            |
| 10:15 | BB             |                    | Sleeping on the bed                            |             |            |
|       | MB             |                    | Sweeping the compound                          |             |            |
|       | DL             | BB2                | Backing the baby and pounding millets to flour | Millet      |            |
| 10:20 | BB             |                    | Still sleeping on the bed                      |             |            |
| 10:25 | BB             |                    | Sleeping on the bed                            |             |            |
|       | MB             |                    | Pounding millet into flour                     | Millet      |            |
|       | DL             |                    | Pounding millet into flour                     | Millet      |            |
| 10:30 | BB             |                    | Sleeping on the bed                            |             |            |
|       | ML             |                    | Checking on I and the child                    |             |            |
|       | MB&DL          |                    | Pounding millet to flour                       | Millet      |            |
| 10:35 | BB             |                    | The child is sleeping                          |             |            |
| 10:40 | MB             |                    | Pounding to the millet to powder form          | Millet      |            |
| 10:45 | BB             |                    | Sleeping in the bed                            |             |            |
| 10:50 | BB             |                    | Crying in the bed                              |             |            |
| 10:55 | MB             | BB                 | Carrying the baby and breastfeeding the child  | Breast milk |            |
|       | MB             |                    | Sieving the fine grounded millet               | Millet      |            |

| TIME  | ACTOR INITIALS | RECIPIENT INITIALS | WHAT HAPPENED                                            | FOOD        | Reactivity |
|-------|----------------|--------------------|----------------------------------------------------------|-------------|------------|
|       |                |                    | flour                                                    |             |            |
|       | DL             |                    | Pounding millet to flour                                 | Millet      |            |
| 11:00 | MB             | BB                 | Breastfeeding the child while sitting on the floor       | Breast milk |            |
| 11:05 | MB             | BB                 | Breastfeeding the child while sitting on the floor       | Breast milk |            |
| 11:10 | MB             | BB                 | Breastfeeding the child while sitting on the floor       | Breast milk |            |
| 11:15 | MB             |                    | Sieving the grounded flour to remove the coarse particle |             |            |
|       | DL             |                    | Pounding the millet                                      |             |            |
|       | BB             |                    | Playing with sand                                        | Millet      |            |
| 11:20 | BB             |                    | Playing with sand                                        |             |            |
|       | MB             |                    | Sieving the millet flour                                 | Millet      |            |
| 11:25 | BB             |                    | Playing with sand on the floor                           |             |            |
| 11:30 | MB             | BB                 | Breastfeeding the child                                  | Breast milk |            |
| 11:35 | MB             | BB                 | Giving the child water                                   |             |            |
| 11:40 | MB             | BB                 | Breastfeeding the child                                  | Breast milk |            |
| 11:45 | MB             | BB                 | Breastfeeding the child                                  | Breast milk |            |
| 11:50 | BB             |                    | Playing on the bed                                       |             |            |
|       | MB             |                    | Sleeping on the bed beside the child                     |             |            |
| 11:55 | MB             |                    | Sleeping on the bed beside the child                     |             |            |
|       | BB             |                    | Playing on the bed                                       |             |            |
| 12:00 | MB             | BB                 | Breastfeeding the child                                  | Breast milk |            |
|       | DL             |                    | Pounding millet again                                    | Millet      |            |

| TIME  | ACTOR INITIALS | RECIPIENT INITIALS | WHAT HAPPENED                                                | FOOD        | Reactivity |
|-------|----------------|--------------------|--------------------------------------------------------------|-------------|------------|
| 12:05 | MB             | BB                 | Breastfeeding the child both of them are sleeping on the bed | Breast milk |            |
|       |                | DL                 | Sieving the millet flour                                     | Millet      |            |
| 12:10 | MB             | BB                 | Breastfeeding the child both of them are sleeping on the bed | Breast milk |            |
| 12:15 | MB             | BB                 | Coming out of the room                                       |             |            |
| 12:20 | MB             | BB                 | Breastfeeding the child                                      | Breast milk |            |
| 12:25 | DL             | MB                 | Gisting with the mother                                      |             |            |
| 12:30 | MB             | BB                 | Carrying the child                                           |             |            |
|       | MB             |                    | Covering sieved flour in a calabash                          |             |            |
| 12:35 |                |                    | Playing beside her mother                                    |             |            |
| 12:40 | ML             |                    | Coming into their side                                       |             |            |
|       | MB             |                    | Carrying the child                                           |             |            |
|       | DL             |                    | Spreading the millet flour in a calabash                     | Millet      |            |
| 12:45 | ML             |                    | Playing with the child                                       |             |            |
|       | SB             | BB                 | Playing with the child                                       |             |            |
| 12:50 | BB             |                    | Playing on her mother's laps                                 |             |            |
| 12:55 | MB             |                    | Selling henna (lalle) to some girls                          |             |            |
|       | DL             | BB2                | Backing the child                                            |             |            |
| 1:00  | MB             | BB                 | Giving the child water                                       |             |            |
| 1:05  | MB             | BB                 | Giving the child biscuits                                    | Biscuits    |            |
| 1:10  | BB             | BB                 | Eating biscuits                                              | biscuits    |            |
|       | MB             | BB                 | Feeding the child biscuits                                   | biscuits    |            |

| TIME | ACTOR INITIALS | RECIPIENT INITIALS | WHAT HAPPENED                                     | FOOD        | Reactivity |
|------|----------------|--------------------|---------------------------------------------------|-------------|------------|
| 1:15 |                |                    |                                                   |             |            |
| 1:20 | MB             | BB                 | Breastfeeding the child while sitting on a stone. | Breast milk |            |
| 1:25 | MB             | BB                 | Breastfeeding the child while sitting on a stone. | Breast milk |            |

|      |    |    |                                                                      |              |  |
|------|----|----|----------------------------------------------------------------------|--------------|--|
| 1:30 | BB |    | Playing around the house alone as the mother is performing ablution. |              |  |
| 1:35 | MB | BB | Breastfeeding the child on the stool where she performed ablution.   | Breast milk  |  |
| 1:40 | MB | BB | Breastfeeding the child on the stool where she performed ablution    | Breast milk  |  |
| 1:45 | BB |    | Playing alone in the compound while the mother is praying.           |              |  |
| 1:50 | MB | BB | Carrying the child to the senior daughter in-law's side              |              |  |
| 1:55 | MB |    | Pounding millet to flour as the child is with the grandmother.       | Millet       |  |
|      | DL |    | Pounding millet to flour                                             | Millet       |  |
| 2:00 | MB |    | Sieving the millet flour to remove coarse grains.                    | Millet       |  |
|      | BB |    | Standing beside the mother as she sieve's flour.                     |              |  |
| 2:05 | MB |    | Pounding the coarse flour after sieving to extract more flour        | Millet flour |  |
|      | BB |    | Sitting close to the mother as she sieve's the flour.                |              |  |
| 2:10 | MB | BB | Still pounding the coarse flour while carrying the baby.             | Millet flour |  |
|      | BB |    | Playing around the mother                                            |              |  |
| 2:15 | MB |    | Sieving the millet flour                                             | Millet flour |  |
|      | BB |    | Wearing mother's shoe                                                |              |  |
| 2:20 | MB |    | Pounding the coarse flour after sieving to extract more flour        | Millet flour |  |
|      |    |    |                                                                      |              |  |
|      | MB |    | Making a paste of the flour with                                     | millet       |  |

|      |    |    |                                                                                               |              |  |
|------|----|----|-----------------------------------------------------------------------------------------------|--------------|--|
| 2:25 |    |    | water to form a mixture of the millet flour and water.                                        |              |  |
|      |    |    |                                                                                               |              |  |
| 2:30 | MB |    | Covering the already mixed paste properly                                                     |              |  |
|      | BB |    | Following the mother as she is covering                                                       |              |  |
| 2:35 | MB | BB | Breastfeeding the child on the floor in front of her room.                                    | Breast milk  |  |
| 2:41 | MB | BB | Breastfeeding the child on the floor in front of her room.                                    | Breast milk  |  |
| 2:41 | BB |    | Going to grand mother's side alone.                                                           |              |  |
| 2:45 | SB | BB | Playing with the child                                                                        |              |  |
| 2:50 | SB | BB | Playing with the grandmother and sister                                                       |              |  |
| 2:50 | SB | BB | Drinking kunu millet, she gave the child and continued drinking                               | Kunun millet |  |
| 2:55 | BB | BB | Drinking kunu by herself                                                                      | Kunun millet |  |
| 3:00 | BB | BB | Drinking kunun millet by herself                                                              | Kunun millet |  |
| 3:05 | MB | BB | Breastfeeding the child at the grandmother's side in the house                                | Breast milk  |  |
| 3:10 | MB | BB | Breastfeeding the child while sitting on the mat.                                             | Breast milk  |  |
| 3:15 | MB |    | Processing sorghum for the tuwo by the removing the shaft.                                    |              |  |
|      | BB |    | Standing close to the mother as she process the sorghum.                                      |              |  |
| 3:20 | MB |    | Processing the sorghum for tuwo                                                               |              |  |
|      | BB |    | Playing with her sister                                                                       |              |  |
| 3:25 | BB |    | Sitting with the grandmother in her side.                                                     |              |  |
|      | MB |    | Processing sorghum to remove shaft.                                                           |              |  |
| 3:30 | MB |    | Processing another sorghum to remove shaft by gentle pounding of the grains against tomorrow. | Sorghum      |  |



|      |       |     |                                                                      |              |  |
|------|-------|-----|----------------------------------------------------------------------|--------------|--|
| 3:35 | BB    |     | Playing with the sister                                              |              |  |
|      | MB&DL |     | Processing the sorghum to remove the shaft from the grain            |              |  |
|      |       |     |                                                                      |              |  |
| 3:40 | SB    | BB  | Sister trying to remove charcoal from the sister's mouth             |              |  |
|      | ML    | BB  | Removing the charcoal from the mouth.                                |              |  |
|      | MB    |     | Processing to remove shaft from the sorghum.                         |              |  |
|      | DL    |     | Also processing to remove sorghum shaft from the sorghum.            |              |  |
| 3:45 | MB    | BB  | Breastfeeding the baby while sitting on the floor.                   | Breast milk  |  |
|      | DL    | BB2 | Giving her meat to eat.                                              |              |  |
| 3:50 | BB    |     | Playing with a stick                                                 |              |  |
|      | B1    | B1  | Taking/drinking kunu by herself.                                     | Kunun millet |  |
| 3:55 | MB    | BB  | Breastfeeding the baby while standing.                               | Breast milk  |  |
| 4:05 | MB    | BB  | Breastfeeding the baby while standing.                               | Breast milk  |  |
| 4:10 | MB    | BB  | Breastfeeding the baby while standing.                               | Breast milk  |  |
| 4:15 | MB    |     | Processing sorghum to remove shaft by gentle pounding.               | Sorghum      |  |
|      | BB    |     | Playing with a stick                                                 |              |  |
| 4:20 | MB    |     | Processing sorghum to remove shaft by gentle pounding.               | Sorghum      |  |
|      | BB    |     | Playing with stick                                                   |              |  |
| 4:25 | BB&SB |     | Drinking kunu millet                                                 | Kunun millet |  |
|      | MB    |     | Processing sorghum to remove shaft                                   | Sorghum      |  |
| 4:30 | MB    |     | Washing the processed sorghum and draining it to dry before pounding | Sorghum      |  |

|      |          |     |                                                                                |              |  |
|------|----------|-----|--------------------------------------------------------------------------------|--------------|--|
|      | BB       |     | Stooling on the floor                                                          |              |  |
| 4:35 | BB&SB    |     | Playing together as mother is praying                                          |              |  |
| 4:40 | BB,SB&B1 |     | Playing together with sticks                                                   |              |  |
|      | MB       |     | Spreading the drained sorghum to air dry well                                  | Sorghum      |  |
|      | DL       |     | Taking a nap                                                                   |              |  |
|      | ML       |     | Sweeping animal waste(feaces)                                                  |              |  |
| 4:45 | MB       | BB  | Breastfeeding the child                                                        | Breast milk  |  |
| 4:50 | MB       | BB  | Breastfeeding the child                                                        | Breast milk  |  |
| 4:55 | BB       |     | She is crying and the mother is in the toilet.                                 |              |  |
| 5:00 | MB       | BB  | Giving her water                                                               | Water        |  |
| 5:05 | MB       | BB  | Breastfeeding the child                                                        | Breast milk  |  |
| 5:10 | BB       | BB2 | Playing with her on the mat                                                    |              |  |
|      | MB       |     | removing dirty particles from the dried sorghum                                |              |  |
| 5:15 | DL       |     | Washing plates and bowls                                                       |              |  |
|      | BB       |     | The baby is crying                                                             |              |  |
|      | MB       |     | Applying charcoal to an old wound                                              |              |  |
| 5:20 | BB       |     | Playing with the charcoal                                                      |              |  |
| 5:25 | MB       | BB  | Breastfeeding the child while sitting on the mat.                              | Breast milk  |  |
| 5:30 | MB       | BB  | Breastfeeding the child le sitting on the mat.                                 | Breast milk  |  |
| 5:35 | MB       |     | Adding a sachet of MNP to cold kunun which was brought from a neighbor's house | Kunun millet |  |
| 5:40 | MB       | BB  | Forcibly feeding the child with MNP mixed portion as she want to take          | Kunun millet |  |

|      |     |  |                                                                                             |                      |  |
|------|-----|--|---------------------------------------------------------------------------------------------|----------------------|--|
|      |     |  | the kunu herself. She finished the kunun mixed with the MNP although it poured on her body. |                      |  |
| 5:45 | BB  |  | Crying because she was forced to take the kunu                                              | Kunun millet         |  |
| 5:50 | BB  |  | Drinking kunu                                                                               | Kunun millet         |  |
| 5:55 | BB  |  | Playing with sticks                                                                         |                      |  |
| 6:00 | BB2 |  | Eating bulla and miyan kadi                                                                 | Bulla and miyan kadi |  |
|      | BB  |  | Playing with a stick                                                                        |                      |  |
|      |     |  |                                                                                             |                      |  |
|      |     |  |                                                                                             |                      |  |

Primary Questions (Complete after you complete data collection):

From what you have seen observing THIS HOUSEHOLD, please answer the following questions in detail:

| Question                                                                                                                                                      | Write your <u>detailed</u> response here                                                                                                                                                                                                                                                    |
|---------------------------------------------------------------------------------------------------------------------------------------------------------------|---------------------------------------------------------------------------------------------------------------------------------------------------------------------------------------------------------------------------------------------------------------------------------------------|
| <p>1. In this household, what would be the best way(s) to give nutritional supplements such as an MNP to young children to ensure compliance?</p> <p>Why?</p> | <p>The mother is the best way to give this supplement.</p> <p>I observed that the child is always with the mother and she barely stays away from the mother. Because of this, I suggest the mother is the best way to ensure compliance</p>                                                 |
| <p>2. In this household, who is favored during meal preparation or feeding?</p>                                                                               | <p>As far as I am concerned, there is no favoritism expressed among the family members especially the children and throughout my stay all the children did not eat together, except for the first and second child when they took kunu together and the first child gave the baby once.</p> |

|                                                                                                                                        |                                                                                                                                                                                                                                                                                                                                                                                                                                                                                                                                                                                                                                                                                      |
|----------------------------------------------------------------------------------------------------------------------------------------|--------------------------------------------------------------------------------------------------------------------------------------------------------------------------------------------------------------------------------------------------------------------------------------------------------------------------------------------------------------------------------------------------------------------------------------------------------------------------------------------------------------------------------------------------------------------------------------------------------------------------------------------------------------------------------------|
| How is this favoritism expressed?                                                                                                      |                                                                                                                                                                                                                                                                                                                                                                                                                                                                                                                                                                                                                                                                                      |
| <p>3. How could we promote the MNP supplement for this family that would attract their attention?</p> <p>Who would they listen to?</p> | <p>It should be promoted by giving the caregivers along with eating utensils and/some incentives (like biscuits).because there is inequality among the daughter in -laws. Also there was more preference on the care giver whose child was 2 years old. She is given more attention and favored her children in terms of food. There is envy and jealousy expressed by the senior daughter in-law over the caregiver to whom MNP was issued.</p> <p>They will listen to their husbands because the women are answerable to their husbands. Maybe the mother in-law although she is treating the in-laws like friends and as such I don't know if they will be answerable to her.</p> |
| <p>4. In this household, what would be the best ways to promote the MNP but limit how much it would be shared?</p> <p>Why?</p>         | <p>There should be proper sensitization on the usage, direction of usage as well as importance of the MNP and the need not to share. The little children eat separately so there will be no sharing involved during eating.</p> <p>There are four caregivers, so if each caregiver is given the MNP because three of them have children of 6-23months, then probably, sharing would be limited and it should be presented to them more or less like medicine. With this, it will let them not to allow other children use it.</p>                                                                                                                                                    |
| 5. What other issues and concerns did you see with this family that are important                                                      | Improper hygiene is practiced in the house as the farm animals could eat directly from the plates of the children. Hence, if MNP is administered into the child's food, and any of the farm animals                                                                                                                                                                                                                                                                                                                                                                                                                                                                                  |

|                                                                                                                                                                                                                        |                                                                                                                                                                                                                                                                                                                                                                                                                  |
|------------------------------------------------------------------------------------------------------------------------------------------------------------------------------------------------------------------------|------------------------------------------------------------------------------------------------------------------------------------------------------------------------------------------------------------------------------------------------------------------------------------------------------------------------------------------------------------------------------------------------------------------|
| <p>for us to consider with regard to introduction of an MNP?</p> <p>Why?</p>                                                                                                                                           | <p>accidentally feed on the food, since the little children are allowed to feed themselves, then the aim is not achieved and sharing is not hindered.</p> <p>Also the consistency and temperature of the food served with MNP needs to be explained properly. Because, she added MNP to cold kunu which was insoluble and I think this made the child not to drink the kunu.</p>                                 |
| <p>6. Based on your experience observing this child today, do you believe reactivity negatively impacted your ability to see the food-related behaviors of the child?</p> <p>Please explain your answer in detail.</p> | <p>No I don't think so, because the child was allowed to eat just as she does even in my absence.</p> <p>Because, when she eating tuwo and miyan kadi in uncle's house, I just entered without them knowing I was coming so she exhibited her actual eating behavior with no reactivity. They were very free with me so there was no reactive behavior recorded in the household concerning eating behavior.</p> |
