# Supplementary material for: Acceptance and compliance with micronutrient powder (MNP) among children aged 6–23 months in northern Nigeria
Source: PLOS journal article supplement (doi:10.1371/journal.pgph.0000961), 2022-10-17
Supplement: S8 (10.1371/journal.pgph.0000961.s008) [file journal.pgph.0000961.s008]

### 1.1.1 Instrument F –Direct Observation Form

#### <<Instrument F Direct Observation Form>>

**PI Name:** PragmaMathema,Stephen Kodish

**Study Title:** Formative research to develop an infant and young child feeding (IYCF) intervention with micronutrient powder (MNP) for children aged 6 – 23 months

**PI Version/Date:** Version1.0/January 24, 2015

Date: 28<sup>TH</sup> JUNE, 2015 Location: GUGU, GUYUK L.G.A

Data Collector: ANTIYA SANDA Participant ID: A HOUSE NEAR A GRINDING MACHINE

Main goals of this direct observation are to answer the following questions:

1. In this household, what would be the best way(s) to give nutritional supplements to young children? Why?
2. In this household, describe the food sharing that you observe throughout the meal. Are there any predictable patterns?
3. In this household, who is favored and how is this favoritism expressed during meal preparation and eating?

(TEAR OFF AT PERFORATED DOTTED LINE BELOW)

-----

PARTICIPANT ID: \_\_\_\_\_

Household Composition Table (Fill out as you do data collection)

| INITIALS | SEX<br>(M/F) | AGE<br>(estimated) | Relationship to<br>household | Description                                 |
|----------|--------------|--------------------|------------------------------|---------------------------------------------|
| FB       | M            | 40 YEARS           | HUSBAND                      | A FAT BLACK MAN IN HIS MIDDLE 40'S          |
| TF       | F            | 33 YEARS           | WIFE                         | A TALL FAIR WOMAN WEARING AN ORANGE WRAPPER |
| CB       | F            | 6 MONTHS           | DAUGHTER                     | A CUTE LITTLE BABY                          |
| SL       | M            | 25 YEARS           | RELATIVE                     | A SLIM YOUNG BOY WEARING A LONG TROUSER     |
| SW       | F            | 30 YEARS           | RELATIVE                     | A SLIM WOMAN WEARING A PINK BLOUSE.         |
|          |              |                    |                              |                                             |
|          |              |                    |                              |                                             |

|  |  |  |  |  |
|--|--|--|--|--|
|  |  |  |  |  |
|  |  |  |  |  |
|  |  |  |  |  |
|  |  |  |  |  |
|  |  |  |  |  |
|  |  |  |  |  |
|  |  |  |  |  |
|  |  |  |  |  |
|  |  |  |  |  |

PARTICIPANT ID: \_\_\_\_\_

| TIME | ACTOR INITIALS | RECIPIENT INITIALS | WHAT HAPPENED                              | FOOD  | Reactivity |
|------|----------------|--------------------|--------------------------------------------|-------|------------|
| 8:00 | TF             |                    | IS SWEEPING THE HOUSE                      |       |            |
| 8:05 | TF             |                    | IS SWEEPING THE HOUSE                      |       |            |
| 8:10 | FB, CB         |                    | IS CARRYING THE BABY ON HIS ARM            |       |            |
| 8:15 | TF             |                    | GATHERS PLATES TO WASH                     |       |            |
| 8:20 | TF             |                    | IS WASHING THE DIRTY PLATES                |       |            |
| 8:25 | TF             |                    | STARTS MAKING FIRE                         |       |            |
| 8:30 | TF             |                    | CARRYS A POT AND POURS WATER INTO IT       | WATER |            |
| 8:35 | TF             |                    | PUTS THE POT WITH WATER INSIDE ON THE FIRE | WATER |            |
| 8:40 | TF             |                    | COVERS THE POT                             |       |            |
| 8:45 | TF             |                    | BRINGS A SMALL BUCKET                      |       |            |
| 8:50 | TF             |                    | POURS HOT WATER INTO THE                   |       |            |

| TIME  | ACTOR INITIALS | RECIPIENT INITIALS | WHAT HAPPENED                                                                                | FOOD                                  | Reactivity |
|-------|----------------|--------------------|----------------------------------------------------------------------------------------------|---------------------------------------|------------|
|       |                |                    | BUCKET                                                                                       |                                       |            |
| 8:55  | TF             |                    | MIXES HOT WATER AND COLD WATER IN A BUCKET                                                   | WATER                                 |            |
| 9:00  | TF             |                    | BRING A HOT WATER FLASK                                                                      |                                       |            |
| 9:05  | TF             |                    | POURS HOT WATER INTO THE FLASK                                                               |                                       |            |
| 9:10  | TF             |                    | CARRYS THE BUCKET OF HOT AND COLD WATER                                                      |                                       |            |
| 9:15  | TF, CB         |                    | COLLECT THE BABY FROM THE FATHER                                                             |                                       |            |
| 9:20  | TF             | CB                 | IS REMOVING HER BABY'S CLOTHE                                                                |                                       |            |
| 9:25  | TF             | CB                 | STARTS BATHING THE BABY                                                                      |                                       |            |
| 9:30  | TF             | CB                 | IS BATHING THE BABY WITH BATHING SOAP AND SPONGE                                             |                                       |            |
| 9:35  | TF             | CB                 | IS CLEANING THE BABY'S BODY WITH A TOWEL                                                     |                                       |            |
| 9:40  | TF             | CB                 | STARTS APPLYING CREAM ON THE BODY OF THE BABY                                                |                                       |            |
| 9:45  | TF             |                    | GIVES THE BABY TO THE FATHER                                                                 |                                       |            |
| 9:55  | TF             |                    | BRINGS THE HOT WATER FLASK AND POUR WATER INTO THE POT                                       |                                       |            |
| 10:00 | TF             |                    | BRINGS GUINEA CORN FLOUR, SOYA BEANS FLOUR AND GROUNDNUT PASTE                               | GUINEA CORN, SOYA BEAN AND GROUNDNUT  |            |
| 10:01 | TF             |                    | STARTS MIXING THE GUINEA CORN FLOUR, SOYA BEANS FLOUR AND GROUNDNUT PASTE TOGETHER IN A BOWL | GUINEA CORN, SOYA BEANS AND GROUNDNUT |            |
| 10:02 | TF             |                    | POURS WATER INTO THE POT ON THE FIRE                                                         | GUINEA CORN, SOYA BEANS AND GROUNDNUT |            |
| 10:03 | TF             |                    | STARTS STIRRING THE MIXTURE ON THE FIRE                                                      | GUINEA CORN, SOYA BEANS AND GROUNDNUT |            |

| TIME  | ACTOR INITIALS | RECIPIENT INITIALS | WHAT HAPPENED                                                                             | FOOD                                  | Reactivity |
|-------|----------------|--------------------|-------------------------------------------------------------------------------------------|---------------------------------------|------------|
| 10:04 | TF             |                    | CONTINUES TO STIR THE GUINEA CORN FLOUR, SOYA BEANS FLOUR AND THE GROUNDNUT PASTE TOGETHE | GUINEA CORN, SOYA BEANS AND GROUNDNUT |            |
| 10:05 | TF             |                    | BRINGS A SMALL CUP                                                                        |                                       |            |
| 10:06 | TF             |                    | FETCHES THE KUNU INTO A SMALL CUP                                                         | GUINEA CORN                           |            |
| 10:07 | TF             |                    | KEEPS THE SMALL CUP ON THE GROUND                                                         |                                       |            |
| 10:08 | TF             |                    | BRINGS THE POT DOWN FROM THE FIRE                                                         |                                       |            |
| 10:09 | TF             |                    | PICKS THE SMALL CUPP WITH KUNU INSIDE AND BEGINS TO STIR USING A SPOON                    |                                       |            |
| 10:10 | TF             |                    | GOES INTO THE ROOM TO BRING THE MNP                                                       |                                       |            |
| 10:15 | TF             |                    | ALLOWS THE KUNU TO GET COLD BEFORE UNSEALING THE MNP                                      |                                       |            |
| 10:20 | TF             |                    | TASTE THE KUNU TO KNOW IF IT IS COLD BEFORE POURING THE MNP                               |                                       |            |
| 10:25 | TF             |                    | POURS MNP INTO THE KUNU                                                                   | MNP AND GUINEA CORN                   |            |
| 10:30 | TF             |                    | STARTS MIXING THE MNP INTO THE KUNU                                                       |                                       |            |
| 10:35 | TF             |                    | LOOKS INTO THE CUP AND DISCOVER THAT THE MNP HAS BLENDED WELL WITH THE KUNU               | GUINEA CORN AND MNP                   |            |
| 10:40 | TF             |                    | COLLECTS THE BABY FROM THE FATHER                                                         |                                       |            |
| 10:45 | TF             | CB                 | STARTS FEEDING THE BABY WITH THE KUNU MIXED WITH THE MNP                                  | GUINEA CORN AND MNP                   |            |
| 10:50 | TF             | CB                 | IS FEEDING THE BABY WITH THE KUNU                                                         | GUINEA CORN AND MNP                   |            |
| 10:55 | TF             | CB                 | IS FEEDING THE BABY WITH THE KUNU                                                         | GUINEA CORN AND                       |            |

| TIME  | ACTOR INITIALS | RECIPIENT INITIALS | WHAT HAPPENED                                                     | FOOD                | Reactivity |
|-------|----------------|--------------------|-------------------------------------------------------------------|---------------------|------------|
|       |                |                    |                                                                   | MNP                 |            |
| 11:00 | TF             | CB                 | GIVES THE BABY THE LAST SPOON                                     | GUINEA CORN AND MNP |            |
| 11:05 | TF             |                    | DROPS THE EMPTY CUP OF KUNUON THE GROUND                          |                     |            |
| 11:10 | CB             |                    | DRANK ALL OF HER KUNU                                             | GUINEA CORN AND MNP |            |
| 11:15 | TF             | CB                 | CARRYS THE BABY AND GIVES TO THE FATHER                           |                     |            |
| 11:20 | TF             |                    | FETCHES WATER IN A BUCKET                                         |                     |            |
| 11:25 | TF             |                    | GOES TO THE BATHROOM                                              |                     |            |
| 11:30 | FB             | CB                 | THE DAD IS WEARING THE BABY CLOTHES                               |                     |            |
| 11:35 | FB             | CB                 | THE DAD IS WEARING THE BABY CLOTHES AND IS PLAYING WITH THE CHILD |                     |            |
| 11:40 | TF             |                    | COMES OUT OF THE ROOM WELL DRESSED                                |                     |            |
| 11:45 | TF             |                    | BIDS THE DAD AND THE DAUGHTER FAREWELL AND LEAVES FOR CHURCH      |                     |            |
| 11:50 | FB             | CB                 | CARRYS THE BABY INSIDE THE ROOM AND KEPT HER ON THE MAT           |                     |            |
| 11:55 | CB             |                    | STARTS PLAYING WITH HER TOYS                                      |                     |            |
| 12:00 | CB             |                    | IS PLAYING ON THE MAT                                             |                     |            |
| 12:05 | CB             |                    | PLAYING                                                           |                     |            |
| 12:10 | CB             |                    | PLAYING                                                           |                     |            |
| 12:15 | CB             |                    | PLAYING                                                           |                     |            |
| 12:20 | CB             |                    | STARTS CRYING                                                     |                     |            |
| 12:25 | FB             | CB                 | CARRYS THE BABY ON THE ARM                                        |                     |            |

| TIME  | ACTOR INITIALS | RECIPIENT INITIALS | WHAT HAPPENED                                                       | FOOD  | Reactivity |
|-------|----------------|--------------------|---------------------------------------------------------------------|-------|------------|
|       |                |                    |                                                                     |       |            |
| 12:30 | FB             |                    | BRINGS A CUP AND SPOON                                              |       |            |
| 12:31 | FB             |                    | BRINGS THE HOT WATER FLASK                                          | WATER |            |
| 12:32 | FB             |                    | POURS HOT WATER INTO A BABY'S FEEDING BOTTLE                        | WATER |            |
| 12:33 | FB             |                    | BRINGS A CONTAINER OF POWDERED MILK (NAN)                           | MILK  |            |
| 12:34 | FB             |                    | FETCHES 3 SPOONS OF NAN AND POURS INTO THE BABY'S FEEDING BOTTLE    |       |            |
| 12:35 | FB             |                    | BEGINS TO SHAKE THE BABY'S FEEDING BOTTLE                           | MILK  |            |
| 12:40 | FB             | CB                 | CARRY'S BABY ON THE LAP                                             |       |            |
| 12:45 | FB             | CB                 | STARTS FEEDING THE BABY WITH THE POWDERED MILK MIXED WITH HOT WATER | MILK  |            |
| 12:50 | FB             | CB                 | CONTINUES TO FEED THE BABY USING AN INFANT FEEDING BOTTLE           | MILK  |            |
| 12:55 | FB             | CB                 | IS FEEDING THE BABY                                                 | MILK  |            |
| 1:00  | CB             |                    | STARTS SLEEPING ON THE FATHERS LAP                                  |       |            |
| 1:05  | FB             | CB                 | CARRYS THE BABY ON THE ARMS                                         |       |            |
| 1:10  | FB             | CB                 | LAYS THE BABY ON THE MAT                                            |       |            |
| 1;10  | CB             |                    | IS SLEEPING                                                         |       |            |
| 1;15  | CB             |                    | IS SLEEPING                                                         |       |            |
| 1:20  | CB             |                    | IS SLEEPING                                                         |       |            |
| 1:25  | CB             |                    | IS SLEEPING                                                         |       |            |
| 1:30  | CB             |                    | IS SLEEPING                                                         |       |            |
| 1:35  | CB             |                    | SLEEPING                                                            |       |            |

| TIME | ACTOR INITIALS | RECIPIENT INITIALS | WHAT HAPPENED                                  | FOOD                | Reactivity |
|------|----------------|--------------------|------------------------------------------------|---------------------|------------|
|      |                |                    |                                                |                     |            |
| 1:40 | CB             |                    | SLEEPING                                       |                     |            |
| 1:45 | CB             |                    | SLEEPING                                       |                     |            |
| 1:50 | CB             |                    | SLEEPING                                       |                     |            |
| 1:55 | CB             |                    | SLEEPING                                       |                     |            |
| 2:00 | CB             |                    | SLEEPING                                       |                     |            |
| 2:05 | CB             |                    | SLEEPING                                       |                     |            |
| 2:10 | TF             |                    | WALKS INTO THE HOUSE                           |                     |            |
| 2:15 | TF             |                    | GOES INTO THE ROOM                             |                     |            |
| 2:20 | TF             |                    | COMES OUT OF THE ROOM                          |                     |            |
| 2:25 | TF             | CB                 | COVERS HER BABY WITH A WRAPPER                 |                     |            |
| 2:30 | TF             |                    | STARTS MAKING FIRE                             |                     |            |
| 2:31 | TF             |                    | PUTS A POT ON THE FIRE                         |                     |            |
| 2:32 | TF             |                    | POURS PALM OIL INTO THE EMPTY POT ON THE FIRE  | PALM OIL            |            |
| 2:33 | TF             |                    | PICKS AN ONION AND STARTS SLICING IT           | ONION               |            |
| 2:34 | TF             |                    | POURS ONIONS INTO THE HOT PALM OIL             | PALM OIL            |            |
| 2:35 | TF             |                    | USES A SPOON TO STIR THE ONIONS AND PALM OIL   | PALM OIL AND ONIONS |            |
| 2:40 | TF             |                    | BRINGS SOME TINY DRY FISH                      | FISH                |            |
| 2:41 | TF             |                    | CHOPS THE DRY FISH INTO THE POT ANDPOURS WATER | FISH AND WATER      |            |
| 2:42 | TF             |                    | ADDS SEASONING INTO THE POT                    | MAGGI               |            |
| 2:43 | TF             |                    | ADDS SALT INTO THE POT                         | SALT                |            |
| 2:44 | TF             |                    | COVERS THE POT                                 |                     |            |

| TIME | ACTOR INITIALS | RECIPIENT INITIALS | WHAT HAPPENED                                                     | FOOD            | Reactivity |
|------|----------------|--------------------|-------------------------------------------------------------------|-----------------|------------|
|      |                |                    |                                                                   |                 |            |
| 2:45 | TF             |                    | BRINGS A BIG BOWL OF MAIZE FLOUR                                  | MAIZE           |            |
| 2:50 | TF             |                    | STARTS SIEVING MAIZE FLOUR                                        | MAIZE           |            |
| 2:55 | TF             |                    | CONTINUES TO SIEVE THE MAIZE FLOUR                                | MAIZE           |            |
| 2:56 | SW             |                    | WALKS INTO THE HOUSE AND HELPS THE WIFE TO SIEVE                  |                 |            |
| 2:57 | SW             |                    | IS SIEVING THE MAIZE FLOUR                                        | MAIZE           |            |
| 2:58 | TF             |                    | OPENS THE POT ON THE FIRE AND TAST THE FISH TO KNOW IF IT IS SOFT | FISH            |            |
| 2:59 | TF             |                    | STARTS POURING DRY OKRO INTO THE POT ON THE FIRE                  | OKRO            |            |
| 3:00 | TF             |                    | IS POURING DRY OKRO AND STIRRING THE SOUP                         | OKRO            |            |
| 3:01 | TF             |                    | IS STIRRING THE OKRO SOUP                                         | OKRO            |            |
| 3:02 | TF             |                    | BRINGS DOWN THE SOUP POT FROM THE FIRE                            | OKRO            |            |
| 3:03 | TF             |                    | COVERS THE POT                                                    |                 |            |
| 3:04 | TF             |                    | POURS WATER INTO ANOTHER EMPTY POT                                | WATER           |            |
| 3:05 | TF             |                    | PUTS THE EMPTY POT WITH WATER ON THE FIRE                         | WATER           |            |
| 3:06 | TF             |                    | COVERS THE POT ON THE FIRE                                        |                 |            |
| 3:07 | TF             |                    | FETCHES THE SIEVED MAIZE FLOUR IN A BOWL AND POURS WATER ON IT    | MAIZE AND WATER |            |
| 3:08 | TF             |                    | POURS MIXED MAIZE WITH WATER INTO THE HOT WATER ON THE FIRE       | MAIZE AND WATER |            |
| 3:09 | TF             |                    | USES A STICK TO MIX THE MAIZE ON THE FIRE                         |                 |            |
| 3:10 | TF             |                    | REMOVES THE STICK AND COVERS THE POT                              |                 |            |
| 3:11 | TF             |                    | GOES INTO THE KITCHEN TO BRING FOOD WARMERS AND A SERVING PLATE   |                 |            |
| 3:12 | TF             |                    | OPENS THE POT ON THE FIRE AND POURS MAIZE FLOUR INTO              |                 |            |



| TIME | ACTOR INITIALS | RECIPIENT INITIALS | WHAT HAPPENED                                                  | FOOD           | Reactivity |
|------|----------------|--------------------|----------------------------------------------------------------|----------------|------------|
|      |                |                    | IT                                                             |                |            |
| 3:13 | TF             |                    | STARTS MIXING THE MAIZE FLOUR FASTER                           |                |            |
| 3:14 | TF             |                    | CONTINUES TO MIX THE MAIZE FLOUR FAST                          |                |            |
| 3:15 | TF             |                    | IS MIXING THE MAIZE INTO TUWO                                  |                |            |
| 3:16 | TF             |                    | REMOVES THE TUWO STICK                                         |                |            |
| 3:17 | TF             |                    | STARTS SERVING TUWO INTO THE FOOD WARMER                       |                |            |
| 3:18 | TF             |                    | IS SERVING THE TUWO INTO A PLATE                               |                |            |
| 3:19 | TF             |                    | COVERS THE FOOD WARMER                                         |                |            |
| 3:20 | TF             |                    | BRINGS THE POT DOWN FROM THE FIRE                              |                |            |
| 3:21 | TF             |                    | POURS WATER INTO THE EMPTY POT                                 |                |            |
| 3:22 | TF             |                    | OPENS THE POT OF SOUP                                          | OKRO           |            |
| 3:23 | TF             |                    | SERVES THE SOUP INTO A SMALL SOUP BOWL                         | OKRO           |            |
| 3:24 | TF             |                    | TAKES THE SOUP BOWL AND THE FOOD WARMER TOGETHER INTO THE ROOM |                |            |
| 3:25 | TF             |                    | SERVES HER HUSBAND THE FOOD AND COLECTS THE BABY FROM HIM      | OKRO AND MAIZE |            |
| 3:30 | TF             |                    | COMES OUT OF THE ROOM CARRYING HER BABY                        |                |            |
| 3:35 | TF             | SW                 | CARRY'S A PLATE OF TUWO AND GIVES HER RELATIVE                 | OKRO AND MAIZE |            |
| 3:40 | TF             |                    | GOES INTO THE ROOM                                             |                |            |
| 3:45 | TF, FB         |                    | STARTS EATING TOGETHER                                         | OKRO AND MAIZE |            |
| 3:50 | TF, FB         |                    | ARE EATING TUWO TOGETHER                                       | OKRO AND MAIZE |            |
| 3:55 | TF, FB         |                    | ARE EATING TOGETHER AND CHATTING                               | OKRO AND MAIZE |            |
| 4:00 | TF, FB         |                    | ARE EATING TOGETHER                                            | OKRO AND MAIZE |            |
| 4:05 | TF, FB         |                    | ARE EATING TOGETHER                                            | OKRO AND MAIZE |            |

| TIME | ACTOR INITIALS | RECIPIENT INITIALS | WHAT HAPPENED                                                                      | FOOD           | Reactivity |
|------|----------------|--------------------|------------------------------------------------------------------------------------|----------------|------------|
| 4:10 | TF, FB         |                    | ARE EATING TOGETHER                                                                | OKRO AND MAIZE |            |
| 4:15 | TF, FB         |                    | ARE EATING TOGETHER                                                                | OKRO AND MAIZE |            |
| 4:20 | TF, FB         |                    | ARE EATING TOGETHER                                                                | OKRO AND MAIZE |            |
| 4:25 | TF, FB         |                    | ARE EATING TOGETHER                                                                | OKRO AND MAIZE |            |
| 4:30 | TF             |                    | STARTS PACKING THE EMPTY PLATES                                                    |                |            |
| 4:35 | TF             |                    | TAKES EMPTY PLATES OUTSIDE                                                         |                |            |
| 4:40 | TF             |                    | KEEPS EMPTY PLATES IN THE KITCHEN                                                  |                |            |
| 4:45 | TF, SW         |                    | STARTS CHATTING                                                                    |                |            |
| 4:50 | TF, SW         |                    | CHATTING TOGETHER                                                                  |                |            |
| 4:55 | TF, SW         |                    | CHATTING TOGETHER                                                                  |                |            |
| 5:00 | TF, SW         |                    | CHATTING TOGETHER                                                                  |                |            |
| 5:10 | TF, SW         |                    | CHATTING TOGETHER                                                                  |                |            |
| 5:15 | TF             |                    | BRINGS A HOT WATER FLASK                                                           | WATER          |            |
| 5:20 | TF             |                    | POURS HOT WATER INTO THE BABY'S FEEDING BOTTLE AND ADD POWDERED MILK AND SHAKES IT | MILK           |            |
| 5:25 | TF             | CB                 | CARRYS HER BABY ON THE LAP                                                         |                |            |
| 5:30 | TF             | CB                 | STARTS FEEDING HER CHILD WITH MILK                                                 |                |            |
| 5:35 | TF             | CB                 | IS FEEDING THE BABY                                                                |                |            |
| 5:40 | CB             |                    | STARTS SLEEPING                                                                    |                |            |
| 5:45 | TF             | CB                 | CARRYS HER CHILD TO THE ROOM                                                       |                |            |
| 5:50 | CB             |                    | IS SLEEPING                                                                        |                |            |
| 5:55 | CB             |                    | IS SLEEPING                                                                        |                |            |
| 6:00 | CB             |                    | IS SLEEPING                                                                        |                |            |
| 6:05 | TF             |                    | COMES OUT OF THE ROOM AND CONTINUES TO CHAT WITH HER RELATIVE                      |                |            |
|      |                |                    |                                                                                    |                |            |
|      |                |                    |                                                                                    |                |            |
|      |                |                    |                                                                                    |                |            |
|      |                |                    |                                                                                    |                |            |
|      |                |                    |                                                                                    |                |            |



[illegible]

[illegible]

[illegible]

[illegible]

[illegible]



[illegible]

[illegible]

[illegible]

[illegible]

[illegible]

|  |  |  |  |  |  |
|--|--|--|--|--|--|
|  |  |  |  |  |  |
|  |  |  |  |  |  |
|  |  |  |  |  |  |
|  |  |  |  |  |  |
|  |  |  |  |  |  |
|  |  |  |  |  |  |
|  |  |  |  |  |  |
|  |  |  |  |  |  |
|  |  |  |  |  |  |
|  |  |  |  |  |  |
|  |  |  |  |  |  |
|  |  |  |  |  |  |

PARTICIPANT ID: \_\_\_\_\_

Primary Questions (Complete after you complete data collection):

From what you have seen observing THIS HOUSEHOLD, please answer the following questions in detail:

| Question                                                                                                                                                      | Write your <u>detailed</u> response here                                                                                                                                                                                                                                                                                                                       |
|---------------------------------------------------------------------------------------------------------------------------------------------------------------|----------------------------------------------------------------------------------------------------------------------------------------------------------------------------------------------------------------------------------------------------------------------------------------------------------------------------------------------------------------|
| <p>1. In this household, what would be the best way(s) to give nutritional supplements such as an MNP to young children to ensure compliance?</p> <p>Why?</p> | <p>The best way to give the MNP to the young child in this household would be in the morning. That is when the child will be hungry and would comply easily.</p> <p>The young child here wakes up very hungry and does not reject the kunu given to her, because when she is filled with her milk, she wouldn't agree to eat any other complimentary food.</p> |
| 2. In this household, who is                                                                                                                                  | The husband as the head of the house is favoured during the meal                                                                                                                                                                                                                                                                                               |

|                                                                                                                                                                |                                                                                                                                                                                                                                                                                                                                                                                                                                                                                 |
|----------------------------------------------------------------------------------------------------------------------------------------------------------------|---------------------------------------------------------------------------------------------------------------------------------------------------------------------------------------------------------------------------------------------------------------------------------------------------------------------------------------------------------------------------------------------------------------------------------------------------------------------------------|
| <p>avored during meal preparation or feeding?</p> <p>How is this favoritism expressed?</p>                                                                     | <p>preparation and the wife also favours herself.</p> <p>The husband is served the large share together with the wife because they eat together on the same plate. So the wife serves the larger share to herself and the husband before serving other relatives.</p>                                                                                                                                                                                                           |
| <p>3. How could we promote the MNP supplement for this family that would attract their attention?</p> <p>Who would they listen to?</p>                         | <p>The MNP should be promoted through the father and the mother also because both of them participate in the feeding and upbringing of their baby.</p> <p>The baby will listen to both the father and the mother because she is just a little baby and she is already used to the dad and mum. Whatever the dad or mum gives to her, she easily accepts it without rejecting or crying.</p>                                                                                     |
| <p>4. In this household, what would be the best ways to promote the MNP but limit how much it would be shared?</p> <p>Why?</p>                                 | <p>In this household, the best way to promote the MNP would be through the dad because he is aware of everything that happens in the house. MNP could not likely to be shared in this household because the parents are educated and know the instruction written on the MNP pamphlet.</p> <p>The parents of this young child are educated and already know how the MNP should be used and the instruction that it should not be shared among neighbours or other children.</p> |
| <p>5. What other issues and concerns did you see with this family that are important for us to consider with regard to introduction of an MNP?</p> <p>Why?</p> | <p>There are no concern relating to hygiene or lack of food or feeding pattern that is of any importance.</p> <p>From what I saw today while observing this household, there are no concern to consider with regards to introduction of the MNP.</p>                                                                                                                                                                                                                            |

|                                                                                                                                                                                                                        |                                                                                                                                                                                                                                                                                              |
|------------------------------------------------------------------------------------------------------------------------------------------------------------------------------------------------------------------------|----------------------------------------------------------------------------------------------------------------------------------------------------------------------------------------------------------------------------------------------------------------------------------------------|
| <p>6. Based on your experience observing this child today, do you believe reactivity negatively impacted your ability to see the food-related behaviors of the child?</p> <p>Please explain your answer in detail.</p> | <p>The dad was showing much care to the child in my presence but in general, reactivity did not negatively impact my ability to see the food related behaviours of the child.</p> <p>My observation was not in any way affected by the reactivity because reactivity only occurred once.</p> |
|------------------------------------------------------------------------------------------------------------------------------------------------------------------------------------------------------------------------|----------------------------------------------------------------------------------------------------------------------------------------------------------------------------------------------------------------------------------------------------------------------------------------------|
