# Supplementary material for: Acceptance and compliance with micronutrient powder (MNP) among children aged 6–23 months in northern Nigeria
Source: PLOS journal article supplement (doi:10.1371/journal.pgph.0000961), 2022-10-17
Supplement: S8 (10.1371/journal.pgph.0000961.s008) [file journal.pgph.0000961.s008]

### 1.1.1 Instrument F –Direct Observation Form

#### <<Instrument F Direct Observation Form>>

**PI Name:** PragmaMathema,Stephen Kodish

**Study Title:** Formative research to develop an infant and young child feeding (IYCF) intervention with micronutrient powder (MNP) for children aged 6 – 23 months

**PI Version/Date:** Version1.0/January 24, 2015

Date: \_June 18, 2015\_\_\_\_\_Location: \_\_Bongo community, Song LGA\_\_\_\_\_

Data Collector: Aisha Dahiru\_\_\_\_\_Participant ID: \_\_\_\_\_

Main goals of this direct observation are to answer the following questions:

1. In this household, what would be the best way(s) to give nutritional supplements to young children? Why?
2. In this household, describe the food sharing that you observe throughout the meal. Are there any predictable patterns?
3. In this household, who is favored and how is this favoritism expressed during meal preparation and eating?

(TEAR OFF AT PERFORATED DOTTED LINE BELOW)

-----

PARTICIPANT ID: \_\_\_\_\_

Household Composition Table (Fill out as you do data collection)

| INITIALS | SEX<br>(M/F) | AGE<br>(estimated) | Relationship to<br>household | Description                                                     |
|----------|--------------|--------------------|------------------------------|-----------------------------------------------------------------|
| W        | F            | 26 YRS             | Mother                       | Fair complexion. Wearing a white shirt with a purple head gear. |
| H        | M            | 35 YRS             | Father                       | Dark complexion. Wearing blue trouser and a black shirt.        |
| G        | F            | 17 YEARS           | Mothers sister               | Dark skinned has facial mark and wearing green wrapper.         |
| B        | M            | 10 MONTHS          | Baby boy                     | Wearing a sweater with brown trousers.                          |
| M 1      | M            | 32 YRS             | Fathers brother              | Wearing yellow shirt and a blue jeans.                          |
| M 2      | M            | 30 YRS             | Fathers brother              | Wearing green shirt and a black jeans                           |

|   |   |       |           |                                                |
|---|---|-------|-----------|------------------------------------------------|
| S | M | 8 yrs | Older son | Wearing green checked shirt with green trouser |
|   |   |       |           |                                                |
|   |   |       |           |                                                |
|   |   |       |           |                                                |
|   |   |       |           |                                                |
|   |   |       |           |                                                |
|   |   |       |           |                                                |
|   |   |       |           |                                                |
|   |   |       |           |                                                |

PARTICIPANT ID: \_\_\_\_\_

| TIME | ACTOR INITIALS | RECIPIENT INITIALS | WHAT HAPPENED | FOOD                    | Reactivity |
|------|----------------|--------------------|---------------|-------------------------|------------|
| 8:00 | W              |                    | sweeping      |                         |            |
| 8:05 | W              |                    | sweeping      |                         |            |
| 8:10 | W              |                    | Sweeping      |                         |            |
| 8:15 | W              |                    | Sweeping      |                         |            |
| 8:20 | W              |                    | sweeping      |                         |            |
| 8:25 | W              |                    | sweeping      |                         |            |
| 8:30 | B              |                    | Crying        |                         |            |
| 8:35 | W              | B                  | Backing baby  |                         |            |
| 8:40 | W              |                    | Cooking       | Kunu gyada (ground nut) |            |

| TIME | ACTOR INITIALS | RECIPIENT INITIALS | WHAT HAPPENED                                                | FOOD                          | Reactivity |
|------|----------------|--------------------|--------------------------------------------------------------|-------------------------------|------------|
|      |                |                    |                                                              | gruel)                        |            |
| 8:45 | W              |                    | Cooking                                                      | Kunu gyada (ground nut gruel) |            |
| 8:50 | W              |                    | Cooking                                                      | Kunu gyada (ground nut gruel) |            |
| 8:55 | W              |                    | Washing of dishes                                            |                               |            |
| 9:00 | W              |                    | Washing of dishes                                            |                               |            |
| 9:05 | W              |                    | Washing of dishes                                            |                               |            |
| 9:10 | W              |                    | Washing of dishes                                            |                               |            |
| 9:15 | W              | B                  | Bathing the baby                                             |                               |            |
| 9:20 | W              | B                  | Bathing the baby                                             |                               |            |
| 9:25 | W              | B                  | Dressing the baby                                            |                               |            |
| 9:30 | H              | B                  | Playing with the baby                                        |                               |            |
| 9:35 | H              | B                  | Carrying the baby                                            |                               |            |
| 9:40 | W              |                    | Adding MNP to the child food                                 | Kunu gyada (ground nut gruel) |            |
| 9:41 | W              |                    | Mixing the MNP in the food                                   | Kunu gyada (ground nut gruel) |            |
| 9:42 | W              | B                  | Feeding the baby the portion of kunu that was mixed with MNP | Kunu gyada                    |            |

| TIME  | ACTOR INITIALS | RECIPIENT INITIALS | WHAT HAPPENED                                      | FOOD                          | Reactivity |
|-------|----------------|--------------------|----------------------------------------------------|-------------------------------|------------|
|       |                |                    |                                                    | (ground nut gruel)            |            |
| 9:43  | W              | B                  | Feeding the baby                                   | Kunu gyada (ground nut gruel) |            |
| 9:44  | W              | B                  | Feeding the baby the remaining portion without MNP | Kunu gyada (ground nut gruel) |            |
| 9:45  | W              | B                  | Feeding the baby                                   |                               |            |
| 9:46  | W              | B                  | Feeding the baby                                   |                               |            |
| 9:47  | W              | B                  | Washing the baby's hands and mouth                 |                               |            |
| 9:48  | W              | B                  | Backing the baby                                   |                               |            |
| 9:53  | W              | B                  | Backing the baby                                   |                               |            |
| 9:58  | W              | B                  | Backing the baby                                   |                               |            |
| 10:03 | W              | B                  | Lying the baby to sleep                            |                               |            |
| 10:08 | B              |                    | Sleeping                                           |                               |            |
| 10:13 | B              |                    | Sleeping                                           |                               |            |
| 10:18 | B              |                    | Sleeping                                           |                               |            |
| 10:23 | W              |                    | Stepped outside                                    |                               |            |
| 10:28 | B              |                    | Sleeping                                           |                               |            |
| 10:33 | B              |                    | Sleeping                                           |                               |            |
| 10:38 | G              |                    | Making up                                          |                               |            |

| TIME  | ACTOR INITIALS | RECIPIENT INITIALS | WHAT HAPPENED           | FOOD                          | Reactivity |
|-------|----------------|--------------------|-------------------------|-------------------------------|------------|
|       |                |                    |                         |                               |            |
| 10:43 | G              |                    | Still wearing make up   |                               |            |
| 10:48 | G              |                    | Pouring kunu from flask | Kunu gyada (ground nut gruel) |            |
| 10:53 | W              |                    | Checking on the baby    |                               |            |
| 10:58 | B              |                    | Sleeping                |                               |            |
| 11:03 | B              |                    | Sleeping                |                               |            |
| 11:08 | W              |                    | Pouring kunu into cup   | Kunu gyada (ground nut gruel) |            |
| 11:13 | W              |                    | Drinking kunu           | Kunu gyada (ground nut gruel) |            |
| 11:18 | W              |                    | Drinking kunu           | Kunu gyada (ground nut gruel) |            |
| 11:23 | G              |                    | Drinking kunu           | Kunu gyada (ground nut gruel) |            |
| 11:28 | G              |                    | Drinking kunu           | Kunu gyada (ground nut gruel) |            |
| 11:33 | B              |                    | Sleeping                |                               |            |

| TIME  | ACTOR INITIALS | RECIPIENT INITIALS | WHAT HAPPENED                        | FOOD | Reactivity |
|-------|----------------|--------------------|--------------------------------------|------|------------|
| 11:38 | W              |                    | Sitting                              |      |            |
| 11:43 | B              |                    | Sleeping                             |      |            |
| 11:48 | B              |                    | Sleeping                             |      |            |
| 11:53 | H              |                    | Came in holding firewood and cutlass |      |            |
| 11:58 | H              |                    | Washing hands and feet               |      |            |
| 12:03 | W              |                    | Lying down                           |      |            |
| 12:08 | W              |                    | Lying down                           |      |            |
| 12:13 | B              |                    | Sleeping                             |      |            |
| 12:18 | W              |                    | Lying down                           |      |            |
| 12:23 | W              |                    | Checking on the baby                 |      |            |
| 12:28 | B              |                    | Wakes up crying                      |      |            |
| 12:33 | W              |                    | Carrying baby                        |      |            |
| 12:38 | W              |                    | Changes the baby's cloth             |      |            |
| 12:43 | W              |                    | Holding the baby                     |      |            |
| 12:48 | H              |                    | Playing with the baby                |      |            |
| 12:53 | B              |                    | Crawling on the ground               |      |            |
| 12:58 | M1             |                    | Walk into the house                  |      |            |
| 12:58 | M2             |                    | Walk into the house                  |      |            |
| 12:58 | M2             | B                  | Playing with baby                    |      |            |
| 01:03 | B              |                    | Playing                              |      |            |
| 01:08 | B              |                    | Playing                              |      |            |

| TIME  | ACTOR INITIALS | RECIPIENT INITIALS | WHAT HAPPENED                                                       | FOOD   | Reactivity |
|-------|----------------|--------------------|---------------------------------------------------------------------|--------|------------|
|       |                |                    |                                                                     |        |            |
| 01:13 | H              |                    | Pouring water from jerry cans into clay pots and plastic containers |        |            |
| 01:18 | B              |                    | Watches father pour water                                           |        |            |
| 01:23 | B              |                    | Playing                                                             |        |            |
| 01:28 | W              |                    | Playing with baby                                                   |        |            |
| 01:33 | H              |                    | Discussing                                                          |        |            |
| 01:38 | W              |                    | Picks something from the kitchen and hands to husband               |        |            |
| 01:43 | B              |                    | crying                                                              |        |            |
| 01:43 | W              | B                  | Picks baby up and holding him                                       |        |            |
| 01:48 | W              | B                  | Rubbing oil on baby's head                                          |        |            |
| 01:53 | W              | B                  | Breastfeeding baby                                                  |        |            |
| 01:54 | W              | B                  | Breastfeeding baby                                                  |        |            |
| 01:55 | W              | B                  | Breastfeeding baby                                                  |        |            |
| 02:00 | W              | B                  | Playing with the baby                                               |        |            |
| 02:05 | B              |                    | Playing                                                             |        |            |
| 02:10 | B              |                    | Playing                                                             |        |            |
| 02:15 | B              |                    | Playing                                                             |        |            |
| 02:20 | B              |                    | Playing                                                             |        |            |
| 02:25 | B              |                    | Playing                                                             |        |            |
| 02:30 | B              |                    | Playing                                                             |        |            |
| 02:35 | W              |                    | Peeling orange                                                      | Orange |            |

| TIME  | ACTOR INITIALS | RECIPIENT INITIALS | WHAT HAPPENED                                    | FOOD            | Reactivity |
|-------|----------------|--------------------|--------------------------------------------------|-----------------|------------|
| 02:40 | W              |                    | Peeling orange                                   | Orange          |            |
| 02:45 | H              | M1, M2             | Carrying empty jerry cans outside.<br>Discussing |                 |            |
| 02:50 | B              |                    | Playing                                          |                 |            |
| 02:55 | B              |                    | Playing                                          |                 |            |
| 03:00 | B              |                    | Playing                                          |                 |            |
| 03:05 | W              | B                  | Giving baby orange                               | Orange          |            |
| 03:06 | H              | G                  | Gives sister orange                              | Orange          |            |
| 03:07 | G              | B                  | Feeds baby with orange                           | Orange          |            |
| 03:08 | B              |                    | Eating orange                                    | Orange          |            |
| 03:09 | B              |                    | Eating orange                                    | Orange          |            |
| 03:10 | B              |                    | EATING ORANGE                                    | Orange          |            |
| 03:15 | W              |                    | Setting fire                                     |                 |            |
| 03:20 | W              |                    | Setting fire                                     |                 |            |
| 03:25 | W              |                    | Setting fire                                     |                 |            |
| 03:30 | W              |                    | Pick basket from kitchen                         |                 |            |
| z     |                |                    |                                                  |                 |            |
| 03:35 | W              |                    | Peeling onions                                   | Onions          |            |
| 03:40 | W              |                    | Pick and rinse pot                               |                 |            |
| 03:41 | W              |                    | Pours oil into pot                               | Oil             |            |
| 03:42 | W              |                    | Put onion into the pot                           | Onions          |            |
| 03:43 | W              |                    | Adds dried fish into the pot                     | Fish            |            |
| 03:45 | W              |                    | Place the pot on the fire                        |                 |            |
| 03:50 | W              |                    | Stirs the content of the pot                     | Oil,<br>onion , |            |



| TIME  | ACTOR INITIALS | RECIPIENT INITIALS | WHAT HAPPENED                                             | FOOD         | Reactivity |
|-------|----------------|--------------------|-----------------------------------------------------------|--------------|------------|
|       |                |                    |                                                           | fish         |            |
| 03:52 | W              |                    | Washes pepper                                             | Pepper       |            |
| 03:53 | W              |                    | Puts pepper into a mortar                                 | pepper       |            |
| 03:53 | W              |                    | Pounding pepper                                           | Pepper       |            |
| 03:54 | W              |                    | Pounding pepper                                           | Pepper       |            |
| 03:55 | W              |                    | Pounding pepper                                           | Pepper       |            |
| 04:00 | W              |                    | Adds the pepper into the pot                              | pepper       |            |
| 04:01 | W              |                    | Stirring the food                                         |              |            |
| 04:05 | W              |                    | Adds water into the pot                                   | Water        |            |
| 04:06 | W              |                    | Covers the pot                                            |              |            |
| 04:07 | G              | B                  | Playing                                                   |              |            |
| 04:08 | G              | B                  | Playing                                                   |              |            |
| 04:09 | W              |                    | Playing with the baby                                     |              |            |
| 04:10 | W              |                    | Playing with the baby                                     |              |            |
| 04:15 | W              |                    | Folding clothes                                           |              |            |
| 04:20 | W              |                    | Taking empty containers into the kitchen                  |              |            |
| 04:25 | W              |                    | Check he food on the fire                                 |              |            |
| 04:30 | W              |                    | Adds other ingredients into the food                      | Salt, maggi  |            |
| 04:30 | H              |                    | Carrying jerry cans into the house                        |              |            |
| 04:35 | H              |                    | Pouring water from jerry cans into plastic containers     |              |            |
| 04:40 | W              |                    | Emptying water from the akamu that was kept since morning | Akamu        |            |
| 04:45 | W              |                    | Adding fresh clean water into the akamu                   | Akamu        |            |
| 04:50 | G              | B                  | Playing the baby                                          |              |            |
| 04:55 | B              |                    | Playing                                                   |              |            |
| 05:00 | G              | B                  | Steps outside with the baby                               |              |            |
| 05:01 | B              |                    | Playing under the tree with other children                |              |            |
| 05:01 | W              |                    | Checking the food on the fire                             |              |            |
| 05:02 | W              |                    | Adds baobab flour to the pot and stirs                    | Baobab flour |            |
| 05:03 | W              |                    | Stirs the soup                                            | Baobab soup  |            |
| 05:05 | W              |                    | Puts the pot down from fire                               |              |            |
| 05:06 | W              |                    | Places another pot on the fire with little water in it    | Water        |            |
| 05:06 | W              |                    | Puts the tuwo to warm it up                               | Tuwon        |            |

| TIME  | ACTOR INITIALS | RECIPIENT INITIALS | WHAT HAPPENED                    | FOOD                                      | Reactivity |
|-------|----------------|--------------------|----------------------------------|-------------------------------------------|------------|
|       |                |                    |                                  | masara (maize meal)                       |            |
| 05:10 | W              |                    | Bring down the pot with tuwo     |                                           |            |
| 05:11 | W              |                    | Serves the food                  | Tuwon masara (maize meal) and baobab soup |            |
| 05:12 | W              |                    | Washing the baby's hands         |                                           |            |
| 05:12 | G              |                    | Washing the hands                |                                           |            |
| 05:13 | W              |                    | Feeding the baby from her bowl   | Tuwon masara (maize meal) and baobab soup |            |
| 05:14 | W              |                    | Feeding the baby from same bowl  | Tuwon masara (maize meal) and baobab soup | R          |
| 05:15 | W              |                    | Eating meal together with sister | Tuwon masara (maize meal) and baobab soup |            |
| 05:15 | G              |                    | Eating meal together with sister | Tuwon masara (maize meal) and baobab soup |            |

| TIME  | ACTOR INITIALS | RECIPIENT INITIALS | WHAT HAPPENED                              | FOOD                                      | Reactivity |
|-------|----------------|--------------------|--------------------------------------------|-------------------------------------------|------------|
| 05:16 | W              | B                  | Feeding the baby from same bowl            | Tuwon masara (maize meal) and baobab soup | R          |
| 05:17 | B              |                    | Eating with his hands from the others bowl | Tuwon masara (maize meal) and baobab soup |            |
| 05:18 | H              | B                  | Feeding the baby from same bowl            | Tuwon masara and baobab soup              | R          |
| 05:19 | H              |                    | Eating meal together with sister           | Tuwon masara (maize meal) and baobab soup |            |
| 05:20 | H              |                    | Feeding the baby                           | Tuwon masara (maize meal) and baobab soup |            |
| 05:20 | H              |                    | Giving the baby water to drink             | Water                                     |            |
| 05:21 | H              |                    | Washing the baby's hands and mouth         |                                           |            |
| 05:21 | H              |                    | Washing hands                              |                                           |            |
| 05:22 | G              |                    | Washing hands                              |                                           |            |

| TIME  | ACTOR INITIALS | RECIPIENT INITIALS | WHAT HAPPENED                          | FOOD                                  | Reactivity |
|-------|----------------|--------------------|----------------------------------------|---------------------------------------|------------|
| 05:23 | G              |                    | Washing the dishes                     |                                       |            |
| 05:25 | G              |                    | Drying the dishes                      |                                       |            |
| 05:30 | H              |                    | Placing baby on potty                  |                                       |            |
| 05:35 | B              |                    | Sitting the baby on potty              |                                       |            |
| 05:40 | H              | B                  | Washing the baby                       |                                       |            |
| 05:41 | H              | B                  | Bathing the baby                       |                                       |            |
| 05:46 | H              | B                  | Dressing the baby                      |                                       |            |
| 05:51 | H              | B                  | Backing the baby                       |                                       |            |
| 05:56 | H              | B                  | Backing the baby                       |                                       |            |
| 06:01 | H              | B                  | Backing the baby                       |                                       |            |
| 06:01 | S              |                    | Walks into the house wearing a uniform |                                       |            |
| 06:06 | S              |                    | Changes cloths                         |                                       |            |
| 06:10 | S              |                    | Washing of hands                       |                                       |            |
| 06:15 | W              | S                  | Serves the older son food              | Tuwon masara (maize meal) baobab soup |            |
| 06:20 | S              |                    | Eating his meal                        | Tuwon masara (maize meal) baobab soup |            |
| 06:25 | S              |                    | Washing hands after meal               |                                       |            |
| 06:30 | S              |                    | Drinking water from clay pots          | Water                                 |            |

[illegible]

PARTICIPANT ID: \_\_\_\_\_

Primary Questions (Complete after you complete data collection):

From what you have seen observing THIS HOUSEHOLD, please answer the following questions in detail:

| Question                                                                                                                                               | Write your <u>detailed</u> response here                                                                                                                                                                                                |
|--------------------------------------------------------------------------------------------------------------------------------------------------------|-----------------------------------------------------------------------------------------------------------------------------------------------------------------------------------------------------------------------------------------|
| 1. In this household, what would be the best way(s) to give nutritional supplements such as an MNP to young children to ensure compliance?<br><br>Why? | The best way to ensure compliance is to educate the mother on the importance of the MNP                                                                                                                                                 |
| 2. In this household, who is favored during meal preparation or feeding?<br><br>How is this favoritism expressed?                                      | The food prepared in the evening was solid and the younger child did not have a separate bowl.                                                                                                                                          |
| 3. How could we promote the MNP supplement for this family that would attract their attention?<br><br>Who would they listen to?                        | MNP can be promoted to this family through the mother .<br>The father ca also serve as an influence because he is in charge of decisions in the household .<br>The religious leaders can also play a vital role in the promotion of MNP |

|                                                                                                                                                                |                                                                                                                                                                                                                                                             |
|----------------------------------------------------------------------------------------------------------------------------------------------------------------|-------------------------------------------------------------------------------------------------------------------------------------------------------------------------------------------------------------------------------------------------------------|
|                                                                                                                                                                |                                                                                                                                                                                                                                                             |
| <p>4. In this household, what would be the best ways to promote the MNP but limit how much it would be shared?</p> <p>Why?</p>                                 | <p>The best way is to ensure the mother understands that MNP is meant for children under 2 years and should be given to the child separately.</p> <p>Sharing can also be avoided from the sequence of eating i.e. the baby eat first before the mother.</p> |
| <p>5. What other issues and concerns did you see with this family that are important for us to consider with regard to introduction of an MNP?</p> <p>Why?</p> | <p>The mother was in charge of feeding the baby at some point and the mother's sister was also feeding the baby at other times.</p>                                                                                                                         |
| <p>6. Based on your experience observing this child today, do you believe reactivity negatively impacted your ability to see the food-related</p>              | <p>Reactivity did not have negative impact on child's behavior . the MNP was administered properly as instructed and the mother fed the child herself.</p>                                                                                                  |

|                                                                             |  |
|-----------------------------------------------------------------------------|--|
| <p>behaviors of the child?</p> <p>Please explain your answer in detail.</p> |  |
|-----------------------------------------------------------------------------|--|
