# Supplementary material for: Acceptance and compliance with micronutrient powder (MNP) among children aged 6–23 months in northern Nigeria
Source: PLOS journal article supplement (doi:10.1371/journal.pgph.0000961), 2022-10-17
Supplement: S8 (10.1371/journal.pgph.0000961.s008) [file journal.pgph.0000961.s008]

### 1.1.1 Instrument F –Direct Observation Form

#### <<Instrument F Direct Observation Form>>

**PI Name:** PragmaMathema,Stephen Kodish

**Study Title:** Formative research to develop an infant and young child feeding (IYCF) intervention with micronutrient powder (MNP) for children aged 6 – 23 months

**PI Version/Date:** Version1.0/January 24, 2015

Date: 27/06/15 Location: Kango

Data Collector: Samira Adamu

Main goals of this direct observation are to answer the following questions:

1. In this household, what would be the best way(s) to give nutritional supplements to young children? Why?
2. In this household, describe the food sharing that you observe throughout the meal. Are there any predictable patterns?
3. In this household, who is favored and how is this favoritism expressed during meal preparation and eating?

Household Composition Table (Fill out as you do data collection)

| INITIALS | SEX (M/F) | AGE (estimated) | Relationship to household                          | Description (not necessary)                  |
|----------|-----------|-----------------|----------------------------------------------------|----------------------------------------------|
| BB1      | F         | 8months         | Youngest child                                     | Baby girl wearing green pants                |
| BB2      | F         | 8months         | Youngest child (twin sister to the youngest child) | Baby girl wearing orange pant                |
| M1       | F         | 24years         | 1 <sup>st</sup> wife                               | Wearing green and red attire                 |
| M2       | F         | 20years         | Mother of child and second wife                    | Wearing orange top with blue wrapper         |
| BG       | F         | 3years          | 3 <sup>rd</sup> child (step sister)                | Wearing blue top and pink skirt              |
| BG2      | F         | 7years          | Cousin                                             | Plump and wearing light green attire         |
| YL       | F         | 14years         | Niece to the 1 <sup>st</sup> wife                  | Wearing yellow veil and coffee brown wrapper |
| F        | M         | 32years         | Husband                                            | Wearing dark green kaftan                    |

|    |   |        |              |                              |
|----|---|--------|--------------|------------------------------|
| B1 | M | 5years | Step brother | Wearing peach coloured shirt |
|    |   |        |              |                              |
|    |   |        |              |                              |
|    |   |        |              |                              |
|    |   |        |              |                              |
|    |   |        |              |                              |
|    |   |        |              |                              |

PARTICIPANT ID: \_\_\_\_\_

| TIME | ACTOR INITIALS | RECIPIENT INITIALS | WHAT HAPPENED                                                                 | FOOD        | Reactivity |
|------|----------------|--------------------|-------------------------------------------------------------------------------|-------------|------------|
| 8:10 | M1             |                    | Processing sorghum to remove shaft using a stainless bowl without water       |             |            |
|      | M              | BB2                | Carrying the child on her laps sitting on the stool                           |             |            |
|      | BB1            |                    | Playing with a small stainless plate on the floor                             |             |            |
| 8:15 | M1             |                    | Still Processing sorghum to remove shaft using a stainless bowl without water |             |            |
|      | M              | BB2                | Sitting on a stool and breastfeeding the child                                | Breast milk |            |
|      | BB1            |                    | Playing near a pot of maize soaked with hot water                             |             |            |
|      | M1             | BB1                | Carrying the pot away from the baby                                           |             |            |
| 8:20 | BB2            |                    | Crawling around the house on the floor                                        |             |            |
|      | BB1            |                    | Playing with sieve and small stainless plate on the floor                     |             |            |
|      | M1             |                    | Still Processing sorghum to remove shaft using a stainless bowl without water |             |            |
|      | M              |                    | Pouring hot water into a bathing basin                                        |             |            |

| TIME | ACTOR INITIALS | RECIPIENT INITIALS | WHAT HAPPENED                                                                   | FOOD   | Reactivity |
|------|----------------|--------------------|---------------------------------------------------------------------------------|--------|------------|
| 8:25 | M1             |                    | Still Processing sorghum to remove shaft using a stainless bowl without water   |        |            |
|      | BB2            |                    | Crawling around the house                                                       |        |            |
|      | M              |                    | Adding cold water to the hot water in the bathing basin                         |        |            |
|      | BB1            |                    | Playing with sieve and shaft of sorghum processed by the step mother            |        |            |
| 8:30 | M              | BB1                | Bathing the child                                                               |        |            |
|      | BB2            |                    | Playing with the water in the bathing basin                                     |        |            |
|      | M1             |                    | Adding cold water to the processed sorghum                                      |        |            |
|      | BB1            |                    | Sitting in th bathing basin with water after bath                               |        |            |
|      | BB2            |                    | Still playing with the water                                                    |        |            |
|      | M              |                    | Bringing a basket of baby's cosmetics to make up the child                      |        |            |
|      | M1             |                    | Washing and decanting the water to remove excess shaft along with the water     |        |            |
| 8:35 | BB1            |                    | Still in the bathing water                                                      |        |            |
|      | BB2            |                    | Still playing with the bathing water while sitting on the floor                 |        |            |
|      | M              |                    | Removing clothes from the baby's basket of cloth                                |        |            |
|      | M1             |                    | Sieving and draining the excess water and shaft from the sorghum                |        |            |
|      | M              |                    | Removing clothes from baby's basket of clothes                                  |        |            |
| 8:40 | M              | BB1&BB2            | Carrying the child on her laps and putting the other child in the bathing water |        |            |
|      | M1             |                    | Sweeping her room while her child came in crying                                |        |            |
| 8:45 | M              |                    | Sitting on a stool, breast feeding                                              | Breast |            |

| TIME | ACTOR INITIALS | RECIPIENT INITIALS | WHAT HAPPENED                                                                       | FOOD        | Reactivity |
|------|----------------|--------------------|-------------------------------------------------------------------------------------|-------------|------------|
|      |                |                    | then child and rubbing Vaseline on her body                                         | milk        |            |
|      | BB2            |                    | Sitting in the water bath basin and watching the mother                             |             |            |
|      | M1             |                    | Packing dirty clothes from the ground                                               |             |            |
| 8:50 | M              | BB1                | Breastfeeding the child, sitting on a stool and rubbing powder on her face and neck | Breast milk |            |
|      | BB2            |                    | Still sitting in the water bath basin and watching them                             |             |            |
|      | BG             |                    | Clapping hands and smiling at the child                                             |             |            |
| 8:55 | M              | BB1                | Wearing clothes for the child and still breast feeding the child                    | Breast milk |            |
|      | BB2            |                    | Still sitting in the water bath basin and watching them                             |             |            |
|      | M1             |                    | Packing dirty plates and bowls into a big basin                                     |             |            |
| 9:00 | M              | BB1&BB2            | Kept the child on the floor and started bathing the other child                     |             |            |
|      | M1             |                    | Washing the dirty plates packed in the basin                                        |             |            |
|      | BG2            |                    | Playing with the children                                                           |             |            |
| 9:05 | M              | BB2                | Bathing the child                                                                   |             |            |
|      | M1             |                    | Washing then dirty plates in a basin and putting them in a basket to drain          |             |            |
|      | BB1            |                    | Sitting on a plastic bowl and stooling                                              |             |            |
|      | BG2            |                    | Singing and playing with then children                                              |             |            |
| 9:10 | M              | BB2                | Carrying then child on her laps and rubbing Vaseline                                |             |            |
|      | BB1            |                    | Sitting on a plastic bowl and stooling                                              |             |            |
|      | M1             |                    | Still Washing then dirty plates in a basin and putting them in a basket to drain    |             |            |

| TIME | ACTOR INITIALS | RECIPIENT INITIALS | WHAT HAPPENED                                                                                           | FOOD        | Reactivity |
|------|----------------|--------------------|---------------------------------------------------------------------------------------------------------|-------------|------------|
|      | BG2            |                    | Singing and cutting sticks on the floor for the children as they are all smiling                        |             |            |
| 9:15 | M              | BB1                | Holding water in a kettle and carrying the child to a corner of the house to clean her up               |             |            |
|      | BB2            |                    | Still sitting on a plastic bowl and stooling                                                            |             |            |
|      | M1             |                    | Washing, rinsing and draining plates in a basket                                                        |             |            |
| 9:20 | BG             |                    | Singing and playing with the twins                                                                      |             |            |
|      | M1             |                    | Rinsing and draining stainless bowls                                                                    |             |            |
|      | M              | BB1                | Breastfeeding then child while sitting on a stool                                                       | Breast milk |            |
|      | BB2            |                    | Sitting on the plastic bowl and stooling and also playing with a plastic hand fan                       |             |            |
| 9:25 | M1             | M                  | Sitting the child on the floor and giving her a plastic hand fan                                        |             |            |
|      | BB2            |                    | Still sitting on the plastic bowl and playing                                                           |             |            |
|      | M1             | M                  | Giving her plates and bowls                                                                             |             |            |
| 9:30 | M              | BB2                | Holding a kettle of water and carrying the child and the plastic stooling bowl to a corner of the house |             |            |
|      | M1             |                    | Carrying a basket of washed plates and bowls to her room                                                |             |            |
|      | BB1            |                    | Crawling around in front of the mother's room                                                           |             |            |
|      | BG             | BB1                | Playing with the child and smiling                                                                      |             |            |
| 9:35 | M              | BB2                | Wearing clothes for the child                                                                           |             |            |
|      | BB1            |                    | Crawling around in front of the mother's room                                                           |             |            |
|      | M1             |                    | Pouring waste water on the floor                                                                        |             |            |

| TIME  | ACTOR INITIALS | RECIPIENT INITIALS | WHAT HAPPENED                                                                         | FOOD | Reactivity                                   |
|-------|----------------|--------------------|---------------------------------------------------------------------------------------|------|----------------------------------------------|
|       | BG2            | BB2                | Carrying the child and singing while going out of the house                           |      |                                              |
|       | BG1            |                    | Entering the house crying and shouting the mother's name                              |      |                                              |
|       | BB1            |                    | Crawling and playing with a wrap of stick                                             |      |                                              |
| 9:40  | BB1            |                    | Crawling and playing with the sister                                                  |      |                                              |
|       | BG1            |                    | Playing with the child                                                                |      |                                              |
|       | M              |                    | washing her child's clothes in front of her room                                      |      |                                              |
|       | M1             |                    | Lying on a mat in front of her room                                                   |      |                                              |
| 9:45  | BB1&BG         |                    | Crawling and playing together on the floor                                            |      |                                              |
|       | M              |                    | Lying on a mat and gisting with her rival                                             |      |                                              |
|       | M1             |                    | Standing and drying her clothes while gisting with her rival                          |      |                                              |
| 9:50  | BB1            |                    | Playing alone with rubber hand fan and crawling                                       |      |                                              |
|       | M              |                    | Lying on a mat in front of her room                                                   |      |                                              |
|       | M1             |                    | Leaving the house                                                                     |      |                                              |
| 9:55  | BB1            |                    | Playing with the direct observation form                                              |      | Playing with direct observation form and pen |
|       | M              | BB1                | Carrying the child away from me                                                       |      |                                              |
| 10:00 | BG             |                    | Entering the house and playing with the child and smiling                             |      |                                              |
|       | BB2            |                    | Happily smiling with the cousin                                                       |      |                                              |
|       | M              |                    | Giving a young girl a stainless basin with half full of sorghum to take to her mother |      |                                              |
| 10:05 | BG             | BB1                | Standing the child on her lap and singing for her                                     |      |                                              |

| TIME  | ACTOR INITIALS | RECIPIENT INITIALS | WHAT HAPPENED                                                                                              | FOOD        | Reactivity         |
|-------|----------------|--------------------|------------------------------------------------------------------------------------------------------------|-------------|--------------------|
|       | M              |                    | Lying on a mat in front of her room                                                                        |             |                    |
| 10:10 | M1             |                    | Entering the house and talking with her child                                                              |             |                    |
|       | M              |                    | Lying on a mat in front of her room                                                                        |             |                    |
|       | BG             | BB1                | Playing with the child and smiling                                                                         |             |                    |
| 10:15 | M1             | BG                 | Instructing her to collect waina pan from the neighborhood                                                 |             |                    |
|       | M              |                    | Lying on a mat in front of her room while the child is playing with the scarf                              |             |                    |
| 10:20 | M              |                    | Sitting on a stool in front of the house and gisting with her rival who is lying down on a mat             |             |                    |
|       | M1             | BB1                | Breastfeeding the child while lying on the mat                                                             | Breast milk |                    |
| 10:25 | M1             | BB1                | Still breast feeding the child still lying on the mat                                                      | Breast milk |                    |
|       | YL             | BB2                | Entering and carrying the child, giving the child to her mother and I was told she niece to the first wife |             |                    |
|       | M              |                    | Still sitting on a stool in front of her room                                                              |             |                    |
| 10:30 | M1             | BB1&BB2            | Breastfeeding the children together at once while lying down                                               | Breast milk |                    |
|       | BB2&BB1        |                    | Suckling the mother's breast and playing with each other's hand                                            | Breast milk |                    |
| 10:35 | BB1            |                    | Crawled towards me and dragged my folder                                                                   |             | Dragging my folder |
|       | YL             |                    | Carrying the child from me                                                                                 |             |                    |
|       | M              | BB2                | Breastfeeding the baby and lying on the mat with the baby                                                  |             |                    |
|       | M1             |                    | Telling the lady to bring the child to her place                                                           |             |                    |
| 10:40 | M              | BB2                | Lying on the mat and breastfeeding the twin child while the child is sleeping and sucking                  | Breast milk |                    |

| TIME  | ACTOR INITIALS | RECIPIENT INITIALS | WHAT HAPPENED                                           | FOOD | Reactivity |
|-------|----------------|--------------------|---------------------------------------------------------|------|------------|
|       | M1             | BB1                | Carrying the child on her lap and singing               |      |            |
| 10:45 | M1             | BB1                | Still playing with the child and she is smiling happily |      |            |
|       | M&BB2          |                    | Both are sleeping on a mat in front of the room         |      |            |
| 10:50 | M1             |                    | Sleeping on the mat                                     |      |            |

|       |       |     |                                                                                        |  |  |
|-------|-------|-----|----------------------------------------------------------------------------------------|--|--|
|       | BB2   |     | Sleeping on the mat with their mother                                                  |  |  |
|       | M1    | Bb1 | Carrying the child to a neighborhood                                                   |  |  |
| 10:55 | M1    | BB1 | Holding the child and gisting with the neighbors while collecting a tray from them     |  |  |
| 11:00 | M1    | B1  | backing the baby and carrying a kettle of water                                        |  |  |
|       | M     |     | Sleeping on a mat in front of her room                                                 |  |  |
|       | BB2   |     | Sleeping beside the mother                                                             |  |  |
| 11:05 | M1    | BB1 | Backing the baby and rinsing a pant while the baby is sleeping                         |  |  |
|       | M     |     | Sleeping on a mat in front of her room                                                 |  |  |
|       | BB2   |     | Sleeping alongside mother                                                              |  |  |
| 11:10 | M1    | BB2 | Backing the child and sitting on the stool while the baby was sleeping                 |  |  |
|       | M&BB2 |     | Both are still sleeping on the mat                                                     |  |  |
| 11:15 | M&BB2 |     | Both are still sleeping on the mat                                                     |  |  |
|       | M1    | BB1 | Backing the baby and sitting on a stool                                                |  |  |
| 11:20 | M1    |     | Backing the baby and carrying the child to the neighborhood while the baby is sleeping |  |  |
|       | M&BB2 |     | Both are still sleeping on the ma                                                      |  |  |
| 11:25 | M1    |     | Backing the baby in the                                                                |  |  |



|       |        |     |                                                                                                                                               |  |  |
|-------|--------|-----|-----------------------------------------------------------------------------------------------------------------------------------------------|--|--|
|       |        |     | neighborhood and sending a child to buy her kanwa (potash)                                                                                    |  |  |
| 11:30 | M1     |     | Backing the baby who is still sleeping while standing in the neighborhood                                                                     |  |  |
| 11:35 | M&BB2  |     | Both are still sleeping on the mat in front of her room                                                                                       |  |  |
|       | M1     | BB1 | Backing the baby and sitting on the stool in front of her room                                                                                |  |  |
| 11:40 | M1     | BB1 | Backing the baby and sitting on the stool in front of her room                                                                                |  |  |
|       | M1&BB2 |     | Both are still sleeping on the mat in front of her room                                                                                       |  |  |
| 11:45 | M1     | BB1 | Backing the child and standing at the entrance of the house and gisting with an aged woman<br>The aged woman is the wife of the father-in-law |  |  |
|       | M1     |     | Sitting on the mat in front of her room                                                                                                       |  |  |
|       | BB2    |     | Still sleeping on the mat beside the mother                                                                                                   |  |  |
| 11:50 | M      | BB2 | Carrying the child on her shoulders and folding the mat                                                                                       |  |  |
|       | M1     | BB1 | Sweeping the compound of the house and backing the baby who is still sleeping                                                                 |  |  |
|       | BG     |     | Playing in front of the mother's room with her scarf                                                                                          |  |  |
| 11:55 | M1     | BB1 | Backing the child and still sweeping the compound                                                                                             |  |  |
| 12:00 | M1     | BB1 | Backing the child and sitting on a stool                                                                                                      |  |  |
| 12:05 | M1     |     | Lying a child on a mat in front of the rival's house                                                                                          |  |  |
|       | M      |     | Sleeping beside the children and sleeping                                                                                                     |  |  |
| 12:10 | BB1    |     | Sleeping on the mat                                                                                                                           |  |  |
| 12:15 | BB1&M  |     | Still sitting on the mat while the mother sits beside her                                                                                     |  |  |
| 12:20 | BB1&M  |     | Still sitting on the mat while the mother sits beside her                                                                                     |  |  |

|       |       |     |                                                                                                                         |             |  |
|-------|-------|-----|-------------------------------------------------------------------------------------------------------------------------|-------------|--|
| 12:25 | BB&M  |     | Sleeping on the mat while the mother sleeps beside her                                                                  |             |  |
| 12:30 | M1    |     | Lying on a mat in front of her room                                                                                     |             |  |
| 12:35 | BB&M  |     | Sleeping on the mat while the mother sleeps beside her                                                                  |             |  |
|       | M1    |     | Lying on th mat in front of her room                                                                                    |             |  |
| 12:40 | F     |     | Carrying a hoe from the farm, greeted me and entered her room                                                           |             |  |
|       | BB    |     | The child is still sleeping on the mat                                                                                  |             |  |
|       | M     |     | Putting water into a basin for the husband to bath                                                                      |             |  |
| 12:45 | M     | BB1 | Carrying the child on her laps, sitting on the mat while the child is just looking at the mother and touching her mouth |             |  |
| 12:50 | M     | BB1 | Breastfeeding the child while sitting on the mat                                                                        | Breast milk |  |
|       | BG    |     | Pouring a bucket of water into water storage drum that has a cover                                                      |             |  |
| 12:55 | M1    |     | Setting of fire, arranging three stones                                                                                 |             |  |
|       | M     | BB1 | Sitting in the room and breast feeding the child                                                                        | Breast milk |  |
| 1:00  | BB1   |     | Sitting on the mat and playing with hand fan                                                                            |             |  |
|       | M1    |     | Setting the fire                                                                                                        |             |  |
| 1:05  | M     |     | Mixing maize flour paste which was made in the early hours of today adding salt and yeast to the paste                  |             |  |
| 1:10  | BG&B1 | BB1 | Playing wither siblings with broom sticks                                                                               |             |  |
|       | M1    |     | Adding half spoon of groundnut oil to each of the pan                                                                   |             |  |
|       | M     |     | Still mixing maize flour paste with salt and yeast                                                                      |             |  |
|       | M1    |     | Putting full of the properly mixed flour paste to each of the frying pan                                                |             |  |

|      |     |     |                                                                                                                                                        |             |  |
|------|-----|-----|--------------------------------------------------------------------------------------------------------------------------------------------------------|-------------|--|
|      |     |     | and allowing it to fry on one side while turning the other                                                                                             |             |  |
| 1:15 | M   | BB1 | Breastfeeding the child while standing                                                                                                                 | Breast milk |  |
|      | M1  |     | turning the waina to the other side for it to fry well                                                                                                 |             |  |
|      | M1  |     | Removing the ones that have fried and putting It in a bowl with cover, and adding groundnut oil to the empty well and immediately adding of paste      |             |  |
| 1:20 | M   | BB1 | Sitting on a stool and breast feeding the child                                                                                                        | Breast milk |  |
|      | M1  |     | Turning the waina upside down to fry very well and removing the properly fried ones and adding oil to the empty well and immediately adding more paste |             |  |
| 1:25 | M   |     | Sweeping her room                                                                                                                                      |             |  |
|      | M1  |     | Turning the waina upside down to fry very well and removing the properly fried ones and adding oil to the empty well and immediately adding more paste |             |  |
| 1:30 | M   | BB1 | Breastfeeding the child while sitting on the stool                                                                                                     | Breast milk |  |
|      | M1  |     | Still taking the same process of frying waina                                                                                                          |             |  |
|      | BG  | BB1 | Playing with the child while she suckles                                                                                                               | Breast milk |  |
| 1:35 | BG  | BB1 | Still playing with child                                                                                                                               |             |  |
|      | BB1 |     | Playing with her sister and stooling on the mat, the mother carried her and keeps her on a stooling rubber bowl but she is crying                      |             |  |
| 1:40 | BG  |     | Eating waina with grounded pepper                                                                                                                      |             |  |
|      | M   | BB1 | Washing the child with water In one corner of the house still taking the same process of frying waina                                                  |             |  |
|      | M1  |     | Still taking the same process of                                                                                                                       |             |  |

|      |         |         |                                                                                                   |              |  |
|------|---------|---------|---------------------------------------------------------------------------------------------------|--------------|--|
|      |         |         | frying waina                                                                                      |              |  |
|      | YL      |         | Sweeping aunt's room which was messed up by the children                                          |              |  |
| 1:45 | BG      | BB1     | Feeding the child with waina and pepper as she also eats                                          | Wainan maize |  |
|      | M1      |         | Still taking the same process of frying waina                                                     |              |  |
|      | M       |         | Carrying a bucket of water to the toilet                                                          |              |  |
| 1:50 | BG      | BB1     | Still feeding the child waina and pepper while the child sits very close to the step mother's leg |              |  |
|      | M1      |         | Still taking the same process of frying waina                                                     |              |  |
|      | BG2     | BB2     | Carrying the twin child and bringing her to the house from the neighborhood                       |              |  |
|      | BB1     |         | Crying as she is been carried away from the step mom by the cousin sister                         |              |  |
|      | BB2     |         | Sitting on a stooling rubber pan and crying                                                       |              |  |
| 1:55 | YL      |         | Taking the same process of frying waina                                                           |              |  |
|      | BG      | BB      | Jumping and clapping hands for the child in the room                                              |              |  |
| 2:00 | M       | BB2     | Carrying the child and giving her water                                                           |              |  |
|      | YL      |         | Still taking the same process of frying waina                                                     |              |  |
| 2:05 | B       | BB1     | Carrying the child to her twin sister                                                             |              |  |
|      | BB2&BB1 |         | Crying and crawling to their mother                                                               |              |  |
| 2:10 | BB1&BB2 |         | Still crying and crawling around the mother while she is praying                                  |              |  |
| 2:15 | BB1&BB2 |         | Still crying while the mother is praying in her room                                              |              |  |
| 2:20 | M       | BB1&BB2 | Feeding both children on separate breast at the same time                                         | Breast milk  |  |
| 2:25 | M       | BB1     | Sitting on the mat and feeding the child                                                          | Breast milk  |  |
|      | M1      |         | Still taking the same process of                                                                  |              |  |

|      |         |     |                                                                                                                          |             |  |
|------|---------|-----|--------------------------------------------------------------------------------------------------------------------------|-------------|--|
|      |         |     | frying waina                                                                                                             |             |  |
|      | BB2     |     | Playing with the rubber hand fan                                                                                         |             |  |
| 2:30 | M       |     | Dissolving half tablet of flagyl and dissolving it in the water, carried the child on her laps and gave her the medicine |             |  |
|      | BB1     |     | Crawling towards me and trying to touch my pen                                                                           |             |  |
|      | M1      |     | Still taking the process of frying waina                                                                                 |             |  |
| 2:35 | BB1     |     | Crying on the mat, mother carried her and was feeding her                                                                | Breast milk |  |
|      | M1      |     | Still taking the same process of frying waina                                                                            |             |  |
| 2:40 | BB1&BB2 |     | Crawling around in the house                                                                                             |             |  |
|      |         |     | Sitting in front of the step mother's corridor                                                                           |             |  |
| 2:45 | BB1     |     | Sitting on the floor and watching her mother fry waina                                                                   |             |  |
|      | M       |     | Still taking the process of frying waina                                                                                 |             |  |
| 2:50 | BB1     |     | Playing with an empty bucket                                                                                             |             |  |
|      | M       |     | Still taking the process of frying waina                                                                                 |             |  |
| 2:55 | M1      | BB1 | Carrying the child on her laps and singing for her                                                                       |             |  |
|      | BG      | BB2 | Holding hands and playing with the child                                                                                 |             |  |
|      | YL      |     | Counting the waina and taking it for hawking                                                                             |             |  |
|      | M       |     | Putting the remaining waina in a bowl and covering it for family consumption                                             |             |  |
| 3:00 | BG      | BB1 | Eating waina with the child                                                                                              | Waina maize |  |
| 3:05 | BB1     |     | Eating waina                                                                                                             |             |  |
| 3:10 | M       | BB1 | Feeding her with waina                                                                                                   | Waina maize |  |
|      | M       | BB1 | Sitting on the mat and crying, the                                                                                       | Breast      |  |

|      |         |         |                                                                                                                     |             |                      |
|------|---------|---------|---------------------------------------------------------------------------------------------------------------------|-------------|----------------------|
| 3:15 |         |         | mother carries her and is breastfeeding her                                                                         | milk        |                      |
| 3:20 | M       | BB1&BB2 | Feeding the child with waina                                                                                        | Waina maize |                      |
|      | M1      |         | Is packing the used bowls and spoons after frying waina                                                             |             |                      |
|      | BB2     |         | Twin child is stooling on the floor while the child is eating waina                                                 |             |                      |
| 3:25 | M       |         | Washing the used dirty plates                                                                                       |             |                      |
|      | BB1&BB2 |         | Playing together with one rubber hand fan                                                                           |             |                      |
| 3:30 | BB1&BB2 |         | All playing on the mat together                                                                                     |             |                      |
| 3:35 | BB1&BB2 |         | Crawling around the house and playing with buckets, slippers and my hand bag, but the step mother carried them away |             | Touching my hand bag |
| 3:40 | M       | BB1&BB2 | Carrying them and sitting on the mat                                                                                |             |                      |
| 3:45 | M       | BB1&BB2 | Giving the twin child water                                                                                         | Water       |                      |
| 3:50 | BB1     |         | Crawling and crying, the mother carrying her and feeding her while standing                                         | Breast milk |                      |
|      | M1      |         | Trading with a woman, giving her sorghum while she offered her baby clothing in return                              |             |                      |
| 3:55 | M       |         | Carrying the twin child and giving her water while the step mother carries the child                                | water       |                      |
| 4:00 | M1      | BB1&BB2 | Bathing the children with boiled herbal plant water; I was told it's because the twin child has diarrhea            |             |                      |
| 4:05 | M1      | BB1     | Feeding the child while the twin child having diarrhea remains in the water bath basin                              |             |                      |
| 4:10 | BB1     |         | The child is sleeping on the mat                                                                                    |             |                      |
| 4:15 | BB1&BB2 |         | Both sleeping on the mat together                                                                                   |             |                      |
|      |         |         | The mother holding a kettle with water and performing ablution                                                      |             |                      |

|      |         |     |                                                                                      |             |  |
|------|---------|-----|--------------------------------------------------------------------------------------|-------------|--|
|      |         |     |                                                                                      |             |  |
| 4:20 | BB1&BB2 |     | Both children sleeping on the mat whereas both mothers/wives are at the neighborhood |             |  |
| 4:25 | BB1&BB2 |     | Children sleeping on the mat while wives are at the neighborhood                     |             |  |
| 4:30 | BB1&BB2 |     | Children are still sleeping                                                          |             |  |
| 4:35 | BB1&BB2 |     | Children are still sleeping                                                          |             |  |
| 4:40 | BB1&BB2 |     | Children are still sleeping                                                          |             |  |
| 4:45 | BB1&BB2 |     | Children are still sleeping                                                          |             |  |
| 4:50 | BB1&BB2 |     | Children are still sleeping                                                          |             |  |
| 4:55 | BB1     |     | Still sleeping with twin sister on the mat                                           |             |  |
|      | M1      |     | Sweeping and arranging the kitchen                                                   |             |  |
|      | M       |     | Still at the neighborhood                                                            |             |  |
| 5:00 | BB1     |     | Still sleeping with twin sister on the mat                                           |             |  |
| 5:05 | BB1     |     | Still sleeping with twin sister on the mat                                           |             |  |
| 5:10 | BB1     |     | Still sleeping with twin sister on the mat                                           |             |  |
| 5:15 | BB1     |     | The child is sitting on the mat alongside the twin sister sitting on the mat also    |             |  |
| 5:20 | M1      |     | Setting the fire                                                                     |             |  |
|      | M       | BB2 | Breastfeeding the twin child                                                         | Breast milk |  |
|      | BB1     |     | Sitting on the mat and playing with sand                                             |             |  |
| 5:25 | M1      |     | Putting water in a pot and placing it on fire                                        |             |  |
|      | BB1     |     | Sitting on the mat and playing with sand                                             |             |  |
|      | M1      | BB1 | Giving the child water and backing                                                   |             |  |

|      |    |         |                                                                                                                                                                                   |             |  |
|------|----|---------|-----------------------------------------------------------------------------------------------------------------------------------------------------------------------------------|-------------|--|
| 5:30 |    |         | her                                                                                                                                                                               |             |  |
|      | M  | BB2     | Backing the twin child and arranging the house                                                                                                                                    |             |  |
| 5:35 | M1 |         | Backing the twin and washing soaked maize in hot water which has been soaked since morning<br>Draining it in a calabash so that it can dry and be used for waina for the next day |             |  |
| 5:40 | M1 |         | Backing the child and adding firewood to the fire                                                                                                                                 |             |  |
| 5:45 | M1 |         | Making a paste from grounded sorghum flour by adding water and mixing it properly to obtain a semi solid mixture                                                                  |             |  |
|      | M  | BB1     | Carrying the twin child on her lap and breastfeeding her                                                                                                                          | Breast milk |  |
| 5:50 | M  | BB1&BB2 | Breastfeeding the child and twin sister on th mat                                                                                                                                 | Breast milk |  |
| 5:55 | M  | BB1     | Breastfeeding the child on the mat while the twin sister lays on the mat                                                                                                          | Breast milk |  |
| 6:00 | M  | BB1     | Still breast feeding the child while the twin sister eats dankale and the child refuses to eat                                                                                    | Moringa     |  |
|      |    |         |                                                                                                                                                                                   |             |  |
|      |    |         |                                                                                                                                                                                   |             |  |



# NOTES

I asked if she has administered the MNP throughout the day because I have not seen her doing it

## Response (1 st wife)

*"Yes she has taken it and we prefer giving her in the morning when the kunu is very fresh and when it reaches afternoon, it gets fermented".*

## Response (2<sup>nd</sup> wife)

*"I usually give the kunu dawa in the morning, so I use the opportunity to administer the MNP into a small portion of the kunu, after mixing, I give the specified child. When she finishes, I continue giving them the kunu together and I also did today".*

I also asked her how she administers the MNP

*"I prepare kunu in the morning and when it is too thick that the children won't like it, I add a little water but that does not make it watery because the twins don't like watery kunu. I fetch small portion of kunu, open the MNP and pour all to the fetched portion mix properly and give her to finish it all. But she has been sick for like 3-5days ever since then. I have to force to finish it and in the process some pour on her body. They don't like kunu these days because the twin is sick and not well these days".*

Primary Questions (Complete after you complete data collection):

From what you have seen observing THIS HOUSEHOLD; please answer the following questions in detail:

| Question                                                                                                                                                      | Write your <u>detailed</u> response here                                                                                                                                                                                                                                                                                                                                                                                                                          |
|---------------------------------------------------------------------------------------------------------------------------------------------------------------|-------------------------------------------------------------------------------------------------------------------------------------------------------------------------------------------------------------------------------------------------------------------------------------------------------------------------------------------------------------------------------------------------------------------------------------------------------------------|
| <p>1. In this household, what would be the best way(s) to give nutritional supplements such as an MNP to young children to ensure compliance?</p> <p>Why?</p> | <p>Through the 2 wives most especially the first wife</p> <p>Because both of them collectively look after the children and it seems the first wife is more attentive to the children and takes most of the responsibilities in the house. They also share mutual respect between them because the 2<sup>nd</sup> wife (mother of child) really respects and take the word of the 1<sup>st</sup> wife serious</p>                                                  |
| <p>2. In this household, who is favored during meal preparation or feeding?</p> <p>How is this favoritism expressed?</p>                                      | <p>There was no favoritism to my own understanding based on my observation because the children are just practicing to eat. And I was not opportune to see the feeding pattern since it is fasting period</p>                                                                                                                                                                                                                                                     |
| <p>3. How could we promote the MNP supplement for this family that would attract their attention?</p> <p>Who would they listen to?</p>                        | <p>Through the health care providers because it seems they really care about the health of their children based on my observation , the twin child having diarrhea was not just left at home but taken to the hospital and given drugs alongside 2injections. And I was given a warm welcome because I said I was from FMOH</p> <p>The wives will listen to the husband and the husband is exposed to some level of civilization, he has a good understanding</p> |

|                                                                                                                                                                                                                        |                                                                                                                                                                                                                                                                                                                                                                                                                                                                                                                                                                   |
|------------------------------------------------------------------------------------------------------------------------------------------------------------------------------------------------------------------------|-------------------------------------------------------------------------------------------------------------------------------------------------------------------------------------------------------------------------------------------------------------------------------------------------------------------------------------------------------------------------------------------------------------------------------------------------------------------------------------------------------------------------------------------------------------------|
|                                                                                                                                                                                                                        |                                                                                                                                                                                                                                                                                                                                                                                                                                                                                                                                                                   |
| <p>4. In this household, what would be the best ways to promote the MNP but limit how much it would be shared?</p> <p>Why?</p>                                                                                         | <p>I think since the other caregiver doesn't have a child of 6-23 months, maybe she should be given MNP for one of the twins while the mother holds for the other.</p> <p>Because the first wife is very attentive and likes carrying the children and the children likes her too, I feel she will help in proper administration to one of the twins and limit its sharing among the twins. She will also make sure that older siblings don't temper with it because I have seen/observed how she keeps pepper, oil and magi out of the reach of the children</p> |
| <p>5. What other issues and concerns did you see with this family that are important for us to consider with regard to introduction of an MNP?</p> <p>Why?</p>                                                         | <p>The major concern I see and observed in this family is that the children of the required age are twins and both of them are always demanding the same thing together at almost the same time</p> <p>Because if proper sensitization and awareness in the usage of the MNP is not done properly, there is a tendency of MNP sharing since they are together, she may decide to mix the MNP for the children in the same place when the product has been scaled up to ease her work.</p>                                                                         |
| <p>6. Based on your experience observing this child today, do you believe reactivity negatively impacted your ability to see the food-related behaviors of the child?</p> <p>Please explain your answer in detail.</p> | <p>No it has not hindered me from observing the actual behavior of the child towards food</p> <p>Because the child is just 7 months old and mostly feed on breast milk and a little of other food like waina</p>                                                                                                                                                                                                                                                                                                                                                  |

|  |  |
|--|--|
|  |  |
|--|--|
