# Supplementary material for: Acceptance and compliance with micronutrient powder (MNP) among children aged 6–23 months in northern Nigeria
Source: PLOS journal article supplement (doi:10.1371/journal.pgph.0000961), 2022-10-17
Supplement: S8 (10.1371/journal.pgph.0000961.s008) [file journal.pgph.0000961.s008]

# SPOT CHECK RECORDING FORM

State: ADAMAWA LGA: GUYUK Community: LAKUMNA

Sex of index child: FEMALE Age of index child (in months): 6

## Spot Check Information

1. Date of MNP distribution to household (circle option below based on LGA name above):

 **Kebbi:** BirninKebbi&Jega LGA: **June 16**

 **Kebbi:** Danko-wasagu: **June 17**

 **Adamawa:** Song, Ganye: **June 18**

 **Adamawa:** Guyuk **June 19**

2. Date of Spot Check Observation: 12-07-15

3. Number of sachets remaining (Ask the caregiver to show you and count the specific number of sachets remaining):

34

4. Number of sachets that should remain using one MNP sachet per day (Analyst only):

38

5. Number of sachets remaining / number of sachets should be remaining (Analyst only):

34 / 38 = 89.5 %

## Probes

**Question 1.** You have **XX** MNP sachets remaining. Explain how easy or difficult it was to use the MNP product on a daily basis for your child 6 – 23 months? (Circle one answer)

**Very Difficult**

**Difficult**

**Easy**

**Very Easy**

**Question 2.** Describe any specific challenges that you faced that made the MNP difficult to use on a daily basis? NO CHALLENGES AT ALL.

**Question 3.** Describe specific aspects of the MNP product that you or your child enjoyed that made it easier to use on a daily basis? WELL, ME PERSONALLY, I VIEW THE POWDER AS A VACCINATION AGAINST DISEASES AND ILL HEALTH TO A CHILD..... THAT IS THE MOTIVATION THAT ENCOURAGES ME TO ADMINISTER THE MNP ON A DAILY BASIS WITHOUT DEFAULTING.

**Question 4.** What questions do you have about the MNP based on your experience using it? NO I DON'T HAVE ANY QUESTION IN SHORT, ME AM VERY HAPPY WITH THE MNP, I WOULD BE VERY GLAD TO USE IT ANYTIME, THAT IS WHY I NEVER MISSED A DAY SINCE I WAS GIVEN THE POWDER.

**Question 5.** What specific recommendations do you have that we can do as a program to make the MNP easier to use on a daily basis? I CANT THINK OF ANY FOR NOW.
